# Supplementary material
Source: publisher figshare collection journal article supplement (https://gsajournals.figshare.com/ndownloader/files/22079766)
Supplement: Supplementary file 1 [file 22079766]

## Sheet: T4_LL
gene_id	logFC	logCPM	F	PValue	FDR	protein_id	gene	product	gene_biotype	chrom	start	end	strand	HGNC.ID
gene10188:106603639	1.81137	3.74661	58.185	2.94781e-12	1.88832e-09	XP_014053009.1	LOC106603639	zinc finger and BTB domain-containing protein 16-A	protein_coding	ssa04	56572579	56726438	-	ZBTB16
gene10745:106604170	2.32526	8.07071	120.872	8.64066e-21	3.25955e-17	XP_014054065.1	LOC106604170	uncharacterized LOC106604170	protein_coding	ssa05	6002328	6060505	-	TSC22D3
gene1100:106604996	-1.83991	-0.433087	15.0115	0.00016146	0.00870115	XP_014055664.1	LOC106604996	vertebrate ancient opsin-like	protein_coding	ssa01	51567323	51590355	-
gene11332:106604687	1.0358	3.77426	17.2715	5.5327e-05	0.00395454	XP_014055069.1	LOC106604687	nocturnin-like	protein_coding	ssa05	31934070	31949002	+	NOCT
gene11824:106605162	1.0517	2.1137	25.0857	1.57499e-06	0.00021389	XP_014056012.1	LOC106605162	B-cell receptor CD22-like	protein_coding	ssa05	53443505	53457004	-
gene11900:100136378	2.02959	5.12915	76.7788	4.91438e-15	5.75338e-12	XP_014056187.1	LOC100136378	nuclear receptor subfamily 1 group D member 2	protein_coding	ssa05	54985944	54995916	-
gene12163:106605512	1.06954	1.62827	14.9324	0.000167711	0.00888294	XP_014056727.1	LOC106605512	E3 ubiquitin-protein ligase ZNRF2-like	protein_coding	ssa05	63340289	63426604	+	ZNRF2
gene12283:106605616	1.71314	2.22167	20.2241	1.40609e-05	0.00137178	XP_014056926.1	LOC106605616	zinc finger and BTB domain-containing protein 32-like	protein_coding	ssa05	66733656	66744865	+
gene12981:106606328	1.04447	3.64011	21.5438	7.69389e-06	0.000850864	XP_014057957.1	LOC106606328	cdc42 effector protein 4-like	protein_coding	ssa06	4622746	4630485	-	CDC42EP4
gene13469:106606823	1.05932	4.09276	52.5706	2.30768e-11	1.15218e-08	XP_014058670.1	LOC106606823	CD97 antigen-like	protein_coding	ssa06	22688928	22723381	+	ADGRE2
gene13602:106606840	2.15305	2.8105	37.0606	9.8785e-09	2.50287e-06	XP_014058698.1	LOC106606840	tripartite motif-containing protein 35-like	protein_coding	ssa06	23227575	23230326	-	TRIM35
gene13721:106606950	1.04276	5.90236	17.666	4.61886e-05	0.00340162	XP_014058921.1	LOC106606950	hepatic leukemia factor-like	protein_coding	ssa06	26604923	26618627	+	HLF
gene13852:106607080	1.17952	4.28347	51.1839	3.88026e-11	1.80464e-08	XP_014059146.1	LOC106607080	uncharacterized LOC106607080	protein_coding	ssa06	30800345	30804423	-
gene13950:106607162	1.49437	5.56473	89.2904	8.46122e-17	1.24899e-13	XP_014059277.1	LOC106607162	thyrotroph embryonic factor-like	protein_coding	ssa06	33642397	33646806	+	TEF
gene13954:106607159	2.84294	5.7176	173.835	1.63335e-26	2.77269e-22	XP_014059274.1	LOC106607159	cold shock domain-containing protein C2-like	protein_coding	ssa06	33682575	33687644	+	CSDC2
gene14213:106607496	1.49318	3.54562	38.0765	6.49845e-09	1.76503e-06	XP_014059972.1	LOC106607496	nuclear receptor subfamily 1 group D member 1-like	protein_coding	ssa06	40433684	40444584	+	NR1D1
gene14239:106607477	1.22298	6.03723	41.4406	1.69735e-09	5.28685e-07	XP_014059934.1	LOC106607477	pyruvate dehydrogenase (acetyl-transferring) kinase isozyme 2%2C mitochondrial-like	protein_coding	ssa06	41262924	41271441	+	PDK2
gene14257:106607467	1.39309	5.29264	33.7368	3.9202e-08	9.30732e-06	XP_014059922.1	LOC106607467	MAGUK p55 subfamily member 2-like	protein_coding	ssa06	41968935	42007802	+	MPP2
gene14734:106607948	2.14295	-0.33223	19.938	1.60003e-05	0.00149649	XP_014060938.1	LOC106607948	failed axon connections homolog	protein_coding	ssa06	62791889	62798772	-	FAXC
gene1493:106609599	2.50101	3.06874	56.5176	5.48946e-12	3.2697e-09	XP_014064038.1	LOC106609599	forkhead box protein J1-B-like	protein_coding	ssa01	75107702	75111902	+
gene15093:106608273	1.44317	3.71999	38.7714	4.90767e-09	1.37703e-06	XP_014061604.1	LOC106608273	delta-like protein 4	protein_coding	ssa06	81762941	81781041	-	DLL4
gene15999:106609100	1.24525	4.92367	78.3785	2.77394e-15	3.62224e-12	XP_014062979.1	LOC106609100	cyclin-dependent kinase inhibitor 1B-like	protein_coding	ssa07	30102650	30105966	-
gene16064:106609152	1.34803	0.261699	16.568	7.69346e-05	0.00504248	XP_014063108.1	LOC106609152	arg8-vasotocin receptor-like	protein_coding	ssa07	33487596	33490783	+	AVPR1A
gene16076:106609244	1.14375	1.27956	14.7284	0.000184983	0.00960263	XP_014063281.1	LOC106609244	uncharacterized LOC106609244	protein_coding	ssa07	34079240	34086061	-
gene16077:106609245	1.42961	4.5513	61.5714	8.69708e-13	6.15155e-10	XP_014063284.1	LOC106609245	forkhead box protein P2-like	protein_coding	ssa07	34088212	34206531	+
gene16302:100195265	1.02632	4.92051	68.554	7.52719e-14	7.09877e-11	NP_001133766.1	ccd53	Coiled-coil domain-containing protein 53	protein_coding	ssa07	42536848	42540982	-	CCDC53
gene17706:106610758	1.38223	2.08715	25.1868	1.50626e-06	0.000207041					ssa09	14013752	14015503	+
gene17920:106611031	3.3476	3.22121	147.846	7.16811e-24	8.11215e-20	XP_014066318.1	LOC106611031	ectonucleoside triphosphate diphosphohydrolase 5-like	protein_coding	ssa09	22830680	22843733	+	ENTPD5
gene18047:106611136	-2.06579	7.95682	50.2265	5.79875e-11	2.49207e-08	XP_014066501.1	LOC106611136	ornithine decarboxylase 1-like	protein_coding	ssa09	27129401	27134433	-	ODC1
gene18189:106611249	1.0931	4.49653	47.336	1.67571e-10	6.53931e-08	XP_014066734.1	LOC106611249	tyrosine-protein kinase receptor TYRO3-like	protein_coding	ssa09	35209543	35241464	-	TYRO3
gene18339:106611380	1.40139	1.64285	28.5148	3.52635e-07	5.92688e-05	XP_014067017.1	LOC106611380	calpain-1 catalytic subunit-like	protein_coding	ssa09	43853914	43878741	+
gene18566:106611581	-1.02819	2.11095	15.3219	0.000139154	0.0076945	XP_014067414.1	LOC106611581	teneurin-3-like	protein_coding	ssa09	55098962	55330563	-	TENM3
gene18767:106611738	1.24207	2.86423	22.1266	5.90479e-06	0.000686554	XP_014067736.1	LOC106611738	P2Y purinoceptor 4-like	protein_coding	ssa09	63937338	63941728	+	P2RY4
gene18957:106611923	1.6301	2.52013	32.2051	7.3224e-08	1.55377e-05	XP_014068061.1	LOC106611923	peroxisome proliferator-activated receptor gamma coactivator 1-beta-like	protein_coding	ssa09	70602976	70697546	-	PPARGC1B
gene19139:100194634	1.02293	5.57903	40.8114	2.16106e-09	6.49294e-07	NP_001133191.1	4ebp	eukaryotic translation initiation factor 4E binding protein 3-1	protein_coding	ssa09	79089856	79096928	-	EIF4EBP3
gene19280:106612265	1.83053	7.6619	114.179	5.30745e-20	1.50161e-16	XP_014068743.1	LOC106612265	TSC22 domain family protein 3-like	protein_coding	ssa09	85873453	85920619	+	TSC22D3
gene19306:106612291	5.24294	0.651028	89.4767	7.94775e-17	1.22652e-13	XP_014068796.1	LOC106612291	PCTP-like protein	protein_coding	ssa09	88604026	88624092	-	STARD10
gene19475:106612460	1.1411	4.60183	28.834	3.08785e-07	5.34875e-05	XP_014069081.1	sik2	salt-inducible kinase 2	protein_coding	ssa09	97462412	97529827	-	SIK2
gene19858:106612846	-2.82591	-0.67224	28.2134	4.01639e-07	6.65172e-05	XP_014069894.1	LOC106612846	tumor suppressor candidate 5 homolog	protein_coding	ssa09	111876725	111890808	-	TUSC5
gene20154:106613144	2.24632	-0.297099	21.2437	8.80963e-06	0.00094951	XP_014070590.1	LOC106613144	CLOCK-interacting pacemaker-like	protein_coding	ssa09	125288998	125304176	+
gene20633:106613622	1.46614	7.23814	67.3781	1.14521e-13	9.43203e-11	XP_014071548.1	LOC106613622	arrestin domain-containing protein 2-like	protein_coding	ssa10	14662011	14666423	-	ARRDC2
gene2090:106561770	1.03793	4.33764	27.3581	5.82949e-07	9.20544e-05	XP_013981487.1	LOC106561770	ras-GEF domain-containing family member 1B-B-like	protein_coding	ssa01	111439079	111447296	-	RASGEF1B
gene20940:106614019	-1.64949	-0.0575765	25.1755	1.5138e-06	0.000207238	XP_014072386.1	LOC106614019	39S ribosomal protein L55%2C mitochondrial-like	protein_coding	ssa10	24619347	24629538	+	MRPL55
gene21328:106560518	-1.80442	2.38023	52.6016	2.28107e-11	1.15218e-08	XP_013978965.1	LOC106560518	leucine-rich repeat-containing protein 19-like	protein_coding	ssa10	44255706	44272393	-
gene21390:106560584	1.33761	5.40492	16.8202	6.88465e-05	0.00459216	XP_013979089.1	mfi2	antigen p97 (melanoma associated) identified by monoclonal antibodies 133.2 and 96.5	protein_coding	ssa10	48389226	48402147	+	MFI2
gene21503:100194556	-3.32323	-0.580671	17.5009	4.96907e-05	0.00362028	NP_001133114.1	ldha	lactate dehydrogenase A4	protein_coding	ssa10	53904963	53926364	-	LDHB
gene21711:106561019	1.15786	2.76501	21.0702	9.53319e-06	0.00101144	XP_013980042.1	LOC106561019	uncharacterized LOC106561019	protein_coding	ssa10	70598853	70604812	-	PPP1R3A
gene22400:100136366	1.17176	5.00313	40.4757	2.4753e-09	7.24474e-07	NP_001117006.1	LOC100136366	cystic fibrosis transmembrane conductance regulator II	protein_coding	ssa10	103145208	103219332	-	CFTR
gene22974:106562111	1.41766	2.30079	17.1793	5.77144e-05	0.00407372	XP_013982184.1	LOC106562111	lymphatic vessel endothelial hyaluronic acid receptor 1-like	protein_coding	ssa11	18077457	18081197	-	LYVE1
gene23086:106562250	-1.58343	7.40543	27.4978	5.56949e-07	8.83597e-05	XP_013982489.1	LOC106562250	ammonium transporter Rh type C-like	protein_coding	ssa11	21627278	21633421	+	RHCG
gene23183:106562338	1.38441	2.57114	25.555	1.28059e-06	0.000179658	XP_013982631.1	LOC106562338	retinoblastoma-like protein 2	protein_coding	ssa11	25110537	25117640	-
gene23207:100136926	3.07339	6.79622	98.1407	6.33743e-18	1.26566e-14	NP_001117166.1	cyp1a	cytochrome P450 1A	protein_coding	ssa11	26100579	26103710	+	CYP1A1
gene23243:106562395	1.00543	3.45698	27.6475	5.13168e-07	8.21819e-05	XP_013982733.1	LOC106562395	retinoblastoma-like protein 2	protein_coding	ssa11	27770618	27773506	+
gene2341:106564343	1.18017	5.16384	27.6787	5.10769e-07	8.21819e-05	XP_013985876.1	LOC106564343	protein phosphatase Slingshot homolog 1-like	protein_coding	ssa01	120451805	120476222	+	SSH1
gene2377:106564765	2.00003	1.73108	16.5289	7.86182e-05	0.00512316	XP_013986586.1	LOC106564765	calsenilin-like	protein_coding	ssa01	121235088	121252179	+	KCNIP3
gene24057:106563294	1.38098	1.1348	37.783	7.29633e-09	1.96488e-06	XP_013984243.1	LOC106563294	ADP-ribosylation factor-like protein 3	protein_coding	ssa11	64711503	64717710	-	ARL3
gene24195:106563187	1.23394	4.08696	59.2589	1.98495e-12	1.32139e-09	XP_013983980.1	LOC106563187	solute carrier family 35 member E4-like	protein_coding	ssa11	72480774	72490676	-	SLC35E4
gene24198:106563184	1.88154	3.13867	127.144	1.48659e-21	8.41189e-18	XP_013983971.1	LOC106563184	V-type proton ATPase 116 kDa subunit a isoform 2-like	protein_coding	ssa11	72561047	72574129	-	ATP6V0A2
gene24231:106563387	-1.11909	4.5497	28.6676	3.31585e-07	5.68568e-05					ssa11	73663147	73670432	+
gene24341:106563453	4.39916	-1.40618	21.9416	6.41977e-06	0.000733864					ssa11	76116662	76118996	-
gene24824:106563956	1.80663	4.34739	115.832	3.29619e-20	1.01736e-16	XP_013985385.1	LOC106563956	tripartite motif-containing protein 35-like	protein_coding	ssa11	93294519	93307015	-	TRIM35
gene25505:106564720	-1.11173	3.41395	24.9563	1.66789e-06	0.000222065	XP_013986481.1	LOC106564720	C-X-C motif chemokine 11-like	protein_coding	ssa12	19630841	19632724	-
gene25538:106564658	1.99916	0.675852	17.9869	3.94981e-05	0.00302027	XP_013986321.1	LOC106564658	rhomboid-related protein 3-like	protein_coding	ssa12	20878203	20940381	-
gene25663:106564916	-1.05347	0.854622	17.2278	5.63697e-05	0.00399229					ssa12	24069994	24077621	+
gene26145:106565112	2.08184	6.03633	100.355	3.06427e-18	6.93568e-15	XP_013987325.1	LOC106565112	cryptochrome-1-like	protein_coding	ssa12	46213291	46223102	-	CRY1
gene26209:106565346	3.00779	7.37288	91.18	5.22976e-17	8.45502e-14	XP_013987820.1	LOC106565346	peptidyl-prolyl cis-trans isomerase FKBP5-like	protein_coding	ssa12	49824186	49850676	-	FKBP5
gene26325:106565435	1.04463	1.73267	18.8936	2.59067e-05	0.00218796	XP_013988046.1	LOC106565435	growth/differentiation factor 11-like	protein_coding	ssa12	53223044	53276090	+	GDF11
gene26468:106565524	1.00215	2.00881	21.7345	7.05075e-06	0.000795283					ssa12	58683246	58688130	-
gene26498:106565668	1.58618	5.73469	139.95	5.19474e-23	4.40917e-19	XP_013988493.1	LOC106565668	probable G-protein coupled receptor 61	protein_coding	ssa12	59405869	59412339	-	GPR61
gene26826:106565979	-1.27668	2.74059	27.4647	5.55537e-07	8.83597e-05	XP_013989180.1	LOC106565979	cytokine-inducible SH2-containing protein-like	protein_coding	ssa12	75673119	75680513	+	CISH
gene26964:106566029	1.30661	0.0190738	18.0564	3.82369e-05	0.00294372	XP_013989312.1	LOC106566029	tubby-related protein 1-like	protein_coding	ssa12	79038963	79046264	+	TULP1
gene2707:106568012	1.77554	3.63103	41.8888	1.41887e-09	4.54453e-07	XP_013993472.1	LOC106568012	caspase-3-like	protein_coding	ssa01	136638230	136642742	+
gene2715:106567959	1.3977	1.77195	31.1074	1.16404e-07	2.28441e-05	XP_013993360.1	LOC106567959	fibroblast growth factor receptor 1-A-like	protein_coding	ssa01	136921140	136944793	+	FGFR1
gene27168:106566111	1.99949	3.58177	55.9471	6.68824e-12	3.84868e-09	XP_013989436.1	LOC106566111	protein slowmo homolog 2-like	protein_coding	ssa12	81695770	81704494	+	PRELID3B
gene27580:106566494	2.27811	2.57714	45.7263	3.1333e-10	1.15629e-07	XP_013990051.1	slc6a8	solute carrier family 6 (neurotransmitter transporter)%2C member 8	protein_coding	ssa13	10329382	10356731	+	SLC6A8
gene28033:106566773	1.41349	1.8725	18.7181	2.81029e-05	0.00233281	XP_013990630.1	LOC106566773	semaphorin-3B-like	protein_coding	ssa13	28744081	28826142	-	SEMA3B
gene28441:106567289	-3.14994	3.17755	36.0158	1.54427e-08	3.7719e-06	XP_013991906.1	LOC106567289	suppressor of cytokine signaling 2-like	protein_coding	ssa13	43407984	43411559	-
gene28479:106567379	-3.32869	-0.956321	20.0248	1.53753e-05	0.001446	XP_013992025.1	LOC106567379	phosphatase and actin regulator 3-like	protein_coding	ssa13	45856726	45913743	-	PHACTR3
gene2866:106569712	1.18401	5.27632	50.4072	5.21725e-11	2.3004e-08	XP_013996760.1	ptges	prostaglandin E synthase	protein_coding	ssa01	143728252	143734628	-	PTGES
gene28770:106567727	1.92807	4.38314	49.8624	6.57154e-11	2.72177e-08	XP_013992835.1	LOC106567727	zinc finger and BTB domain-containing protein 16-A-like	protein_coding	ssa13	67427085	67550893	+	ZBTB16
gene28921:106567965	1.95322	3.92186	74.1168	1.15165e-14	1.30333e-11					ssa13	73766756	73805434	+
gene29080:106567822	1.06484	7.35123	68.1386	8.6845e-14	7.56019e-11	XP_013993063.1	LOC106567822	mitochondrial uncoupling protein 2-like	protein_coding	ssa13	79855364	79858786	-	UCP2
gene29763:100195489	1.98058	6.12789	57.2966	4.24071e-12	2.61775e-09	NP_001133990.1	ccr9	C-C chemokine receptor type 9	protein_coding	ssa14	5372143	5375220	+	CCR9
gene29984:106569003	1.76402	0.34637	14.9462	0.000166605	0.00885196	XP_013995411.1	LOC106569003	transforming growth factor beta-1-like	protein_coding	ssa14	12903028	12906628	-	GDF15
gene30144:106568821	1.55617	1.44337	29.3323	2.48114e-07	4.43354e-05	XP_013994981.1	LOC106568821	receptor-type tyrosine-protein phosphatase N2-like	protein_coding	ssa14	19839499	19987987	+	PTPRN2
gene30432:106569334	1.13072	6.68193	55.3472	8.25404e-12	4.59398e-09	XP_013996051.1	LOC106569334	HIG1 domain family member 1A%2C mitochondrial-like	protein_coding	ssa14	31584020	31588396	+	HIGD1A
gene30598:106569487	3.08569	6.86431	43.0731	9.3174e-10	3.10133e-07	XP_013996353.1	LOC106569487	carbonic anhydrase 4-like	protein_coding	ssa14	36255144	36267130	+
gene30663:106569547	1.82289	2.88056	65.6321	2.07131e-13	1.56273e-10	XP_013996482.1	LOC106569547	uncharacterized LOC106569547	protein_coding	ssa14	39069729	39093570	-
gene30786:106569680	2.19958	0.515241	30.3521	1.60455e-07	3.06539e-05	XP_013996719.1	LOC106569680	C-C motif chemokine 20-like	protein_coding	ssa14	43277973	43279601	+	CCL22
gene31614:106570478	-1.21141	1.16796	19.6118	1.85911e-05	0.00167423	XP_013998343.1	LOC106570478	phosphatidylserine synthase 1-like	protein_coding	ssa14	78506057	78520294	+
gene32862:100380418	2.12915	5.46739	70.843	3.64793e-14	3.64267e-11	NP_001167173.1	hs90a	Heat shock protein HSP 90-alpha	protein_coding	ssa15	46687864	46698666	-	HSP90AA1
gene33266:106572190	-1.43784	2.27769	46.0484	2.75327e-10	1.02721e-07	XP_014001606.1	LOC106572190	RING finger protein 223-like	protein_coding	ssa15	67673326	67680561	-	RNF223
gene33277:106572176	1.13866	5.15683	51.2726	3.75295e-11	1.76967e-08	XP_014001570.1	stk35	serine/threonine kinase 35	protein_coding	ssa15	68218130	68243469	+	STK35
gene33460:106572020	1.41527	4.55997	72.1026	2.24422e-14	2.38105e-11	XP_014001195.1	LOC106572020	ATPase family AAA domain-containing protein 3-like	protein_coding	ssa15	75700186	75714615	-	ATAD3A
gene33543:106572414	-1.17671	1.12711	21.1787	9.07409e-06	0.000974608	XP_014002032.1	LOC106572414	FERM domain-containing protein 4B-like	protein_coding	ssa15	80465617	80490663	+	FRMD4B
gene33644:106572486	1.08294	1.53366	16.018	9.9853e-05	0.00616384	XP_014002185.1	LOC106572486	transmembrane protein 198-like	protein_coding	ssa15	83045903	83050394	+
gene34008:106572869	1.71567	0.517875	15.759	0.000112948	0.0066356	XP_014002888.1	LOC106572869	heat shock 70 kDa protein-like	protein_coding	ssa15	97078466	97081729	-	HSPA1B
gene34009:106572868	1.34507	5.93173	57.2257	4.20534e-12	2.61775e-09	XP_014002885.1	LOC106572868	adenosylhomocysteinase 2-like	protein_coding	ssa15	97082419	97129696	-
gene34015:106572870	1.60474	2.46323	18.5083	3.10549e-05	0.00252841	XP_014002889.1	LOC106572870	extensin-like	protein_coding	ssa15	97285852	97289536	+
gene34016:106572862	1.12191	4.26682	16.9777	6.36992e-05	0.00437774	XP_014002879.1	LOC106572862	probable G-protein coupled receptor 61	protein_coding	ssa15	97289557	97292148	+	GPR61
gene34283:106573116	1.0847	4.78581	41.6567	1.53986e-09	4.84071e-07	XP_014003299.1	LOC106573116	dual specificity protein phosphatase 6-like	protein_coding	ssa16	8114561	8119050	-	DUSP6
gene3430:106574784	2.71007	5.66535	60.8785	1.19245e-12	8.26224e-10	XP_014006346.1	LOC106574784	protein asteroid homolog 1-like	protein_coding	ssa02	6265951	6269953	+	ASTE1
gene34605:106573471	3.12779	-0.957964	25.0399	1.60719e-06	0.000216531	XP_014004027.1	LOC106573471	neuropilin and tolloid-like protein 2	protein_coding	ssa16	25900714	25911049	+	NETO2
gene34891:106573584	1.81496	-0.403826	16.7007	7.22583e-05	0.00477284	XP_014004218.1	ncan	neurocan	protein_coding	ssa16	38433517	38670716	+
gene3503:106575420	1.02524	5.74736	32.544	6.38657e-08	1.42652e-05	XP_014007410.1	LOC106575420	tuftelin-like	protein_coding	ssa02	8156421	8188934	-
gene35081:106573936	-1.76456	-0.0893837	18.092	3.76072e-05	0.00290183	XP_014004877.1	LOC106573936	multidrug and toxin extrusion protein 1-like	protein_coding	ssa16	44664805	44680796	+	SLC47A1
gene35453:106574371	1.40788	4.90058	15.2354	0.000146016	0.00799579	XP_014005702.1	LOC106574371	phospholipase A2 inhibitor 31 kDa subunit-like	protein_coding	ssa16	65332456	65333715	-
gene35582:106574544	1.02034	3.04055	43.4645	7.5408e-10	2.58604e-07	XP_014005976.1	LOC106574544	multidrug resistance-associated protein 4-like	protein_coding	ssa16	71086341	71112965	+	ABCC4
gene35770:106574683	-1.10817	0.964018	19.4521	2.0011e-05	0.00177278	XP_014006163.1	LOC106574683	ADP-ribosylation factor-like protein 11	protein_coding	ssa16	75349651	75350620	+	ARL11
gene36040:106574970	2.39587	0.145469	25.0703	1.58574e-06	0.000214492	XP_014006580.1	LOC106574970	mitochondrial pyruvate carrier 2-like	protein_coding	ssa16	83342426	83346110	+
gene36228:106575072	1.0385	5.21738	59.0601	2.13253e-12	1.39233e-09	XP_014006704.1	LOC106575072	cyclin-dependent kinase inhibitor 1B-like	protein_coding	ssa17	5474196	5477321	-
gene36296:106575175	4.18169	1.82731	23.8725	2.73565e-06	0.000350484	XP_014006935.1	LOC106575175	MAGUK p55 subfamily member 4-like	protein_coding	ssa17	8515332	8526227	-	MPP4
gene36505:106575426	1.13876	1.65343	15.0485	0.000158622	0.00857545	XP_014007401.1	LOC106575426	phospholipase D1-like	protein_coding	ssa17	15454869	15461324	-
gene37165:106576058	1.55614	1.87667	33.4307	4.38067e-08	1.02571e-05	XP_014008379.1	strip2	striatin interacting protein 2	protein_coding	ssa17	36471048	36508785	-	STRIP1
gene37423:106576311	-1.09837	1.0003	16.1362	9.44021e-05	0.00593527					ssa17	45310266	45312681	+
gene37891:106576803	1.6148	6.63594	77.9399	3.27863e-15	4.12269e-12	XP_014009708.1	LOC106576803	cytochrome P450 1B1-like	protein_coding	ssa18	7182135	7189965	+	CYP1B1
gene38491:106577395	2.93257	4.45716	68.5463	8.0591e-14	7.39498e-11	XP_014010841.1	LOC106577395	DNA damage-inducible transcript 4 protein-like	protein_coding	ssa18	37356890	37358657	-	DDIT4
gene3869:106579093	-1.2099	2.66149	24.9869	1.6453e-06	0.000220684	XP_014014119.1	LOC106579093	squalene monooxygenase-like	protein_coding	ssa02	16356351	16368100	-	SQLE
gene38727:106577610	2.4993	4.57474	124.962	2.79973e-21	1.35791e-17	XP_014011292.1	LOC106577610	peroxisome proliferator-activated receptor gamma coactivator 1-alpha-like	protein_coding	ssa18	49962438	50336894	+	PPARGC1A
gene3889:106579025	-1.03323	2.32042	24.979	1.65102e-06	0.000220684	XP_014013909.1	LOC106579025	G-protein coupled receptor family C group 6 member A-like	protein_coding	ssa02	16964688	16968754	-	GPRC6A
gene38905:106577803	1.10271	4.42538	25.2095	1.49734e-06	0.000206652	XP_014011634.1	LOC106577803	large neutral amino acids transporter small subunit 2-like	protein_coding	ssa18	57180393	57203110	-	SLC7A8
gene39115:106577994	1.35772	4.56196	15.6121	0.000121915	0.00702742	XP_014011980.1	LOC106577994	putative ferric-chelate reductase 1	protein_coding	ssa18	63466866	63471491	+
gene3920:106579424	1.42304	1.71497	15.8222	0.000109597	0.00656249	XP_014014798.1	LOC106579424	brain-specific angiogenesis inhibitor 1-like	protein_coding	ssa02	18171329	18281042	+	ADGRB1
gene39204:106578097	1.12856	5.36882	26.7743	7.56922e-07	0.000114215	XP_014012163.1	LOC106578097	uncharacterized LOC106578097	protein_coding	ssa18	66488363	66491803	-
gene39315:106578213	1.75439	3.78348	59.6572	1.72838e-12	1.1736e-09	XP_014012332.1	LOC106578213	FH2 domain-containing protein 1-like	protein_coding	ssa18	69991102	69995407	-
gene39427:100195746	-1.17685	1.86678	20.4202	1.28265e-05	0.0012696	NP_001134247.1	cd37	Leukocyte antigen CD37	protein_coding	ssa19	4749506	4769374	-
gene39852:106578763	1.18082	4.41454	96.293	9.76115e-18	1.84112e-14	XP_014013384.1	LOC106578763	CSC1-like protein 2	protein_coding	ssa19	34659968	34674133	-	TMEM63B
gene39880:106578786	1.52577	2.07801	20.036	1.53034e-05	0.001446	XP_014013420.1	LOC106578786	CSC1-like protein 2	protein_coding	ssa19	35968536	36044573	-	TMEM63B
gene40238:106579272	1.07772	3.29804	23.1007	3.80964e-06	0.000472048	XP_014014508.1	sema4g	sema domain%2C immunoglobulin domain (Ig)%2C transmembrane domain (TM) and short cytoplasmic domain%2C (semaphorin) 4G	protein_coding	ssa19	51657576	51689046	-
gene4031:101448021	1.05088	4.8599	50.2117	5.599e-11	2.43707e-08	NP_001265977.1	gbp	GSK-3-binding protein	protein_coding	ssa02	21990202	21991766	-	FRAT2
gene4053:106581253	1.01168	3.31145	18.4908	3.12371e-05	0.00253716	XP_014018661.1	LOC106581253	SH3 domain-binding protein 5-like	protein_coding	ssa02	22472460	22496426	-	SH3BP5
gene40618:106579507	1.69313	0.958015	32.4892	6.49795e-08	1.44191e-05	XP_014014930.1	lnx2	ligand of numb-protein X 2	protein_coding	ssa19	67452990	67472638	+
gene40641:106579534	1.51675	4.64476	134.621	2.05793e-22	1.39737e-18	XP_014015007.1	LOC106579534	mitochondrial fission regulator 1-like	protein_coding	ssa19	68323767	68337127	+	MTFR1
gene41046:106580130	2.47326	4.0777	117.271	2.26972e-20	7.70593e-17	XP_014016312.1	LOC106580130	formin-binding protein 1-like	protein_coding	ssa20	11930618	11962433	-	FNBP1
gene41076:106580103	1.40887	3.67037	68.2654	8.31313e-14	7.42734e-11	XP_014016248.1	fam222a	family with sequence similarity 222%2C member A	protein_coding	ssa20	13462329	13567308	+	FAM222A
gene4121:106581792	3.78997	0.230904	21.276	8.70723e-06	0.000941462					ssa02	24652729	24655550	-
gene41227:106579972	2.01446	1.80705	29.0267	2.8289e-07	5.00229e-05	XP_014015917.1	LOC106579972	calcium-binding mitochondrial carrier protein SCaMC-2-A-like	protein_coding	ssa20	18524495	18532052	+	SLC25A25
gene4157:106582110	1.80041	4.16489	112.226	9.11041e-20	2.37929e-16	XP_014020337.1	LOC106582110	nuclear receptor subfamily 1 group D member 2-like	protein_coding	ssa02	25864118	25874524	+
gene41644:106580522	1.11101	3.34204	29.9516	1.90346e-07	3.53138e-05	XP_014017161.1	LOC106580522	lysyl oxidase homolog 2B	protein_coding	ssa20	35361803	35405601	-	LOXL2
gene41882:106580735	-2.49406	-0.367974	19.5387	1.92281e-05	0.00172246	XP_014017558.1	LOC106580735	estrogen-related receptor gamma-like	protein_coding	ssa20	45674716	45687399	+
gene41906:106580757	1.70062	4.38835	82.7573	6.70515e-16	9.10586e-13	XP_014017614.1	LOC106580757	uncharacterized LOC106580757	protein_coding	ssa20	46281298	46297730	+
gene42056:106580909	2.25378	-1.21616	17.0564	6.11016e-05	0.00423359					ssa20	51153026	51157514	-
gene42294:106581151	1.74353	1.05492	21.5627	7.62152e-06	0.000848387	XP_014018481.1	LOC106581151	cell adhesion molecule 1-like	protein_coding	ssa20	60063033	60220036	+	CADM1
gene43038:106581900	-1.32796	3.26026	33.1129	5.00298e-08	1.14768e-05	XP_014019816.1	LOC106581900	high affinity cGMP-specific 3'%2C5'-cyclic phosphodiesterase 9A-like	protein_coding	ssa21	18967938	19002549	+	PDE9A
gene43092:106581890	-1.08331	1.78755	15.5746	0.000123329	0.00707288	XP_014019802.1	LOC106581890	major histocompatibility complex class I-related gene protein-like	protein_coding	ssa21	21859913	21861393	-
gene43271:106582091	1.43355	1.3283	28.4937	3.55863e-07	5.95167e-05	XP_014020302.1	LOC106582091	radixin	protein_coding	ssa21	29756518	29785455	-	RDX
gene43813:106582660	-2.06326	0.748499	33.2776	4.67003e-08	1.07859e-05	XP_014021394.1	LOC106582660	mitogen-activated protein kinase kinase kinase 12-like	protein_coding	ssa22	4158875	4221924	+	MAP3K12
gene43924:106582757	-2.12599	2.48813	73.9324	1.21217e-14	1.32756e-11	XP_014021622.1	LOC106582757	caM kinase-like vesicle-associated protein	protein_coding	ssa22	10579245	10624582	+
gene43926:106582759	1.02991	5.27135	17.697	4.54958e-05	0.00335789	XP_014021631.1	LOC106582759	semaphorin-3F-like	protein_coding	ssa22	10834046	10914733	+	SEMA3F
gene43968:106582810	1.22879	2.21682	17.0171	6.22442e-05	0.00428652	XP_014021736.1	LOC106582810	kazrin-like	protein_coding	ssa22	11789671	11947643	-	KAZN
gene43983:106582826	1.04079	2.87426	28.6294	3.35641e-07	5.72631e-05	XP_014021780.1	LOC106582826	membrane metallo-endopeptidase-like 1	protein_coding	ssa22	12333321	12382520	+	MMEL1
gene44237:106583131	-2.08509	1.13722	51.6941	3.20353e-11	1.55092e-08	XP_014022435.1	LOC106583131	calmodulin-binding transcription activator 1-like	protein_coding	ssa22	25427541	25554003	-	CAMTA1
gene44299:106583079	2.3159	1.42954	28.9932	2.87345e-07	5.05474e-05	XP_014022345.1	LOC106583079	potassium voltage-gated channel subfamily C member 1-like	protein_coding	ssa22	27556318	27560794	+
gene44423:106583303	1.29988	5.38626	47.9841	1.32088e-10	5.27589e-08	XP_014022815.1	LOC106583303	nuclear receptor subfamily 1 group D member 1-like	protein_coding	ssa22	32344989	32360627	-
gene44582:100196052	2.51987	5.07802	47.4262	1.69638e-10	6.54476e-08	NP_001134553.1	fkbp5	FK506 binding protein 5	protein_coding	ssa22	37514764	37546894	+
gene44651:106583488	1.59711	1.69268	15.1575	0.000150722	0.00822696	XP_014023197.1	LOC106583488	cryptochrome-1-like	protein_coding	ssa22	40954848	40967929	+	CRY1
gene44669:106583478	-1.75205	0.155151	25.8684	1.11569e-06	0.000158489	XP_014023181.1	LOC106583478	G0/G1 switch protein 2-like	protein_coding	ssa22	41312074	41313276	+	G0S2
gene44888:106583691	-1.52416	7.10446	25.8185	1.15807e-06	0.000163144	XP_014023663.1	LOC106583691	protein-glutamine gamma-glutamyltransferase 2-like	protein_coding	ssa22	52066047	52083310	-
gene45295:106583993	2.04662	-0.0582633	26.6975	7.75934e-07	0.000116565					ssa23	11013359	11023785	-
gene45383:106584172	-1.10383	3.77186	44.5526	4.92457e-10	1.72365e-07	XP_014024594.1	LOC106584172	growth arrest and DNA damage-inducible protein GADD45 alpha-like	protein_coding	ssa23	16313911	16319847	+	GADD45A
gene45541:106584304	-1.24488	1.50947	22.9318	4.10943e-06	0.000505504	XP_014024863.1	LOC106584304	zinc finger matrin-type protein 3-like	protein_coding	ssa23	24075636	24089744	+	ZMAT3
gene45630:106584368	1.25143	6.1373	27.9756	4.51007e-07	7.3616e-05	XP_014025071.1	LOC106584368	MAP kinase-interacting serine/threonine-protein kinase 2-like	protein_coding	ssa23	29300421	29316885	-	MKNK2
gene45776:106584498	1.6822	0.806181	19.1297	2.32236e-05	0.00198107	XP_014025348.1	LOC106584498	sodium- and chloride-dependent GABA transporter 2-like	protein_coding	ssa23	35265841	35314108	+	SLC6A13
gene45901:106584628	1.01229	4.83545	54.9804	9.43937e-12	5.16897e-09	XP_014025587.1	LOC106584628	protein phosphatase 1 regulatory subunit 15A-like	protein_coding	ssa23	40740383	40743893	-	PPP1R15A
gene46202:106584946	-1.42695	0.43745	20.1807	1.43136e-05	0.0013845					ssa24	3309166	3311141	-
gene467:106583171	2.24457	4.36252	26.27	9.53366e-07	0.000138324					ssa01	22492133	22495335	-
gene4714:106587516	1.73139	7.0766	92.989	2.73892e-17	4.64945e-14	XP_014031453.1	LOC106587516	hexokinase-1-like	protein_coding	ssa02	46850090	46865095	+	HK1
gene47359:106586132	1.31489	3.30774	40.3302	2.61262e-09	7.5813e-07	XP_014028498.1	LOC106586132	1-phosphatidylinositol 4%2C5-bisphosphate phosphodiesterase delta-4-like	protein_coding	ssa25	9822391	9849786	-	PLCD4
gene47375:100306754	1.29278	5.04287	31.5014	9.96291e-08	2.02545e-05	NP_001158765.1	cxcr4	C-X-C chemokine receptor type 4	protein_coding	ssa25	10347591	10349559	+	CXCR4
gene47850:106586618	1.8173	2.47954	19.3893	2.07032e-05	0.0018257	XP_014029575.1	LOC106586618	G-protein coupled receptor 143-like	protein_coding	ssa25	32360025	32375961	+
gene48247:106587027	1.38356	1.94457	14.7828	0.000180289	0.00939185	XP_014030349.1	LOC106587027	chromaffin granule amine transporter-like	protein_coding	ssa26	2402042	2410031	+	SLC18A1
gene48643:106587395	-1.55219	1.0081	17.328	5.37769e-05	0.00387639	XP_014031227.1	LOC106587395	stereocilin-like	protein_coding	ssa26	22423155	22435694	+	STRC
gene48784:100136916	3.08273	8.38233	186.058	1.05107e-27	3.56849e-23	NP_001117159.1	cyp1a	cytochrome P450 1A	protein_coding	ssa26	28328216	28332256	+
gene4931:106589539	1.07672	1.32225	18.2364	3.51585e-05	0.00277597	XP_014035127.1	LOC106589539	nuclear factor interleukin-3-regulated protein-like	protein_coding	ssa02	54440786	54443321	-
gene497:106589077	1.28227	5.37196	63.8851	3.83327e-13	2.76901e-10	XP_014034266.1	LOC106589077	delta-like protein 4	protein_coding	ssa01	23882677	23889606	-	DLL4
gene4980:106590030	1.20326	4.71508	28.6876	3.29738e-07	5.6827e-05	XP_014035998.1	LOC106590030	heme oxygenase-like	protein_coding	ssa02	55729594	55733308	-	HMOX1
gene49978:106588523	5.27936	-1.68711	18.4103	4.71027e-05	0.00345396	XP_014033113.1	LOC106588523	integumentary mucin C.1-like	protein_coding	ssa27	13958065	13959011	-
gene49979:106588522	5.10059	-1.5179	16.4323	0.000110642	0.00658121	XP_014033112.1	LOC106588522	mucin-2-like	protein_coding	ssa27	13960290	13978734	-
gene5016:106590330	1.34748	4.55018	47.3872	1.6509e-10	6.5174e-08	XP_014036693.1	LOC106590330	heme oxygenase-like	protein_coding	ssa02	56912576	56916329	+	HMOX1
gene50440:106588854	2.36014	-0.442246	15.3796	0.000135365	0.00755886	XP_014033812.1	LOC106588854	uncharacterized LOC106588854	protein_coding	ssa27	28257252	28258989	-
gene50748:106589263	-2.02038	-0.629538	19.6912	1.79236e-05	0.00162352	XP_014034461.1	LOC106589263	PH and SEC7 domain-containing protein 1-like	protein_coding	ssa28	421288	537654	+
gene50834:106589341	1.0275	4.75759	69.0208	6.41182e-14	6.21965e-11					ssa28	4036670	4110035	+
gene51815:106590294	1.31276	1.43054	18.9717	2.49856e-05	0.00211938	XP_014036618.1	LOC106590294	uncharacterized LOC106590294	protein_coding	ssa29	17786779	17850364	+	AHRR
gene52147:106590608	1.23695	4.36655	42.5856	1.06803e-09	3.52045e-07	XP_014037209.1	LOC106590608	methionine synthase reductase-like	protein_coding	ssa29	31983161	32003450	+
gene56427:106591944	6.46378	1.10397	107.464	5.0079e-19	1.21445e-15	XP_014038685.1	LOC106591944	secretogranin-2-like	protein_coding	NW_012347437.1	21808	25619	+
gene56580:100380811	1.91797	4.09596	22.5687	4.8988e-06	0.000583577	NP_001167404.1	gadl1	glutamate decarboxylase-like 1	protein_coding	NW_012343443.1	38240	56951	+	GADL1
gene5779:106597311	1.17527	5.27542	16.4084	8.35027e-05	0.00536932	XP_014043995.1	LOC106597311	C-C chemokine receptor type 9-like	protein_coding	ssa03	6473710	6478132	+	CCR9
gene6061:106598526	1.57642	6.63887	51.1934	3.97849e-11	1.82532e-08	XP_014045048.1	LOC106598526	regulator of G-protein signaling 21-like	protein_coding	ssa03	10147628	10149963	+	RGS13
gene61616:106594092	1.62209	3.76758	19.2795	2.18394e-05	0.00187714	XP_014040939.1	LOC106594092	acidic amino acid decarboxylase GADL1-like	protein_coding	NW_012351839.1	4673	11908	-	GADL1
gene6180:100194912	1.16577	5.26276	31.316	1.07511e-07	2.15983e-05	NP_001133413.1	angl4	Angiopoietin-related protein 4	protein_coding	ssa03	13243546	13250936	+	ANGPTL4
gene6399:106599387	-1.75083	0.411575	15.5391	0.000125437	0.00712159	XP_014046072.1	LOC106599387	beta-1%2C4-galactosyltransferase 2-like	protein_coding	ssa03	22743295	22884156	+	B4GALT2
gene6530:106599739	1.94521	5.56111	54.169	1.32983e-11	6.946e-09	XP_014046516.1	LOC106599739	forkhead box protein Q1-like	protein_coding	ssa03	29438902	29440583	+	FOXQ1
gene66417:106591512	1.88027	0.614479	18.9677	2.50323e-05	0.00211938					NW_012344304.1	27842	29033	-
gene6708:106600212	1.10511	1.83112	20.582	1.19114e-05	0.00120718	XP_014047009.1	LOC106600212	C-X-C chemokine receptor type 4-like	protein_coding	ssa03	36120326	36124628	-
gene68502:106592479	3.41252	4.48652	76.9494	4.83722e-15	5.75338e-12	XP_014039309.1	LOC106592479	DNA damage-inducible transcript 4 protein-like	protein_coding	NW_012348273.1	2157	4405	+	DDIT4
gene70461:106594213	1.31139	1.0064	15.9415	0.000103552	0.00628928					NW_012352134.1	6885	9889	-
gene7092:106600736	-1.1499	0.230377	15.5572	0.000124357	0.00709588	XP_014047797.1	LOC106600736	heat shock 70 kDa protein-like	protein_coding	ssa03	51566843	51568367	-
gene71096:106592036	1.62393	0.30246	18.595	2.97563e-05	0.00244023	XP_014038808.1	LOC106592036	transient receptor potential cation channel subfamily M member 5-like	protein_coding	NW_012347555.1	19286	25068	-
gene71661:106591203	-1.1192	1.76894	16.8646	6.68809e-05	0.00449638	XP_014037891.1	LOC106591203	protein tyrosine phosphatase type IVA 3-like	protein_coding	NW_012343555.1	41906	49985	-
gene7265:106600850	2.55642	6.17957	122.682	5.5288e-21	2.34635e-17	XP_014048041.1	LOC106600850	pyruvate dehydrogenase (acetyl-transferring) kinase isozyme 2%2C mitochondrial-like	protein_coding	ssa03	56925222	56933199	-	PDK2
gene7293:106600825	1.40733	2.89744	27.0601	6.62783e-07	0.00010275	XP_014048002.1	LOC106600825	nuclear receptor subfamily 1 group D member 1-like	protein_coding	ssa03	57681090	57690624	-	NR1D1
gene7605:100194913	1.04202	3.61176	37.1561	9.41772e-09	2.40407e-06	NP_001133414.1	csdc2	cold shock domain containing C2%2C RNA binding	protein_coding	ssa03	65477156	65481446	-
gene7609:106601241	1.99518	5.71754	93.4626	2.44103e-17	4.36187e-14	XP_014048762.1	LOC106601241	thyrotroph embryonic factor-like	protein_coding	ssa03	65518746	65523154	-	TEF
gene7693:106601356	1.87359	6.2916	99.4149	3.95671e-18	8.39589e-15	XP_014048990.1	LOC106601356	uncharacterized LOC106601356	protein_coding	ssa03	68126773	68130707	+
gene78525:106592464	-1.2768	1.39289	20.1939	1.42269e-05	0.001384	XP_014039290.1	LOC106592464	angiopoietin-related protein 7-like	protein_coding	NW_012348255.1	9350	19288	+
gene816:106601984	1.68774	2.51338	29.8487	1.98957e-07	3.67108e-05	XP_014049906.1	egln3	egl-9 family hypoxia-inducible factor 3	protein_coding	ssa01	35365931	35373992	-	EGLN3
gene8228:106601860	-1.1249	2.56008	18.2254	3.5339e-05	0.0027773	XP_014049750.1	LOC106601860	centriolar coiled-coil protein of 110 kDa-like	protein_coding	ssa03	83914702	83937454	-	CCP110
gene8765:106602328	1.04793	3.9747	33.2882	4.6494e-08	1.07859e-05	XP_014050372.1	LOC106602328	coronin-2A-like	protein_coding	ssa04	8051509	8057534	+
gene9092:106602652	5.55274	-0.980453	24.5036	2.98896e-06	0.000378649	XP_014050881.1	LOC106602652	mucin-5AC-like	protein_coding	ssa04	18923256	18926614	-
gene9097:106602668	-4.91124	-1.52472	21.5781	7.56901e-06	0.000845315	XP_014050898.1	LOC106602668	mucin-5AC-like	protein_coding	ssa04	19096678	19102518	-
gene9592:106603059	1.06674	3.51377	25.5232	1.2986e-06	0.000181435					ssa04	35139831	35150166	+

## Sheet: T4_SP
gene_id	logFC	logCPM	F	PValue	FDR	protein_id	gene	product	gene_biotype	chrom	start	end	strand	HGNC.ID
gene10012:106603555	1.90601	2.33287	55.309	8.36354e-12	6.66551e-10	XP_014052876.1	LOC106603555	glycerophosphodiester phosphodiesterase domain-containing protein 5-like	protein_coding	ssa04	48317901	48357987	+	GDPD5
gene10040:106603530	1.38958	1.8641	12.2175	0.00062931	0.0035043	XP_014052830.1	c2cd2	C2 calcium-dependent domain containing 2	protein_coding	ssa04	49386425	49415417	+	C2CD2
gene10057:106603516	-1.49328	1.23079	31.5353	9.71243e-08	2.11783e-06	XP_014052782.1	LOC106603516	transmembrane protein 211-like	protein_coding	ssa04	50981356	51145087	-	TMEM211
gene10078:106603499	-1.22368	1.39029	23.1546	3.71874e-06	4.72334e-05					ssa04	52020227	52029469	+
gene10079:106603496	1.10872	2.9438	11.0925	0.00110171	0.00557605	XP_014052741.1	LOC106603496	T-box transcription factor TBX6L-like	protein_coding	ssa04	52036841	52059049	+
gene10117:106603470	-1.23222	-0.182792	11.2175	0.00103346	0.00528576	XP_014052672.1	rabgef1	RAB guanine nucleotide exchange factor (GEF) 1	protein_coding	ssa04	54464967	54492815	+	RABGEF1
gene10130:106603456	1.15689	6.48932	97.7452	6.29345e-18	2.6738e-15	XP_014052641.1	LOC106603456	3-methyl-2-oxobutanoate dehydrogenase [lipoamide] kinase%2C mitochondrial-like	protein_coding	ssa04	54843768	54884363	-	BCKDK
gene10188:106603639	2.53463	3.74661	111.483	1.14727e-19	6.95552e-17	XP_014053009.1	LOC106603639	zinc finger and BTB domain-containing protein 16-A	protein_coding	ssa04	56572579	56726438	-	ZBTB16
gene10246:106603697	-1.0096	0.241226	10.2542	0.00167724	0.00785975	XP_014053163.1	LOC106603697	uncharacterized LOC106603697	protein_coding	ssa04	61882185	61885741	+
gene10316:106603784	-1.15948	0.309601	14.4925	0.000207244	0.00139385	XP_014053353.1	LOC106603784	zinc finger protein 544-like	protein_coding	ssa04	64584385	64591740	-
gene10339:106603764	-1.054	2.83889	44.176	5.7054e-10	2.58617e-08	XP_014053293.1	rexo2	RNA exonuclease 2	protein_coding	ssa04	66834719	66856169	+	REXO2
gene10377:100846970	-1.11084	7.99809	51.4237	3.54583e-11	2.38385e-09	NP_001239293.1	irf1-2	interferon regulatory factor 1 isoform 2	protein_coding	ssa04	69623751	69628218	+	IRF1
gene10389:106603841	-2.1721	-0.84861	12.0908	0.0006695	0.00368997	XP_014053501.1	LOC106603841	serine/threonine-protein kinase 32A-like	protein_coding	ssa04	70064709	70150054	-	STK32A
gene1040:106604487	1.08087	4.35505	13.5651	0.000326059	0.0020234	XP_014054624.1	LOC106604487	protein FAM83H-like	protein_coding	ssa01	48321503	48353733	+
gene10424:106603870	1.13728	4.63293	78.3426	2.80683e-15	6.43882e-13	XP_014053549.1	LOC106603870	cytoplasmic polyadenylation element-binding protein 4-like	protein_coding	ssa04	72880572	72915342	-	CPEB4
gene10440:106603888	-1.52456	1.9566	25.353	1.39977e-06	2.05908e-05	XP_014053572.1	LOC106603888	interleukin-12 subunit beta-like	protein_coding	ssa04	73873017	73877138	-	IL12B
gene10454:106603903	1.03735	2.18502	10.0358	0.00187375	0.00860254	XP_014053598.1	LOC106603903	C-terminal-binding protein 2-like	protein_coding	ssa04	74167931	74182266	+	CTBP1
gene1047:106604528	2.08771	-1.08047	13.4925	0.000336481	0.00207971	XP_014054700.1	LOC106604528	BAG family molecular chaperone regulator 3-like	protein_coding	ssa01	48554183	48560927	+	BAG3
gene10486:106603932	-1.18276	2.70458	63.9405	3.74709e-13	4.44817e-11	XP_014053661.1	LOC106603932	neuferricin	protein_coding	ssa04	75533017	75535428	-	CYB5D2
gene10487:106603933	1.49659	3.84508	20.7169	1.12893e-05	0.000120757	XP_014053662.1	atp2a3	ATPase%2C Ca++ transporting%2C ubiquitous	protein_coding	ssa04	75625557	75726685	+	ATP2A1
gene10488:106603934	1.14899	1.63173	17.8934	4.12614e-05	0.000359565	XP_014053663.1	LOC106603934	calcium/calmodulin-dependent protein kinase kinase 1-like	protein_coding	ssa04	75747060	75887709	+	CAMKK1
gene10500:106603948	1.81787	0.903803	14.683	0.000189239	0.00129101	XP_014053678.1	LOC106603948	heat shock protein beta-1-like	protein_coding	ssa04	76301203	76316496	+	HSPB1
gene10505:106603952	1.03846	2.73805	12.6557	0.000506987	0.00292634	XP_014053691.1	LOC106603952	myotubularin-related protein 4-like	protein_coding	ssa04	76760201	76777932	+	MTMR4
gene10527:100136800	-1.0954	0.870799	14.5117	0.000205336	0.00138513	NP_001117153.1	pitx1	paired-like homeodomain 1	protein_coding	ssa04	77683988	77694702	+	PITX1
gene1057:106604587	-1.04106	3.51251	60.9199	1.09366e-12	1.14249e-10	XP_014054859.1	LOC106604587	PDZ and LIM domain protein 1-like	protein_coding	ssa01	48820927	48837591	-	PDLIM1
gene10573:106604009	1.05757	2.58513	13.524	0.000331394	0.0020535	XP_014053813.1	LOC106604009	ubiquitin-like protein 3	protein_coding	ssa04	79411216	79449699	-	UBL3
gene10624:106604057	1.26824	-0.306079	9.74759	0.00216894	0.00966879	XP_014053877.1	LOC106604057	uncharacterized LOC106604057	protein_coding	ssa04	81790117	81794208	-
gene10642:106604073	1.51526	2.09777	12.9723	0.000434656	0.00257449	XP_014053911.1	LOC106604073	putative P2Y purinoceptor 10	protein_coding	ssa05	147247	176008	-
gene10664:106604092	1.54898	2.04073	17.658	4.61111e-05	0.000394636	XP_014053954.1	LOC106604092	E3 ubiquitin-protein ligase RLIM-like	protein_coding	ssa05	794167	799724	-	RLIM
gene10703:106604126	1.79155	0.526752	16.6605	7.36446e-05	0.000586224	XP_014054005.1	LOC106604126	ribosomal protein S6 kinase alpha-6-like	protein_coding	ssa05	2973125	2989161	-
gene10735:106604162	-1.01379	3.0524	43.7943	6.62538e-10	2.94808e-08	XP_014054056.1	LOC106604162	DNA-directed RNA polymerase II subunit RPB7-like	protein_coding	ssa05	4878093	4884655	+	POLR2G
gene10740:106604165	-1.17275	1.07348	14.5899	0.000197738	0.0013408	XP_014054058.1	LOC106604165	kelch-like protein 4	protein_coding	ssa05	4989640	5030567	+	KLHL4
gene10745:106604170	2.1115	8.07071	101.681	2.03293e-18	9.58614e-16	XP_014054065.1	LOC106604170	uncharacterized LOC106604170	protein_coding	ssa05	6002328	6060505	-	TSC22D3
gene1080:106604807	2.10884	1.45274	23.1388	3.75133e-06	4.75406e-05	XP_014055328.1	LOC106604807	cytochrome P450 1B1-like	protein_coding	ssa01	49710488	49726903	+	CYP1B1
gene10821:106604175	2.40358	0.158423	32.0311	7.87895e-08	1.78332e-06	XP_014054068.1	LOC106604175	solute carrier family 25 member 48-like	protein_coding	ssa05	6542661	6553274	+	SLC25A48
gene10828:106604185	1.1372	0.784375	12.2278	0.000625661	0.00348684	XP_014054089.1	LOC106604185	probable E3 ubiquitin-protein ligase MID2	protein_coding	ssa05	6741966	6868410	-	MID2
gene10852:100196483	1.00914	1.488	10.121	0.00179425	0.00830017	NP_001134984.1	atp7a	ATPase%2C Cu++ transporting%2C alpha polypeptide	protein_coding	ssa05	7749446	7754024	-
gene10858:106604209	-1.14499	2.8598	43.8064	6.5941e-10	2.93801e-08	XP_014054129.1	LOC106604209	ATP synthase subunit O%2C mitochondrial-like	protein_coding	ssa05	7824670	7829287	-
gene10885:106604256	1.50876	1.59344	25.522	1.29929e-06	1.93551e-05	XP_014054210.1	LOC106604256	FH2 domain-containing protein 1-like	protein_coding	ssa05	9564944	9592223	-
gene10921:106604278	-1.38643	0.845216	18.3359	3.35663e-05	0.000303249	XP_014054241.1	LOC106604278	probable tRNA(His) guanylyltransferase	protein_coding	ssa05	11019221	11038765	-
gene10944:106604295	1.76956	-0.413503	11.3444	0.000969984	0.00500991	XP_014054266.1	LOC106604295	stanniocalcin-2-like	protein_coding	ssa05	11924259	11938509	+	STC2
gene10952:106604312	1.18741	4.1439	13.1284	0.000403524	0.00242436	XP_014054302.1	LOC106604312	ankyrin repeat and KH domain-containing protein 1-like	protein_coding	ssa05	12270179	12297847	+	ANKHD1
gene10960:106604318	1.63363	0.743204	10.3431	0.00160404	0.00757845	XP_014054316.1	LOC106604318	ankyrin repeat and KH domain-containing protein 1-like	protein_coding	ssa05	12440563	12462316	+
gene10970:106604332	1.13464	3.50346	31.6251	9.35078e-08	2.04686e-06	XP_014054344.1	LOC106604332	beta-2 adrenergic receptor-like	protein_coding	ssa05	12953786	12960587	-	ADRB2
gene10996:100306751	-1.20035	3.66595	34.154	3.24121e-08	8.381e-07	NP_001158762.1	ddt4l	DNA-damage-inducible transcript 4-like protein	protein_coding	ssa05	15274775	15276730	-
gene11024:106604383	1.46401	0.324384	15.1195	0.000153316	0.0010797	XP_014054428.1	LOC106604383	uncharacterized LOC106604383	protein_coding	ssa05	15710814	15720758	-
gene11051:106604362	1.00689	1.59234	17.4083	5.17858e-05	0.000434548	XP_014054393.1	LOC106604362	monocarboxylate transporter 8-like	protein_coding	ssa05	16124878	16161778	+	SLC16A2
gene11082:106604495	-1.23691	0.016547	13.8069	0.000288771	0.00184079	XP_014054634.1	LOC106604495	integrin alpha-6-like	protein_coding	ssa05	18454633	18469794	+
gene11087:106604492	-1.53475	0.0930564	21.3926	8.23326e-06	9.26815e-05	XP_014054627.1	LOC106604492	extensin-like	protein_coding	ssa05	18595471	18600277	+
gene11093:106604488	1.01728	3.97798	19.4024	2.05208e-05	0.000200565	XP_014054620.1	bod1l1	biorientation of chromosomes in cell division 1-like 1	protein_coding	ssa05	18744723	18758357	+
gene11111:106604469	2.41679	-0.0289048	17.1996	5.71235e-05	0.000473221	XP_014054583.1	ky	kyphoscoliosis peptidase	protein_coding	ssa05	19725253	19732029	-	KY
gene11179:106604533	1.85047	3.2035	33.2428	4.78566e-08	1.16725e-06	XP_014054703.1	rapgef2	Rap guanine nucleotide exchange factor (GEF) 2	protein_coding	ssa05	24809842	24951005	-	RAPGEF2
gene11236:106604590	-1.10961	4.17897	74.0559	1.16302e-14	2.16954e-12	XP_014054852.1	LOC106604590	caltractin-like	protein_coding	ssa05	28268367	28275037	-	CETN2
gene11330:106604686	-1.40404	1.0346	23.028	3.93578e-06	4.9472e-05	XP_014055067.1	LOC106604686	cystine/glutamate transporter-like	protein_coding	ssa05	31784951	31794707	-	SLC7A11
gene11332:106604687	1.99965	3.77426	62.3449	6.69271e-13	7.3774e-11	XP_014055069.1	LOC106604687	nocturnin-like	protein_coding	ssa05	31934070	31949002	+	NOCT
gene11348:106604804	-1.04155	3.99944	43.4732	7.51518e-10	3.30502e-08	XP_014055322.1	LOC106604804	stonustoxin subunit beta-like	protein_coding	ssa05	32241914	32249537	-
gene11351:106604702	-1.15795	0.238585	11.9359	0.000722847	0.00392035	XP_014055100.1	cssa05hxorf65	chromosome ssa05 open reading frame%2C human CXorf65	protein_coding	ssa05	32280673	32282742	+	CXorf65
gene11386:106604738	1.45581	4.08937	28.4371	3.68294e-07	6.6475e-06	XP_014055184.1	LOC106604738	transcription factor Sox-3-like	protein_coding	ssa05	33068928	33070755	+	SOX3
gene11401:106604748	-1.24414	2.10506	27.9932	4.41763e-07	7.75105e-06	XP_014055201.1	LOC106604748	transcription cofactor vestigial-like protein 2	protein_coding	ssa05	33886293	33893855	-	VGLL1
gene11413:106604757	-1.43753	3.36358	73.6262	1.34328e-14	2.45193e-12	XP_014055230.1	LOC106604757	membrane transport protein XK-like	protein_coding	ssa05	34293463	34310243	+	XKRX
gene11414:106604810	-1.75144	-0.850112	15.1423	0.000151647	0.00106994	XP_014055329.1	LOC106604810	cytochrome b-245 heavy chain-like	protein_coding	ssa05	34311606	34318268	+	CYBB
gene11432:100196601	-1.22711	2.15741	13.5083	0.000333908	0.00206719	NP_001135102.1	grhpr	glyoxylate reductase/hydroxypyruvate reductase	protein_coding	ssa05	34712959	34717137	+	GRHPR
gene11497:106604868	1.23965	2.01437	37.2872	8.92754e-09	2.80128e-07	XP_014055426.1	LOC106604868	Kv channel-interacting protein 1-like	protein_coding	ssa05	36409660	36454549	-	KCNIP1
gene11499:106604864	-1.13477	2.4339	48.8938	9.2333e-11	5.39552e-09	XP_014055415.1	LOC106604864	janus kinase and microtubule-interacting protein 1-like	protein_coding	ssa05	36485864	36533999	-
gene11554:106604964	-1.15244	0.145306	10.4646	0.00150813	0.00719559					ssa05	39017681	39020497	-
gene11572:106604929	-1.81746	0.690691	30.8174	1.31647e-07	2.75558e-06	XP_014055544.1	LOC106604929	alpha-1A adrenergic receptor-like	protein_coding	ssa05	39731481	39772225	+	ADRA1B
gene11685:106605050	-1.14318	2.38625	38.298	5.9206e-09	1.94401e-07	XP_014055773.1	LOC106605050	trophoblast glycoprotein-like	protein_coding	ssa05	47150004	47152295	-	TPBG
gene11695:106605056	-1.11646	3.00735	23.9361	2.62273e-06	3.51676e-05	XP_014055788.1	LOC106605056	thyrotropin-releasing hormone receptor-like	protein_coding	ssa05	47735277	47741530	-	TRHR
gene11713:106605076	1.10665	1.04324	20.1417	1.45716e-05	0.000150325					ssa05	49375901	49380016	+
gene11742:106605100	-1.71488	-0.500385	10.8044	0.00127106	0.00626596	XP_014055878.1	LOC106605100	zinc finger and SCAN domain-containing protein 2-like	protein_coding	ssa05	49940854	49944255	+
gene11764:106604998	1.68535	2.11168	53.8744	1.4207e-11	1.06713e-09					ssa05	51078051	51090073	+
gene11769:106605123	1.42742	4.43859	138.232	8.0745e-23	9.79062e-20	XP_014055930.1	LOC106605123	protein eva-1 homolog B-like	protein_coding	ssa05	51206406	51225958	+	EVA1B
gene11783:106605134	-1.41126	2.18973	53.4736	1.64858e-11	1.22744e-09	XP_014055955.1	LOC106605134	probable U3 small nucleolar RNA-associated protein 11	protein_coding	ssa05	51824843	51829991	+	UTP11L
gene1183:106606210	-1.27899	0.369757	15.1087	0.000154107	0.00108482					ssa01	55303317	55306874	+
gene11858:106605221	1.28659	4.52906	36.9017	1.05201e-08	3.2529e-07	XP_014056107.1	LOC106605221	RING finger protein 183-like	protein_coding	ssa05	54193685	54196207	+	RNF225
gene11900:100136378	1.87477	5.12915	68.4231	8.17593e-14	1.15179e-11	XP_014056187.1	LOC100136378	nuclear receptor subfamily 1 group D member 2	protein_coding	ssa05	54985944	54995916	-
gene11932:106605293	-1.07021	1.56395	19.8206	1.68872e-05	0.000169883	XP_014056243.1	LOC106605293	nuclear receptor subfamily 2 group F member 5	protein_coding	ssa05	56099135	56118305	+	NR2F2
gene11936:106605296	-1.62483	3.35112	11.7433	0.000798702	0.00427035	XP_014056250.1	LOC106605296	uncharacterized LOC106605296	protein_coding	ssa05	56174074	56177299	+
gene11968:106605330	-2.116	0.0146116	35.2003	2.10127e-08	5.83322e-07	XP_014056301.1	LOC106605330	HORMA domain-containing protein 1-like	protein_coding	ssa05	56914092	56922914	-	HORMAD1
gene1198:106606339	-1.07209	4.36457	51.2574	3.77448e-11	2.51269e-09	XP_014057971.1	LOC106606339	lymphocyte-specific helicase-like	protein_coding	ssa01	55782256	55799746	+	HELLS
gene11998:100195690	-1.50085	0.873136	39.0865	4.30521e-09	1.47941e-07	NP_001134191.1	metl6	Methyltransferase-like protein 6	protein_coding	ssa05	58006207	58008526	+	METTL6
gene12001:106605355	-1.2778	2.36812	31.1053	1.16507e-07	2.48307e-06	XP_014056351.1	LOC106605355	uncharacterized LOC106605355	protein_coding	ssa05	58064406	58066425	+
gene12009:106605365	-1.49706	2.22361	62.3377	6.60148e-13	7.30055e-11	XP_014056370.1	LOC106605365	uncharacterized LOC106605365	protein_coding	ssa05	58166154	58178539	-
gene12014:106605367	-1.19878	4.85554	117.585	2.02121e-20	1.46004e-17	XP_014056375.1	LOC106605367	CD83 antigen-like	protein_coding	ssa05	58274139	58277598	+	CD83
gene12026:106605376	-1.129	2.8045	40.1962	2.75658e-09	1.00604e-07	XP_014056393.1	ccne2	cyclin E2	protein_coding	ssa05	58423312	58428969	+	CCNE2
gene12027:106605377	-1.28086	0.674245	13.1295	0.00040171	0.00241474	XP_014056397.1	LOC106605377	neural-cadherin-like	protein_coding	ssa05	58430843	58488812	-
gene12039:106605469	-2.56278	-0.319849	42.1461	1.26826e-09	5.15055e-08	XP_014056649.1	LOC106605469	phosphomevalonate kinase-like	protein_coding	ssa05	58797232	58801326	+
gene12065:100194515	-1.50146	4.15267	109.452	2.01187e-19	1.13842e-16	NP_001133073.1	polr3gl	polymerase (RNA) III (DNA directed) polypeptide G like	protein_coding	ssa05	59375161	59385569	+	POLR3GL
gene12163:106605512	2.03818	1.62827	54.4768	1.13674e-11	8.73155e-10	XP_014056727.1	LOC106605512	E3 ubiquitin-protein ligase ZNRF2-like	protein_coding	ssa05	63340289	63426604	+	ZNRF2
gene12169:106605517	3.79932	-1.02432	33.2214	4.78109e-08	1.16725e-06	XP_014056732.1	LOC106605517	sodium- and chloride-dependent transporter XTRP3-like	protein_coding	ssa05	63529072	63550980	+	SLC6A20
gene12172:106605519	1.02517	2.32818	18.9777	2.49168e-05	0.000235596	XP_014056735.1	LOC106605519	LIM domain-containing protein 1-like	protein_coding	ssa05	63611893	63643634	-	LIMD1
gene12174:106605521	-1.27725	1.94914	16.1339	9.45048e-05	0.000720209	XP_014056737.1	LOC106605521	transmembrane protein 158-like	protein_coding	ssa05	63708257	63711267	+	TMEM158
gene12239:100194549	1.6296	2.57101	14.8323	0.000176661	0.00121932	NP_001133107.1	telt	titin-cap	protein_coding	ssa05	65551280	65552703	+	TCAP
gene12254:106605635	1.20486	3.19562	47.3102	1.69238e-10	8.97781e-09	XP_014056970.1	LOC106605635	B-cell receptor CD22-like	protein_coding	ssa05	65934664	65939695	+
gene12283:106605616	1.8857	2.22167	25.9443	1.0826e-06	1.66767e-05	XP_014056926.1	LOC106605616	zinc finger and BTB domain-containing protein 32-like	protein_coding	ssa05	66733656	66744865	+
gene12311:100137024	-1.01378	0.0732679	11.9488	0.000718249	0.00390164	XP_014056886.1	trp-iii	trypsin III	protein_coding	ssa05	67313989	67315478	-	PRSS2
gene12334:106605686	-1.01939	1.1698	13.7034	0.000303662	0.00191558	XP_014057051.1	LOC106605686	apolipoprotein C-II-like	protein_coding	ssa05	67829266	67831358	-	APOC2
gene12335:106605687	3.95774	0.986856	41.1773	1.87649e-09	7.20685e-08	XP_014057052.1	LOC106605687	uncharacterized LOC106605687	protein_coding	ssa05	67841956	67845089	-
gene12423:106605774	1.04377	2.79039	10.9274	0.00119582	0.00596524	XP_014057183.1	dbp	D site of albumin promoter (albumin D-box) binding protein	protein_coding	ssa05	69313747	69317580	+
gene12426:106605776	-1.0238	1.21307	16.6942	7.24814e-05	0.000578607	XP_014057186.1	LOC106605776	zinc finger protein 358-like	protein_coding	ssa05	69355710	69364362	+	ZNF524
gene12471:106605818	1.0901	1.43928	12.7514	0.000483467	0.00281257	XP_014057254.1	LOC106605818	epsin-1-like	protein_coding	ssa05	70397940	70419930	+	EPN1
gene12480:106605829	1.08035	0.163757	10.4226	0.00154042	0.00731965	XP_014057274.1	LOC106605829	zinc finger protein 628-like	protein_coding	ssa05	70484850	70509030	+	ZNF628
gene12514:106605864	1.09477	0.513915	10.4398	0.00152711	0.00726451	XP_014057320.1	LOC106605864	zinc finger protein 574-like	protein_coding	ssa05	71094870	71100585	-	ZNF526
gene12536:100195957	-3.24338	2.35977	17.9821	4.00185e-05	0.000350714	XP_014057348.1	asal	Mannose-specific lectin	protein_coding	ssa05	71606954	71619995	+
gene12632:106605986	1.73156	0.654035	15.351	0.000137229	0.000985004	XP_014057503.1	LOC106605986	RUN domain-containing protein 3B-like	protein_coding	ssa05	73903286	73911925	+	RUNDC3B
gene12634:106605987	-1.39257	1.7765	38.1632	6.25301e-09	2.0296e-07	XP_014057504.1	LOC106605987	solute carrier family 25 member 40-like	protein_coding	ssa05	73915259	73922762	-	SLC25A40
gene1267:106608700	-1.32391	0.402051	15.7967	0.000110935	0.000825052	XP_014062283.1	LOC106608700	dickkopf-related protein 1-like	protein_coding	ssa01	61030729	61032728	-	DKK1
gene12694:106606041	1.35223	2.18528	12.4654	0.000557074	0.00316503	XP_014057590.1	LOC106606041	kinesin-like protein KIF13A	protein_coding	ssa05	75783978	75791457	+
gene12710:106606059	-1.42976	0.988403	29.9892	1.87311e-07	3.72953e-06	XP_014057612.1	LOC106606059	cleft lip and palate transmembrane protein 1-like protein	protein_coding	ssa05	76091748	76098014	-	CLPTM1L
gene12831:106606175	2.90799	0.753307	27.7587	4.91007e-07	8.46627e-06	XP_014057782.1	LOC106606175	metastasis suppressor protein 1-like	protein_coding	ssa05	80221311	80253708	-
gene12863:106606205	2.26643	0.420911	15.4756	0.000129389	0.000937851	XP_014057817.1	LOC106606205	cAMP-dependent protein kinase type I-alpha regulatory subunit-like	protein_coding	ssa06	686108	697986	-	PRKAR1A
gene12891:100380397	-1.82181	0.995066	31.1697	1.13375e-07	2.42726e-06	NP_001167152.1	dpod1	DNA polymerase delta catalytic subunit	protein_coding	ssa06	1518057	1524671	+	POLD1
gene12908:106606254	1.19818	1.48808	10.8273	0.00125652	0.00620601	XP_014057878.1	LOC106606254	phosphatidylinositol N-acetylglucosaminyltransferase subunit Q-like	protein_coding	ssa06	2005921	2011060	-	PIGQ
gene12914:106606260	-1.16061	0.132466	16.0226	9.9635e-05	0.000753387	XP_014057882.1	LOC106606260	ADP-ribosylation factor-like protein 16	protein_coding	ssa06	2059427	2065334	+	ARL16
gene12935:106606286	1.01164	1.66261	10.6617	0.00136555	0.00664839	XP_014057902.1	LOC106606286	brain-specific angiogenesis inhibitor 1-associated protein 2-like	protein_coding	ssa06	3118924	3182088	+	BAIAP2
gene12936:106606295	-1.1923	1.40214	28.3625	3.7659e-07	6.77204e-06	XP_014057923.1	LOC106606295	zinc finger protein 501-like	protein_coding	ssa06	3200402	3212972	+	ZNF180
gene12941:106606293	-1.01646	2.05344	31.9107	8.28893e-08	1.85877e-06	XP_014057922.1	LOC106606293	zinc finger protein OZF-like	protein_coding	ssa06	3370229	3385155	+	ZNF180
gene12942:106606296	-1.12344	1.84926	30.0771	1.80416e-07	3.61801e-06	XP_014057928.1	LOC106606296	zinc finger protein 239-like	protein_coding	ssa06	3389596	3404405	+	ZNF180
gene12957:106606308	1.64839	-0.239793	9.93855	0.0019682	0.00894904	XP_014057940.1	LOC106606308	brain-specific angiogenesis inhibitor 1-associated protein 2-like	protein_coding	ssa06	4002398	4043245	-
gene12962:106606312	1.5064	2.78982	67.8272	9.66923e-14	1.35095e-11					ssa06	4107861	4115845	+
gene12964:106606314	1.11878	2.32137	11.6818	0.000820276	0.00436702	XP_014057946.1	LOC106606314	hepatocyte growth factor-regulated tyrosine kinase substrate-like	protein_coding	ssa06	4213328	4226749	-	HGS
gene12981:106606328	1.15678	3.64011	25.9129	1.09543e-06	1.68361e-05	XP_014057957.1	LOC106606328	cdc42 effector protein 4-like	protein_coding	ssa06	4622746	4630485	-	CDC42EP4
gene12989:106606338	1.8328	-0.140117	13.9155	0.000273954	0.00175922	XP_014057967.1	fbxl16	F-box and leucine-rich repeat protein 16	protein_coding	ssa06	4967935	5013628	+	FBXL16
gene13008:106606356	-2.09042	-0.382662	25.3014	1.43195e-06	2.09733e-05					ssa06	5438136	5446005	-
gene13049:100286729	-2.08319	3.05328	20.9651	1.00987e-05	0.000109997	NP_001140141.1	roa2	Heterogeneous nuclear ribonucleoproteins A2/B1	protein_coding	ssa06	7554874	7557447	-
gene1306:106607506	-1.30864	0.922945	24.0041	2.54454e-06	3.4268e-05	XP_014059991.1	hmx3	H6 family homeobox 3	protein_coding	ssa01	63831768	63834728	-	HMX3
gene13088:106606447	-1.25647	0.958167	21.4403	8.05696e-06	9.08475e-05	XP_014058132.1	LOC106606447	centromere protein X-like	protein_coding	ssa06	9170423	9171976	-	STRA13
gene13130:106606472	-1.19192	1.97339	31.7569	8.84436e-08	1.95874e-06	XP_014058160.1	LOC106606472	F-box/WD repeat-containing protein 9-like	protein_coding	ssa06	11110954	11113230	-	FBXW9
gene1314:106607606	1.27515	1.23933	24.629	1.92771e-06	2.69998e-05	XP_014060204.1	LOC106607606	serine-rich coiled-coil domain-containing protein 2-like	protein_coding	ssa01	64807980	64887317	-	CCSER2
gene13147:106606502	-1.27195	0.236954	12.8317	0.000464771	0.00272302	XP_014058231.1	LOC106606502	mitochondrial import inner membrane translocase subunit tim16-like	protein_coding	ssa06	11764375	11766566	-	PAM16
gene13172:106606520	1.46745	2.21371	19.1782	2.27281e-05	0.000217916	XP_014058254.1	LOC106606520	somatostatin receptor type 5-like	protein_coding	ssa06	12574494	12603664	-	SSTR5
gene13241:106606595	-1.16377	2.18537	10.6617	0.00136614	0.0066497	XP_014058372.1	LOC106606595	protein NLRC3-like	protein_coding	ssa06	15045414	15063068	-	RNH1
gene1325:106607693	1.94385	0.470521	34.5369	2.76488e-08	7.35662e-07	XP_014060396.1	LOC106607693	gremlin-2-like	protein_coding	ssa01	65546900	65554132	-	GREM2
gene13279:106606631	-1.45366	2.16738	45.7928	3.03983e-10	1.49573e-08					ssa06	16374724	16380311	+
gene13298:106606647	-2.00488	3.63422	41.3501	1.77216e-09	6.88406e-08	XP_014058465.1	LOC106606647	NADPH oxidase organizer 1-like	protein_coding	ssa06	16715105	16719734	-	NOXO1
gene1333:100380323	-1.33236	4.11092	56.549	5.30779e-12	4.47159e-10	NP_001167079.1	mot9	Monocarboxylate transporter 9	protein_coding	ssa01	65914026	65924466	-
gene13394:106606747	1.6488	0.0656464	12.7711	0.000478818	0.00279223	XP_014058584.1	LOC106606747	cerebellar degeneration-related protein 2-like	protein_coding	ssa06	19781926	19795525	-	CDR2
gene13405:106606801	2.57124	0.596056	36.1405	1.42694e-08	4.18326e-07	XP_014058630.1	LOC106606801	CMRF35-like molecule 8	protein_coding	ssa06	20201744	20207019	+
gene13409:106606798	-1.42375	-0.156356	14.9973	0.000162564	0.00113518	XP_014058626.1	LOC106606798	CMRF35-like molecule 3	protein_coding	ssa06	20255908	20261552	-	CD300LD
gene13417:106606764	-1.25097	2.04543	30.4399	1.54565e-07	3.16754e-06	XP_014058598.1	LOC106606764	uncharacterized LOC106606764	protein_coding	ssa06	20550706	20564389	-
gene13445:106606771	1.21381	1.81925	24.9818	1.64898e-06	2.35824e-05	XP_014058604.1	LOC106606771	adhesion G protein-coupled receptor E2-like	protein_coding	ssa06	21510130	21643529	-	ADGRE2
gene13469:106606823	1.39291	4.09276	91.942	3.69615e-17	1.38476e-14	XP_014058670.1	LOC106606823	CD97 antigen-like	protein_coding	ssa06	22688928	22723381	+	ADGRE2
gene13602:106606840	3.00117	2.8105	68.7127	7.29854e-14	1.03679e-11	XP_014058698.1	LOC106606840	tripartite motif-containing protein 35-like	protein_coding	ssa06	23227575	23230326	-	TRIM35
gene13646:106606884	1.07712	6.59818	32.9961	5.29382e-08	1.27265e-06	XP_014058811.1	LOC106606884	perforin-1-like	protein_coding	ssa06	24653815	24657294	-	PRF1
gene13721:106606950	1.15512	5.90236	21.5676	7.67419e-06	8.71684e-05	XP_014058921.1	LOC106606950	hepatic leukemia factor-like	protein_coding	ssa06	26604923	26618627	+	HLF
gene13726:106606946	-1.04303	3.27222	57.5142	3.73312e-12	3.25818e-10	XP_014058916.1	LOC106606946	chromobox protein homolog 2-like	protein_coding	ssa06	26716775	26723379	-	CBX2
gene13740:106606966	-1.09083	0.218941	9.78437	0.0021287	0.00952195	XP_014058949.1	LOC106606966	cerebellar degeneration-related protein 2-like	protein_coding	ssa06	27731318	27742268	-	CDR2L
gene13747:106606974	1.17549	1.03734	10.5902	0.00141563	0.00683864	XP_014058977.1	LOC106606974	caskin-2-like	protein_coding	ssa06	27818944	27859431	+	CASKIN2
gene13759:106606985	-2.33622	-0.433564	30.7843	1.3351e-07	2.79113e-06	XP_014058993.1	LOC106606985	zinc finger protein 2-like	protein_coding	ssa06	28360323	28363685	-	ZNF180
gene13761:106606993	-1.91502	0.137792	20.5434	1.21237e-05	0.000128348					ssa06	28496826	28699778	+
gene13765:106606992	1.37065	4.8009	28.9844	2.91546e-07	5.46263e-06	XP_014058999.1	LOC106606992	envoplakin-like	protein_coding	ssa06	28845525	28849013	+	EVPL
gene13767:106606991	1.19784	1.1216	15.9287	0.000104181	0.00078098	XP_014058997.1	LOC106606991	sphingosine kinase 1-like	protein_coding	ssa06	28860566	28876624	-	SPHK1
gene13787:106607014	2.11038	4.39179	28.334	3.89146e-07	6.97199e-06	XP_014059017.1	LOC106607014	envoplakin-like	protein_coding	ssa06	29328333	29408963	+	EVPL
gene13797:106607055	-1.19511	2.79583	36.5253	1.21871e-08	3.69104e-07	XP_014059091.1	LOC106607055	DNA replication licensing factor mcm5-like	protein_coding	ssa06	29662964	29666118	+	MCM5
gene13819:106607038	-1.16298	3.43446	28.1515	4.12527e-07	7.31368e-06	XP_014059073.1	LOC106607038	transcription factor jun-B-like	protein_coding	ssa06	29993782	29995614	-	JUNB
gene13837:106607023	1.29263	3.74902	27.068	6.62756e-07	1.09548e-05	XP_014059033.1	LOC106607023	mucin-17-like	protein_coding	ssa06	30292809	30324678	-
gene13852:106607080	1.14057	4.28347	48.4558	1.09122e-10	6.14396e-09	XP_014059146.1	LOC106607080	uncharacterized LOC106607080	protein_coding	ssa06	30800345	30804423	-
gene13869:106607101	-1.23352	2.40913	38.1928	6.17851e-09	2.01697e-07	XP_014059176.1	LOC106607101	activating transcription factor 7-interacting protein 1-like	protein_coding	ssa06	31401362	31410392	-
gene13950:106607162	1.1518	5.56473	53.9054	1.40737e-11	1.06181e-09	XP_014059277.1	LOC106607162	thyrotroph embryonic factor-like	protein_coding	ssa06	33642397	33646806	+	TEF
gene13951:106607161	1.59975	3.54835	77.47	3.7402e-15	8.08813e-13	XP_014059276.1	LOC106607161	protein Tob2-like	protein_coding	ssa06	33653521	33659211	-	TOB2
gene13954:106607159	3.13717	5.7176	210.496	6.12168e-30	4.15675e-26	XP_014059274.1	LOC106607159	cold shock domain-containing protein C2-like	protein_coding	ssa06	33682575	33687644	+	CSDC2
gene13956:106607156	3.52462	1.66311	17.9952	3.97309e-05	0.000348734	XP_014059269.1	LOC106607156	heat-stable enterotoxin receptor-like	protein_coding	ssa06	33701872	33719340	+	GUCY2C
gene14024:106607370	-2.07265	0.132088	33.1854	4.85346e-08	1.18015e-06	XP_014059762.1	LOC106607370	DNA-3-methyladenine glycosylase-like	protein_coding	ssa06	34591838	34598364	-	MPG
gene14047:106607353	1.05557	5.92577	18.6111	2.97415e-05	0.00027372	XP_014059717.1	LOC106607353	3-phosphoinositide-dependent protein kinase 1-like	protein_coding	ssa06	35265309	35279404	-
gene14055:106607345	-1.52747	2.8583	49.4518	7.4676e-11	4.48687e-09					ssa06	35759329	35763943	+
gene14056:106607346	-1.09234	2.97536	61.9728	7.51486e-13	8.17747e-11	XP_014059707.1	LOC106607346	UNC93-like protein MFSD11	protein_coding	ssa06	35766467	35775686	-
gene14093:106607320	-1.5218	-0.454412	12.655	0.000506909	0.00292634	XP_014059641.1	LOC106607320	homologous-pairing protein 2 homolog	protein_coding	ssa06	36931889	36936304	-	PSMC3IP
gene14142:106607271	1.23666	4.16514	34.1126	3.30959e-08	8.52533e-07	XP_014059546.1	LOC106607271	cyclin-dependent kinase 12-like	protein_coding	ssa06	38328528	38345763	+	CDK12
gene14147:106607269	2.00941	2.91638	19.512	1.9625e-05	0.000193464	XP_014059541.1	LOC106607269	telethonin-like	protein_coding	ssa06	38461114	38464133	+
gene14213:106607496	1.33256	3.54562	30.3289	1.62411e-07	3.30775e-06	XP_014059972.1	LOC106607496	nuclear receptor subfamily 1 group D member 1-like	protein_coding	ssa06	40433684	40444584	+	NR1D1
gene14239:106607477	1.72726	6.03723	82.6173	7.23611e-16	2.03036e-13	XP_014059934.1	LOC106607477	pyruvate dehydrogenase (acetyl-transferring) kinase isozyme 2%2C mitochondrial-like	protein_coding	ssa06	41262924	41271441	+	PDK2
gene14257:106607467	1.18902	5.29264	21.6432	7.40557e-06	8.44563e-05	XP_014059922.1	LOC106607467	MAGUK p55 subfamily member 2-like	protein_coding	ssa06	41968935	42007802	+	MPP2
gene14258:106607466	5.19655	-0.0762394	59.4185	1.87408e-12	1.83976e-10	XP_014059921.1	LOC106607466	putative all-trans-retinol 13%2C14-reductase	protein_coding	ssa06	42007932	42014056	+
gene14303:106607436	-1.19448	0.917756	20.3525	1.32298e-05	0.000138332	XP_014059849.1	LOC106607436	dynein light chain 4%2C axonemal-like	protein_coding	ssa06	43675154	43678297	+	DNAL4
gene14312:106607428	-1.4179	0.485826	30.2178	1.69901e-07	3.43965e-06	XP_014059841.1	LOC106607428	zinc finger protein 502-like	protein_coding	ssa06	43815941	43818228	-
gene14315:106607426	1.01462	3.48756	11.6995	0.000814259	0.00434054	XP_014059836.1	LOC106607426	GEM-interacting protein-like	protein_coding	ssa06	43849987	43892176	+	GMIP
gene14326:106607541	-2.45557	0.0877237	50.9083	4.30453e-11	2.8213e-09					ssa06	44234579	44245235	+
gene14350:106607562	2.01114	0.389465	20.055	1.51635e-05	0.000155299	XP_014060088.1	LOC106607562	sine oculis-binding protein homolog	protein_coding	ssa06	46158977	46180830	+
gene14351:106607561	1.01024	3.29604	11.4138	0.00093826	0.00487599	XP_014060083.1	LOC106607561	rho-associated protein kinase 2-like	protein_coding	ssa06	46189113	46296076	+	ROCK2
gene14431:100195308	-1.21456	4.51096	127.616	1.3098e-21	1.24744e-18	XP_014060182.1	e2f6	Transcription factor E2F6	protein_coding	ssa06	50770300	50774926	+	E2F6
gene1444:106609062	-1.26887	-0.272974	10.6864	0.0013487	0.00657899	XP_014062919.1	LOC106609062	uncharacterized LOC106609062	protein_coding	ssa01	73740344	73765851	+
gene14467:106607691	1.38927	3.04781	25.3086	1.42998e-06	2.09534e-05	XP_014060379.1	filip1	filamin A interacting protein 1	protein_coding	ssa06	52126067	52172664	-
gene14486:106607709	-1.35478	0.799325	19.3013	2.14536e-05	0.000207963	XP_014060429.1	LOC106607709	cannabinoid receptor type 1A	protein_coding	ssa06	52857789	52862815	-	CNR1
gene14632:106607817	-1.04547	2.08797	36.3309	1.31971e-08	3.94067e-07	XP_014060664.1	heca	hdc homolog%2C cell cycle regulator	protein_coding	ssa06	58916220	58920779	+	HECA
gene14634:106607818	-1.21307	2.79436	46.7209	2.12336e-10	1.09393e-08	XP_014060668.1	cited2	Cbp/p300-interacting transactivator%2C with Glu/Asp-rich carboxy-terminal domain%2C 2	protein_coding	ssa06	58952417	58955194	-	CITED2
gene14667:106607847	-1.33134	2.04036	38.0901	6.44129e-09	2.08076e-07	XP_014060742.1	LOC106607847	zinc transporter 2-like	protein_coding	ssa06	60230502	60255115	-	SLC30A2
gene14716:106607921	1.30776	4.02893	31.6801	9.18488e-08	2.01575e-06	XP_014060873.1	LOC106607921	cdc42 effector protein 3-like	protein_coding	ssa06	62117024	62120604	+
gene14734:106607948	4.41903	-0.33223	50.5158	4.99117e-11	3.19727e-09	XP_014060938.1	LOC106607948	failed axon connections homolog	protein_coding	ssa06	62791889	62798772	-	FAXC
gene14776:106607967	1.0481	3.2219	20.4407	1.27067e-05	0.000133562	XP_014060979.1	LOC106607967	forkhead box protein O3-like	protein_coding	ssa06	64328681	64418122	+	FOXO3
gene14787:106607975	-1.17284	3.272	17.6187	4.70228e-05	0.000401527	XP_014060991.1	LOC106607975	interleukin-12 subunit beta-like	protein_coding	ssa06	64862373	64873847	+
gene14792:106607982	1.95651	-0.586807	13.5521	0.000326859	0.002028	XP_014060998.1	mettl24	methyltransferase like 24	protein_coding	ssa06	65147236	65194281	-	METTL24
gene14842:106608029	1.13676	2.24097	18.2245	3.53548e-05	0.000316835	XP_014061146.1	nhsl1	NHS-like 1	protein_coding	ssa06	67670202	67835114	-	NHSL1
gene14855:106608040	1.43714	1.46912	10.7844	0.00128446	0.00632196	XP_014061177.1	LOC106608040	1-phosphatidylinositol 4%2C5-bisphosphate phosphodiesterase beta-4-like	protein_coding	ssa06	68136702	68166340	+	PLCB4
gene14861:106608044	-1.32977	0.0810536	17.3509	5.32014e-05	0.000444996	XP_014061182.1	cssa06h2orf44	chromosome ssa06 open reading frame%2C human C2orf44	protein_coding	ssa06	68610851	68617645	+	C2orf44
gene14878:106608063	1.80226	-0.0159637	12.6265	0.000514069	0.00296067	XP_014061217.1	LOC106608063	1-phosphatidylinositol 4%2C5-bisphosphate phosphodiesterase beta-4-like	protein_coding	ssa06	69943826	70083012	+
gene14901:106608090	1.24191	3.78223	52.2185	2.63217e-11	1.86176e-09	XP_014061268.1	LOC106608090	CLOCK-interacting pacemaker-like	protein_coding	ssa06	70895761	70900230	-	CIPC
gene14920:106608137	1.82556	1.70641	15.3481	0.000137775	0.000987672	XP_014061356.1	LOC106608137	heat shock protein HSP 90-alpha 1	protein_coding	ssa06	72144452	72149825	+	HSP90AA1
gene1493:106609599	1.64889	3.06874	16.2003	9.18179e-05	0.000702571	XP_014064038.1	LOC106609599	forkhead box protein J1-B-like	protein_coding	ssa01	75107702	75111902	+
gene15010:106608153	1.29804	0.602483	9.74991	0.00216637	0.00966117	XP_014061389.1	LOC106608153	signal-induced proliferation-associated 1-like protein 1	protein_coding	ssa06	76402244	76567085	+	SIPA1L1
gene15033:106608218	1.50927	2.60852	26.5347	8.33799e-07	1.32778e-05	XP_014061525.1	LOC106608218	RNA-binding protein 25-like	protein_coding	ssa06	77903545	77919203	-	RBM25
gene15040:106608229	2.23131	1.83567	34.2652	3.10426e-08	8.09468e-07	XP_014061540.1	LOC106608229	forkhead box protein N3-like	protein_coding	ssa06	78160990	78197256	+
gene15089:106608269	1.27002	2.38222	18.8054	2.69876e-05	0.000251995	XP_014061598.1	ino80	INO80 complex subunit	protein_coding	ssa06	81664835	81711043	+	INO80
gene15090:106608272	1.25964	1.58202	21.7952	6.85942e-06	7.92663e-05	XP_014061602.1	LOC106608272	DNA helicase INO80-like	protein_coding	ssa06	81717094	81727828	+	INO80
gene15126:106608296	1.05161	2.60476	10.1347	0.00178306	0.00826101	XP_014061637.1	LOC106608296	feline leukemia virus subgroup C receptor-related protein 2-like	protein_coding	ssa06	83021156	83082380	-	FLVCR2
gene15127:106608314	-1.02104	1.66165	10.4494	0.00151974	0.00723656	XP_014061669.1	LOC106608314	basic leucine zipper transcriptional factor ATF-like	protein_coding	ssa06	83088898	83095901	-	BATF
gene15136:106608316	1.96049	-0.0511641	17.424	5.14071e-05	0.000432118	XP_014061672.1	LOC106608316	kinesin-like protein KIF13B	protein_coding	ssa06	83355119	83364589	+
gene15165:106608345	1.40664	1.49132	19.3113	2.13544e-05	0.000207203	XP_014061715.1	LOC106608345	L-threonine 3-dehydrogenase%2C mitochondrial-like	protein_coding	ssa06	84840769	84863473	+
gene152:106606833	2.6875	0.55489	24.4055	2.1319e-06	2.93156e-05	XP_014058717.1	LOC106606833	uncharacterized LOC106606833	protein_coding	ssa01	6596726	6625919	+
gene15203:106608384	1.03838	2.1971	10.1196	0.00179576	0.00830511	XP_014061769.1	LOC106608384	transmembrane protein 214-like	protein_coding	ssa06	86870116	86876277	-	TMEM214
gene15215:106608397	2.18282	-0.147287	11.8711	0.000746434	0.00403024					ssa07	124067	129284	-
gene15269:106608466	-1.65001	1.63722	60.553	1.24701e-12	1.27139e-10	XP_014061871.1	LOC106608466	zinc finger protein OZF-like	protein_coding	ssa07	1984291	1990299	-
gene15270:106608465	-1.77621	0.685057	33.1693	4.88641e-08	1.18584e-06	XP_014061869.1	LOC106608465	piggyBac transposable element-derived protein 4-like	protein_coding	ssa07	2012167	2025643	-	PGBD3
gene15273:106608469	-2.27523	-0.0775106	35.5007	1.85645e-08	5.25235e-07	XP_014061874.1	LOC106608469	zinc finger protein 239-like	protein_coding	ssa07	2065573	2068351	-
gene15274:106608468	-1.06674	2.02878	36.414	1.27556e-08	3.83584e-07	XP_014061872.1	LOC106608468	zinc finger protein 664-like	protein_coding	ssa07	2078243	2088101	-
gene15285:106608478	-1.13599	1.19358	15.9528	0.000102998	0.000773989	XP_014061882.1	LOC106608478	transcriptional-regulating factor 1-like	protein_coding	ssa07	2876755	2882149	-
gene15412:106608522	1.58783	-0.00116442	15.4009	0.000133992	0.000965439	XP_014061952.1	LOC106608522	NACHT and WD repeat domain-containing protein 2-like	protein_coding	ssa07	4953874	4999858	+	NWD2
gene15415:106608525	1.15156	1.91166	9.99387	0.00191411	0.00875467	XP_014061957.1	LOC106608525	disintegrin and metalloproteinase domain-containing protein 33-like	protein_coding	ssa07	5069722	5224053	-	ADAM33
gene15430:106608537	1.7479	0.186717	21.2078	8.95458e-06	9.95146e-05	XP_014061968.1	LOC106608537	stromal interaction molecule 2-like	protein_coding	ssa07	6496842	6512664	-	STIM2
gene15434:106608541	-1.12071	4.49189	20.471	1.25983e-05	0.000132726	XP_014061973.1	LOC106608541	macrophage mannose receptor 1-like	protein_coding	ssa07	6591695	6596698	+
gene15443:106608552	-1.11188	6.18426	18.1452	3.69509e-05	0.000328726	XP_014061992.1	s100p	S100 calcium binding protein P	protein_coding	ssa07	8091739	8093532	-	S100P
gene15496:106608687	1.2453	2.70273	32.3478	6.89584e-08	1.58743e-06	XP_014062261.1	LOC106608687	mitogen-activated protein kinase kinase kinase 11-like	protein_coding	ssa07	11663749	11705705	-	MAP3K11
gene15543:106608647	1.01606	1.70549	18.387	3.2777e-05	0.000297067	XP_014062200.1	plin2	perilipin 2	protein_coding	ssa07	12693760	12698814	+	PLIN2
gene15578:106608616	1.23741	3.71322	26.7765	7.51975e-07	1.21773e-05	XP_014062133.1	LOC106608616	peroxisome proliferator-activated receptor gamma coactivator 1-alpha-like	protein_coding	ssa07	14079243	14163998	+	PPARGC1A
gene15600:106608781	1.32846	2.79653	26.8867	7.14444e-07	1.16616e-05	XP_014062383.1	LOC106608781	arf-GAP domain and FG repeat-containing protein 2-like	protein_coding	ssa07	17194822	17211374	+
gene15601:106608778	1.53135	2.49357	22.3767	5.28097e-06	6.35345e-05	XP_014062380.1	LOC106608778	insulin receptor substrate 1-B-like	protein_coding	ssa07	17212164	17297173	+
gene15622:106608761	-1.29257	2.38259	23.4264	3.29274e-06	4.24902e-05	XP_014062358.1	LOC106608761	tumor necrosis factor ligand superfamily member 12-like	protein_coding	ssa07	17703787	17717178	-	TNFSF12
gene15708:106608835	1.12115	1.98273	28.3128	3.84759e-07	6.89905e-06	XP_014062481.1	LOC106608835	Y+L amino acid transporter 2-like	protein_coding	ssa07	20319088	20336316	+	SLC7A7
gene15725:106608896	-1.01649	1.7963	19.8034	1.70218e-05	0.000170877	XP_014062575.1	LOC106608896	39S ribosomal protein L52%2C mitochondrial-like	protein_coding	ssa07	20684215	20687916	-	MRPL52
gene15778:106608879	1.59078	3.52383	57.1016	4.33821e-12	3.71936e-10	XP_014062543.1	LOC106608879	protein inturned-like	protein_coding	ssa07	21594550	21628366	+	INTU
gene15810:106608920	-1.00099	3.23935	48.9037	9.19838e-11	5.39368e-09	XP_014062611.1	mest	mesoderm specific transcript	protein_coding	ssa07	22039870	22056333	-	MEST
gene15823:106608932	-1.1694	1.01299	17.6604	4.60131e-05	0.000394095	XP_014062648.1	LOC106608932	mediator of RNA polymerase II transcription subunit 11	protein_coding	ssa07	22750986	22755594	-	MED11
gene15839:106608947	1.61725	3.40969	57.6724	3.52451e-12	3.08404e-10	XP_014062667.1	LOC106608947	plasminogen activator inhibitor 1-like	protein_coding	ssa07	23205704	23213642	-	SERPINE1
gene15871:106608972	-1.20184	0.486667	20.7751	1.09058e-05	0.00011732	XP_014062725.1	LOC106608972	TOX high mobility group box family member 4-B-like	protein_coding	ssa07	24047229	24058901	+	TOX4
gene15897:106608992	1.21347	1.63262	13.6215	0.000316001	0.00197411	XP_014062784.1	LOC106608992	purine nucleoside phosphorylase-like	protein_coding	ssa07	24942949	24951777	+	PNP
gene15911:106608909	-1.0535	0.971225	12.1235	0.000658747	0.00363751	XP_014062595.1	LOC106608909	uncharacterized LOC106608909	protein_coding	ssa07	25319608	25352170	+	SLAMF8
gene15955:106609032	1.66076	1.06421	14.7391	0.000184065	0.00126201	XP_014062842.1	LOC106609032	protein Shroom4-like	protein_coding	ssa07	26437255	26549411	+
gene15974:106609060	1.06799	3.7755	20.8703	1.04617e-05	0.000113333	XP_014062910.1	LOC106609060	rho GTPase-activating protein 6-like	protein_coding	ssa07	27851965	27947916	+
gene15977:106609064	1.23509	2.24977	16.5717	7.68026e-05	0.000607532	XP_014062916.1	LOC106609064	insulin receptor substrate 2-B-like	protein_coding	ssa07	28056960	28094539	+
gene16020:106609113	-2.12996	1.7824	71.4474	2.80179e-14	4.73251e-12	XP_014063018.1	LOC106609113	putative Dol-P-Glc:Glc(2)Man(9)GlcNAc(2)-PP-Dol alpha-1%2C2-glucosyltransferase	protein_coding	ssa07	32363465	32366216	+	ALG10
gene16076:106609244	1.3061	1.27956	13.7002	0.000304131	0.00191818	XP_014063281.1	LOC106609244	uncharacterized LOC106609244	protein_coding	ssa07	34079240	34086061	-
gene16077:106609245	1.01924	4.5513	29.6476	2.16977e-07	4.25076e-06	XP_014063284.1	LOC106609245	forkhead box protein P2-like	protein_coding	ssa07	34088212	34206531	+
gene161:106607246	-2.59983	-0.569124	25.4173	1.36062e-06	2.01371e-05	XP_014059536.1	LOC106607246	hippocalcin-like protein 1	protein_coding	ssa01	6861899	6889954	-	HPCAL1
gene16116:106609204	-1.94616	3.58183	126.358	1.83599e-21	1.6847e-18	XP_014063199.1	LOC106609204	zinc finger protein 800-like	protein_coding	ssa07	35670511	35699453	+	ZNF800
gene16123:106609198	1.91969	-0.103797	13.6544	0.000310988	0.00194984	XP_014063190.1	LOC106609198	leiomodin-2-like	protein_coding	ssa07	36390605	36396519	-	LMOD2
gene16192:106609297	-1.36569	1.5995	22.7099	4.54011e-06	5.58483e-05	XP_014063430.1	LOC106609297	coiled-coil domain-containing protein 136-like	protein_coding	ssa07	39137741	39184250	-	CCDC136
gene16219:106609270	-1.21371	2.0641	33.2726	4.67982e-08	1.14967e-06	XP_014063351.1	LOC106609270	transmembrane protein 110-like	protein_coding	ssa07	39677149	39696458	+
gene16230:106609337	1.23618	0.646082	12.2808	0.000609492	0.00341185	XP_014063510.1	LOC106609337	CUGBP Elav-like family member 2	protein_coding	ssa07	40593408	40764858	+
gene16241:106609348	1.35596	2.35481	13.9652	0.00026776	0.00172566	XP_014063564.1	podxl	podocalyxin-like	protein_coding	ssa07	41020293	41036335	+	PODXL
gene1626:106610906	-1.22656	1.51426	25.3566	1.39754e-06	2.05759e-05	XP_014066049.1	dync2li1	dynein%2C cytoplasmic 2%2C light intermediate chain 1	protein_coding	ssa01	83175413	83181585	+	DYNC2LI1
gene16260:106609368	1.82909	1.06526	20.6218	1.16965e-05	0.000124486	XP_014063615.1	LOC106609368	pendrin-like	protein_coding	ssa07	41490877	41502653	-	SLC26A4
gene16281:106609458	-1.11399	4.2033	50.3343	5.34542e-11	3.36737e-09	XP_014063794.1	LOC106609458	ubl carboxyl-terminal hydrolase 18-like	protein_coding	ssa07	42240637	42245944	+
gene16305:106609388	1.34119	1.04429	32.5145	6.42924e-08	1.49302e-06					ssa07	42583109	42598742	-
gene16332:106609430	-1.46887	3.21492	76.5981	4.98838e-15	1.04543e-12	XP_014063739.1	LOC106609430	uncharacterized LOC106609430	protein_coding	ssa07	43018381	43027266	+
gene16374:106609397	2.09935	2.5665	36.9617	1.02632e-08	3.18217e-07	XP_014063658.1	LOC106609397	fatty acyl-CoA reductase 1-like	protein_coding	ssa07	44548987	44601661	-	FAR1
gene16405:106609517	1.891	6.62276	137.62	9.59991e-23	1.12388e-19	XP_014063902.1	LOC106609517	sodium-coupled neutral amino acid transporter 2-like	protein_coding	ssa07	45708617	45720011	-	SLC38A2
gene16406:106609518	1.95659	6.5014	197.81	7.39435e-29	3.58636e-25	XP_014063905.1	LOC106609518	sodium-coupled neutral amino acid transporter 4-like	protein_coding	ssa07	45746913	45779055	-
gene16418:106609526	-1.36294	2.72769	31.1694	1.13388e-07	2.42726e-06	XP_014063920.1	LOC106609526	diphosphoinositol polyphosphate phosphohydrolase 3-beta-like	protein_coding	ssa07	46053811	46065902	-	NUDT4
gene16545:106609631	1.59553	1.26414	23.2469	3.5681e-06	4.55587e-05	XP_014064062.1	LOC106609631	semaphorin-3aa-like	protein_coding	ssa07	49792285	49795023	-
gene16627:106609711	1.12076	1.0651	15.0634	0.000157489	0.00110496	XP_014064157.1	LOC106609711	zinc finger and SCAN domain-containing protein 23-like	protein_coding	ssa07	52645922	52652632	+
gene16689:106609772	-1.70549	1.18922	39.4759	3.68056e-09	1.2909e-07	XP_014064256.1	LOC106609772	uncharacterized LOC106609772	protein_coding	ssa07	55052369	55056790	+	CCDC107
gene16723:106609809	2.26162	0.0889031	17.5712	4.79766e-05	0.000408849	XP_014064307.1	LOC106609809	receptor-type tyrosine-protein phosphatase beta-like	protein_coding	ssa07	56770017	56799458	-	PTPRB
gene16772:106609852	1.39762	3.46211	17.6529	4.6409e-05	0.000396759					ssa07	58662933	58726613	-
gene16779:106609868	-1.364	1.38693	17.4917	4.97991e-05	0.00042147					ssa08	1442	4155	+
gene16788:106609879	-1.14042	0.101513	10.4138	0.00154727	0.00734705	XP_014064378.1	LOC106609879	zinc finger and SCAN domain-containing protein 25-like	protein_coding	ssa08	305670	308803	-
gene16790:106609880	1.02955	7.48003	57.194	4.19463e-12	3.62372e-10	XP_014064379.1	LOC106609880	ATP-binding cassette sub-family A member 1-like	protein_coding	ssa08	344059	380535	+	ABCA1
gene16859:106609947	1.91327	-0.184314	20.8796	1.03981e-05	0.000112788					ssa08	2964692	2970525	+
gene16871:106609956	1.07214	0.732871	11.3686	0.000958328	0.00496433	XP_014064500.1	LOC106609956	uncharacterized LOC106609956	protein_coding	ssa08	3345143	3372739	+
gene16874:106609958	-1.38812	1.38128	15.1588	0.000150453	0.00106273	XP_014064502.1	LOC106609958	probable G-protein coupled receptor 83	protein_coding	ssa08	3460141	3464463	+	GPR83
gene16881:106609964	1.16315	2.50218	25.7673	1.16636e-06	1.77177e-05	XP_014064511.1	LOC106609964	LON peptidase N-terminal domain and RING finger protein 1-like	protein_coding	ssa08	3614138	3640220	-	LONRF1
gene16895:106609978	1.76036	5.36082	78.5395	2.71691e-15	6.27496e-13	XP_014064536.1	LOC106609978	RING finger protein 24-like	protein_coding	ssa08	4080337	4141674	-	RNF24
gene16907:100195868	-1.00387	3.61017	58.2235	2.88567e-12	2.61288e-10	NP_001134369.1	cisd2	CDGSH iron sulfur domain 2	protein_coding	ssa08	5947157	5952849	+	CISD2
gene1691:106613076	-1.29242	2.98375	55.7795	7.03585e-12	5.76991e-10	XP_014070448.1	LOC106613076	transmembrane protein 150A-like	protein_coding	ssa01	89551742	89642747	+
gene16914:106610022	-1.31395	0.745881	18.8187	2.68217e-05	0.000250791	XP_014064605.1	LOC106610022	meiotic nuclear division protein 1 homolog	protein_coding	ssa08	6357995	6400965	-	MND1
gene16957:106610049	-1.35162	0.198123	19.3824	2.06652e-05	0.00020179	XP_014064648.1	LOC106610049	zinc finger protein 629-like	protein_coding	ssa08	7967373	7971540	+
gene16958:106610047	-1.05592	0.46883	14.9379	0.00016727	0.00116396	XP_014064645.1	LOC106610047	zinc finger protein 271-like	protein_coding	ssa08	7976809	7980054	+
gene16959:106610054	-1.838	-0.78845	10.3016	0.00163746	0.00770631					ssa08	7981208	7983008	+
gene16969:106610122	-1.94405	0.175484	31.3824	1.03611e-07	2.24773e-06	XP_014064767.1	LOC106610122	zinc finger protein 263-like	protein_coding	ssa08	8092982	8095922	+
gene1697:106613059	1.61167	1.31268	24.4481	2.08875e-06	2.88156e-05	XP_014070417.1	LOC106613059	leucine zipper putative tumor suppressor 2 homolog	protein_coding	ssa01	89807163	89904339	-
gene16973:106610136	-1.48303	0.653912	27.9412	4.51824e-07	7.89495e-06	XP_014064784.1	LOC106610136	zinc finger protein 33A-like	protein_coding	ssa08	8218784	8220499	+
gene16975:106610079	-1.62701	1.04053	41.6428	1.54838e-09	6.15563e-08	XP_014064706.1	LOC106610079	zinc finger protein rotund-like	protein_coding	ssa08	8241874	8266194	-
gene16976:106610117	-1.33359	0.157441	17.5073	4.94367e-05	0.000418978	XP_014064763.1	LOC106610117	zinc finger protein 235-like	protein_coding	ssa08	8268127	8270147	-
gene16978:106610056	-1.16561	1.09645	22.7424	4.47425e-06	5.5197e-05	XP_014064653.1	LOC106610056	zinc finger protein 271-like	protein_coding	ssa08	8292637	8300477	-
gene16990:106610093	-1.37064	0.240447	18.9914	2.47585e-05	0.00023447	XP_014064731.1	LOC106610093	zinc finger protein 681-like	protein_coding	ssa08	8481807	8485285	-
gene16992:106610134	-1.47071	1.52404	40.1306	2.83003e-09	1.02872e-07					ssa08	8517544	8518958	-
gene16998:106610080	1.08781	2.92251	17.9681	3.98461e-05	0.000349474	XP_014064710.1	LOC106610080	zinc finger and BTB domain-containing protein 16-like	protein_coding	ssa08	8660631	8680856	-
gene16999:106610125	-1.16781	-0.194899	10.3697	0.0015821	0.00749146	XP_014064771.1	LOC106610125	B-cell CLL/lymphoma 6 member B protein-like	protein_coding	ssa08	8682891	8687750	-
gene17013:106610077	-1.19559	1.20702	23.7087	2.90263e-06	3.839e-05					ssa08	8949480	8970396	-
gene17014:106610112	-1.24227	1.51861	43.7557	6.72645e-10	2.98522e-08	XP_014064756.1	LOC106610112	zinc finger and BTB domain-containing protein 20-like	protein_coding	ssa08	9001189	9009335	+
gene17016:106610123	-1.30266	1.20918	19.3763	2.07235e-05	0.000202179	XP_014064768.1	LOC106610123	B-cell CLL/lymphoma 6 member B protein-like	protein_coding	ssa08	9196277	9202466	-
gene17017:106610121	-1.19242	-0.0872071	9.80893	0.00210226	0.00943224	XP_014064766.1	LOC106610121	zinc finger protein 302-like	protein_coding	ssa08	9212544	9214484	-
gene17020:106610141	-1.14141	0.442257	14.3488	0.000222128	0.00147007	XP_014064791.1	LOC106610141	zinc finger protein 813-like	protein_coding	ssa08	9221008	9229909	-
gene17025:106610116	-1.55437	1.1024	40.2676	2.67892e-09	9.80087e-08	XP_014064761.1	LOC106610116	zinc finger protein 629-like	protein_coding	ssa08	9283348	9445659	+
gene17030:106610114	-1.50559	0.924962	40.7322	2.22488e-09	8.38368e-08	XP_014064759.1	LOC106610114	zinc finger protein 205-like	protein_coding	ssa08	9346270	9355127	+
gene17033:106610082	-1.09289	1.79346	27.83	4.74116e-07	8.21826e-06					ssa08	9384747	9409043	+
gene17035:106610144	-1.18999	0.726113	19.3442	2.10325e-05	0.000204781	XP_014064796.1	LOC106610144	uncharacterized LOC106610144	protein_coding	ssa08	9465541	9472552	+
gene17038:106610119	-1.08444	0.771543	14.902	0.00017018	0.00118276	XP_014064765.1	LOC106610119	zinc finger protein 850-like	protein_coding	ssa08	9552202	9564223	+
gene17040:106610132	-1.08997	1.33756	25.9777	1.06342e-06	1.6411e-05	XP_014064781.1	LOC106610132	oocyte zinc finger protein XlCOF8.4-like	protein_coding	ssa08	9622835	9624797	+
gene17041:106610068	-1.41849	1.01872	29.0436	2.80846e-07	5.30988e-06	XP_014064678.1	LOC106610068	zinc finger protein 184-like	protein_coding	ssa08	9626081	9644411	+
gene17042:106610137	-1.50556	1.46616	38.5319	5.386e-09	1.78924e-07	XP_014064787.1	LOC106610137	uncharacterized LOC106610137	protein_coding	ssa08	9674904	9678394	+
gene17045:106610128	-1.03704	1.05171	15.544	0.00012514	0.000912114	XP_014064774.1	LOC106610128	zinc finger protein 235-like	protein_coding	ssa08	9710880	9719167	+
gene17048:106610091	-1.10627	0.820563	21.0533	9.6071e-06	0.000105523	XP_014064728.1	LOC106610091	oocyte zinc finger protein XlCOF7.1-like	protein_coding	ssa08	9761787	9774596	+
gene17084:100196870	-1.09283	3.86877	47.3846	1.64469e-10	8.76591e-09	NP_001135364.1	xtp3a	XTP3-transactivated gene A protein homolog	protein_coding	ssa08	12670653	12671830	-	DCTPP1
gene17090:106610178	1.43291	3.25802	13.1746	0.000394434	0.0023769	XP_014064845.1	LOC106610178	lipopolysaccharide-responsive and beige-like anchor protein	protein_coding	ssa08	12806976	12920607	+	LRBA
gene17148:100380732	1.38039	2.11279	21.9349	6.43916e-06	7.52032e-05	XP_014064938.1	LOC100380732	GRB2-associated-binding protein 1	protein_coding	ssa08	15681685	15752335	+
gene17163:106610255	1.24334	1.02494	18.3273	3.37019e-05	0.000304312	XP_014064975.1	LOC106610255	coronin-2A-like	protein_coding	ssa08	16191457	16207611	-	CORO2A
gene17210:106610304	-1.79172	1.16859	51.8256	3.04941e-11	2.09576e-09	XP_014065059.1	LOC106610304	group XIIA secretory phospholipase A2-like	protein_coding	ssa08	17584734	17587571	+	PLA2G12A
gene17249:106610325	-1.21215	0.580254	18.278	3.44834e-05	0.000309967	XP_014065087.1	LOC106610325	PERQ amino acid-rich with GYF domain-containing protein 2-like	protein_coding	ssa08	18953130	18974417	-	CALCOCO2
gene17262:106610353	1.83243	2.50595	26.1869	9.73925e-07	1.51678e-05	XP_014065145.1	LOC106610353	rho guanine nucleotide exchange factor 38-like	protein_coding	ssa08	19493778	19504072	+	ARHGEF38
gene17263:106610358	1.37737	2.32841	50.0027	6.05971e-11	3.73382e-09	XP_014065148.1	LOC106610358	rho guanine nucleotide exchange factor 38-like	protein_coding	ssa08	19504098	19506177	+	ARHGEF38
gene17315:106610378	-1.29418	1.89402	47.8576	1.37175e-10	7.47549e-09	XP_014065183.1	LOC106610378	zinc finger protein OZF-like	protein_coding	ssa08	20189461	20192830	+
gene17322:106610387	-1.05386	2.79697	39.1904	4.12879e-09	1.42746e-07	XP_014065205.1	LOC106610387	zinc finger protein with KRAB and SCAN domains 1-like	protein_coding	ssa08	20248968	20257126	+
gene17388:106610440	1.15679	1.07795	17.3538	5.31289e-05	0.000444499	XP_014065289.1	LOC106610440	dual specificity testis-specific protein kinase 2-like	protein_coding	ssa08	22453635	22471674	-
gene17458:106610501	1.22615	-0.113181	10.0722	0.00183911	0.00847101	XP_014065356.1	LOC106610501	uncharacterized LOC106610501	protein_coding	ssa08	24481450	24486832	+
gene17593:106610653	-1.26742	1.71545	28.3121	3.84872e-07	6.89905e-06	XP_014065568.1	iqcc	IQ motif containing C	protein_coding	ssa09	6788460	6795740	+	IQCC
gene17615:106610673	1.42075	5.01985	25.8974	1.11569e-06	1.70857e-05	XP_014065596.1	LOC106610673	leucine zipper protein 1-like	protein_coding	ssa09	8549288	8646219	+	LUZP1
gene17634:100379103	-1.16645	2.2611	34.8631	2.41552e-08	6.56074e-07	NP_001165957.1	LOC100379103	akirin 2(2a)	protein_coding	ssa09	9274905	9283138	+
gene17666:106610718	-1.13895	4.74631	40.705	2.25413e-09	8.45635e-08	XP_014065701.1	LOC106610718	zinc finger protein 395-like	protein_coding	ssa09	11580806	11608162	+	ZNF395
gene177:106608351	1.51941	1.46885	30.921	1.25981e-07	2.65829e-06	XP_014061828.1	LOC106608351	bromo adjacent homology domain-containing 1 protein-like	protein_coding	ssa01	7636894	7672047	+
gene17706:106610758	1.15626	2.08715	16.3026	8.72353e-05	0.000673426					ssa09	14013752	14015503	+
gene17780:106610828	-2.51764	-0.244352	33.5042	4.2484e-08	1.05824e-06	XP_014065916.1	LOC106610828	zinc finger protein 180-like	protein_coding	ssa09	17887555	17889469	+	ZNF180
gene17785:106610894	1.06568	8.23552	85.6874	2.62062e-16	8.01554e-14	XP_014066033.1	LOC106610894	arginine/serine-rich protein 1-like	protein_coding	ssa09	18137006	18140285	-	RSRP1
gene17803:106610884	-2.05652	0.0705535	29.027	2.82853e-07	5.33508e-06					ssa09	18818120	18820330	+
gene17805:106610883	-1.1875	1.99662	29.2209	2.60256e-07	4.98081e-06					ssa09	18864436	18872698	+
gene17810:106610880	-1.04561	0.4967	13.0785	0.000411855	0.00246555	XP_014066006.1	LOC106610880	coiled-coil domain-containing protein 28B-like	protein_coding	ssa09	18924372	18930644	+
gene17822:106610868	-1.2919	2.24946	56.6549	5.10623e-12	4.32323e-10					ssa09	19257485	19265705	-
gene17823:106610825	-1.25256	0.224029	9.99813	0.00190955	0.00873855					ssa09	19265948	19268923	+
gene17824:106610867	-1.34552	2.84384	58.0577	3.06442e-12	2.73071e-10					ssa09	19269007	19283892	+
gene17826:106610909	-1.68278	-0.213418	13.5883	0.000321156	0.00199983					ssa09	19314793	19316871	-
gene17851:106610840	1.43498	2.47625	28.6069	3.38915e-07	6.19629e-06	XP_014065933.1	LOC106610840	formin-like	protein_coding	ssa09	20096325	20199381	-	FMN1
gene17884:106611061	1.71548	2.09496	18.3888	3.28194e-05	0.000297372	XP_014066387.1	LOC106611061	latent-transforming growth factor beta-binding protein 2-like	protein_coding	ssa09	21855246	22009377	-	LTBP2
gene17896:106611048	-1.05617	1.93524	32.5847	6.24251e-08	1.45592e-06	XP_014066353.1	ift43	intraflagellar transport 43	protein_coding	ssa09	22390984	22433652	-	IFT43
gene17911:106611037	-1.18953	2.35973	40.6965	2.25684e-09	8.45718e-08	XP_014066330.1	LOC106611037	tetratricopeptide repeat protein 8-like	protein_coding	ssa09	22683700	22689361	-	TTC8
gene17920:106611031	3.31521	3.22121	113.226	6.92102e-20	4.3514e-17	XP_014066318.1	LOC106611031	ectonucleoside triphosphate diphosphohydrolase 5-like	protein_coding	ssa09	22830680	22843733	+	ENTPD5
gene17929:106611024	-1.35868	2.17426	61.4662	8.99945e-13	9.60819e-11	XP_014066300.1	LOC106611024	N-alpha-acetyltransferase 30-like	protein_coding	ssa09	23107183	23113037	-	NAA30
gene17941:106611013	-1.00704	4.83492	35.7237	1.69375e-08	4.84862e-07					ssa09	23588336	23590249	+
gene17999:106610964	1.20078	2.67149	16.5704	7.68953e-05	0.000607982	XP_014066184.1	LOC106610964	protein jagged-2-like	protein_coding	ssa09	25763866	25799811	-	JAG2
gene18025:106610945	-1.06314	1.7486	27.7805	4.84407e-07	8.36526e-06					ssa09	26474365	26479037	+
gene18040:106610930	-1.21363	3.02713	22.1388	5.87341e-06	6.94098e-05	XP_014066087.1	LOC106610930	gamma-aminobutyric acid receptor subunit alpha-2-like	protein_coding	ssa09	26884389	26923195	-	GABRA2
gene18047:106611136	-3.39706	7.95682	121.401	8.19526e-21	6.32357e-18	XP_014066501.1	LOC106611136	ornithine decarboxylase 1-like	protein_coding	ssa09	27129401	27134433	-	ODC1
gene18049:106611134	-2.24348	-0.409121	21.348	8.40177e-06	9.41104e-05	XP_014066500.1	LOC106611134	potassium voltage-gated channel subfamily F member 1-like	protein_coding	ssa09	27187142	27189897	+	KCNF1
gene18079:100196283	1.19045	1.15665	11.0764	0.00110898	0.00560366	XP_014066512.1	LOC100196283	vam6/Vps39-like protein	protein_coding	ssa09	29216962	29220329	-	VPS39
gene18134:106611221	1.47804	3.78917	70.2261	4.24479e-14	6.58059e-12	XP_014066672.1	LOC106611221	gap junction beta-4 protein-like	protein_coding	ssa09	32632038	32634984	+
gene18150:106611204	1.75982	-0.595438	16.8473	6.74293e-05	0.000545199	XP_014066647.1	LOC106611204	uncharacterized LOC106611204	protein_coding	ssa09	33225138	33226378	+
gene18163:106611226	1.34883	0.300879	16.7196	7.16177e-05	0.00057279	XP_014066690.1	LOC106611226	egl nine homolog 3-like	protein_coding	ssa09	34309716	34324331	-	EGLN3
gene18180:106611240	-1.00743	3.42316	43.9192	6.30882e-10	2.82862e-08	XP_014066713.1	LOC106611240	interferon regulatory factor 2-binding protein-like	protein_coding	ssa09	34750794	34753875	+	IRF2BPL
gene18182:106611242	-1.1829	1.55404	20.771	1.09263e-05	0.000117466	XP_014066714.1	LOC106611242	dapper homolog 1-like	protein_coding	ssa09	34834003	34919964	+	DACT1
gene18198:106611259	-1.05636	2.69416	16.6374	7.44531e-05	0.000591461					ssa09	36190373	36203056	+
gene18221:106611278	1.02911	2.5629	11.5707	0.000866768	0.00457377	XP_014066791.1	LOC106611278	stAR-related lipid transfer protein 9-like	protein_coding	ssa09	38412378	38477342	-
gene18276:106611320	-1.22719	-0.140292	10.4004	0.0015578	0.00738981	XP_014066861.1	ddo	D-aspartate oxidase	protein_coding	ssa09	40673016	40687047	+	DDO
gene1833:106611887	1.00877	2.59333	25.8609	1.11937e-06	1.71342e-05	XP_014068005.1	LOC106611887	inward rectifier potassium channel 2-like	protein_coding	ssa01	97658631	97666708	-	KCNJ2
gene18338:106611390	2.15251	-0.565699	20.2045	1.41581e-05	0.000146818					ssa09	43851406	43853852	-
gene18345:106611397	-3.24581	1.49912	22.3835	5.31042e-06	6.37532e-05	XP_014067042.1	LOC106611397	uncharacterized LOC106611397	protein_coding	ssa09	44034491	44039519	+
gene18362:106611413	-1.22894	2.43784	28.1669	4.09792e-07	7.27631e-06	XP_014067075.1	LOC106611413	uncharacterized LOC106611413	protein_coding	ssa09	44893536	44904020	-
gene1839:106611860	-1.38137	1.6793	39.5943	3.50949e-09	1.23986e-07	XP_014067950.1	LOC106611860	fatty acid desaturase 6-like	protein_coding	ssa01	97992967	98017748	-	FADS6
gene1840:106611846	-1.69434	-0.585254	10.9523	0.00118012	0.00589729	XP_014067923.1	LOC106611846	Usher syndrome type-1G protein homolog	protein_coding	ssa01	98020411	98046421	-	USH1G
gene1842:106611807	1.13818	3.48314	9.96713	0.00194411	0.00885728	XP_014067871.1	LOC106611807	vinculin	protein_coding	ssa01	98117155	98190308	+	VCL
gene18428:106611476	1.0917	4.20828	27.1724	6.32345e-07	1.05033e-05	XP_014067191.1	trip11	thyroid hormone receptor interactor 11	protein_coding	ssa09	47564113	47625344	+	TRIP11
gene18431:106611478	1.60685	1.31956	16.046	9.85347e-05	0.000746231	XP_014067192.1	LOC106611478	zinc finger FYVE domain-containing protein 26-like	protein_coding	ssa09	47690203	47726045	+	ZFYVE26
gene18572:106611586	3.01637	3.09406	35.6137	1.81331e-08	5.14317e-07	XP_014067429.1	elovl6	ELOVL fatty acid elongase 6	protein_coding	ssa09	55593209	55614866	-	ELOVL6
gene18587:100194694	1.19098	6.78195	70.9438	3.32436e-14	5.47889e-12	NP_001133225.1	sqstm1	sequestosome 1	protein_coding	ssa09	57398593	57402585	-	SQSTM1
gene1865:106613597	1.1799	1.43643	10.6234	0.00139215	0.00674827	XP_014071511.1	slc35f3	solute carrier family 35%2C member F3	protein_coding	ssa01	99940389	100065460	+	SLC35F3
gene18655:106611661	-1.87032	0.788463	29.4676	2.34126e-07	4.54738e-06	XP_014067577.1	LOC106611661	zinc finger protein 583-like	protein_coding	ssa09	60688031	60697802	-
gene18700:106611779	1.29469	0.872319	13.1217	0.000403243	0.0024231	XP_014067816.1	LOC106611779	fibrous sheath CABYR-binding protein-like	protein_coding	ssa09	62788582	62806773	-	MGARP
gene18795:106611714	-1.0215	2.63092	15.1709	0.000149587	0.00105761	XP_014067687.1	LOC106611714	membrane transport protein XK-like	protein_coding	ssa09	65206981	65216276	+	XKRX
gene18817:106611698	-1.22196	0.705991	17.8784	4.15519e-05	0.000361818	XP_014067652.1	LOC106611698	zinc finger and BTB domain-containing protein 5-like	protein_coding	ssa09	65621566	65625743	-	ZBTB5
gene18819:106611696	-1.19948	0.563402	15.4955	0.000128072	0.000930058	XP_014067649.1	LOC106611696	FERM and PDZ domain-containing protein 1-like	protein_coding	ssa09	65628994	65660779	+	FRMPD1
gene18872:106611857	1.16901	2.6212	10.4878	0.00149217	0.00713652	XP_014067934.1	LOC106611857	protein diaphanous homolog 1-like	protein_coding	ssa09	67235604	67292995	-	DIAPH1
gene18891:106611894	-1.29733	0.615647	24.0492	2.49393e-06	3.36665e-05	XP_014068013.1	LOC106611894	zinc finger protein 782-like	protein_coding	ssa09	67732147	67733932	-
gene1893:106613820	1.53482	1.89465	13.0179	0.000424804	0.0025272	XP_014071944.1	papolg	poly(A) polymerase gamma	protein_coding	ssa01	101539836	101557178	+	PAPOLG
gene18944:106611936	1.37562	1.80837	10.2398	0.0016909	0.00791396	XP_014068095.1	LOC106611936	C-terminal-binding protein 1-like	protein_coding	ssa09	69667082	69688477	+
gene18957:106611923	2.3806	2.52013	62.202	6.92719e-13	7.61116e-11	XP_014068061.1	LOC106611923	peroxisome proliferator-activated receptor gamma coactivator 1-beta-like	protein_coding	ssa09	70602976	70697546	-	PPARGC1B
gene18991:106611988	1.66504	2.21482	66.7325	1.41233e-13	1.88039e-11	XP_014068208.1	LOC106611988	LON peptidase N-terminal domain and RING finger protein 3-like	protein_coding	ssa09	72478129	72484804	+	LONRF3
gene18995:106611959	1.67906	-0.683961	10.8636	0.00123381	0.00611787	XP_014068153.1	LOC106611959	AF4/FMR2 family member 2-like	protein_coding	ssa09	72643236	72932550	-	AFF2
gene19033:106612016	-1.00212	3.0468	33.1894	4.84539e-08	1.17925e-06	XP_014068259.1	LOC106612016	centromere protein U-like	protein_coding	ssa09	74985106	74992117	+	CENPU
gene19074:106612058	1.1457	1.79337	16.0686	9.7479e-05	0.000739412	XP_014068350.1	LOC106612058	LON peptidase N-terminal domain and RING finger protein 1-like	protein_coding	ssa09	76365028	76389639	-
gene19078:106612062	-1.00986	2.16652	22.7513	4.45637e-06	5.50175e-05	XP_014068355.1	LOC106612062	lymphocyte cytosolic protein 2-like	protein_coding	ssa09	76630552	76639742	-
gene19122:106612116	1.27782	5.36646	50.5087	5.05267e-11	3.23057e-09	XP_014068477.1	psd2	pleckstrin and Sec7 domain containing 2	protein_coding	ssa09	77750540	77810176	-	PSD2
gene19123:106612115	-1.23332	0.724427	19.4799	1.97564e-05	0.00019442	XP_014068476.1	LOC106612115	SH2 domain-containing protein 4A-like	protein_coding	ssa09	77833358	77840443	+
gene19124:106612113	1.05714	1.8503	26.455	8.62726e-07	1.36935e-05	XP_014068472.1	cxxc5	CXXC finger protein 5	protein_coding	ssa09	77844347	77849490	-
gene19252:106612245	-1.12623	4.33814	78.0526	3.08746e-15	6.8962e-13	XP_014068709.1	LOC106612245	serine/threonine-protein phosphatase 2A catalytic subunit alpha isoform-like	protein_coding	ssa09	84333166	84340514	-	PPP2CA
gene1928:106560244	1.46708	-0.58691	9.77114	0.00214308	0.00957303	XP_013978417.1	col19a1	collagen%2C type XIX%2C alpha 1	protein_coding	ssa01	103015664	103247617	-
gene19280:106612265	2.0647	7.6619	143.993	1.89095e-23	2.67315e-20	XP_014068743.1	LOC106612265	TSC22 domain family protein 3-like	protein_coding	ssa09	85873453	85920619	+	TSC22D3
gene19300:100286545	-1.416	0.936938	25.1013	1.56421e-06	2.25696e-05	XP_014068781.1	tmm80	Transmembrane protein 80	protein_coding	ssa09	88463822	88468427	-	TMEM216
gene19306:106612291	2.26058	0.651028	12.0582	0.000680357	0.00373706	XP_014068796.1	LOC106612291	PCTP-like protein	protein_coding	ssa09	88604026	88624092	-	STARD10
gene19396:100194513	1.01683	1.90089	9.90488	0.00200215	0.00906864	XP_014068920.1	rtn2	reticulon 2	protein_coding	ssa09	93817131	93830711	-	RTN2
gene19409:106612386	1.56483	-0.304559	12.4098	0.000571915	0.00323618	XP_014068945.1	LOC106612386	probable zinc transporter protein DDB_G0282067	protein_coding	ssa09	94246160	94251473	+
gene19414:106612392	1.35984	1.96042	11.7533	0.000792076	0.0042416	XP_014068957.1	LOC106612392	striatin-4-like	protein_coding	ssa09	94367720	94379804	-
gene19431:106612409	-1.13513	1.47803	34.4021	2.92391e-08	7.71926e-07					ssa09	95121034	95140489	+
gene19475:106612460	2.28945	4.60183	111.87	1.04881e-19	6.47419e-17	XP_014069081.1	sik2	salt-inducible kinase 2	protein_coding	ssa09	97462412	97529827	-	SIK2
gene1951:106560445	-1.24392	1.72853	29.7043	2.11566e-07	4.15917e-06	XP_013978837.1	LOC106560445	breast cancer metastasis-suppressor 1 homolog	protein_coding	ssa01	104474835	104496690	-	BRMS1
gene19537:106612723	-1.09747	0.311998	14.4095	0.000215711	0.00143783	XP_014069647.1	LOC106612723	zinc finger protein 36%2C C3H1 type-like 1	protein_coding	ssa09	100790059	100793674	-
gene1954:106560466	-1.0819	1.15741	20.3303	1.33649e-05	0.000139573	XP_013978896.1	LOC106560466	gastrula zinc finger protein XlCGF57.1-like	protein_coding	ssa01	104545430	104592333	+
gene19554:106612708	2.21429	-0.803746	19.657	1.82079e-05	0.000181443	XP_014069609.1	LOC106612708	spectrin beta chain%2C non-erythrocytic 4-like	protein_coding	ssa09	101725431	101801173	-	SPTBN4
gene19567:106612694	-1.28985	3.00603	85.8544	2.48532e-16	7.67082e-14	XP_014069589.1	LOC106612694	G-protein coupled receptor 4-like	protein_coding	ssa09	102038492	102063188	-	GPR4
gene19595:106612670	1.86077	-0.270023	14.1909	0.000239745	0.00156923	XP_014069545.1	LOC106612670	GTPase IMAP family member 4-like	protein_coding	ssa09	102743986	102746293	+
gene19688:106612521	1.14942	3.82287	28.9364	2.94544e-07	5.50453e-06	XP_014069199.1	LOC106612521	zinc finger CCCH domain-containing protein 4-like	protein_coding	ssa09	106036763	106054227	+	ZC3H4
gene19810:100196030	-1.15537	1.9415	38.5116	5.43028e-09	1.80218e-07	NP_001134531.1	dus14	Dual specificity protein phosphatase 14	protein_coding	ssa09	110033223	110034110	-
gene19846:106612856	1.66402	0.0534365	29.1466	2.6869e-07	5.11339e-06	XP_014069906.1	LOC106612856	sterile alpha and TIR motif-containing protein 1-like	protein_coding	ssa09	111578820	111592524	+	SARM1
gene19858:106612846	-4.9484	-0.67224	36.4178	1.27357e-08	3.83325e-07	XP_014069894.1	LOC106612846	tumor suppressor candidate 5 homolog	protein_coding	ssa09	111876725	111890808	-	TUSC5
gene19906:106612804	-1.93049	1.31538	72.6344	1.87535e-14	3.31614e-12	XP_014069794.1	LOC106612804	diablo homolog%2C mitochondrial-like	protein_coding	ssa09	113411903	113416219	-	DIABLO
gene19913:106612803	-1.63906	1.23397	36.2311	1.37489e-08	4.05904e-07					ssa09	113520905	113528519	+
gene19940:106612915	-1.74825	-0.494264	17.6232	4.68236e-05	0.000399926					ssa09	114192496	114195497	-
gene19970:106613028	1.60916	-0.444442	13.0708	0.000413412	0.00247195	XP_014070370.1	LOC106613028	zinc finger and BTB domain-containing protein 16-A-like	protein_coding	ssa09	115382500	115430291	-	ZBTB16
gene19986:106613013	1.50607	6.39753	68.8858	6.85064e-14	9.77253e-12	XP_014070315.1	LOC106613013	heat shock cognate 70 kDa protein-like	protein_coding	ssa09	116177316	116193396	-	HSPA8
gene20026:106612982	-1.06018	4.10087	59.1278	2.08104e-12	2.00151e-10	XP_014070232.1	LOC106612982	trafficking protein particle complex subunit 4	protein_coding	ssa09	117283592	117285098	+	TRAPPC4
gene20042:106612968	-2.20998	0.290035	33.5317	4.19985e-08	1.04845e-06	XP_014070194.1	LOC106612968	homeobox protein BarH-like 2	protein_coding	ssa09	117902234	117917776	+	BARX2
gene20064:106612954	1.09079	5.62978	38.6752	5.11369e-09	1.71513e-07	XP_014070143.1	LOC106612954	serine/threonine-protein kinase ULK2-like	protein_coding	ssa09	119648877	119722196	-	ULK2
gene20093:106613079	-1.10999	2.71976	48.7585	9.72163e-11	5.57503e-09	XP_014070449.1	lyrm9	LYR motif containing 9	protein_coding	ssa09	121440168	121441980	-	LYRM9
gene20174:106613164	1.0302	3.71533	16.7503	7.0722e-05	0.000567115	XP_014070628.1	LOC106613164	ephexin-1-like	protein_coding	ssa09	127179750	127205263	-	NGEF
gene20229:106613218	1.17952	2.40716	12.4668	0.000556443	0.00316393	XP_014070734.1	LOC106613218	arf-GAP with Rho-GAP domain%2C ANK repeat and PH domain-containing protein 1-like	protein_coding	ssa09	130545515	130588202	-
gene20248:106613235	2.51857	1.86457	32.7967	5.74931e-08	1.35835e-06	XP_014070778.1	LOC106613235	F-BAR and double SH3 domains protein 2-like	protein_coding	ssa09	131426071	131442683	+	FCHSD2
gene20327:106613316	1.45438	1.84318	13.8765	0.000279349	0.00178846	XP_014070884.1	LOC106613316	homeobox protein cut-like 1	protein_coding	ssa09	136318129	136378932	-
gene2035:106561271	-1.10733	1.59605	27.0215	6.73674e-07	1.11137e-05	XP_013980510.1	LOC106561271	UPF0729 protein C18orf32 homolog	protein_coding	ssa01	109006039	109017160	-
gene20389:106613377	1.31419	4.70715	14.4338	0.000214419	0.0014319	XP_014071014.1	LOC106613377	EH domain-containing protein 2-like	protein_coding	ssa09	138615078	138653406	+	EHD2
gene20440:106613425	2.85798	-0.860532	15.3551	0.000136959	0.000983505	XP_014071089.1	LOC106613425	protein Jade-3-like	protein_coding	ssa10	1052844	1055097	+	JADE3
gene20449:106613437	1.1631	2.99535	14.4233	0.000214593	0.00143277	XP_014071103.1	lpar3	lysophosphatidic acid receptor 3	protein_coding	ssa10	1393709	1406145	+
gene20594:106613585	1.69574	1.70704	15.5685	0.000123884	0.00090432	XP_014071475.1	LOC106613585	roquin-1-like	protein_coding	ssa10	13326718	13354233	+
gene2066:100195612	-1.05649	2.61506	33.226	4.77192e-08	1.16723e-06	NP_001134113.1	swi5	SWI5 homologous recombination repair protein	protein_coding	ssa01	110378682	110381447	-	SWI5
gene20716:106613695	1.62132	2.15275	22.9242	4.12795e-06	5.14871e-05	XP_014071701.1	LOC106613695	lipoprotein lipase-like	protein_coding	ssa10	17003399	17013170	-	LPL
gene20721:106613697	1.10471	5.42979	74.0302	1.17308e-14	2.17636e-12	XP_014071702.1	LOC106613697	hematopoietic SH2 domain-containing protein homolog	protein_coding	ssa10	17107612	17111199	+
gene2077:106561687	1.00946	3.70494	33.5237	4.21391e-08	1.05041e-06	XP_013981362.1	LOC106561687	roquin-2-like	protein_coding	ssa01	111107596	111130344	-	RC3H2
gene20799:106613773	1.47423	1.80805	19.5149	1.94398e-05	0.000191917	XP_014071853.1	LOC106613773	zinc finger and BTB domain-containing protein 7A-like	protein_coding	ssa10	20044272	20068069	-
gene20824:106613792	1.29952	3.41835	25.6298	1.2427e-06	1.86521e-05	XP_014071883.1	LOC106613792	SHC-transforming protein 2-like	protein_coding	ssa10	20754281	20778781	+	SHC2
gene20826:100196527	1.01605	1.15174	11.7005	0.000812398	0.00433266	XP_014071886.1	LOC100196527	SH2 domain-containing adapter protein D	protein_coding	ssa10	20802889	20830591	+	SHD
gene20831:106613796	-1.57812	2.68124	76.1524	5.78234e-15	1.18979e-12	XP_014071887.1	LOC106613796	mesoderm induction early response protein 2-like	protein_coding	ssa10	20916620	20935417	+	MIER2
gene20852:106613816	1.02626	3.98151	32.3475	6.89658e-08	1.58743e-06	XP_014071929.1	LOC106613816	nuclear receptor ROR-beta-like	protein_coding	ssa10	21619455	21646154	-
gene2090:106561770	1.27009	4.33764	41.7635	1.48153e-09	5.91063e-08	XP_013981487.1	LOC106561770	ras-GEF domain-containing family member 1B-B-like	protein_coding	ssa01	111439079	111447296	-	RASGEF1B
gene20940:106614019	-2.32968	-0.0575765	40.5951	2.35006e-09	8.73896e-08	XP_014072386.1	LOC106614019	39S ribosomal protein L55%2C mitochondrial-like	protein_coding	ssa10	24619347	24629538	+	MRPL55
gene21079:106560267	1.41851	3.75289	101.769	1.89152e-18	9.17415e-16	XP_013978451.1	LOC106560267	ras-like protein family member 11B	protein_coding	ssa10	30703862	30706896	+	RASL11B
gene21108:106560290	1.79025	3.90591	120.855	8.18945e-21	6.32357e-18	XP_013978517.1	LOC106560290	UDP-N-acetylhexosamine pyrophosphorylase-like	protein_coding	ssa10	31825517	31857157	-	UAP1
gene21124:106560302	1.91522	4.78824	99.9342	3.32328e-18	1.46531e-15	XP_013978530.1	LOC106560302	regulator of G-protein signaling 21-like	protein_coding	ssa10	33264870	33270401	+	RGS2
gene21150:106560326	-1.66905	4.688	146.713	9.39744e-24	1.5193e-20	XP_013978610.1	LOC106560326	growth arrest and DNA damage-inducible protein GADD45 alpha-like	protein_coding	ssa10	34535605	34538610	-	GADD45A
gene21187:106560380	2.23651	-0.706025	14.7425	0.000183732	0.00126043	XP_013978727.1	LOC106560380	rho GTPase-activating protein 39-like	protein_coding	ssa10	37183759	37363232	+	ARHGAP39
gene21199:106560371	1.22572	1.3674	14.4295	0.000213643	0.00142727	XP_013978707.1	LOC106560371	forkhead box protein F2-like	protein_coding	ssa10	37812094	37817207	-	FOXF2
gene21210:101448057	1.2249	1.0102	12.1579	0.000647624	0.00359142	NP_001266069.1	igfbp-1a1	insulin-like growth factor binding protein 1 paralog A1	protein_coding	ssa10	38367407	38369429	+	IGFBP1
gene21216:106560403	-1.27519	4.1813	103.541	1.12091e-18	5.67999e-16	XP_013978763.1	cssa10h8orf82	chromosome ssa10 open reading frame%2C human C8orf82	protein_coding	ssa10	38653966	38660478	+	C8orf82
gene2129:100194813	-1.66443	-0.519761	15.9328	0.000103978	0.000779802	NP_001133314.1	bmcc1	BNIP2 motif-containing molecule at the C-terminal region 1	protein_coding	ssa01	113609563	113622436	-
gene21301:106560488	1.13539	3.0766	14.7738	0.000181244	0.00124639	XP_013978928.1	LOC106560488	dedicator of cytokinesis protein 7-like	protein_coding	ssa10	43031069	43057993	+	DOCK7
gene21328:106560518	-2.02595	2.38023	69.7488	4.99655e-14	7.5061e-12	XP_013978965.1	LOC106560518	leucine-rich repeat-containing protein 19-like	protein_coding	ssa10	44255706	44272393	-
gene21338:106560529	1.38893	4.85836	31.9264	8.34373e-08	1.86736e-06	XP_013978978.1	LOC106560529	phosphatidylinositol 3-kinase regulatory subunit gamma-like	protein_coding	ssa10	44850901	44883143	+	PIK3R3
gene21339:106560530	1.01473	3.54908	11.7643	0.00078843	0.00422608	XP_013978979.1	LOC106560530	microtubule-associated serine/threonine-protein kinase 2-like	protein_coding	ssa10	44986557	45217302	-	MAST2
gene21377:106560572	-1.33819	1.96783	51.8949	2.97119e-11	2.05448e-09	XP_013979054.1	gtpbp3	GTP binding protein 3 (mitochondrial)	protein_coding	ssa10	47531117	47563315	+	GTPBP3
gene21378:106560573	1.42803	-0.00203881	11.9771	0.000708247	0.00385904	XP_013979056.1	plvap	plasmalemma vesicle associated protein	protein_coding	ssa10	47571382	47576388	-	PLVAP
gene21390:106560584	1.57605	5.40492	22.9704	4.09497e-06	5.11321e-05	XP_013979089.1	mfi2	antigen p97 (melanoma associated) identified by monoclonal antibodies 133.2 and 96.5	protein_coding	ssa10	48389226	48402147	+	MFI2
gene21402:106560593	1.31864	3.6796	44.5278	4.97256e-10	2.31265e-08	XP_013979104.1	LOC106560593	transmembrane 4 L6 family member 1-like	protein_coding	ssa10	48709208	48718590	-	TM4SF1
gene21410:106560600	1.65379	3.53869	29.3601	2.47566e-07	4.77949e-06	XP_013979117.1	LOC106560600	rho guanine nucleotide exchange factor 18-like	protein_coding	ssa10	48950855	49033397	-
gene21411:106560567	1.02098	1.63081	15.3208	0.000139225	0.00099659	XP_013979040.1	LOC106560567	insulin receptor-like	protein_coding	ssa10	49048315	49112142	-	INSR
gene21423:106560616	1.57268	1.50522	30.9592	1.23955e-07	2.62205e-06	XP_013979139.1	LOC106560616	solute carrier organic anion transporter family member 2A1-like	protein_coding	ssa10	50011021	50052364	+	SLCO2A1
gene21430:106560622	1.27054	2.96207	33.2628	4.69899e-08	1.15271e-06	XP_013979150.1	LOC106560622	zinc finger and BTB domain-containing protein 11-like	protein_coding	ssa10	50427043	50440198	+	ZBTB11
gene2156:106562340	-1.02393	3.86106	70.4658	3.91172e-14	6.20592e-12	XP_013982634.1	LOC106562340	transmembrane protein 150C-like	protein_coding	ssa01	114478064	114481818	+	TMEM150C
gene21564:106560790	1.35218	2.405	11.6602	0.00082999	0.00441331	XP_013979536.1	cspg4	chondroitin sulfate proteoglycan 4	protein_coding	ssa10	62313169	62434959	+	CSPG4
gene21609:106560750	1.26598	2.99208	11.9803	0.000708765	0.00386125	XP_013979434.1	LOC106560750	zinc finger protein 609-like	protein_coding	ssa10	64880296	65077209	+	ZNF609
gene21652:106561067	-1.13375	1.68027	36.4507	1.25651e-08	3.78861e-07	XP_013980157.1	ric3	RIC3 acetylcholine receptor chaperone	protein_coding	ssa10	67063298	67072130	-	RIC3
gene21663:106561069	-1.16219	3.70034	62.6761	5.85528e-13	6.51779e-11	XP_013980163.1	LOC106561069	protein FAM60A-like	protein_coding	ssa10	67321197	67328572	+	FAM60A
gene21673:106561047	-1.27372	0.205404	12.0342	0.000688508	0.0037666	XP_013980099.1	LOC106561047	ATP-sensitive inward rectifier potassium channel 11-like	protein_coding	ssa10	67612085	67614488	+	KCNJ11
gene217:106560243	1.29126	6.05418	83.2549	5.69728e-16	1.6119e-13	XP_013978423.1	LOC106560243	mitochondrial basic amino acids transporter-like	protein_coding	ssa01	9081979	9093865	+	SLC25A29
gene21711:106561019	1.25844	2.76501	24.1932	2.33921e-06	3.1831e-05	XP_013980042.1	LOC106561019	uncharacterized LOC106561019	protein_coding	ssa10	70598853	70604812	-	PPP1R3A
gene2175:106562568	-1.01649	1.32351	14.3516	0.000221829	0.00146838	XP_013982987.1	LOC106562568	hydroxycarboxylic acid receptor 2-like	protein_coding	ssa01	114993573	114996565	+	HCAR2
gene21752:100136415	-1.29822	4.08231	80.7625	1.2738e-15	3.29009e-13	XP_013979542.1	LOC100136415	peroxisome proliferator-activated receptor alpha	protein_coding	ssa10	72569414	72629719	+
gene21809:106560934	-1.01174	0.00931821	12.2628	0.000614936	0.00343892	XP_013979876.1	LOC106560934	uncharacterized LOC106560934	protein_coding	ssa10	75640728	75667796	+
gene21822:106560921	1.48207	3.30861	60.5664	1.24106e-12	1.26913e-10	XP_013979846.1	LOC106560921	SNF-related serine/threonine-protein kinase-like	protein_coding	ssa10	75993641	76030764	-
gene21832:106560915	-2.03504	0.533189	28.0311	4.34576e-07	7.64471e-06	XP_013979832.1	LOC106560915	C-C motif chemokine 8-like	protein_coding	ssa10	76254313	76255590	-
gene21849:106560945	-1.17668	2.75761	23.212	3.62434e-06	4.61553e-05					ssa10	76548167	76551606	-
gene21876:106560874	1.29479	1.29687	24.556	1.99112e-06	2.77506e-05	XP_013979735.1	LOC106560874	malonyl-CoA decarboxylase%2C mitochondrial-like	protein_coding	ssa10	77578419	77588850	+	MLYCD
gene21902:106560850	-1.07037	5.72373	40.1844	2.78393e-09	1.01413e-07	XP_013979698.1	LOC106560850	protein NLRC5-like	protein_coding	ssa10	79263528	79290759	-	NLRC5
gene21903:106560849	1.06375	3.83528	25.7886	1.15602e-06	1.76079e-05	XP_013979697.1	LOC106560849	cholesteryl ester transfer protein-like	protein_coding	ssa10	79299880	79318353	-	CETP
gene21937:106560819	-1.18595	0.404285	9.71327	0.00220719	0.009803	XP_013979622.1	LOC106560819	N-terminal EF-hand calcium-binding protein 2-like	protein_coding	ssa10	80533139	80686326	-	NECAB2
gene21943:106560814	-1.12459	3.39774	47.6021	1.51291e-10	8.17914e-09	XP_013979615.1	LOC106560814	synaptotagmin 1-like	protein_coding	ssa10	80848233	80851918	+
gene22067:106561244	1.1267	2.38986	26.7541	7.56998e-07	1.22392e-05	XP_013980454.1	LOC106561244	uncharacterized LOC106561244	protein_coding	ssa10	86939467	86950761	-	KCP
gene2211:106562879	-1.22288	3.94724	26.6718	7.8793e-07	1.26482e-05					ssa01	116107889	116130482	-
gene22138:106561307	-1.02231	6.27718	72.2364	2.14498e-14	3.75383e-12	XP_013980594.1	ehf	ets homologous factor	protein_coding	ssa10	90468944	90476914	-	EHF
gene22148:106561299	-1.05665	2.76225	61.6919	8.30437e-13	8.95053e-11	XP_013980570.1	rccd1	RCC1 domain containing 1	protein_coding	ssa10	92371984	92376441	+	RCCD1
gene22185:106561336	-2.72822	-0.810461	22.8909	4.18568e-06	5.21498e-05	XP_013980654.1	LOC106561336	oocyte zinc finger protein XlCOF19-like	protein_coding	ssa10	93504501	93506522	-
gene22187:106561435	-2.16956	-0.624745	18.7219	2.80534e-05	0.000260727	XP_013980877.1	LOC106561435	zinc finger protein 180-like	protein_coding	ssa10	93580985	93581623	-	ZNF180
gene22229:106561399	1.51989	2.16306	42.4346	1.13153e-09	4.67923e-08	XP_013980813.1	LOC106561399	teashirt homolog 3-like	protein_coding	ssa10	95535154	95555735	+	TSHZ3
gene22237:106561392	1.33473	2.63441	17.742	4.43389e-05	0.000381971	XP_013980795.1	LOC106561392	homeodomain-interacting protein kinase 2-like	protein_coding	ssa10	96068538	96203161	+	HIPK2
gene22268:106561361	-1.10591	1.4015	26.2049	9.62546e-07	1.50112e-05	XP_013980706.1	LOC106561361	nuclear ubiquitous casein and cyclin-dependent kinase substrate 1-like	protein_coding	ssa10	97956616	97961709	-
gene22311:106561572	1.00008	1.97594	9.82796	0.00208201	0.0093587	XP_013981150.1	LOC106561572	stonustoxin subunit beta-like	protein_coding	ssa10	99688624	99703907	+	TRIM52
gene22377:106561530	1.25592	2.11529	23.9933	2.55673e-06	3.44186e-05	XP_013981060.1	snx20	sorting nexin 20	protein_coding	ssa10	102505523	102532145	+	SNX20
gene22400:100136366	1.86624	5.00313	100.141	3.12173e-18	1.39455e-15	NP_001117006.1	LOC100136366	cystic fibrosis transmembrane conductance regulator II	protein_coding	ssa10	103145208	103219332	-	CFTR
gene22434:106561595	1.16686	2.91355	33.8948	3.61013e-08	9.22003e-07	XP_013981180.1	LOC106561595	kinesin-like protein KIF21A	protein_coding	ssa10	105027983	105099942	+	KIF21A
gene22445:106561635	-5.74211	1.33858	12.4762	0.000557104	0.00316503	XP_013981236.1	LOC106561635	ladderlectin-like	protein_coding	ssa10	105394685	105396302	-	REG1A
gene22446:106561636	-5.62764	-0.53289	11.1013	0.00110751	0.00559708					ssa10	105461326	105463607	-
gene2247:106563404	1.18716	3.22989	42.7161	1.01248e-09	4.27015e-08					ssa01	117121316	117126377	+
gene22534:106561692	1.44503	3.33847	10.2396	0.00169492	0.00793165	XP_013981373.1	LOC106561692	filamin-C-like	protein_coding	ssa10	108905664	108953120	+	FLNC
gene22549:106561697	1.51757	0.899705	17.4044	5.18816e-05	0.000435244	XP_013981380.1	LOC106561697	cGMP-inhibited 3'%2C5'-cyclic phosphodiesterase A-like	protein_coding	ssa10	109595034	109647468	-	PDE3A
gene2255:106563467	1.78719	3.06039	17.1354	5.92563e-05	0.000487948	XP_013984557.1	LOC106563467	heat shock protein beta-11-like	protein_coding	ssa01	117214526	117215499	-
gene22578:106561740	1.81021	0.233128	17.465	5.04271e-05	0.000425777	XP_013981442.1	LOC106561740	phosphatidylinositol 4-phosphate 3-kinase C2 domain-containing subunit gamma-like	protein_coding	ssa10	110929876	110938862	+
gene22579:106561742	1.82009	2.67241	16.7095	7.23379e-05	0.000577733	XP_013981445.1	LOC106561742	phosphatidylinositol 4-phosphate 3-kinase C2 domain-containing subunit gamma-like	protein_coding	ssa10	110950755	110973233	-	PIK3C2G
gene227:106612547	1.08754	4.3	51.9924	2.86461e-11	1.98888e-09	XP_014069297.1	LOC106612547	arf-GAP with SH3 domain%2C ANK repeat and PH domain-containing protein 3-like	protein_coding	ssa01	9644617	9701961	-	ASAP3
gene22701:106561865	-3.16936	0.150695	17.9624	4.00463e-05	0.000350868	XP_013981610.1	LOC106561865	calcium and integrin-binding family member 2-like	protein_coding	ssa10	115719116	115760950	-	CIB2
gene22767:100196456	1.35619	1.86927	9.78362	0.00213193	0.00953387	NP_001134957.1	csrp3	cysteine and glycine-rich protein 3 (cardiac LIM protein)	protein_coding	ssa11	8150651	8156401	+	CSRP3
gene22775:106561930	-1.18333	1.08377	11.2121	0.00103623	0.00529757					ssa11	8566726	8568993	+
gene22776:100136362	-1.87582	-0.849741	13.5794	0.00032254	0.00200553	XP_013981815.1	LOC100136362	gonadotropin subunit beta-1	protein_coding	ssa11	8571714	8577091	+
gene22859:106562013	-1.23642	2.22482	43.3521	7.88161e-10	3.45276e-08	XP_013982006.1	LOC106562013	uncharacterized protein F13E9.13%2C mitochondrial-like	protein_coding	ssa11	12753648	12757508	-
gene22860:106562012	-1.64004	2.60204	91.9285	3.71161e-17	1.38476e-14	XP_013982004.1	LOC106562012	G1/S-specific cyclin-E1-like	protein_coding	ssa11	12757746	12762505	+	CCNE1
gene22874:106562067	-1.05937	0.253757	10.9799	0.00116393	0.00582841	XP_013982092.1	LOC106562067	probable G-protein coupled receptor 97	protein_coding	ssa11	14178679	14182029	+
gene22911:106562160	1.66117	1.71843	30.1186	1.77247e-07	3.55868e-06	XP_013982317.1	LOC106562160	putative solute carrier family 22 member 31	protein_coding	ssa11	15447695	15459402	+	SLC22A31
gene22947:106562182	-2.14749	-0.108497	20.1976	1.42033e-05	0.000147242					ssa11	17092319	17097876	+
gene22948:106562181	-2.29293	0.145111	20.994	9.86988e-06	0.00010792					ssa11	17098492	17099127	+
gene22949:106562180	-1.40288	3.69786	34.7586	2.53078e-08	6.84097e-07	XP_013982351.1	LOC106562180	uncharacterized LOC106562180	protein_coding	ssa11	17162748	17166473	+
gene22951:106562131	-1.05626	1.39135	20.7842	1.08608e-05	0.00011691					ssa11	17194765	17197235	+
gene22961:100195460	1.06367	3.4531	41.4047	1.70195e-09	6.6801e-08	XP_013982099.1	kpyk	Pyruvate kinase muscle isozyme	protein_coding	ssa11	17427201	17449728	-	PKM
gene22974:106562111	2.12375	2.30079	41.1895	1.8607e-09	7.16243e-08	XP_013982184.1	LOC106562111	lymphatic vessel endothelial hyaluronic acid receptor 1-like	protein_coding	ssa11	18077457	18081197	-	LYVE1
gene22984:106562108	-1.45864	1.55897	29.2489	2.5715e-07	4.93528e-06	XP_013982178.1	LOC106562108	ras association domain-containing protein 10-like	protein_coding	ssa11	18478779	18480922	-	RASSF10
gene22999:106562092	1.19259	4.31843	15.3979	0.000134861	0.000971291	XP_013982135.1	LOC106562092	nuclear factor of activated T-cells 5-like	protein_coding	ssa11	18800301	18861703	+	NFAT5
gene23032:106562199	1.05034	5.35626	60.8927	1.10433e-12	1.14657e-10	XP_013982372.1	LOC106562199	myocardial zonula adherens protein-like	protein_coding	ssa11	20198764	20220622	-	GCOM1
gene2304:106563948	-1.04083	3.93463	48.8607	9.35037e-11	5.43586e-09	XP_013985395.1	LOC106563948	mothers against decapentaplegic homolog 4-like	protein_coding	ssa01	118695228	118711673	+
gene23046:106562219	-1.35184	0.488739	15.4808	0.000128976	0.000935654	XP_013982422.1	LOC106562219	pygopus homolog 1-like	protein_coding	ssa11	21019415	21025574	+	PYGO1
gene23047:106562220	-1.06329	0.976159	18.4457	3.18947e-05	0.000290312	XP_013982424.1	dyx1c1	dyslexia susceptibility 1 candidate 1	protein_coding	ssa11	21028256	21034544	+	DYX1C1
gene23050:106562255	-1.11989	0.453549	17.7997	4.31096e-05	0.000373562					ssa11	21052751	21055322	-
gene23086:106562250	-1.19175	7.40543	15.9851	0.000102097	0.000768239	XP_013982489.1	LOC106562250	ammonium transporter Rh type C-like	protein_coding	ssa11	21627278	21633421	+	RHCG
gene23113:106562278	-2.1794	-0.921876	15.1001	0.000154743	0.00108885	XP_013982524.1	LOC106562278	dysbindin domain-containing protein 1-like	protein_coding	ssa11	22116376	22156508	-	DBNDD1
gene23133:106562307	-2.21906	1.65058	49.9675	6.14118e-11	3.77716e-09	XP_013982575.1	LOC106562307	uncharacterized LOC106562307	protein_coding	ssa11	22846945	22848896	-
gene23177:106562332	1.32588	0.264943	13.2904	0.000371331	0.00226173	XP_013982611.1	LOC106562332	pleckstrin homology domain-containing family A member 7-like	protein_coding	ssa11	24926345	24949750	-	PLEKHA7
gene23183:106562338	2.00119	2.57114	55.7263	7.17447e-12	5.86941e-10	XP_013982631.1	LOC106562338	retinoblastoma-like protein 2	protein_coding	ssa11	25110537	25117640	-
gene23207:100136926	4.11699	6.79622	162.019	2.89235e-25	5.77636e-22	NP_001117166.1	cyp1a	cytochrome P450 1A	protein_coding	ssa11	26100579	26103710	+	CYP1A1
gene23215:106562345	-1.13401	0.234492	11.1016	0.00109512	0.00554846	XP_013982642.1	LOC106562345	leucine-rich repeat-containing protein 49-like	protein_coding	ssa11	26261030	26317671	+	LRRC49
gene23228:106562378	1.31233	4.00407	25.3265	1.42552e-06	2.08971e-05	XP_013982709.1	LOC106562378	Wilms tumor protein 1-interacting protein homolog	protein_coding	ssa11	26997595	27035279	-
gene23243:106562395	1.59933	3.45698	69.4281	5.57613e-14	8.19546e-12	XP_013982733.1	LOC106562395	retinoblastoma-like protein 2	protein_coding	ssa11	27770618	27773506	+
gene23266:106562415	1.17975	3.08963	10.6219	0.00139597	0.00676391	XP_013982762.1	LOC106562415	epithelial splicing regulatory protein 2-like	protein_coding	ssa11	29792068	29813867	-
gene23277:100196041	1.7862	2.13029	17.5451	4.87226e-05	0.000413856	NP_001134542.1	tecta	Alpha-tectorin	protein_coding	ssa11	30227967	30235478	-
gene23290:106562437	1.12764	1.49554	17.0059	6.25724e-05	0.000510427	XP_013982800.1	LOC106562437	iroquois-class homeodomain protein irx-3-like	protein_coding	ssa11	30605316	30608751	+	IRX3
gene23301:106562446	2.23112	-0.558579	21.9816	6.30482e-06	7.38121e-05	XP_013982812.1	LOC106562446	nuclear factor of activated T-cells%2C cytoplasmic 3-like	protein_coding	ssa11	31500513	31533132	+
gene23337:106562488	1.15136	2.78743	14.9414	0.0001671	0.00116302	XP_013982869.1	LOC106562488	protein FAM214A-like	protein_coding	ssa11	32431337	32439968	+	FAM214A
gene23340:106562490	1.54836	0.109477	12.2368	0.000622888	0.00347481	XP_013982871.1	LOC106562490	putative protein TPRXL	protein_coding	ssa11	32536676	32544153	-
gene23349:106562498	1.89197	-0.691073	11.5071	0.000894408	0.00469118	XP_013982891.1	LOC106562498	fibroblast growth factor 7-like	protein_coding	ssa11	32821564	32824291	+	FGF7
gene23352:106562499	-1.08065	1.4524	12.9369	0.000441412	0.00261041	XP_013982892.1	LOC106562499	spermatogenesis-associated protein 5-like protein 1	protein_coding	ssa11	32910896	32922550	+	SPATA5L1
gene23361:106562509	1.9693	1.40537	24.3969	2.13676e-06	2.93586e-05	XP_013982900.1	LOC106562509	protein FAM214A-like	protein_coding	ssa11	33151939	33176670	-	FAM214A
gene23370:106562514	-1.41858	0.44366	21.5069	7.81704e-06	8.85245e-05	XP_013982909.1	LOC106562514	gastrula zinc finger protein XlCGF7.1-like	protein_coding	ssa11	33371703	33381871	-
gene23374:106562520	1.28151	0.70408	9.74023	0.00217708	0.00969489					ssa11	33443689	33446011	+
gene23399:106562537	-1.55718	0.829447	20.2513	1.38579e-05	0.000144101					ssa11	34744940	34747225	-
gene2341:106564343	1.37304	5.16384	37.0601	9.93707e-09	3.09233e-07	XP_013985876.1	LOC106564343	protein phosphatase Slingshot homolog 1-like	protein_coding	ssa01	120451805	120476222	+	SSH1
gene23413:106562558	1.83731	0.252215	18.4457	3.18949e-05	0.000290312	XP_013982972.1	LOC106562558	GTPase-activating Rap/Ran-GAP domain-like protein 3	protein_coding	ssa11	35042570	35063427	+	GARNL3
gene23429:106562573	1.25411	1.59235	14.2715	0.000230578	0.00151683					ssa11	35705076	35708869	-
gene23465:106562609	1.02671	5.17305	15.4263	0.000133026	0.000959706	XP_013983036.1	LOC106562609	ceramide synthase 2-like	protein_coding	ssa11	36906959	36917739	-
gene23487:106562630	-1.06589	1.60187	22.8721	4.22105e-06	5.25326e-05	XP_013983066.1	LOC106562630	uncharacterized LOC106562630	protein_coding	ssa11	37540418	37551824	+
gene23526:100196041	1.64082	2.38049	24.7978	1.79139e-06	2.5352e-05	NP_001134542.1	tecta	Alpha-tectorin	protein_coding	ssa11	38862002	38865144	-
gene23546:106562696	-1.00193	1.66127	14.6679	0.000190454	0.00129799	XP_013983154.1	LOC106562696	cyclin-dependent kinase inhibitor 1B-like	protein_coding	ssa11	39810836	39812305	-	CDKN1C
gene23610:106562764	1.64963	0.37681	14.6518	0.000191937	0.00130695					ssa11	42009571	42037876	+
gene2362:100380443	1.54266	1.73692	21.5285	7.7408e-06	8.77782e-05	NP_001167198.1	ggt5	gamma-glutamyltransferase 5	protein_coding	ssa01	120897334	120907756	-	GGT5
gene23627:106562780	-1.24768	0.748742	18.512	3.09267e-05	0.000282865					ssa11	42913920	42935245	+
gene23665:106562822	1.3531	2.37326	18.5588	3.02741e-05	0.000277644	XP_013983316.1	LOC106562822	liprin-alpha-1-like	protein_coding	ssa11	44208978	44232022	-	PPFIA1
gene23675:106562829	1.55492	-0.486606	12.1621	0.000646281	0.00358645	XP_013983326.1	LOC106562829	ral guanine nucleotide dissociation stimulator-like	protein_coding	ssa11	44785475	44910558	+	RALGDS
gene23749:106563000	1.64881	3.63771	41.221	1.84638e-09	7.11538e-08					ssa11	49675428	49727740	-
gene2377:106564765	2.7002	1.73108	28.7099	3.26852e-07	6.02441e-06	XP_013986586.1	LOC106564765	calsenilin-like	protein_coding	ssa01	121235088	121252179	+	KCNIP3
gene23810:106562958	-1.15692	2.49735	48.7498	9.75397e-11	5.57503e-09					ssa11	51965553	51973368	-
gene23817:106562964	-1.28298	-0.112374	11.4684	0.000911816	0.00476483					ssa11	52822086	52824676	+
gene23837:106562982	-1.83722	1.22916	12.6146	0.000517843	0.00297988	XP_013983625.1	LOC106562982	NK1 transcription factor-related protein 2-like	protein_coding	ssa11	54975003	54976660	+
gene23866:106563080	-1.87334	4.43615	330.363	3.57644e-39	1.21424e-34	XP_013983781.1	LOC106563080	arrestin domain-containing protein 3-like	protein_coding	ssa11	55704742	55712396	+	ARRDC3
gene239:106562016	1.15752	1.18627	18.7944	2.71257e-05	0.000253146	XP_013982036.1	LOC106562016	platelet-activating factor receptor-like	protein_coding	ssa01	10849528	10852169	-	PTAFR
gene23906:106563047	1.08642	2.03907	9.68555	0.00223904	0.00990847	XP_013983739.1	LOC106563047	homer protein homolog 1-like	protein_coding	ssa11	57236440	57320764	+	HOMER1
gene23944:106563020	1.17659	2.23333	13.5886	0.0003212	0.00199983	XP_013983689.1	LOC106563020	TNF receptor-associated factor 2-like	protein_coding	ssa11	58411068	58430374	+
gene24106:106563253	-1.82724	-0.477522	16.984	6.32215e-05	0.000515103					ssa11	68671878	68685191	-
gene24131:106563235	-1.03327	1.68521	19.013	2.45127e-05	0.000232857	XP_013984103.1	LOC106563235	zinc finger protein Gfi-1b-like	protein_coding	ssa11	69400950	69407523	-	GFI1B
gene24184:106563196	-1.02333	2.2689	29.4508	2.35819e-07	4.57503e-06	XP_013984002.1	LOC106563196	extensin-like	protein_coding	ssa11	72319966	72325010	-
gene24195:106563187	1.75759	4.08696	117.122	2.29946e-20	1.62644e-17	XP_013983980.1	LOC106563187	solute carrier family 35 member E4-like	protein_coding	ssa11	72480774	72490676	-	SLC35E4
gene24198:106563184	1.71534	3.13867	97.7415	6.30036e-18	2.6738e-15	XP_013983971.1	LOC106563184	V-type proton ATPase 116 kDa subunit a isoform 2-like	protein_coding	ssa11	72561047	72574129	-	ATP6V0A2
gene24209:106563331	1.09126	4.04316	10.1915	0.00173603	0.00808617	XP_013984325.1	LOC106563331	poly [ADP-ribose] polymerase 14-like	protein_coding	ssa11	72828122	72852114	+
gene24224:106563379	-4.73058	-0.931014	11.7049	0.000812148	0.00433266	XP_013984358.1	LOC106563379	endonuclease domain-containing 1 protein-like	protein_coding	ssa11	73392578	73417605	-	ENDOD1
gene2424:106565855	-1.52976	6.46072	26.9337	7.11961e-07	1.16322e-05	XP_013988932.1	LOC106565855	C-C motif chemokine 19-like	protein_coding	ssa01	122209795	122211056	+	CCL19
gene24245:106563397	2.01089	-0.268781	16.3141	8.67619e-05	0.000670622	XP_013984388.1	LOC106563397	gamma-aminobutyric acid receptor subunit beta-4-like	protein_coding	ssa11	73870569	73913048	-	GABRB3
gene24289:106563501	-1.18759	4.44908	105.761	5.85282e-19	3.05706e-16	XP_013984627.1	slc3a2	solute carrier family 3 (amino acid transporter heavy chain)%2C member 2	protein_coding	ssa11	75283611	75289187	+	SLC3A2
gene24359:106563433	-1.20767	0.470889	11.1732	0.00105658	0.00538454	XP_013984477.1	LOC106563433	extensin-1-like	protein_coding	ssa11	76725038	76726774	+
gene24384:106563418	-1.64612	2.38644	65.3483	2.28712e-13	2.88822e-11	XP_013984447.1	neu3	sialidase 3 (membrane sialidase)	protein_coding	ssa11	77406338	77409036	+
gene2441:106565324	1.15362	4.18745	48.7535	9.74027e-11	5.57503e-09	XP_013987754.1	LOC106565324	guanine nucleotide exchange factor VAV2-like	protein_coding	ssa01	123715193	123930279	-	VAV2
gene24472:106563619	-1.71154	0.587732	26.3449	9.0529e-07	1.42581e-05	XP_013984832.1	LOC106563619	uncharacterized LOC106563619	protein_coding	ssa11	78875296	78877680	-
gene24493:106563652	-1.01644	2.4201	18.9852	2.48307e-05	0.000234892	XP_013984893.1	LOC106563652	NEDD4-binding protein 2-like 1	protein_coding	ssa11	79565868	79569834	-
gene24494:106563651	-1.21324	0.149794	12.9316	0.000442565	0.00261539	XP_013984892.1	zar1l	zygote arrest 1-like	protein_coding	ssa11	79569873	79572215	+	ZAR1L
gene24514:106563702	1.11381	2.27512	18.0171	3.89462e-05	0.000343177	XP_013984991.1	LOC106563702	RNA-binding protein 4-like	protein_coding	ssa11	80881465	80885064	+
gene24598:106563725	-1.80532	-0.0356933	19.4567	1.99682e-05	0.000196236					ssa11	83239491	83249905	+
gene24611:106563764	-1.06766	0.61859	13.677	0.000307583	0.0019342					ssa11	83880193	83885440	-
gene24630:106563781	1.1746	3.50032	10.8271	0.00125986	0.00621798	XP_013985107.1	LOC106563781	protein furry homolog	protein_coding	ssa11	84568824	84623353	+	FRY
gene24744:106563886	1.75861	1.10511	13.1259	0.000402642	0.00241992	XP_013985291.1	synj1	synaptojanin 1	protein_coding	ssa11	89340463	89376663	-	SYNJ1
gene24745:106563888	-1.12163	0.509835	13.6752	0.000307851	0.00193481	XP_013985301.1	LOC106563888	UPF0769 protein C21orf59 homolog	protein_coding	ssa11	89382146	89384754	+	C21orf59
gene24748:106563893	1.30219	1.75086	12.5235	0.000540944	0.00309759	XP_013985305.1	LOC106563893	splicing factor%2C arginine/serine-rich 15-like	protein_coding	ssa11	89431034	89461854	+	SCAF4
gene24753:106563895	1.19489	1.83238	12.7394	0.000486327	0.00282582	XP_013985316.1	LOC106563895	T-lymphoma invasion and metastasis-inducing protein 1-like	protein_coding	ssa11	89764154	89821916	+	TIAM1
gene24786:106563929	1.48239	0.636786	11.4767	0.000908061	0.00474886	XP_013985350.1	proser1	proline and serine rich 1	protein_coding	ssa11	91954576	91983329	+	PROSER1
gene24824:106563956	1.84204	4.34739	120.521	8.97543e-21	6.63743e-18	XP_013985385.1	LOC106563956	tripartite motif-containing protein 35-like	protein_coding	ssa11	93294519	93307015	-	TRIM35
gene24842:106563976	-1.63872	-0.344586	16.6341	7.4568e-05	0.000592201					ssa12	136658	142754	+
gene24845:106563978	1.45865	0.177675	10.2768	0.00165819	0.00779093	XP_013985408.1	LOC106563978	forkhead box protein K1-like	protein_coding	ssa12	218615	222109	+
gene24874:106564010	-1.37649	0.852277	22.2617	5.55564e-06	6.62753e-05	XP_013985449.1	LOC106564010	gastrula zinc finger protein XlCGF17.1-like	protein_coding	ssa12	964699	969414	+
gene24875:106564011	-1.02487	0.971333	14.528	0.000203726	0.00137591	XP_013985450.1	LOC106564011	gastrula zinc finger protein XlCGF17.1-like	protein_coding	ssa12	987294	993039	+	ZNF544
gene24878:106564008	-1.41759	0.754081	24.5688	1.97985e-06	2.76049e-05	XP_013985447.1	LOC106564008	zinc finger protein 431-like	protein_coding	ssa12	1033024	1035722	+	ZNF544
gene24888:106564025	-1.27897	0.0734433	12.2371	0.00062279	0.00347481					ssa12	1422351	1426698	+
gene24889:106564028	-1.58265	-0.109614	15.0667	0.000157245	0.00110371	XP_013985474.1	LOC106564028	cell wall protein DAN4-like	protein_coding	ssa12	1435368	1451660	+
gene24890:106564020	-2.80198	0.122339	52.9693	1.98878e-11	1.44585e-09	XP_013985463.1	LOC106564020	zinc finger protein 883-like	protein_coding	ssa12	1459711	1469697	+	ZNF544
gene24895:106564029	-2.52757	-0.381886	30.021	1.84785e-07	3.68604e-06					ssa12	1563795	1566495	+
gene24904:106564037	-2.06196	-0.0404764	34.7814	2.49859e-08	6.76473e-07	XP_013985487.1	LOC106564037	zinc finger protein 431-like	protein_coding	ssa12	1725376	1733211	-
gene24907:106564045	-1.59738	0.210609	25.2368	1.47338e-06	2.14597e-05	XP_013985499.1	LOC106564045	zinc finger protein 239-like	protein_coding	ssa12	1773665	1783805	-
gene24908:106564038	-1.19386	0.0900901	11.3852	0.000950457	0.00492957	XP_013985488.1	LOC106564038	zinc finger protein 883-like	protein_coding	ssa12	1787874	1795025	-
gene24909:106564040	-1.97377	-0.104215	22.8673	4.23015e-06	5.26266e-05	XP_013985491.1	LOC106564040	zinc finger protein 558-like	protein_coding	ssa12	1802306	1822140	-
gene24913:106564049	-1.12667	1.27595	27.5088	5.45004e-07	9.25172e-06	XP_013985503.1	LOC106564049	zinc finger protein 501-like	protein_coding	ssa12	1866916	1880993	-	ZNF544
gene24918:106564059	-1.51245	-0.575369	9.89505	0.00201218	0.0091039	XP_013985512.1	LOC106564059	zinc finger protein 239-like	protein_coding	ssa12	1940569	1954857	-
gene24920:106564043	-1.26948	0.580014	12.6575	0.000506296	0.00292434					ssa12	1982695	2058220	+
gene24921:106564056	-1.31207	1.50815	31.7553	8.85041e-08	1.9588e-06	XP_013985509.1	LOC106564056	zinc finger protein 345-like	protein_coding	ssa12	1994163	2010186	+
gene24923:106564050	-1.12906	0.178061	10.9567	0.00117753	0.00588607	XP_013985504.1	LOC106564050	zinc finger protein 79-like	protein_coding	ssa12	2026916	2028926	+	ZNF544
gene2494:106565903	1.14433	3.1052	24.7124	1.8578e-06	2.60874e-05	XP_013989055.1	LOC106565903	pappalysin-1-like	protein_coding	ssa01	127137104	127258257	-	PAPPA
gene24946:106564083	1.36322	0.0857261	10.3987	0.00155912	0.00739506					ssa12	2686108	2708206	+
gene24948:106564079	-1.40844	0.367543	19.4833	1.97252e-05	0.000194282	XP_013985543.1	LOC106564079	zinc finger protein 501-like	protein_coding	ssa12	2717131	2722153	-
gene24966:106564110	1.39908	4.31333	13.2339	0.000383717	0.00232262	XP_013985579.1	LOC106564110	uncharacterized LOC106564110	protein_coding	ssa12	3103259	3176149	-	MSLNL
gene24974:106564112	-1.14672	1.72063	25.6672	1.21884e-06	1.83752e-05	XP_013985581.1	LOC106564112	zinc finger protein OZF-like	protein_coding	ssa12	3283646	3287603	-
gene25001:106564139	1.02896	3.24316	9.77442	0.00214258	0.00957266	XP_013985630.1	LOC106564139	cdc42-interacting protein 4 homolog	protein_coding	ssa12	4085037	4096722	+	TRIP10
gene25066:106564203	-1.86246	-0.370444	20.5906	1.18645e-05	0.000125957	XP_013985721.1	LOC106564203	zinc finger protein 239-like	protein_coding	ssa12	6255183	6270344	+
gene25112:106564255	1.10432	0.720912	10.0124	0.00189577	0.00868912	XP_013985775.1	LOC106564255	far upstream element-binding protein 3-like	protein_coding	ssa12	7415169	7418507	-
gene25124:106564265	1.41969	3.99498	124.268	3.22782e-21	2.73969e-18	XP_013985783.1	LOC106564265	dnaJ homolog subfamily B member 1-like	protein_coding	ssa12	7646534	7652047	+	DNAJB1
gene25194:106564341	-1.02592	1.36991	10.5698	0.00143024	0.00689743					ssa12	8920359	8922646	+
gene25231:106564380	2.18086	1.41052	18.6654	2.891e-05	0.000266936	XP_013985928.1	LOC106564380	uncharacterized LOC106564380	protein_coding	ssa12	9790413	9796867	-
gene25248:106564415	-1.11572	1.2856	16.9804	6.33295e-05	0.000515859	XP_013985980.1	LOC106564415	zinc finger protein 271-like	protein_coding	ssa12	10116746	10154224	+
gene25254:106564402	-1.78161	0.24525	21.1011	9.39992e-06	0.000103683	XP_013985965.1	LOC106564402	zinc finger protein 664-like	protein_coding	ssa12	10425166	10458040	+	ZNF180
gene25257:106564400	-1.90198	0.476153	28.9743	2.89338e-07	5.43025e-06	XP_013985959.1	LOC106564400	zinc finger protein 271-like	protein_coding	ssa12	10510503	10534064	-
gene25284:106564432	-1.34853	1.10728	26.8069	7.39755e-07	1.20046e-05	XP_013986002.1	LOC106564432	intraflagellar transport protein 27 homolog	protein_coding	ssa12	11627845	11633121	-	IFT27
gene2532:106566778	-1.19544	3.08184	60.8728	1.11223e-12	1.15126e-10	XP_013990644.1	tmem141	transmembrane protein 141	protein_coding	ssa01	129047526	129049131	-	TMEM141
gene25326:106564473	1.32154	0.63788	12.1358	0.000654742	0.00362038	XP_013986058.1	LOC106564473	max-interacting protein 1-like	protein_coding	ssa12	13343222	13370202	+	MXI1
gene25337:106564484	-1.2792	0.539197	15.8814	0.000106552	0.000796119	XP_013986074.1	LOC106564484	zinc finger protein 260-like	protein_coding	ssa12	13680044	13688793	-
gene25338:106564487	-1.75837	-0.471755	12.7626	0.000480817	0.002801	XP_013986079.1	LOC106564487	zinc finger protein 625-like	protein_coding	ssa12	13690407	13694919	-
gene25339:106564488	-1.5428	-0.323474	13.1375	0.000400136	0.00240656	XP_013986081.1	LOC106564488	gastrula zinc finger protein XlCGF17.1-like	protein_coding	ssa12	13697189	13702271	-
gene25340:106564486	-1.46879	2.23705	52.181	2.66934e-11	1.87633e-09	XP_013986076.1	LOC106564486	zinc finger protein 664-like	protein_coding	ssa12	13711142	13724119	-
gene25342:100286708	-1.45274	1.72697	46.728	2.1176e-10	1.09262e-08	NP_001140120.1	zn391	Zinc finger protein 391	protein_coding	ssa12	13739884	13752032	-
gene25349:106564490	-1.52825	2.15846	70.8768	3.40087e-14	5.57792e-12	XP_013986083.1	LOC106564490	gastrula zinc finger protein XlCGF57.1-like	protein_coding	ssa12	13879325	13892129	-	ZNF180
gene2536:106566762	1.11287	4.26419	10.5232	0.00146866	0.00704473	XP_013990611.1	traf2	TNF receptor-associated factor 2	protein_coding	ssa01	129093176	129115873	+	TRAF2
gene25364:106564514	1.92633	-0.447142	10.1315	0.00178468	0.00826487	XP_013986113.1	LOC106564514	nuclear factor 1 X-type-like	protein_coding	ssa12	14333368	14335655	+	NFIX
gene25380:106564531	1.07534	4.7615	50.7269	4.60909e-11	2.98632e-09	XP_013986134.1	LOC106564531	GATA zinc finger domain-containing protein 10-like	protein_coding	ssa12	14618172	14621834	-
gene25395:106564542	1.00763	3.73099	23.0796	3.84773e-06	4.85991e-05	XP_013986147.1	LOC106564542	activating transcription factor 7-interacting protein 1-like	protein_coding	ssa12	14961299	14983128	+	ATF7IP
gene25405:106564551	1.21023	2.70722	13.2962	0.000370766	0.00225913	XP_013986158.1	micall1	MICAL-like 1	protein_coding	ssa12	15197260	15215935	-	MICALL1
gene25407:106564555	-1.07241	1.8296	29.007	2.85299e-07	5.36631e-06	XP_013986164.1	LOC106564555	zinc finger protein 883-like	protein_coding	ssa12	15228236	15247300	-	ZNF180
gene25408:106564556	1.40356	1.90899	23.7945	2.79357e-06	3.71357e-05	XP_013986165.1	LOC106564556	activating transcription factor 7-interacting protein 1-like	protein_coding	ssa12	15362933	15397941	+	ATF7IP
gene25422:106564574	1.63579	2.62791	22.3181	5.4365e-06	6.5014e-05					ssa12	15628486	15644870	+
gene25462:106564614	-1.28062	2.17717	43.0611	8.83745e-10	3.76935e-08	XP_013986254.1	LOC106564614	lisH domain-containing protein FOPNL-like	protein_coding	ssa12	16987184	16988579	+	FOPNL
gene25464:106564621	-1.12792	0.891687	23.0377	3.91871e-06	4.92939e-05					ssa12	17152928	17155833	+
gene25487:106564704	-1.5197	-0.541652	10.6676	0.00136154	0.00663304					ssa12	17540170	17541521	-
gene25498:106564692	1.53893	2.92133	25.374	1.39166e-06	2.05071e-05	XP_013986420.1	LOC106564692	E3 ubiquitin-protein ligase NEURL1-like	protein_coding	ssa12	17893072	17952655	-	NEURL1
gene25500:106564713	1.08758	0.919039	13.9774	0.000265854	0.00171793	XP_013986476.1	LOC106564713	alpha-1%2C3-mannosyl-glycoprotein 4-beta-N-acetylglucosaminyltransferase B-like	protein_coding	ssa12	18432419	18569658	+	MGAT4B
gene25505:106564720	-1.5226	3.41395	45.6426	3.22301e-10	1.55875e-08	XP_013986481.1	LOC106564720	C-X-C motif chemokine 11-like	protein_coding	ssa12	19630841	19632724	-
gene25538:106564658	3.96418	0.675852	65.9803	1.83457e-13	2.39559e-11	XP_013986321.1	LOC106564658	rhomboid-related protein 3-like	protein_coding	ssa12	20878203	20940381	-
gene25567:106564722	-3.18975	6.75371	18.5073	3.15763e-05	0.000288107	XP_013986483.1	LOC106564722	uncharacterized LOC106564722	protein_coding	ssa12	21937901	21943131	+
gene25589:106564738	-1.15954	2.32883	50.617	4.80418e-11	3.095e-09	XP_013986523.1	LOC106564738	hydrolethalus syndrome protein 1 homolog	protein_coding	ssa12	22339075	22350418	+	HYLS1
gene25591:106564761	1.86428	1.23083	13.0521	0.000418012	0.00249419	XP_013986579.1	LOC106564761	neuroblast differentiation-associated protein AHNAK-like	protein_coding	ssa12	22357214	22368196	-
gene25592:106564740	1.61633	4.23513	18.6835	2.88179e-05	0.000266211	XP_013986524.1	LOC106564740	neuroblast differentiation-associated protein AHNAK-like	protein_coding	ssa12	22380415	22393741	-
gene25601:106564750	-1.20446	0.495538	19.5797	1.88682e-05	0.000187199	XP_013986547.1	LOC106564750	cell division control protein 6 homolog	protein_coding	ssa12	22530915	22536262	+	CDC6
gene25631:106564949	-1.10363	2.55546	36.1745	1.40715e-08	4.13987e-07	XP_013986972.1	LOC106564949	polycomb complex protein BMI-1-like	protein_coding	ssa12	23068689	23078586	-
gene25646:106564936	1.19253	3.28643	22.6998	4.56708e-06	5.60987e-05	XP_013986946.1	LOC106564936	integrin alpha-L-like	protein_coding	ssa12	23260251	23282831	-	ITGAL
gene25663:106564916	-1.21875	0.854622	20.3853	1.30326e-05	0.000136522					ssa12	24069994	24077621	+
gene25675:106564909	-1.39298	-0.362799	11.5386	0.000880494	0.00462894					ssa12	24413816	24415216	+
gene25678:106564905	-1.03755	1.72412	34.6227	2.66835e-08	7.16151e-07	XP_013986880.1	LOC106564905	DNA polymerase subunit gamma-2%2C mitochondrial-like	protein_coding	ssa12	24461992	24467053	-	POLG2
gene25683:106564901	-1.17436	1.30042	28.3932	3.71638e-07	6.69718e-06	XP_013986871.1	LOC106564901	zinc finger protein 787-like	protein_coding	ssa12	24630242	24634883	+
gene2571:106567203	-1.65812	0.391374	13.3265	0.000364853	0.0022271					ssa01	129973899	129974718	-
gene25716:106564870	1.43836	2.36257	23.8475	2.72844e-06	3.64124e-05	XP_013986823.1	LOC106564870	uncharacterized LOC106564870	protein_coding	ssa12	25988097	25996354	-	C17orf58
gene25731:106564859	1.51133	3.34629	116.985	2.38876e-20	1.65512e-17	XP_013986803.1	LOC106564859	N-acetyllactosaminide beta-1%2C3-N-acetylglucosaminyltransferase 2-like	protein_coding	ssa12	26264273	26280284	+
gene25779:106564820	-1.02226	3.08637	42.0361	1.32476e-09	5.36719e-08					ssa12	27689741	27691260	-
gene2578:106566501	-1.6109	0.831717	20.9975	9.8544e-06	0.000107786					ssa01	130067632	130070214	-
gene25786:106564813	1.16803	0.798385	13.6764	0.000307682	0.00193446	XP_013986713.1	LOC106564813	uncharacterized LOC106564813	protein_coding	ssa12	28100654	28138112	-
gene25787:106564985	-5.71192	0.711999	10.1531	0.00177191	0.00821712					ssa12	28183261	28184815	+
gene25803:106564804	-1.03748	2.03751	20.8375	1.05999e-05	0.0001144	XP_013986690.1	LOC106564804	TNF receptor-associated factor 5-like	protein_coding	ssa12	28823938	28836326	-
gene2581:106567175	-1.3983	2.98776	26.6607	7.89358e-07	1.26652e-05					ssa01	130088959	130091414	-
gene25896:106565045	-1.48871	0.0810417	18.0773	3.78666e-05	0.000335406					ssa12	33241465	33247235	-
gene25948:106565282	1.50888	1.79828	19.3134	2.1334e-05	0.000207123	XP_013987696.1	LOC106565282	eyes absent homolog 2-like	protein_coding	ssa12	38059980	38131628	+	EYA2
gene26025:106565210	-1.53119	0.0742388	16.5894	7.61618e-05	0.000602884					ssa12	42785978	42787771	+
gene26045:106565194	2.80464	-0.423794	9.99497	0.0019145	0.0087548	XP_013987523.1	LOC106565194	neuroendocrine convertase 1-like	protein_coding	ssa12	43719726	43754139	+	PCSK1
gene26060:100286598	-1.21629	1.98443	43.6564	6.99377e-10	3.08772e-08	XP_013987213.1	tpgs2	tubulin polyglutamylase complex subunit 2	protein_coding	ssa12	44135670	44141487	+	TPGS2
gene26086:106565156	-1.06834	3.15704	36.7218	1.12455e-08	3.44893e-07	XP_013987435.1	LOC106565156	uncharacterized LOC106565156	protein_coding	ssa12	44963569	45000322	+
gene2609:106566303	1.03132	4.90173	33.8678	3.65817e-08	9.31723e-07	XP_013989686.1	LOC106566303	sarcoplasmic/endoplasmic reticulum calcium ATPase 2-like	protein_coding	ssa01	131577097	131642577	+	ATP2A2
gene26117:106565132	2.28808	1.06357	35.8876	1.58313e-08	4.56273e-07	XP_013987376.1	LOC106565132	solute carrier family 25 member 34-like	protein_coding	ssa12	45722406	45739005	-
gene26145:106565112	2.55613	6.03633	145.074	1.56944e-23	2.3167e-20	XP_013987325.1	LOC106565112	cryptochrome-1-like	protein_coding	ssa12	46213291	46223102	-	CRY1
gene26170:106565089	-1.33268	0.21936	19.0288	2.4334e-05	0.00023158	XP_013987247.1	LOC106565089	zinc finger and SCAN domain-containing protein 2-like	protein_coding	ssa12	47765171	47768041	-
gene26176:106565323	-1.00501	0.266305	11.2423	0.00102072	0.00523164	XP_013987747.1	LOC106565323	voltage-dependent calcium channel subunit alpha-2/delta-3-like	protein_coding	ssa12	47932845	47946980	-	CACNA2D3
gene26209:106565346	3.88396	7.37288	141.088	4.75482e-23	5.97892e-20	XP_013987820.1	LOC106565346	peptidyl-prolyl cis-trans isomerase FKBP5-like	protein_coding	ssa12	49824186	49850676	-	FKBP5
gene26211:100196383	1.24348	5.6554	18.1833	3.63426e-05	0.000324446	XP_013987757.1	rab37	Ras-related protein Rab-37	protein_coding	ssa12	49880089	49890072	+
gene26258:106565379	1.50456	4.14039	46.4321	2.39243e-10	1.21413e-08	XP_013987900.1	LOC106565379	lysyl oxidase homolog 2A-like	protein_coding	ssa12	51556772	51601581	-	LOXL2
gene26264:106565490	-1.37179	0.0176715	15.4683	0.000129748	0.000940248	XP_013988185.1	LOC106565490	beta-crystallin B3-like	protein_coding	ssa12	51704163	51709065	-	CRYBB3
gene26276:106565395	1.33132	3.29353	30.523	1.49395e-07	3.08636e-06	XP_013987934.1	LOC106565395	transcription factor SOX-4-like	protein_coding	ssa12	52077963	52084651	+	SOX12
gene26294:106565406	1.48713	3.90826	12.2813	0.000612151	0.00342584	XP_013987978.1	LOC106565406	nuclear receptor subfamily 4 group A member 1-like	protein_coding	ssa12	52412072	52437985	-
gene26298:106565408	1.05834	3.83822	9.86016	0.00205301	0.00925406	XP_013987981.1	LOC106565408	serine/threonine-protein phosphatase 6 regulatory ankyrin repeat subunit C-like	protein_coding	ssa12	52525103	52563425	-	ANKRD52
gene26325:106565435	1.00555	1.73267	16.5959	7.59262e-05	0.000601318	XP_013988046.1	LOC106565435	growth/differentiation factor 11-like	protein_coding	ssa12	53223044	53276090	+	GDF11
gene26341:106565450	-1.58861	-0.211108	15.4794	0.000129064	0.000935693	XP_013988076.1	LOC106565450	G-protein coupled receptor 182-like	protein_coding	ssa12	53781673	53785158	-	GPR182
gene26430:106565554	-2.5378	6.72536	297.904	6.0718e-37	5.15359e-33	XP_013988287.1	LOC106565554	histone H1x	protein_coding	ssa12	57757626	57758799	-	H1FX
gene26452:106565534	-1.55765	-0.385901	12.6702	0.000503128	0.00290802					ssa12	58321863	58327698	+
gene26483:100196436	-1.22168	1.10323	27.2695	6.04743e-07	1.01091e-05	NP_001134937.1	fa86a	FAM86A	protein_coding	ssa12	59114923	59131081	-	EEF2KMT
gene26498:106565668	1.61161	5.73469	143.769	1.96839e-23	2.67315e-20	XP_013988493.1	LOC106565668	probable G-protein coupled receptor 61	protein_coding	ssa12	59405869	59412339	-	GPR61
gene2650:106567650	-1.12132	1.52235	11.2765	0.00100344	0.0051563	XP_013992667.1	LOC106567650	interleukin-31 receptor subunit alpha-like	protein_coding	ssa01	134308578	134328729	-
gene26509:106565658	-1.22921	6.10538	191.757	2.70302e-28	1.01967e-24	XP_013988474.1	LOC106565658	serine/arginine-rich splicing factor 3	protein_coding	ssa12	59718984	59723850	+	SRSF3
gene26520:106565648	-2.43405	-0.299058	22.5567	4.86403e-06	5.92532e-05	XP_013988454.1	LOC106565648	transmembrane protein 88B-like	protein_coding	ssa12	60001340	60010486	+
gene26555:106565617	1.5607	0.752951	14.1174	0.000248421	0.00161915	XP_013988397.1	LOC106565617	uncharacterized LOC106565617	protein_coding	ssa12	61109634	61112578	+
gene26566:106565694	1.00601	2.62216	13.3638	0.000358269	0.00219243	XP_013988539.1	LOC106565694	transcription factor EB-like	protein_coding	ssa12	61588376	61651838	+	TFEB
gene26646:106565853	-1.06553	1.41931	27.2969	5.97578e-07	1.00091e-05	XP_013988922.1	cssa12h3orf14	chromosome ssa12 open reading frame%2C human C3orf14	protein_coding	ssa12	66472937	66480362	+	C3orf14
gene26659:106565842	1.16785	2.00432	10.5668	0.00143274	0.00690656	XP_013988900.1	LOC106565842	A disintegrin and metalloproteinase with thrombospondin motifs 9-like	protein_coding	ssa12	67125923	67164928	-	ADAMTS9
gene267:100380710	-1.13346	3.95288	83.405	5.42932e-16	1.549e-13	XP_013986718.1	orc3	origin recognition complex%2C subunit 3	protein_coding	ssa01	12083252	12092372	-	ORC3
gene26733:106565943	-1.25148	-0.292976	10.4678	0.00150569	0.00718781					ssa12	70837516	70839094	-
gene26748:106565925	-1.45072	-0.420216	13.0811	0.000411331	0.00246341	XP_013989096.1	LOC106565925	E3 ubiquitin-protein ligase TRAIP-like	protein_coding	ssa12	71163809	71167561	-
gene26770:106565734	-1.67973	0.210544	21.9656	6.35046e-06	7.42696e-05	XP_013988649.1	LOC106565734	probable G-protein coupled receptor 173	protein_coding	ssa12	72596121	72600701	+	GPR173
gene26808:106565704	-1.06886	1.30333	19.3294	2.11764e-05	0.000206005	XP_013988572.1	LOC106565704	epithelial membrane protein 3-like	protein_coding	ssa12	74977753	74982247	+	EMP3
gene26810:106565962	1.82714	0.672742	13.8782	0.000278983	0.00178679	XP_013989132.1	LOC106565962	forkhead box protein J3-like	protein_coding	ssa12	75051621	75144814	+
gene26813:106565964	1.2374	3.36592	41.1712	1.86765e-09	7.18104e-08	XP_013989141.1	LOC106565964	kazrin-like	protein_coding	ssa12	75291855	75475861	+	KAZN
gene26826:106565979	-1.5906	2.74059	43.0971	8.71323e-10	3.72104e-08	XP_013989180.1	LOC106565979	cytokine-inducible SH2-containing protein-like	protein_coding	ssa12	75673119	75680513	+	CISH
gene26949:106566040	1.20984	7.97065	120.514	8.99301e-21	6.63743e-18	XP_013989323.1	LOC106566040	mitochondrial glutamate carrier 1-like	protein_coding	ssa12	78700651	78707563	+	SLC25A22
gene26964:106566029	1.46052	0.0190738	20.9263	1.01793e-05	0.000110662	XP_013989312.1	LOC106566029	tubby-related protein 1-like	protein_coding	ssa12	79038963	79046264	+	TULP1
gene26984:106566008	-1.30234	1.31234	35.9399	1.54945e-08	4.48468e-07	XP_013989248.1	LOC106566008	zinc finger protein 454-like	protein_coding	ssa12	80227464	80257888	-
gene2707:106568012	1.77662	3.63103	41.3487	1.75788e-09	6.84425e-08	XP_013993472.1	LOC106568012	caspase-3-like	protein_coding	ssa01	136638230	136642742	+
gene2715:106567959	2.5157	1.77195	89.7885	7.21091e-17	2.42394e-14	XP_013993360.1	LOC106567959	fibroblast growth factor receptor 1-A-like	protein_coding	ssa01	136921140	136944793	+	FGFR1
gene27167:106566109	1.03119	5.37353	13.2986	0.00037148	0.00226173	XP_013989435.1	LOC106566109	tubulin beta-6 chain-like	protein_coding	ssa12	81690029	81694457	+	TUBB2B
gene27168:106566111	3.61573	3.58177	172.793	1.9364e-26	5.47856e-23	XP_013989436.1	LOC106566111	protein slowmo homolog 2-like	protein_coding	ssa12	81695770	81704494	+	PRELID3B
gene27174:106566118	1.21651	-0.0658532	9.80944	0.00210171	0.00943224	XP_013989444.1	LOC106566118	mitogen-activated protein kinase 14A-like	protein_coding	ssa12	82027988	82028936	+
gene27177:106566122	1.14659	3.07301	12.3685	0.000584726	0.00329658	XP_013989449.1	LOC106566122	protein FAM210A-like	protein_coding	ssa12	82071318	82083400	+	FAM210B
gene27186:106566138	-1.79733	0.609366	25.0217	1.6202e-06	2.32705e-05	XP_013989464.1	LOC106566138	zinc finger protein 2 homolog	protein_coding	ssa12	82727405	82728883	-	ZNF180
gene27189:106566139	-2.88796	-0.622301	25.5636	1.27574e-06	1.90721e-05	XP_013989465.1	LOC106566139	zinc finger protein 2 homolog	protein_coding	ssa12	82906113	82931486	+
gene27197:106566143	1.10016	2.59682	10.9616	0.0011756	0.00587818	XP_013989468.1	igsf8	immunoglobulin superfamily%2C member 8	protein_coding	ssa12	83366779	83381263	-	IGSF8
gene27227:106566176	1.12695	4.29916	28.2318	4.00045e-07	7.14086e-06	XP_013989524.1	LOC106566176	sperm-specific antigen 2 homolog	protein_coding	ssa12	84631129	84647122	+	TESPA1
gene27233:106566182	1.74281	6.6953	116.828	2.52647e-20	1.71552e-17	XP_013989531.1	LOC106566182	sodium- and chloride-dependent taurine transporter-like	protein_coding	ssa12	84983703	85024161	-	SLC6A6
gene2724:106568307	1.61204	-0.870339	10.1557	0.00176298	0.00818697	XP_013994004.1	LOC106568307	acyl-coenzyme A thioesterase 12-like	protein_coding	ssa01	137133229	137143674	-	ACOT12
gene27275:106566223	1.96208	0.108404	23.2725	3.52745e-06	4.50905e-05	XP_013989574.1	LOC106566223	LIM and cysteine-rich domains protein 1-like	protein_coding	ssa12	88736765	88767484	+	LMCD1
gene27286:106566241	1.7556	0.811579	19.2749	2.17169e-05	0.00021012	XP_013989607.1	LOC106566241	dual specificity protein phosphatase 7-like	protein_coding	ssa12	89797202	89817018	-	DUSP7
gene2731:106568345	-2.23495	3.94149	169.927	3.55155e-26	9.27528e-23	XP_013994089.1	LOC106568345	arrestin domain-containing protein 3-like	protein_coding	ssa01	137356230	137362796	-	ARRDC3
gene27348:106566301	1.47641	3.45342	12.4902	0.000551877	0.00314638	XP_013989680.1	LOC106566301	arginine-glutamic acid dipeptide repeats protein-like	protein_coding	ssa13	370784	425512	-	RERE
gene27382:106566330	2.17446	-0.612137	10.355	0.00159392	0.00754009					ssa13	2318476	2320689	-
gene27411:106566360	1.55836	1.353	11.7138	0.000807404	0.0043128	XP_013989770.1	LOC106566360	arginine-glutamic acid dipeptide repeats protein-like	protein_coding	ssa13	4390628	4589774	-	RERE
gene27412:106566362	1.64808	2.45953	14.4438	0.000212658	0.00142282	XP_013989772.1	LOC106566362	probable G-protein coupled receptor 61	protein_coding	ssa13	4696542	4705330	-	GPR61
gene27443:106566391	2.02135	4.14111	49.194	8.48644e-11	5.02261e-09	XP_013989840.1	LOC106566391	natterin-like protein	protein_coding	ssa13	5832858	5837468	+
gene27505:106566425	1.63684	1.00934	11.2981	0.000993284	0.00511032	XP_013989920.1	LOC106566425	zinc finger protein PLAGL2-like	protein_coding	ssa13	7079831	7133717	+
gene27536:106566450	1.35327	2.72526	11.3029	0.000992451	0.00510758	XP_013989978.1	LOC106566450	brefeldin A-inhibited guanine nucleotide-exchange protein 2-like	protein_coding	ssa13	8101256	8113685	-
gene27537:106566451	1.03578	4.40973	23.636	3.00799e-06	3.94901e-05	XP_013989980.1	LOC106566451	partitioning defective 6 homolog beta-like	protein_coding	ssa13	8118492	8150072	-	PARD6B
gene27572:106566482	-1.23193	6.02998	69.6368	5.19154e-14	7.76467e-12	XP_013990029.1	LOC106566482	serine/threonine-protein kinase pim-1-like	protein_coding	ssa13	9656123	9659521	-	PIM1
gene27580:106566494	3.14799	2.57714	84.2879	4.14034e-16	1.23306e-13	XP_013990051.1	slc6a8	solute carrier family 6 (neurotransmitter transporter)%2C member 8	protein_coding	ssa13	10329382	10356731	+	SLC6A8
gene27600:106566511	1.62231	-0.371913	16.5777	7.65834e-05	0.000605939	XP_013990079.1	LOC106566511	V-type proton ATPase subunit S1-like protein	protein_coding	ssa13	10741851	10755882	+	ATP6AP1L
gene27628:106566538	1.87441	-0.211914	13.7412	0.000298134	0.00188984	XP_013990116.1	LOC106566538	cyclin-dependent kinase 16-like	protein_coding	ssa13	12201664	12208268	-	CDK17
gene27656:100196047	1.46935	2.55331	13.3987	0.000353078	0.002163	XP_013990145.1	LOC100196047	nuclear receptor coactivator 6	protein_coding	ssa13	13418012	13433720	+	NCOA6
gene27710:106566660	-1.70741	-0.857505	11.0177	0.00114208	0.00574102					ssa13	16736922	16745594	-
gene2772:106568685	1.04843	3.28532	25.1606	1.52379e-06	2.20614e-05	XP_013994703.1	LOC106568685	prostaglandin E2 receptor EP4 subtype-like	protein_coding	ssa01	139586012	139594442	-	PTGER4
gene27730:106566645	1.30154	3.80134	38.2488	6.04729e-09	1.98177e-07	XP_013990341.1	LOC106566645	membrane-associated guanylate kinase%2C WW and PDZ domain-containing protein 1-like	protein_coding	ssa13	17177478	17369639	+	MAGI1
gene27776:106566761	1.43296	3.19417	20.2487	1.39349e-05	0.000144813	XP_013990602.1	LOC106566761	IQ motif and SEC7 domain-containing protein 1-like	protein_coding	ssa13	18852539	19082140	+	IQSEC1
gene2781:106568818	-1.74527	0.694475	17.2968	5.45692e-05	0.000454787	XP_013994976.1	LOC106568818	noelin-like	protein_coding	ssa01	140191608	140217402	+	OLFM1
gene27862:106566684	-1.43104	4.66626	39.9412	3.09417e-09	1.10929e-07	XP_013990433.1	LOC106566684	interleukin-17 receptor B-like	protein_coding	ssa13	22206269	22224385	+	IL17RB
gene27891:106566896	1.45478	1.41853	11.5526	0.000874887	0.00460516	XP_013990935.1	LOC106566896	vitamin D3 receptor A-like	protein_coding	ssa13	23348065	23454300	+
gene27904:106566885	-1.10167	3.67165	50.8749	4.35901e-11	2.84602e-09	XP_013990909.1	LOC106566885	DNA fragmentation factor subunit beta-like	protein_coding	ssa13	24349131	24353744	-	DFFB
gene27919:106566873	-1.10603	2.08669	28.5515	3.47095e-07	6.31861e-06					ssa13	25378023	25382031	-
gene27978:106566822	-1.34468	1.03436	22.6458	4.67298e-06	5.71834e-05	XP_013990732.1	LOC106566822	zinc finger protein PLAGL2-like	protein_coding	ssa13	26767803	26772727	+
gene28028:106566919	1.03866	0.850954	18.4122	3.23957e-05	0.000294239	XP_013990998.1	nat6	N-acetyltransferase 6 (GCN5-related)	protein_coding	ssa13	28534114	28535759	+	NAT6
gene28033:106566773	2.67786	1.8725	61.002	1.06204e-12	1.11572e-10	XP_013990630.1	LOC106566773	semaphorin-3B-like	protein_coding	ssa13	28744081	28826142	-	SEMA3B
gene28040:106566942	1.63474	1.44792	21.9566	6.37625e-06	7.45455e-05	XP_013991083.1	LOC106566942	serine/threonine-protein kinase 35-like	protein_coding	ssa13	29199109	29219908	-	STK35
gene28044:106567318	1.15324	2.06543	18.6903	2.84674e-05	0.000263926	XP_013991928.1	tnfrsf6b	tumor necrosis factor receptor superfamily%2C member 6b%2C decoy	protein_coding	ssa13	29364451	29367133	-
gene28096:106566991	-1.3844	1.36069	34.42	2.90224e-08	7.67997e-07	XP_013991195.1	LOC106566991	probable E3 ubiquitin-protein ligase makorin-2	protein_coding	ssa13	32569450	32575106	-
gene28170:106567064	1.09387	2.09524	10.9253	0.00119638	0.00596626	XP_013991387.1	LOC106567064	nuclear receptor subfamily 1 group D member 1-like	protein_coding	ssa13	35389136	35405617	-
gene28193:101448061	-1.28731	5.15657	30.9385	1.2652e-07	2.668e-06	XP_013991072.1	igfbp-6b2	insulin-like growth factor binding protein 6 paralog B2	protein_coding	ssa13	35905563	35987400	+
gene28200:106567082	-1.32438	2.08297	31.301	1.0724e-07	2.31757e-06	XP_013991432.1	LOC106567082	natural resistance-associated macrophage protein 2-like	protein_coding	ssa13	36098813	36109030	+	SLC11A2
gene28224:106567102	3.0272	-1.39457	11.249	0.00102405	0.00524478	XP_013991472.1	LOC106567102	UDP-glucuronosyltransferase 2A2-like	protein_coding	ssa13	36542904	36547428	-
gene28268:106567140	-1.18736	1.88904	32.5704	6.28013e-08	1.46239e-06	XP_013991572.1	LOC106567140	ATP-dependent RNA helicase DDX19B	protein_coding	ssa13	38039568	38046198	-
gene28336:100194884	1.08752	5.4556	20.1859	1.43856e-05	0.000148723	NP_001133385.1	cebpb	CCAAT/enhancer binding protein (C/EBP)%2C beta	protein_coding	ssa13	40482788	40484397	+	CEBPB
gene28420:106567273	-1.2622	-0.130485	13.674	0.00030803	0.00193557					ssa13	42500028	42500973	+
gene28423:106567274	2.21829	1.16334	20.5385	1.21835e-05	0.00012886	XP_013991853.1	lmod3	leiomodin 3 (fetal)	protein_coding	ssa13	42544316	42550413	-	LMOD3
gene28441:106567289	-2.6919	3.17755	28.0919	4.31098e-07	7.5914e-06	XP_013991906.1	LOC106567289	suppressor of cytokine signaling 2-like	protein_coding	ssa13	43407984	43411559	-
gene28456:106567364	-1.08335	2.62041	26.2367	9.49214e-07	1.48374e-05	XP_013991992.1	LOC106567364	zinc finger protein 175-like	protein_coding	ssa13	44441806	44475798	-	THAP10
gene28485:106567384	-1.28948	0.630273	21.0845	9.47137e-06	0.00010437	XP_013992032.1	LOC106567384	beta-citrylglutamate synthase B-like	protein_coding	ssa13	46289023	46327838	+	RIMKLB
gene28520:106567411	1.01286	3.3913	13.526	0.0003315	0.00205379	XP_013992086.1	zzef1	zinc finger%2C ZZ-type with EF-hand domain 1	protein_coding	ssa13	48657463	48711170	-	ZZEF1
gene28560:106567437	-1.05523	3.76492	33.2432	4.73763e-08	1.15968e-06	XP_013992157.1	LOC106567437	interleukin-12 subunit beta-like	protein_coding	ssa13	50587059	50591098	+	IL12B
gene28581:100534607	-2.68391	2.68855	59.0271	2.19524e-12	2.09257e-10	NP_001191824.1	il4/13a	interleukin 4/13A	protein_coding	ssa13	51820649	51821677	+
gene28638:106567530	1.03884	3.67058	12.7556	0.00048355	0.00281258	XP_013992363.1	LOC106567530	protein Jade-1-like	protein_coding	ssa13	55749275	55898117	+	JADE2
gene28642:106567534	-1.11081	1.01997	18.1943	3.58556e-05	0.000320604					ssa13	55958220	55962683	+
gene2866:106569712	1.38196	5.27632	70.2908	4.17514e-14	6.51975e-12	XP_013996760.1	ptges	prostaglandin E synthase	protein_coding	ssa01	143728252	143734628	-	PTGES
gene28692:106567574	1.82994	2.84577	69.2059	6.01733e-14	8.73053e-12	XP_013992524.1	LOC106567574	ubiquitin carboxyl-terminal hydrolase 2-like	protein_coding	ssa13	60542282	60595228	+
gene28718:106567597	-1.05552	3.424	114.074	5.40106e-20	3.52638e-17	XP_013992583.1	alkbh6	alkB homolog 6	protein_coding	ssa13	61971853	61995456	+	ALKBH6
gene28770:106567727	2.68088	4.38314	89.8779	7.51281e-17	2.45257e-14	XP_013992835.1	LOC106567727	zinc finger and BTB domain-containing protein 16-A-like	protein_coding	ssa13	67427085	67550893	+	ZBTB16
gene28784:106567714	1.18603	3.41414	70.1496	4.35705e-14	6.69349e-12	XP_013992800.1	LOC106567714	frizzled-9	protein_coding	ssa13	67815666	67818585	+	FZD9
gene28816:106567683	1.17512	5.31243	52.8705	2.06746e-11	1.49983e-09	XP_013992733.1	LOC106567683	ATP-sensitive inward rectifier potassium channel 15-like	protein_coding	ssa13	68754106	68757347	+	KCNJ15
gene2884:106569805	1.07971	2.96145	14.0118	0.0002617	0.00169529	XP_013996910.1	LOC106569805	probable helicase senataxin	protein_coding	ssa01	144167589	144217630	+	SETX
gene28895:106567990	-1.58058	0.399196	12.4758	0.000553629	0.00315373					ssa13	72533851	72535457	+
gene28905:100196068	-1.22525	2.73154	58.639	2.48273e-12	2.30935e-10	NP_001134569.1	pigl	phosphatidylinositol glycan anchor biosynthesis%2C class L	protein_coding	ssa13	72706240	72731103	-	PIGL
gene28907:100195809	-1.05886	0.532117	11.2161	0.00103417	0.00528864	NP_001134310.1	zswim7	zinc finger%2C SWIM-type containing 7	protein_coding	ssa13	72860760	72885524	+	ZSWIM7
gene28920:106567966	1.65194	1.19314	39.5384	3.58913e-09	1.26143e-07					ssa13	73699343	73709558	+
gene28921:106567965	3.30168	3.92186	190.722	3.5118e-28	1.19229e-24					ssa13	73766756	73805434	+
gene28941:106567948	1.71706	-0.488804	13.2836	0.000372573	0.00226645	XP_013993338.1	LOC106567948	diacylglycerol O-acyltransferase 2-like	protein_coding	ssa13	75160028	75180660	+	DGAT2
gene28976:106567910	1.2748	2.01362	25.0578	1.59453e-06	2.29584e-05					ssa13	76884846	76887559	-
gene28999:106567892	1.12627	1.87666	27.1637	6.33212e-07	1.05126e-05	XP_013993230.1	LOC106567892	E3 ubiquitin-protein ligase Siah2-like	protein_coding	ssa13	77293595	77319453	+
gene29052:106567843	1.16932	5.41495	66.893	1.33585e-13	1.79263e-11	XP_013993117.1	pde2a	phosphodiesterase 2A%2C cGMP-stimulated	protein_coding	ssa13	79090070	79124077	+	PDE2A
gene29065:106567835	-1.14381	3.50101	21.7942	6.8713e-06	7.93385e-05	XP_013993084.1	LOC106567835	transmembrane protease serine 13-like	protein_coding	ssa13	79534474	79541255	-	TMPRSS13
gene29128:106567782	1.07197	4.2797	17.1232	5.94477e-05	0.000489405	XP_013992986.1	LOC106567782	stAR-related lipid transfer protein 13-like	protein_coding	ssa13	81198282	81238039	+
gene29145:106567770	2.0666	0.340642	28.624	3.36425e-07	6.16801e-06	XP_013992964.1	LOC106567770	neuronal PAS domain-containing protein 2-like	protein_coding	ssa13	81970834	82043817	-	NPAS2
gene29160:106567762	-1.03726	5.54591	29.8075	2.03684e-07	4.02754e-06					ssa13	82718465	82719279	+
gene29251:106568203	2.00302	-1.00058	9.81106	0.00209998	0.009427	XP_013993810.1	LOC106568203	protein phosphatase Slingshot homolog 1-like	protein_coding	ssa13	86685401	86709989	-
gene29274:106568193	-1.08986	2.79803	49.8146	6.5074e-11	3.97361e-09	XP_013993796.1	LOC106568193	TP53-regulated inhibitor of apoptosis 1-like	protein_coding	ssa13	87522683	87524050	-	TRIAP1
gene2930:100195748	1.19307	0.800493	18.7342	2.78937e-05	0.000259671	NP_001134249.1	gnds	Ral guanine nucleotide dissociation stimulator	protein_coding	ssa01	145719581	145722649	-
gene29303:106568170	-1.09259	2.07882	29.6487	2.16658e-07	4.24943e-06	XP_013993735.1	LOC106568170	S-phase kinase-associated protein 2-like	protein_coding	ssa13	88868896	88875359	-	SKP2
gene29339:106568146	2.39375	2.85875	37.0497	1.00081e-08	3.11159e-07	XP_013993696.1	LOC106568146	heat shock protein beta-11-like	protein_coding	ssa13	90404527	90405588	-
gene29396:106568333	-1.04224	3.37841	11.7861	0.000779934	0.00418516					ssa13	91938531	91940267	-
gene29407:106568326	-1.51196	0.343354	20.6041	1.17915e-05	0.00012534					ssa13	92119378	92123079	-
gene29461:106568411	-1.15605	4.52472	108.236	2.85534e-19	1.56523e-16	XP_013994204.1	LOC106568411	spindlin-Z-like	protein_coding	ssa13	94896915	94914248	+
gene29462:106568409	-1.36234	0.318816	11.2436	0.00102006	0.00522908	XP_013994200.1	LOC106568409	nucleoredoxin-like protein 2	protein_coding	ssa13	94914494	94916437	+	NXNL2
gene29476:106568397	1.16165	0.664088	10.5776	0.00142464	0.00687533	XP_013994179.1	arl15	ADP-ribosylation factor-like 15	protein_coding	ssa13	95389100	95448144	-	ARL15
gene29477:106568395	1.32914	1.37932	11.2748	0.00100429	0.00515915	XP_013994178.1	LOC106568395	sorting nexin-18-like	protein_coding	ssa13	95448900	95453894	+	SNX18
gene29483:106568389	-1.06582	0.781941	11.0631	0.00111642	0.00563316	XP_013994170.1	LOC106568389	progestin and adipoQ receptor family member 3-like	protein_coding	ssa13	95551034	95558536	+	PAQR3
gene29487:106568415	1.05987	0.67427	10.8483	0.00124335	0.00615529					ssa13	95598683	95613948	+
gene29489:106568383	-1.15159	0.386317	14.0055	0.000262256	0.00169791	XP_013994158.1	morn5	MORN repeat containing 5	protein_coding	ssa13	95649974	95668586	-	MORN5
gene29506:106568426	1.79758	0.350922	11.2267	0.00102893	0.00526577	XP_013994224.1	LOC106568426	long-chain fatty acid transport protein 4-like	protein_coding	ssa13	96596336	96620666	+
gene29527:106568450	1.57113	2.01618	12.1426	0.000653827	0.00361754	XP_013994266.1	LOC106568450	uncharacterized LOC106568450	protein_coding	ssa13	97327253	97328454	-
gene29528:106568449	2.00485	0.672853	17.3506	5.32233e-05	0.00044507	XP_013994265.1	LOC106568449	endothelin-1 receptor-like	protein_coding	ssa13	97329720	97335073	-	EDNRA
gene29543:106568464	1.42402	1.29126	14.7586	0.000182322	0.00125246	XP_013994307.1	LOC106568464	CBP80/20-dependent translation initiation factor-like	protein_coding	ssa13	98233932	98236719	+
gene29553:106568491	1.13126	0.312638	9.96403	0.0019429	0.00885533	XP_013994360.1	s1pr3	sphingosine-1-phosphate receptor 3	protein_coding	ssa13	98850695	98855701	+	S1PR3
gene29598:106568520	2.01036	2.44058	10.5195	0.00147173	0.00705744	XP_013994416.1	LOC106568520	protein Shroom3-like	protein_coding	ssa13	101126415	101220506	+
gene29617:106568538	1.25638	4.43305	17.6971	4.55245e-05	0.000390501	XP_013994440.1	LOC106568538	cingulin-like protein 1	protein_coding	ssa13	102752587	102808709	-
gene29648:106568572	1.57772	1.03752	16.4158	8.26828e-05	0.000645474	XP_013994494.1	LOC106568572	ceramide glucosyltransferase-like	protein_coding	ssa13	104628922	104670349	+	UGCG
gene29654:106568580	1.71758	1.16557	17.342	5.3425e-05	0.000446427	XP_013994501.1	LOC106568580	A-kinase anchor protein 2-like	protein_coding	ssa13	104955382	104977206	+	PALM2-AKAP2
gene29655:106568577	1.55018	2.00034	13.006	0.0004274	0.00254056					ssa13	104981478	104984024	+
gene29707:106568790	-1.3721	1.06504	14.4967	0.000206828	0.00139188					ssa14	1945680	1950923	+
gene29728:106568643	1.53066	1.13112	12.3177	0.000598737	0.00336218	XP_013994613.1	LOC106568643	muscle-related coiled-coil protein-like	protein_coding	ssa14	4017656	4025087	-	MURC
gene29729:106568644	1.034	1.7794	17.0298	6.18714e-05	0.00050568	XP_013994614.1	tmeff1	transmembrane protein with EGF-like and two follistatin-like domains 1	protein_coding	ssa14	4060069	4152668	-	TMEFF1
gene2974:106571108	1.40722	3.05632	36.1632	1.41373e-08	4.15564e-07	XP_013999266.1	LOC106571108	GTPase IMAP family member 4-like	protein_coding	ssa01	147431193	147433445	-	GIMAP7
gene29744:106568655	1.29418	0.615054	10.5335	0.00145662	0.00700081	XP_013994632.1	LOC106568655	erythroferrone-like	protein_coding	ssa14	4513567	4537684	-
gene29753:106568664	-1.03126	2.91037	43.2057	8.34847e-10	3.59694e-08	XP_013994650.1	LOC106568664	polycomb complex protein BMI-1-B-like	protein_coding	ssa14	5066792	5073425	-	COMMD3-BMI1
gene29761:106568670	1.15438	0.34495	9.75211	0.00216394	0.00965287	XP_013994669.1	LOC106568670	phakinin-like	protein_coding	ssa14	5300411	5306381	-	BFSP2
gene29763:100195489	1.67509	6.12789	42.3616	1.19972e-09	4.90745e-08	NP_001133990.1	ccr9	C-C chemokine receptor type 9	protein_coding	ssa14	5372143	5375220	+	CCR9
gene29764:106568676	-1.07238	2.94212	33.6557	3.98823e-08	1.00299e-06					ssa14	5396661	5399335	-
gene29771:106568778	1.57762	-0.251112	11.9935	0.000702523	0.00383216	XP_013994917.1	LOC106568778	neogenin-like	protein_coding	ssa14	6235157	6247949	+	NEO1
gene29789:106568698	1.5206	-0.00234793	19.1712	2.27829e-05	0.00021838					ssa14	7829133	7830573	-
gene2979:100136908	1.47939	7.74691	25.8857	1.1229e-06	1.71652e-05	NP_001117155.1	nkcc1a	Na/K/2Cl co-transporter	protein_coding	ssa01	147535344	147613923	-	SLC12A2
gene29843:106568745	-1.45628	1.42006	20.2356	1.39579e-05	0.00014498	XP_013994831.1	LOC106568745	apoptosis-associated speck-like protein containing a CARD	protein_coding	ssa14	9931173	9933935	+	PYCARD
gene29944:106568987	-1.16268	2.47841	59.4486	1.85388e-12	1.82968e-10	XP_013995396.1	LOC106568987	volume-regulated anion channel subunit LRRC8D-like	protein_coding	ssa14	11428057	11436318	+	LRRC8D
gene29966:106568966	1.06475	1.35597	16.7638	7.01385e-05	0.000563707	XP_013995335.1	LOC106568966	abhydrolase domain-containing protein 8-like	protein_coding	ssa14	12339403	12359191	-	ABHD8
gene29984:106569003	3.4431	0.34637	52.4839	2.38355e-11	1.69652e-09	XP_013995411.1	LOC106569003	transforming growth factor beta-1-like	protein_coding	ssa14	12903028	12906628	-	GDF15
gene29990:106568946	-1.39281	-0.354763	11.5822	0.00086162	0.00455156	XP_013995287.1	LOC106568946	ras-related protein Rab-3A-like	protein_coding	ssa14	13149477	13174079	+	RAB3A
gene29991:106568945	1.48146	4.59091	46.7199	2.15089e-10	1.10644e-08	XP_013995286.1	LOC106568945	transcription factor jun-D-like	protein_coding	ssa14	13174442	13176279	-	JUND
gene29994:106568943	1.17476	1.72915	29.5745	2.23647e-07	4.37136e-06	XP_013995279.1	LOC106568943	homer protein homolog 3-like	protein_coding	ssa14	13209384	13267365	+	HOMER3
gene30016:106568924	1.60093	1.63445	21.2273	8.87564e-06	9.87343e-05	XP_013995236.1	LOC106568924	T-cell acute lymphocytic leukemia protein 1-like	protein_coding	ssa14	14095382	14101816	-	TAL1
gene30070:106568884	-1.23413	3.99592	42.7128	1.01377e-09	4.2703e-08	XP_013995140.1	lhx8	LIM homeobox 8	protein_coding	ssa14	15636789	15640411	+	LHX8
gene30097:100301980	1.83917	1.76365	51.1045	3.99794e-11	2.64074e-09	XP_013995070.1	per2	period circadian protein homolog 2	protein_coding	ssa14	16736792	16772678	+	PER2
gene30132:106568833	-1.37698	1.29706	23.6274	3.00992e-06	3.94901e-05	XP_013995011.1	LOC106568833	frizzled-8-like	protein_coding	ssa14	18892400	18895001	-	FZD8
gene30146:106568819	1.25982	1.84886	11.0266	0.00113747	0.00572358	XP_013994979.1	LOC106568819	nuclear receptor coactivator 2-like	protein_coding	ssa14	20018110	20074501	+	NCOA2
gene30199:106569059	1.08493	1.29878	14.2151	0.000236946	0.001553					ssa14	20997835	20999321	+
gene30211:106569065	1.52227	3.17523	55.5452	7.6679e-12	6.18368e-10	XP_013995484.1	LOC106569065	laminin subunit gamma-2-like	protein_coding	ssa14	21271508	21286231	-	LAMC2
gene30226:106569078	-1.36972	1.12073	24.7751	1.8069e-06	2.55395e-05	XP_013995535.1	LOC106569078	uncharacterized LOC106569078	protein_coding	ssa14	22558694	22563554	+
gene3025:106571505	1.25186	3.13801	13.2384	0.000381847	0.00231295	XP_014000153.1	map3k1	mitogen-activated protein kinase kinase kinase 1%2C E3 ubiquitin protein ligase	protein_coding	ssa01	149904681	149962314	+	MAP3K1
gene30275:106569234	-1.25115	0.527248	14.8045	0.000178337	0.00122913	XP_013995869.1	LOC106569234	protein canopy-1-like	protein_coding	ssa14	24758054	24783104	-
gene30307:106569207	1.47512	4.04538	26.8411	7.36067e-07	1.19628e-05	XP_013995804.1	LOC106569207	solute carrier family 12 member 7-like	protein_coding	ssa14	25773988	25816401	-	SLC12A7
gene30314:106569201	-1.28604	-0.0866274	12.1433	0.000652327	0.00361232	XP_013995792.1	LOC106569201	cell division cycle protein 20 homolog	protein_coding	ssa14	26056803	26062179	+
gene30344:106569175	-1.68484	1.54838	34.869	2.40959e-08	6.55485e-07	XP_013995708.1	LOC106569175	proteasome subunit alpha type-7-like	protein_coding	ssa14	27557884	27578123	+	PSMA7
gene30351:106569167	1.25792	1.34608	9.8136	0.00209731	0.00941751	XP_013995696.1	LOC106569167	solute carrier family 22 member 23-like	protein_coding	ssa14	28359232	28442229	-	SLC22A23
gene30373:106569150	2.53899	0.229608	17.4155	5.16613e-05	0.000433611	XP_013995658.1	LOC106569150	myosin light chain kinase 2%2C skeletal/cardiac muscle-like	protein_coding	ssa14	29467225	29506256	-	MYLK4
gene30398:100196464	1.0258	6.93311	69.8874	4.76525e-14	7.22507e-12	NP_001134965.1	cebpd	CCAAT/enhancer binding protein (C/EBP)%2C delta	protein_coding	ssa14	30231124	30232621	-	CEBPD
gene30417:106569346	1.03056	3.27722	24.9989	1.6366e-06	2.34448e-05	XP_013996111.1	LOC106569346	autophagy-related protein 9A-like	protein_coding	ssa14	31076707	31092877	+	ATG9A
gene30427:106569339	-1.05301	2.06796	29.0449	2.8069e-07	5.30988e-06					ssa14	31521470	31523190	+
gene30432:106569334	1.37031	6.68193	80.6694	1.31491e-15	3.31408e-13	XP_013996051.1	LOC106569334	HIG1 domain family member 1A%2C mitochondrial-like	protein_coding	ssa14	31584020	31588396	+	HIGD1A
gene30455:106569312	1.52167	3.27852	46.0109	2.79355e-10	1.39067e-08	XP_013996010.1	LOC106569312	epidermal growth factor receptor-like	protein_coding	ssa14	32516948	32590272	-	EGFR
gene30492:106569402	-1.02888	3.63734	77.6421	3.53391e-15	7.69101e-13	XP_013996213.1	LOC106569402	fizzy-related protein homolog	protein_coding	ssa14	33651094	33658994	-	FZR1
gene30511:106569389	-1.06757	1.2719	29.2016	2.62416e-07	5.01086e-06	XP_013996192.1	LOC106569389	oocyte zinc finger protein XlCOF8.4-like	protein_coding	ssa14	33929341	33932281	-
gene30519:106569380	-1.20213	5.0754	103.49	1.13796e-18	5.68159e-16	XP_013996173.1	LOC106569380	nectin-4-like	protein_coding	ssa14	34052462	34062753	-
gene30528:106569372	-1.17445	1.14805	22.218	5.66623e-06	6.73579e-05	XP_013996162.1	LOC106569372	leukotriene B4 receptor 1-like	protein_coding	ssa14	34199449	34205099	+	LTB4R
gene30553:106569442	1.31264	2.85211	37.774	7.32312e-09	2.34333e-07	XP_013996272.1	LOC106569442	zinc-binding protein A33-like	protein_coding	ssa14	34765043	34768878	-
gene30554:106569441	1.19466	1.50395	12.0812	0.000672679	0.00370208	XP_013996270.1	LOC106569441	myosin heavy chain%2C striated muscle-like	protein_coding	ssa14	34770748	34791015	-
gene30573:106569491	1.02002	0.404375	9.91757	0.00198929	0.00902316	XP_013996359.1	LOC106569491	C-X-C chemokine receptor type 4-like	protein_coding	ssa14	35570789	35572347	-
gene30598:106569487	5.14602	6.86431	59.4789	2.01989e-12	1.94822e-10	XP_013996353.1	LOC106569487	carbonic anhydrase 4-like	protein_coding	ssa14	36255144	36267130	+
gene30622:106569508	1.83895	2.51265	11.708	0.000812325	0.00433266	XP_013996397.1	LOC106569508	glutamate decarboxylase 1-like	protein_coding	ssa14	37354027	37380008	-
gene30625:106569509	-1.32653	1.25753	18.6885	2.8492e-05	0.000264082					ssa14	37581867	37585410	-
gene30630:106569515	1.08257	4.68347	15.9561	0.000103331	0.000776146	XP_013996421.1	LOC106569515	GRAM domain-containing protein 3-like	protein_coding	ssa14	37940082	37964085	+
gene30655:106569540	-1.23709	4.19748	108.232	2.85837e-19	1.56523e-16	XP_013996472.1	plekhj1	pleckstrin homology domain containing%2C family J member 1	protein_coding	ssa14	38772624	38775514	+	PLEKHJ1
gene30663:106569547	1.88938	2.88056	63.1602	4.93386e-13	5.60232e-11	XP_013996482.1	LOC106569547	uncharacterized LOC106569547	protein_coding	ssa14	39069729	39093570	-
gene30708:106569597	1.95479	1.87083	33.0449	5.14735e-08	1.24383e-06	XP_013996587.1	LOC106569597	ski-like protein	protein_coding	ssa14	40804609	40839997	-	SKIL
gene30725:106569611	1.5708	0.405045	12.4936	0.000548799	0.00313358	XP_013996621.1	LOC106569611	nicotinamide riboside kinase 2-like	protein_coding	ssa14	41360703	41363731	-
gene30762:106569650	-2.5197	0.319922	14.4608	0.000210796	0.00141382	XP_013996683.1	LOC106569650	uncharacterized LOC106569650	protein_coding	ssa14	42533497	42542445	+
gene308:106568770	1.1695	1.71665	22.4376	5.13201e-06	6.19398e-05	XP_013994929.1	hnrnpu	heterogeneous nuclear ribonucleoprotein U (scaffold attachment factor A)	protein_coding	ssa01	14797024	14810168	-	HNRNPU
gene30924:106569803	1.9318	1.8804	13.238	0.000382319	0.0023154	XP_013996903.1	LOC106569803	xin actin-binding repeat-containing protein 1-like	protein_coding	ssa14	49032393	49052108	+
gene30968:100194706	1.28765	2.78709	10.6561	0.00137241	0.00667544	NP_001133229.1	LOC100194706	uncharacterized LOC100194706	protein_coding	ssa14	51033368	51035574	-
gene3100:106572231	1.06284	2.95165	15.0011	0.00016234	0.00113387	XP_014001716.1	fech	ferrochelatase	protein_coding	ssa01	153957541	153972478	-	FECH
gene31031:106570076	1.47499	1.21504	15.2993	0.000140669	0.00100608	XP_013997513.1	LOC106570076	RNA-binding motif%2C single-stranded-interacting protein 3	protein_coding	ssa14	53770736	54001399	+	RBMS3
gene31079:106570042	-1.1293	3.64301	36.2857	1.34444e-08	3.99246e-07	XP_013997443.1	LOC106570042	uncharacterized LOC106570042	protein_coding	ssa14	56043540	56135967	-	AIM1L
gene31104:106570142	-1.29377	0.364445	15.1664	0.000149908	0.00105965					ssa14	56959590	56962541	+
gene31164:106569978	1.38299	1.77326	13.6998	0.000304316	0.00191828	XP_013997257.1	LOC106569978	glycogen synthase kinase-3 beta-like	protein_coding	ssa14	58576617	58598518	-	GSK3A
gene3122:106572396	1.45757	1.27841	13.6586	0.000310347	0.0019469	XP_014001998.1	hook3	hook microtubule-tethering protein 3	protein_coding	ssa01	155183129	155237093	-
gene31220:106569927	-1.92476	0.207953	16.1981	9.16696e-05	0.000701595	XP_013997153.1	LOC106569927	tumor necrosis factor receptor superfamily member 11B-like	protein_coding	ssa14	60060282	60063052	+
gene31238:106569908	-1.26139	1.96547	34.8353	2.44351e-08	6.62087e-07	XP_013997109.1	LOC106569908	BCL2/adenovirus E1B 19 kDa protein-interacting protein 2-like	protein_coding	ssa14	60750901	60763723	-	BNIPL
gene31261:106569878	1.62302	1.18661	41.6101	1.56857e-09	6.22132e-08	XP_013997063.1	LOC106569878	atrial natriuretic peptide receptor 1-like	protein_coding	ssa14	61203327	61322468	-	NPR1
gene31270:106569876	-1.40633	1.54193	49.9164	6.26107e-11	3.84393e-09	XP_013997058.1	LOC106569876	transcription intermediary factor 1-beta-like	protein_coding	ssa14	61557903	61571030	-
gene31297:106569859	2.33513	-0.456776	14.5188	0.000204703	0.00138141					ssa14	62664186	62665279	-
gene31303:106569856	-1.13741	2.06584	22.4593	5.08227e-06	6.14269e-05	XP_013997013.1	LOC106569856	frizzled-1-like	protein_coding	ssa14	62931990	62935603	+	FZD1
gene31305:106569851	1.26902	3.23763	11.631	0.000843163	0.00447215	XP_013997004.1	LOC106569851	A-kinase anchor protein 9-like	protein_coding	ssa14	62988992	63178577	+	AKAP9
gene31405:106570277	-1.64359	-0.106219	23.8909	2.67616e-06	3.57992e-05	XP_013997890.1	LOC106570277	nuclear inhibitor of protein phosphatase 1-like	protein_coding	ssa14	67981377	67990806	-	PPP1R8
gene3141:106572527	1.15504	1.90124	17.3342	5.36193e-05	0.00044783	XP_014002246.1	LOC106572527	lysophosphatidic acid receptor 1-like	protein_coding	ssa01	156193826	156276639	+	LPAR1
gene31417:106570283	-1.35523	2.47301	67.3595	1.13652e-13	1.54964e-11	XP_013997908.1	nkiras1	NFKB inhibitor interacting Ras-like 1	protein_coding	ssa14	68231818	68236641	-	NKIRAS1
gene31424:106570303	-1.09835	1.41183	21.5846	7.54626e-06	8.58014e-05	XP_013997952.1	oxsm	3-oxoacyl-ACP synthase%2C mitochondrial	protein_coding	ssa14	68808995	68817189	+
gene31433:106570295	1.70733	0.0520912	16.1444	9.4036e-05	0.000717176	XP_013997932.1	LOC106570295	protachykinin-like	protein_coding	ssa14	69043512	69048994	-	TAC1
gene31457:100136469	-1.74754	5.32589	47.26	1.78049e-10	9.37199e-09	XP_013997967.1	LOC100136469	anterior gradient-2-like protein 2	protein_coding	ssa14	70642734	70645697	-
gene31486:106570356	1.68329	4.17136	28.2877	3.94429e-07	7.05174e-06	XP_013998047.1	LOC106570356	serine/threonine-protein kinase Sgk1-like	protein_coding	ssa14	71742049	71748916	-	SGK1
gene31487:106570357	-1.06853	3.09086	48.2481	1.18133e-10	6.55038e-09	XP_013998050.1	LOC106570357	uncharacterized LOC106570357	protein_coding	ssa14	71825555	71828301	+
gene31494:106570363	1.01592	2.22539	19.4237	2.02747e-05	0.00019883	XP_013998065.1	LOC106570363	enhancer of filamentation 1-like	protein_coding	ssa14	72304846	72353439	+	NEDD9
gene31506:106570372	-1.17072	-0.396824	13.808	0.000288624	0.0018402	XP_013998096.1	stpg1	sperm-tail PG-rich repeat containing 1	protein_coding	ssa14	72570482	72576127	-	STPG1
gene31586:106570457	-1.10225	2.87281	27.4073	5.6956e-07	9.59645e-06	XP_013998294.1	tfpi2	tissue factor pathway inhibitor 2	protein_coding	ssa14	77649752	77655685	-	TFPI2
gene31634:106570503	-1.00951	3.9598	19.4102	2.04425e-05	0.000200145	XP_013998384.1	LOC106570503	histone acetyltransferase KAT2B-like	protein_coding	ssa14	79123110	79137784	-	KAT2B
gene31643:106570515	-1.35435	0.585027	19.7741	1.72523e-05	0.000172866	XP_013998408.1	LOC106570515	sorting nexin-10A-like	protein_coding	ssa14	79560108	79575625	+	SNX10
gene31644:106570516	1.18249	4.53972	19.3345	2.12615e-05	0.000206538	XP_013998409.1	ankrd12	ankyrin repeat domain 12	protein_coding	ssa14	79728270	79775425	-	ANKRD12
gene31664:106570526	1.10182	1.34352	10.7571	0.00130161	0.00638846	XP_013998418.1	LOC106570526	cyclic AMP-responsive element-binding protein 5-like	protein_coding	ssa14	80131047	80159000	+	CREB5
gene31680:106570536	-1.46038	-0.15433	13.4877	0.000337265	0.00208326	XP_013998447.1	LOC106570536	deleted in azoospermia-like	protein_coding	ssa14	80528903	80541675	-	DAZL
gene31683:106570539	-1.18517	-0.125394	11.5354	0.000881904	0.00463491	XP_013998453.1	LOC106570539	DNA-binding protein SATB1-like	protein_coding	ssa14	80647245	80701201	-	SATB1
gene31684:106570546	1.41948	2.30156	10.2627	0.00167277	0.00784313	XP_013998462.1	LOC106570546	collagen alpha-1(XVI) chain-like	protein_coding	ssa14	80769376	80818417	+	COL16A1
gene31700:106570566	1.32667	1.1273	11.1801	0.00105291	0.0053683	XP_013998492.1	LOC106570566	phosphoprotein associated with glycosphingolipid-enriched microdomains 1-like	protein_coding	ssa14	82946730	82962925	+	PAG1
gene31716:106570575	1.07993	3.89103	27.9138	4.57582e-07	7.98323e-06	XP_013998498.1	LOC106570575	ataxin-1-like	protein_coding	ssa14	83491190	83589875	-
gene31739:106570615	1.673	2.35711	21.1932	9.03424e-06	0.000100203	XP_013998555.1	LOC106570615	pumilio homolog 1-like	protein_coding	ssa14	84367036	84407478	+	PUM1
gene31747:106570607	1.07586	2.51971	35.4959	1.86011e-08	5.25834e-07	XP_013998544.1	LOC106570607	E3 ubiquitin-protein ligase ZNRF2-like	protein_coding	ssa14	84525445	84529856	+
gene31750:106570609	1.4249	3.59008	20.202	1.42616e-05	0.000147666	XP_013998546.1	LOC106570609	protein FAM83H-like	protein_coding	ssa14	84552873	84564975	-	FAM83H
gene31764:106570630	1.15755	1.16716	10.8457	0.00124493	0.00616132	XP_013998570.1	LOC106570630	CLIP-associating protein 2-like	protein_coding	ssa14	85158762	85166915	+	CLASP2
gene31818:106570678	1.33324	0.456209	13.522	0.00033169	0.00205459	XP_013998624.1	LOC106570678	regulator of G-protein signaling 1-like	protein_coding	ssa14	87076857	87092033	-
gene3188:106572881	1.6685	0.30769	11.0552	0.00112082	0.00564916	XP_014002910.1	LOC106572881	A-kinase anchor protein 2-like	protein_coding	ssa01	159020753	159035415	-	PALM2-AKAP2
gene31921:106570782	1.47556	0.654746	10.2611	0.00167138	0.0078388	XP_013998754.1	LOC106570782	protein FAM91A1-like	protein_coding	ssa14	93206225	93214862	-
gene31934:106570794	1.16907	1.78934	10.0418	0.00186813	0.00858135	XP_013998806.1	LOC106570794	uncharacterized LOC106570794	protein_coding	ssa14	93650431	93678343	+
gene3194:106572931	1.97462	-0.312851	16.1818	9.23792e-05	0.00070607	XP_014002997.1	LOC106572931	DEP domain-containing mTOR-interacting protein-like	protein_coding	ssa02	66500	95805	+	DEPTOR
gene320:106570052	3.26167	-0.0977096	26.6288	7.99602e-07	1.27993e-05	XP_013997503.1	LOC106570052	phosphatidate phosphatase LPIN1-like	protein_coding	ssa01	15335148	15369861	-	LPIN1
gene32021:100196070	-2.13028	-0.734133	12.5225	0.000541046	0.00309765	NP_001134571.1	cxl13	C-X-C motif chemokine 13	protein_coding	ssa15	3584870	3586096	+	CXCL13
gene32042:106570903	-1.78245	3.42337	55.7018	7.26255e-12	5.92718e-10	XP_013998953.1	LOC106570903	granzyme A-like	protein_coding	ssa15	4847116	4849394	-	GZMA
gene32049:106570905	1.67572	2.80506	38.4039	5.6753e-09	1.87252e-07	XP_013998958.1	LOC106570905	ras-GEF domain-containing family member 1B-A-like	protein_coding	ssa15	5316416	5387057	-
gene32056:106570917	1.62163	1.99233	13.0014	0.00042851	0.00254644	XP_013998975.1	wdfy3	WD repeat and FYVE domain containing 3	protein_coding	ssa15	5845886	6004778	-	WDFY3
gene3206:106573032	1.88075	0.0100804	13.2761	0.000373942	0.00227318	XP_014003122.1	LOC106573032	neurobeachin-like protein 2	protein_coding	ssa02	536618	548294	+
gene32067:106570928	1.29637	2.81255	13.7386	0.000299101	0.00189384	XP_013998993.1	LOC106570928	PDZ domain-containing protein 2-like	protein_coding	ssa15	7097897	7145245	+
gene32077:106570939	1.68157	1.58774	16.4692	8.06816e-05	0.000633199	XP_013999013.1	LOC106570939	atrial natriuretic peptide receptor 3-like	protein_coding	ssa15	7722159	7755480	-	NPR3
gene32078:106570940	1.0441	3.24602	9.96535	0.00194444	0.00885761	XP_013999014.1	LOC106570940	atrial natriuretic peptide receptor 3-like	protein_coding	ssa15	7796005	7827622	+	NPR3
gene32079:106570941	1.10368	3.0613	10.0024	0.00190836	0.00873426	XP_013999017.1	kank1	KN motif and ankyrin repeat domains 1	protein_coding	ssa15	7888289	8029863	-	KANK1
gene321:106570236	1.10826	0.690264	13.6608	0.000310015	0.00194553	XP_013997844.1	LOC106570236	protein GREB1-like	protein_coding	ssa01	15382911	15474560	-	GREB1
gene32253:106571103	-1.26512	4.71823	38.765	4.93047e-09	1.66562e-07	XP_013999255.1	LOC106571103	gremlin-1-like	protein_coding	ssa15	19490271	19491824	-
gene32285:106571130	1.05129	2.0065	9.85477	0.00205408	0.00925586	XP_013999314.1	LOC106571130	zinc finger and BTB domain-containing protein 1-like	protein_coding	ssa15	21070959	21074962	-	ZBTB1
gene32325:106571174	1.092	0.749345	10.6461	0.00137633	0.00668975	XP_013999403.1	LOC106571174	leucine-rich alpha-2-glycoprotein-like	protein_coding	ssa15	23164340	23168029	+	LRG1
gene32429:106571278	-1.08762	1.4516	14.1075	0.00024961	0.00162534	XP_013999622.1	LOC106571278	uncharacterized LOC106571278	protein_coding	ssa15	27711009	27724274	-
gene32435:106571284	-1.59996	2.24722	66.5587	1.50018e-13	1.98956e-11	XP_013999658.1	LOC106571284	small integral membrane protein 8-like	protein_coding	ssa15	27826260	27826902	+	SMIM8
gene32436:106571281	1.14688	0.235843	12.8604	0.000458277	0.00269428	XP_013999652.1	LOC106571281	uncharacterized LOC106571281	protein_coding	ssa15	27827535	27843377	+
gene32438:100194525	-1.19817	1.5416	32.5842	6.24374e-08	1.45592e-06	XP_013999557.1	slc35a1	solute carrier family 35 (CMP-sialic acid transporter)%2C member A1	protein_coding	ssa15	27860417	27871278	+	SLC35A1
gene32477:106571318	1.04033	4.21849	53.1027	1.89243e-11	1.37875e-09	XP_013999726.1	LOC106571318	solute carrier family 22 member 6-A-like	protein_coding	ssa15	29896223	29909184	+
gene32520:106571363	-1.33341	1.47156	16.5303	7.83182e-05	0.000617237					ssa15	31437057	31438798	+
gene32522:106571364	-1.10581	4.33254	25.7965	1.15581e-06	1.76079e-05	XP_013999842.1	LOC106571364	interleukin-22 receptor subunit alpha-1-like	protein_coding	ssa15	31505513	31512592	+	IL20RA
gene32551:106571384	-1.97233	-0.74559	15.7936	0.0001111	0.000825914	XP_013999881.1	LOC106571384	uncharacterized LOC106571384	protein_coding	ssa15	32890902	32900950	-
gene32601:106571544	-1.41493	-0.404978	12.9829	0.000431584	0.00256166	XP_014000176.1	LOC106571544	basic leucine zipper transcriptional factor ATF-like 3	protein_coding	ssa15	34983096	34988035	-	BATF3
gene32603:100196077	-1.39381	1.0726	27.246	6.10955e-07	1.02019e-05	NP_001134578.1	tatdn3	TatD DNase domain containing 3	protein_coding	ssa15	34993237	34996928	+	TATDN3
gene32664:106571469	-1.14044	0.923511	18.1228	3.70713e-05	0.000329306	XP_014000085.1	tlr5	toll-like receptor 5	protein_coding	ssa15	37256545	37264761	+	TLR5
gene32676:106571477	1.05069	6.03578	98.9987	4.31802e-18	1.8795e-15	XP_014000111.1	LOC106571477	estrogen-related receptor gamma-like	protein_coding	ssa15	37561539	37603977	+	ESRRG
gene3273:106573535	1.28733	1.79851	41.6056	1.57142e-09	6.22535e-08	XP_014004135.1	LOC106573535	beta-chimaerin-like	protein_coding	ssa02	2341123	2350260	+	CHN2
gene32751:106571687	1.16209	1.97982	40.6689	2.28186e-09	8.53208e-08					ssa15	41112198	41115368	-
gene32798:106571649	1.88303	-0.123193	18.1827	3.60501e-05	0.000322258	XP_014000430.1	LOC106571649	syntaxin-binding protein 6-like	protein_coding	ssa15	43576984	43583774	+
gene3283:106573582	1.00483	2.65763	18.6816	2.85832e-05	0.000264638	XP_014004221.1	LOC106573582	neurobeachin-like protein 2	protein_coding	ssa02	2477817	2486253	+
gene3285:106573598	-1.17952	0.360459	15.3763	0.000135581	0.000975404	XP_014004256.1	LOC106573598	chromatin target of PRMT1 protein-like	protein_coding	ssa02	2497496	2501546	+	CHTOP
gene32862:100380418	2.83463	5.46739	123.161	4.96129e-21	4.01049e-18	NP_001167173.1	hs90a	Heat shock protein HSP 90-alpha	protein_coding	ssa15	46687864	46698666	-	HSP90AA1
gene32863:106571588	1.70798	1.79283	20.3015	1.35593e-05	0.000141473	XP_014000307.1	LOC106571588	heat shock protein HSP 90-alpha 1-like	protein_coding	ssa15	46699126	46705169	-	HSP90AA1
gene32914:106571770	1.19159	2.86626	14.3629	0.000220907	0.0014637	XP_014000699.1	LOC106571770	ATPase family AAA domain-containing protein 2B-like	protein_coding	ssa15	49563242	49679114	-	ATAD2B
gene32915:106571769	1.16017	2.93819	14.761	0.000182349	0.00125246	XP_014000697.1	LOC106571769	major facilitator superfamily domain-containing protein 2B-like	protein_coding	ssa15	49717716	49756078	+
gene3292:106573644	1.26583	0.844962	11.0401	0.00112936	0.00568715	XP_014004359.1	LOC106573644	zinc finger and BTB domain-containing protein 7B-like	protein_coding	ssa02	2670958	2673728	+	ZBTB7B
gene32945:106571833	-1.82816	-0.554024	12.4333	0.000565338	0.00320645	XP_014000777.1	LOC106571833	zinc finger protein 431-like	protein_coding	ssa15	51782434	51808801	+
gene32956:106571808	1.06626	2.71206	13.6493	0.000311876	0.00195372	XP_014000750.1	LOC106571808	pre-mRNA-processing factor 17-like	protein_coding	ssa15	53296863	53323290	-	CDC40
gene32973:106571827	-1.66454	-0.353696	16.0694	9.74441e-05	0.000739412	XP_014000769.1	LOC106571827	zinc finger protein 850-like	protein_coding	ssa15	54714672	54765078	-	ZNF544
gene3299:106573691	1.06485	3.66551	28.6988	3.2575e-07	6.00777e-06	XP_014004449.1	LOC106573691	dentin sialophosphoprotein-like	protein_coding	ssa02	2807059	2811471	+
gene33022:106571856	1.4343	5.98547	39.8012	3.29947e-09	1.17096e-07	XP_014000832.1	LOC106571856	sodium- and chloride-dependent taurine transporter-like	protein_coding	ssa15	57001112	57021890	-	SLC6A6
gene33026:106571861	-1.1963	1.23276	23.5125	3.16843e-06	4.11166e-05	XP_014000840.1	LOC106571861	olfactory receptor 2T1-like	protein_coding	ssa15	57287572	57290236	-
gene33045:106571874	-1.338	3.21605	19.6685	1.81668e-05	0.000181087					ssa15	58482017	58483134	+
gene33109:106571946	1.29332	1.91585	23.9465	2.61063e-06	3.50398e-05	XP_014001015.1	LOC106571946	adenylate cyclase type 6-like	protein_coding	ssa15	61965160	62018458	+
gene3311:106573786	1.92902	3.28589	91.1949	4.65729e-17	1.66442e-14					ssa02	3201488	3208186	+
gene33124:106571957	-1.48666	-0.605322	10.1303	0.00178577	0.00826741	XP_014001044.1	LOC106571957	NADH dehydrogenase [ubiquinone] 1 alpha subcomplex subunit 4-like 2	protein_coding	ssa15	62385445	62390167	-	NDUFA4
gene33156:106572273	-1.39603	3.55488	19.7603	1.74382e-05	0.00017449					ssa15	63375014	63381827	-
gene33175:106572303	1.67609	4.94172	94.0198	1.96074e-17	7.92489e-15	XP_014001821.1	LOC106572303	helicase ARIP4-like	protein_coding	ssa15	63797421	63866977	-	RAD54L2
gene33208:106572232	-1.17689	2.41054	52.0532	2.80015e-11	1.94968e-09	XP_014001713.1	trappc6b	trafficking protein particle complex 6B	protein_coding	ssa15	65255512	65258001	+	TRAPPC6B
gene33222:106572218	1.67169	4.08895	39.1312	4.2883e-09	1.47734e-07	XP_014001684.1	LOC106572218	5'-nucleotidase domain-containing protein 2-like	protein_coding	ssa15	65609632	65632535	+	NT5DC2
gene33223:106572217	1.52702	1.50756	23.0052	3.9764e-06	4.98901e-05	XP_014001682.1	LOC106572217	TBC1 domain family member 25-like	protein_coding	ssa15	65658740	65685069	+	TBC1D25
gene33265:106572187	1.07926	2.63661	11.7939	0.00077614	0.0041681	XP_014001602.1	LOC106572187	tyrosine-protein phosphatase non-receptor type 11-like	protein_coding	ssa15	67608582	67667031	+	PTPN11
gene33266:106572190	-1.11808	2.27769	29.5468	2.26322e-07	4.41347e-06	XP_014001606.1	LOC106572190	RING finger protein 223-like	protein_coding	ssa15	67673326	67680561	-	RNF223
gene33277:106572176	1.41538	5.15683	78.6407	2.54536e-15	6.0473e-13	XP_014001570.1	stk35	serine/threonine kinase 35	protein_coding	ssa15	68218130	68243469	+	STK35
gene33278:106572175	-1.19402	0.582232	19.9388	1.59942e-05	0.000162386	XP_014001569.1	LOC106572175	mitochondrial carrier homolog 1-like	protein_coding	ssa15	68285616	68302411	+	MTCH1
gene33296:106572160	-1.21268	0.266233	13.7101	0.000302674	0.00191076					ssa15	69016062	69018839	-
gene33297:106572158	-1.6897	2.10268	63.4726	4.41865e-13	5.12477e-11	XP_014001540.1	LOC106572158	beta-citrylglutamate synthase B-like	protein_coding	ssa15	69018989	69044672	+	RIMKLB
gene33354:106572111	1.18088	3.8638	11.6974	0.000816291	0.00434853	XP_014001436.1	arfgef2	ADP-ribosylation factor guanine nucleotide-exchange factor 2 (brefeldin A-inhibited)	protein_coding	ssa15	71510384	71548054	-	ARFGEF2
gene33379:106572317	-1.6086	-0.331	13.0547	0.000416668	0.00248835	XP_014001830.1	LOC106572317	spore wall protein 2-like	protein_coding	ssa15	72225230	72226592	-	C2orf57
gene3346:106574068	1.11995	3.18986	44.0926	5.89482e-10	2.66137e-08	XP_014005085.1	LOC106574068	beta-chimaerin-like	protein_coding	ssa02	4409362	4410962	-
gene33460:106572020	1.8179	4.55997	113.903	5.66775e-20	3.63068e-17	XP_014001195.1	LOC106572020	ATPase family AAA domain-containing protein 3-like	protein_coding	ssa15	75700186	75714615	-	ATAD3A
gene33515:106572351	1.11046	3.74073	29.4151	2.39453e-07	4.6323e-06	XP_014001882.1	LOC106572351	specifically androgen-regulated gene protein-like	protein_coding	ssa15	79212281	79222724	-	C1orf116
gene33543:106572414	-2.75336	1.12711	94.0231	1.94906e-17	7.92489e-15	XP_014002032.1	LOC106572414	FERM domain-containing protein 4B-like	protein_coding	ssa15	80465617	80490663	+	FRMD4B
gene33583:106572433	-1.60662	0.41128	23.4235	3.29699e-06	4.25277e-05	XP_014002090.1	LOC106572433	PDZ domain-containing protein 4-like	protein_coding	ssa15	81938838	81971825	+	PDZD4
gene33585:106572434	2.39376	1.64131	24.8745	1.73912e-06	2.46946e-05	XP_014002093.1	LOC106572434	IQ motif and SEC7 domain-containing protein 2-like	protein_coding	ssa15	82000531	82070486	-	IQSEC2
gene33591:106572441	-1.19793	1.18301	28.5246	3.51144e-07	6.38548e-06	XP_014002100.1	LOC106572441	mitochondrial import inner membrane translocase subunit Tim17-B-like	protein_coding	ssa15	82151756	82154224	+	TIMM17B
gene33594:106572443	-1.93136	0.310033	18.1278	3.69856e-05	0.000328803	XP_014002102.1	LOC106572443	synaptophysin-like	protein_coding	ssa15	82213006	82226206	+	SYP
gene33633:106572480	1.56723	4.83764	45.7411	3.16255e-10	1.54049e-08	XP_014002178.1	LOC106572480	CCAAT/enhancer-binding protein beta-like	protein_coding	ssa15	82842963	82844663	-	CEBPB
gene33644:106572486	1.15506	1.53366	18.6877	2.85025e-05	0.000264107	XP_014002185.1	LOC106572486	transmembrane protein 198-like	protein_coding	ssa15	83045903	83050394	+
gene33663:106572529	1.06286	0.54438	10.3597	0.00159009	0.00752615	XP_014002245.1	LOC106572529	coenzyme Q-binding protein COQ10 homolog A%2C mitochondrial-like	protein_coding	ssa15	83488650	83491912	+	COQ10A
gene33675:106572511	1.56284	4.87011	30.5568	1.49541e-07	3.08636e-06	XP_014002216.1	LOC106572511	integrin alpha-5-like	protein_coding	ssa15	83717596	83795298	+	ITGA5
gene33684:106572541	1.1764	6.18851	14.144	0.000246691	0.00160818	XP_014002267.1	LOC106572541	uncharacterized LOC106572541	protein_coding	ssa15	84716716	84761936	+	CD34
gene33685:106572542	1.57974	1.06375	15.2636	0.00014309	0.00101932					ssa15	84755828	84757992	+
gene33708:106572558	-1.15037	2.03522	37.5923	7.88449e-09	2.49475e-07	XP_014002315.1	LOC106572558	ceramide-1-phosphate transfer protein-like	protein_coding	ssa15	85742412	85747288	-	CPTP
gene33738:106572630	-1.65163	1.96398	30.8656	1.28978e-07	2.71141e-06	XP_014002460.1	LOC106572630	sal-like protein 4	protein_coding	ssa15	87168782	87176948	+	SALL4
gene33829:106572673	1.1002	1.3596	16.3284	8.61779e-05	0.000666931	XP_014002529.1	LOC106572673	ankyrin repeat domain-containing protein 33-like	protein_coding	ssa15	90012283	90024150	-	ANKRD33
gene33851:106572711	1.24094	1.76736	12.7688	0.000479361	0.00279444	XP_014002611.1	LOC106572711	uncharacterized LOC106572711	protein_coding	ssa15	90976255	90982364	-
gene3388:106574328	1.92038	-0.782444	13.3019	0.000369252	0.00225112	XP_014005650.1	LOC106574328	myosin heavy chain%2C embryonic smooth muscle isoform-like	protein_coding	ssa02	5507786	5514846	+
gene33913:106572772	-1.9271	0.290876	34.4928	2.81591e-08	7.48654e-07					ssa15	93438427	93440511	+
gene33946:106572797	-1.09133	2.213	30.5961	1.44629e-07	3.0014e-06	XP_014002751.1	LOC106572797	uncharacterized LOC106572797	protein_coding	ssa15	94383327	94392408	-
gene33957:106572807	-1.06829	5.98024	46.3659	2.4427e-10	1.23779e-08	XP_014002771.1	LOC106572807	tumor necrosis factor receptor superfamily member 5-like	protein_coding	ssa15	94963568	94979084	+	CD40
gene3397:106574458	2.67645	1.69899	51.9765	2.88177e-11	1.99671e-09	XP_014005832.1	LOC106574458	nuclear receptor subfamily 4 group A member 3-like	protein_coding	ssa02	5574660	5616636	-
gene33987:106572840	-1.10253	1.02662	17.4565	5.06282e-05	0.000426838	XP_014002844.1	LOC106572840	transmembrane emp24 domain-containing protein 4-like	protein_coding	ssa15	96354751	96357300	+	TMED4
gene33996:100195428	2.33791	4.26665	33.0447	5.28807e-08	1.2724e-06	NP_001133929.1	mmp9	matrix metalloproteinase 9	protein_coding	ssa15	96737757	96746604	+	MMP9
gene34006:106572856	1.7373	-0.336616	12.1577	0.000647706	0.00359142					ssa15	97028615	97029303	-
gene34008:106572869	2.93832	0.517875	37.363	8.65581e-09	2.72357e-07	XP_014002888.1	LOC106572869	heat shock 70 kDa protein-like	protein_coding	ssa15	97078466	97081729	-	HSPA1B
gene34015:106572870	2.26389	2.46323	34.7632	2.53567e-08	6.84874e-07	XP_014002889.1	LOC106572870	extensin-like	protein_coding	ssa15	97285852	97289536	+
gene34016:106572862	1.34614	4.26682	23.3832	3.38387e-06	4.35008e-05	XP_014002879.1	LOC106572862	probable G-protein coupled receptor 61	protein_coding	ssa15	97289557	97292148	+	GPR61
gene34130:106572985	1.95563	1.02018	34.9416	2.33836e-08	6.38285e-07					ssa15	102852163	102861426	+
gene34144:106572998	1.36926	0.93943	9.95864	0.00194822	0.00887076	XP_014003068.1	LOC106572998	CD9 antigen-like	protein_coding	ssa15	103276744	103306031	-	TSPAN2
gene34197:106573050	-1.16513	0.151574	12.8696	0.000456221	0.00268396					ssa16	3023283	3026541	+
gene34251:100306852	-1.08389	5.2362	42.3821	1.1579e-09	4.74782e-08	NP_001158863.1	ccnd1	cyclin D1	protein_coding	ssa16	5581255	5593319	+	CCND1
gene3426:106574762	1.52389	4.78658	34.1635	3.28491e-08	8.48106e-07	XP_014006293.1	LOC106574762	protein asteroid homolog 1-like	protein_coding	ssa02	6238141	6240921	-	ASTE1
gene34261:106573102	-1.06668	1.97035	32.3939	6.76343e-08	1.55995e-06	XP_014003278.1	cssa16h11orf49	chromosome ssa16 open reading frame%2C human C11orf49	protein_coding	ssa16	6246191	6256142	-	C11orf49
gene3427:106574776	1.24595	1.24919	20.0055	1.5512e-05	0.000158153	XP_014006319.1	LOC106574776	protein asteroid homolog 1-like	protein_coding	ssa02	6241896	6243222	+
gene34283:106573116	1.11651	4.78581	43.6776	6.93586e-10	3.06614e-08	XP_014003299.1	LOC106573116	dual specificity protein phosphatase 6-like	protein_coding	ssa16	8114561	8119050	-	DUSP6
gene3430:106574784	3.2196	5.66535	85.6124	3.02583e-16	9.09114e-14	XP_014006346.1	LOC106574784	protein asteroid homolog 1-like	protein_coding	ssa02	6265951	6269953	+	ASTE1
gene34305:106573163	1.52633	0.607285	17.2947	5.46243e-05	0.000455105	XP_014003348.1	LOC106573163	AMP deaminase 3-like	protein_coding	ssa16	9195334	9196900	+
gene34312:106573260	-1.06626	0.932488	16.1012	9.59825e-05	0.000730323	XP_014003643.1	LOC106573260	protein LSM14 homolog A-like	protein_coding	ssa16	9353480	9388269	+	LSM14A
gene34352:106573205	1.25477	2.3882	29.4432	2.36588e-07	4.58732e-06	XP_014003488.1	LOC106573205	protein-methionine sulfoxide oxidase mical2b-like	protein_coding	ssa16	11814041	11888822	+
gene3438:106574865	-1.43648	1.38698	58.8445	2.3051e-12	2.17095e-10	XP_014006461.1	LOC106574865	INO80 complex subunit C-like	protein_coding	ssa02	6541819	6544845	-	INO80C
gene34384:106573190	1.66291	2.17782	17.368	5.29075e-05	0.000442865	XP_014003441.1	LOC106573190	cat eye syndrome critical region protein 2-like	protein_coding	ssa16	13117443	13182473	-	CECR2
gene3439:106574869	-1.48656	1.68535	39.801	3.22985e-09	1.15065e-07	XP_014006475.1	LOC106574869	T-cell activation inhibitor%2C mitochondrial-like	protein_coding	ssa02	6562111	6564750	-
gene34413:106573165	1.36385	2.82809	40.1025	2.86202e-09	1.03703e-07	XP_014003354.1	LOC106573165	teashirt homolog 3-like	protein_coding	ssa16	15382692	15406215	-	TSHZ3
gene34417:106573284	2.10502	0.27493	24.3088	2.22204e-06	3.03706e-05	XP_014003671.1	LOC106573284	MTSS1-like protein	protein_coding	ssa16	15596582	15632394	-	MTSS1L
gene3448:106574976	1.96567	0.00763676	11.5081	0.000893994	0.00469047	XP_014006588.1	LOC106574976	bone morphogenetic protein receptor type-2-like	protein_coding	ssa02	6703731	6715198	-
gene34499:106573359	1.03596	5.43656	78.6386	2.54709e-15	6.0473e-13	XP_014003816.1	LOC106573359	ras association domain-containing protein 8-like	protein_coding	ssa16	21229970	21286273	-
gene34511:106573371	1.04881	4.17987	49.0376	8.74127e-11	5.13451e-09	XP_014003847.1	LOC106573371	round spermatid basic protein 1-like	protein_coding	ssa16	21664806	21683015	-	RSBN1L
gene34520:100196193	1.79791	-0.178803	16.7591	7.02957e-05	0.000564744	NP_001134694.1	htf4	Transcription factor 12	protein_coding	ssa16	21847942	21848326	-
gene34525:106573384	1.06446	0.459029	13.9004	0.000275957	0.00177041	XP_014003871.1	LOC106573384	hypoxanthine-guanine phosphoribosyltransferase-like	protein_coding	ssa16	22009558	22019900	+	HPRT1
gene34579:106573447	1.04992	3.11749	12.3319	0.00059501	0.00334401	XP_014003974.1	LOC106573447	hepatocyte growth factor-like	protein_coding	ssa16	24363652	24400868	-	HGF
gene34580:106573448	1.7687	-0.491946	13.4207	0.000348456	0.00214048	XP_014003975.1	LOC106573448	voltage-dependent calcium channel subunit alpha-2/delta-1-like	protein_coding	ssa16	24431299	24591482	-	CACNA2D1
gene34595:106573459	1.14452	3.67801	20.9609	1.0045e-05	0.000109517	XP_014003998.1	LOC106573459	FERM domain-containing protein 4A-like	protein_coding	ssa16	25427405	25675158	+	FRMD4A
gene3464:106575092	1.77536	-0.0645204	19.8309	1.68074e-05	0.000169176	XP_014006758.1	LOC106575092	lens epithelial cell protein LEP503-like	protein_coding	ssa02	7143190	7144975	-	LENEP
gene34656:106573492	1.4238	0.453573	15.7948	0.000111036	0.000825619	XP_014004058.1	LOC106573492	uncharacterized LOC106573492	protein_coding	ssa16	26758246	26776706	+	ALPK3
gene34732:106573807	1.78325	-0.625927	13.8162	0.000287474	0.00183425	XP_014004630.1	LOC106573807	fMet-Leu-Phe receptor-like	protein_coding	ssa16	30877767	30879854	-
gene34733:106573732	-1.6633	2.86599	22.5773	4.84308e-06	5.90404e-05	XP_014004526.1	nudt21	nudix (nucleoside diphosphate linked moiety X)-type motif 21	protein_coding	ssa16	30896941	30902513	-	NUDT21
gene34777:106573698	-1.25361	2.04055	45.4324	3.4961e-10	1.68363e-08					ssa16	33545993	33547581	+
gene34860:106573614	1.45009	0.460449	10.5481	0.00144591	0.00695723					ssa16	36873215	36875979	+
gene34874:106573599	-1.27915	1.49215	18.8685	2.62091e-05	0.000245741	XP_014004254.1	LOC106573599	duodenase-1-like	protein_coding	ssa16	37932218	37954035	-	GZMB
gene34887:106573587	1.57623	-0.104088	11.6646	0.000827009	0.00439953	XP_014004228.1	mef2b	myocyte enhancer factor 2B	protein_coding	ssa16	38304017	38330122	-	MEF2B
gene34890:100195944	-1.02814	4.02974	51.4019	3.57493e-11	2.39393e-09	NP_001134445.1	rfxank	regulatory factor X-associated ankyrin-containing protein	protein_coding	ssa16	38347885	38350459	+	RFXANK
gene34895:106573581	1.38943	4.22633	19.5534	1.92465e-05	0.000190284	XP_014004215.1	LOC106573581	protein strawberry notch homolog 2-like	protein_coding	ssa16	38751436	38851686	+	SBNO2
gene34930:106573544	1.4329	2.40408	35.2422	2.06529e-08	5.75215e-07	XP_014004150.1	LOC106573544	lipoprotein lipase-like	protein_coding	ssa16	39762081	39773994	+
gene34963:106573838	-2.09919	0.366381	35.0961	2.19368e-08	6.06001e-07	XP_014004710.1	LOC106573838	zinc finger protein 883-like	protein_coding	ssa16	41032838	41049701	+	ZNF544
gene35000:106573974	-1.08581	0.142271	11.5973	0.000855156	0.00452586					ssa16	41977787	41981174	+
gene35036:106573895	-1.16803	2.23245	27.9579	4.48562e-07	7.85007e-06	XP_014004802.1	LOC106573895	CREB-regulated transcription coactivator 1-like	protein_coding	ssa16	42939262	42983282	-	CRTC1
gene35037:106573902	-1.77173	0.925313	24.7605	1.81864e-06	2.5673e-05	XP_014004824.1	LOC106573902	kelch-like protein 26	protein_coding	ssa16	42985694	42992733	-	KLHL26
gene3505:106575489	1.05924	1.10197	10.0282	0.00188061	0.00862934	XP_014007482.1	LOC106575489	tuftelin-like	protein_coding	ssa02	8192992	8210462	-	TUFT1
gene3506:106575505	1.64897	1.7737	19.4483	2.00612e-05	0.00019702	XP_014007504.1	LOC106575505	cingulin-like	protein_coding	ssa02	8230412	8257496	-	CGN
gene35081:106573936	-3.42873	-0.0893837	43.6422	7.03265e-10	3.10085e-08	XP_014004877.1	LOC106573936	multidrug and toxin extrusion protein 1-like	protein_coding	ssa16	44664805	44680796	+	SLC47A1
gene35113:106573992	1.4963	1.16775	13.511	0.000333457	0.00206478	XP_014004951.1	LOC106573992	cyclin-dependent kinase-like 5	protein_coding	ssa16	45726526	45812926	+	CDKL5
gene35139:106574049	-1.1935	5.77294	53.9818	1.37314e-11	1.04061e-09	XP_014005049.1	LOC106574049	sterile alpha motif domain-containing protein 9-like	protein_coding	ssa16	46842684	46854062	-	SAMD9
gene35149:106574039	1.35512	3.40861	15.775	0.000112569	0.000835122	XP_014005029.1	LOC106574039	T-cell acute lymphocytic leukemia protein 1 homolog	protein_coding	ssa16	47543354	47548641	-	TAL1
gene35151:106574083	1.62449	1.23456	12.2402	0.000622477	0.00347365	XP_014005099.1	LOC106574083	chemokine XC receptor 1-like	protein_coding	ssa16	47572976	47574587	-	XCR1
gene3517:106575617	1.69212	5.88807	30.5079	1.53465e-07	3.15584e-06	XP_014007707.1	LOC106575617	uncharacterized LOC106575617	protein_coding	ssa02	8520170	8522344	+
gene35221:106574114	1.60674	0.110967	10.9799	0.00116393	0.00582841	XP_014005196.1	LOC106574114	protein XRP2-like	protein_coding	ssa16	50633465	50661583	-
gene35242:106574143	1.01209	3.11956	13.3391	0.000362922	0.00221731	XP_014005251.1	LOC106574143	guanine nucleotide-binding protein subunit beta-4	protein_coding	ssa16	52464677	52502262	-
gene35261:100846967	1.44821	2.34564	16.6143	7.53364e-05	0.000597186	NP_001239291.1	at1b1	Sodium/potassium-transporting ATPase subunit beta-1	protein_coding	ssa16	53346648	53347224	+	ATP1B1
gene35307:100195568	1.45157	5.28045	18.1798	3.64425e-05	0.000325081	NP_001134069.1	at233	Sodium/potassium-transporting ATPase subunit beta-233	protein_coding	ssa16	56774450	56788681	+	ATP1B1
gene35320:100286434	-1.36179	3.71332	82.2254	7.93445e-16	2.20151e-13	NP_001139845.1	sft2b	Vesicle transport protein SFT2B	protein_coding	ssa16	57309925	57392477	-	SFT2D2
gene3539:106575861	2.06431	2.99813	23.6424	3.0206e-06	3.95802e-05	XP_014008040.1	LOC106575861	kell blood group glycoprotein-like	protein_coding	ssa02	8909276	8915313	+
gene35398:100195447	-1.31242	3.30356	109.676	1.88645e-19	1.08554e-16	NP_001133948.1	pknx1	Homeobox protein PKNOX1	protein_coding	ssa16	62309290	62321757	-
gene35434:106574281	1.98122	1.2582	23.8821	2.68765e-06	3.59246e-05	XP_014005551.1	LOC106574281	1-phosphatidylinositol 4%2C5-bisphosphate phosphodiesterase delta-4-like	protein_coding	ssa16	64475972	64500389	+
gene35450:106574372	-1.12022	2.15495	33.0098	5.22366e-08	1.25958e-06	XP_014005703.1	pnpla4	patatin-like phospholipase domain containing 4	protein_coding	ssa16	65252495	65255267	+	PNPLA4
gene35453:106574371	1.54932	4.90058	18.9379	2.56315e-05	0.000241391	XP_014005702.1	LOC106574371	phospholipase A2 inhibitor 31 kDa subunit-like	protein_coding	ssa16	65332456	65333715	-
gene35507:106574440	-1.19938	2.08203	48.4002	1.11463e-10	6.255e-09	XP_014005813.1	LOC106574440	oocyte zinc finger protein XlCOF8.4-like	protein_coding	ssa16	67598971	67604809	+
gene35509:106574439	-2.28127	0.910361	61.8573	7.82998e-13	8.49315e-11	XP_014005812.1	LOC106574439	zinc finger protein OZF-like	protein_coding	ssa16	67618767	67628498	+
gene35559:106574465	1.06071	0.971624	9.83305	0.00207662	0.0093382	XP_014005836.1	LOC106574465	growth hormone-regulated TBC protein 1-A-like	protein_coding	ssa16	70424480	70430469	+
gene3556:106576055	1.81293	2.54465	44.8049	4.46298e-10	2.09575e-08	XP_014008378.1	LOC106576055	RUN domain-containing protein 3B-like	protein_coding	ssa02	9169732	9183450	-	RUNDC3B
gene35566:106574559	1.66607	2.75083	23.2618	3.55997e-06	4.5472e-05	XP_014006005.1	LOC106574559	xin actin-binding repeat-containing protein 2-like	protein_coding	ssa16	70702660	70747726	+
gene35635:106574506	1.01359	3.99545	29.0432	2.80891e-07	5.30988e-06	XP_014005899.1	LOC106574506	kelch-like ECH-associated protein 1	protein_coding	ssa16	72210232	72227384	-
gene35638:106574504	1.14709	1.85315	25.283	1.44365e-06	2.10992e-05	XP_014005895.1	LOC106574504	cytokine receptor-like factor 1	protein_coding	ssa16	72237885	72243780	+	CRLF1
gene35652:106574488	-1.15785	0.2629	12.0701	0.000676391	0.0037201	XP_014005871.1	LOC106574488	UPF0392 protein F13G3.3-like	protein_coding	ssa16	72493921	72500383	-
gene35654:106574586	-1.08852	0.759081	13.082	0.000411148	0.00246319	XP_014006037.1	LOC106574586	nardilysin-like	protein_coding	ssa16	72562531	72565667	+	NRD1
gene35687:106574598	1.62352	1.15904	11.8972	0.00073739	0.00398712	XP_014006049.1	LOC106574598	neurobeachin-like protein 1	protein_coding	ssa16	73192874	73205717	-	NBEAL1
gene35719:106574630	-1.65644	0.569554	33.9589	3.51504e-08	8.99314e-07					ssa16	74191416	74192715	-
gene35726:106574635	1.15146	5.17898	21.6395	7.41914e-06	8.458e-05	XP_014006104.1	LOC106574635	uncharacterized LOC106574635	protein_coding	ssa16	74468215	74478074	+
gene35799:106574711	-1.26448	1.09267	9.74292	0.00217411	0.00968422	XP_014006200.1	LOC106574711	traf2 and NCK-interacting protein kinase-like	protein_coding	ssa16	76162157	76164608	-	TNIK
gene35850:106574774	-1.3462	0.135847	14.4414	0.000212412	0.00142157	XP_014006300.1	LOC106574774	uncharacterized LOC106574774	protein_coding	ssa16	77529645	77531647	-
gene35860:106574781	-1.83288	0.293261	31.148	1.14421e-07	2.44629e-06					ssa16	77975442	77982718	+
gene3590:106576393	1.11754	2.7924	11.6131	0.000849332	0.00449925	XP_014009010.1	LOC106576393	ETS domain-containing transcription factor ERF-like	protein_coding	ssa02	9743625	9765530	-
gene35912:106574832	1.0204	1.49813	11.3051	0.000989187	0.0050931	XP_014006402.1	LOC106574832	R3H domain-containing protein 1-like	protein_coding	ssa16	79037546	79183081	-	R3HDM1
gene35932:106574855	1.19967	1.47506	12.3349	0.00059344	0.00333685	XP_014006448.1	LOC106574855	R3H domain-containing protein 1-like	protein_coding	ssa16	79567866	79605512	+	R3HDM1
gene35975:106574900	1.16318	3.53469	11.9591	0.000716645	0.00389729	XP_014006506.1	LOC106574900	immunoglobulin-like domain-containing receptor 1	protein_coding	ssa16	80570348	80582064	+	ILDR1
gene3599:106576519	-1.14449	2.45481	46.3449	2.45506e-10	1.2422e-08	XP_014009213.1	LOC106576519	zinc finger protein 569-like	protein_coding	ssa02	9970691	9972724	+
gene36015:106574939	1.68212	0.740976	21.303	8.57547e-06	9.58347e-05	XP_014006549.1	LOC106574939	E3 ubiquitin-protein ligase HECW2-like	protein_coding	ssa16	82071857	82083334	+	HECW2
gene36038:106574965	-1.15874	0.499141	12.9895	0.000430188	0.00255472	XP_014006575.1	LOC106574965	DDB1- and CUL4-associated factor 6-like	protein_coding	ssa16	83324646	83329182	-	DCAF6
gene36094:106575025	1.20303	3.52355	16.2883	8.81131e-05	0.000679121	XP_014006634.1	tpp2	tripeptidyl peptidase II	protein_coding	ssa16	86760968	86801992	-	TPP2
gene36132:106575059	1.12451	2.1041	10.3835	0.00157156	0.00744676	XP_014006671.1	LOC106575059	FERM%2C RhoGEF and pleckstrin domain-containing protein 1-like	protein_coding	ssa16	87713334	87759483	+
gene36135:106575061	-1.2081	1.63903	10.148	0.00177021	0.00821153	XP_014006674.1	LOC106575061	microsomal glutathione S-transferase 1-like	protein_coding	ssa17	142287	152556	+	MGST1
gene36143:106575067	-1.19751	3.60534	50.8077	4.47086e-11	2.90786e-09	XP_014006689.1	LOC106575067	nuclear factor erythroid 2-related factor 2-like	protein_coding	ssa17	472902	523233	+
gene36213:106575085	-1.74932	2.71329	91.8712	3.77782e-17	1.39414e-14	XP_014006737.1	LOC106575085	homeobox protein PKNOX1-like	protein_coding	ssa17	4973094	4981010	-
gene3622:106576644	-1.15535	1.45502	18.9406	2.53488e-05	0.00023906	XP_014009365.1	LOC106576644	intermediate filament family orphan 1-like	protein_coding	ssa02	10301427	10334095	-	IFFO1
gene36277:106575197	-1.12197	1.77717	34.9392	2.34062e-08	6.38285e-07	XP_014007006.1	sts	steroid sulfatase (microsomal)%2C isozyme S	protein_coding	ssa17	8054930	8067229	-
gene36278:106575196	-2.09313	-0.0107786	32.5083	6.44608e-08	1.49488e-06	XP_014007005.1	LOC106575196	anosmin-1-like	protein_coding	ssa17	8103829	8124103	-	ANOS1
gene36296:106575175	4.68429	1.82731	19.0702	2.40954e-05	0.0002296	XP_014006935.1	LOC106575175	MAGUK p55 subfamily member 4-like	protein_coding	ssa17	8515332	8526227	-	MPP4
gene36299:106575174	1.18352	1.3576	16.7047	7.21231e-05	0.000576289	XP_014006931.1	LOC106575174	cyclin-dependent kinase 15	protein_coding	ssa17	8581202	8612368	+	CDK15
gene36317:106575156	-1.26845	-0.385163	10.8307	0.00125434	0.00619886	XP_014006864.1	LOC106575156	uncharacterized protein C7orf57 homolog	protein_coding	ssa17	9041379	9045938	-	C7orf57
gene36321:106575244	-1.00519	1.26648	15.8821	0.000106516	0.000796022	XP_014007108.1	LOC106575244	rab GTPase-activating protein 1-like%2C isoform 10	protein_coding	ssa17	9094313	9101614	+
gene36327:100196633	-1.3943	1.46075	29.4044	2.40556e-07	4.65098e-06	NP_001135134.1	dph3	DPH3 homolog	protein_coding	ssa17	9149708	9150576	+	DPH3
gene36328:106575249	-1.00277	3.42434	61.6511	8.42582e-13	9.05269e-11	XP_014007115.1	LOC106575249	cytoplasmic protein NCK2-like	protein_coding	ssa17	9151998	9209186	+
gene36333:106575254	-1.45356	-0.0136152	12.2433	0.000620873	0.00346699					ssa17	9485601	9490973	+
gene36334:106575255	-1.4503	1.60354	65.2876	2.33619e-13	2.90535e-11	XP_014007123.1	LOC106575255	zinc finger protein 184-like	protein_coding	ssa17	9500886	9537274	+
gene36388:106575303	1.55058	3.12396	28.4437	3.65201e-07	6.59868e-06	XP_014007226.1	LOC106575303	xin actin-binding repeat-containing protein 2-like	protein_coding	ssa17	12412425	12471377	+	XIRP2
gene36401:106575312	1.25997	0.412398	13.264	0.00037615	0.00228415	XP_014007244.1	LOC106575312	zinc finger protein Dzip1-like	protein_coding	ssa17	12784321	12792217	+	DZIP1
gene36430:106575349	-1.27144	2.08427	40.9933	2.00485e-09	7.63937e-08	XP_014007309.1	LOC106575349	zinc finger protein OZF-like	protein_coding	ssa17	13502069	13518981	-	ZNF544
gene36457:106575370	-1.29841	0.154076	13.3688	0.000357399	0.00218789	XP_014007336.1	LOC106575370	oocyte zinc finger protein XlCOF6-like	protein_coding	ssa17	14196829	14216429	+
gene36466:100195755	4.68705	2.35362	67.8102	1.02921e-13	1.42044e-11	NP_001134256.1	c1ql2	complement component 1%2C q subcomponent-like 2	protein_coding	ssa17	14439952	14444396	-
gene36488:106575383	2.01868	-0.0119907	21.0054	9.81897e-06	0.000107467	XP_014007363.1	LOC106575383	serine/threonine-protein phosphatase 2A regulatory subunit B'' subunit alpha-like	protein_coding	ssa17	14841164	14844919	+
gene36489:106575389	-1.71583	2.00234	76.8092	4.65189e-15	9.87102e-13	XP_014007369.1	LOC106575389	zinc finger protein 135-like	protein_coding	ssa17	14902827	14909428	+	ZNF544
gene36496:106575388	-1.21116	0.757309	17.5538	4.83698e-05	0.000411168					ssa17	15168968	15175259	+
gene36505:106575426	1.15093	1.65343	14.5392	0.000202631	0.00136933	XP_014007401.1	LOC106575426	phospholipase D1-like	protein_coding	ssa17	15454869	15461324	-
gene36507:106575424	1.52785	0.116977	9.98949	0.00191794	0.00876321	XP_014007399.1	LOC106575424	fibronectin type III domain-containing protein 3B-like	protein_coding	ssa17	15495624	15505975	-	FNDC3B
gene36522:106575440	2.33464	-0.574678	15.5145	0.000126918	0.000923288	XP_014007412.1	LOC106575440	fibronectin type III domain-containing protein 3B-like	protein_coding	ssa17	15685809	15694442	+	FNDC3B
gene36545:106575453	-1.02797	2.08068	43.9166	6.31525e-10	2.82862e-08	XP_014007429.1	LOC106575453	peptide chain release factor 1%2C mitochondrial-like	protein_coding	ssa17	15959701	15963219	+	MTRF1
gene36566:106575473	-1.916	1.89123	86.9427	1.76107e-16	5.53612e-14					ssa17	16648606	16655187	+
gene3660:106576885	-1.05522	3.49261	38.7298	4.97191e-09	1.67628e-07	XP_014009888.1	LOC106576885	ubiquitin-like protein ATG12	protein_coding	ssa02	11109391	11112644	+	ATG12
gene36619:106575533	-2.41692	-0.418194	29.7426	2.08124e-07	4.09861e-06	XP_014007564.1	LOC106575533	zinc finger and SCAN domain-containing protein 12-like	protein_coding	ssa17	17971823	17977127	+
gene36633:106575559	-1.27287	1.45787	29.6951	2.12399e-07	4.17072e-06	XP_014007612.1	LOC106575559	integral membrane protein GPR180-like	protein_coding	ssa17	18286483	18293225	+	GPR180
gene36637:106575560	-1.97255	-0.276776	13.7107	0.000302593	0.00191061	XP_014007613.1	LOC106575560	uncharacterized LOC106575560	protein_coding	ssa17	18364890	18365998	+	SPANXN2
gene36639:106575550	1.36395	3.84191	15.3645	0.000137069	0.000984059	XP_014007591.1	LOC106575550	ATP-dependent RNA helicase DDX3X-like	protein_coding	ssa17	18477867	18492152	-	DDX3X
gene36664:106575593	-1.2288	0.67379	16.0686	9.74819e-05	0.000739412					ssa17	19224890	19228749	+
gene36671:106575582	-1.42315	2.37929	66.7481	1.40473e-13	1.87764e-11	XP_014007652.1	LOC106575582	zinc finger and SCAN domain-containing protein 31-like	protein_coding	ssa17	19288764	19291833	-
gene36700:106575618	1.47349	2.3119	20.9773	9.95476e-06	0.00010866	XP_014007705.1	LOC106575618	histone deacetylase 4-like	protein_coding	ssa17	20230128	20288862	+
gene36715:106575629	-2.72032	4.4665	23.9009	2.72152e-06	3.63344e-05	XP_014007714.1	LOC106575629	intermediate filament protein ON3-like	protein_coding	ssa17	20562725	20572107	-
gene36716:106575633	-5.47016	0.0352446	37.3789	8.7043e-09	2.73629e-07					ssa17	20572524	20578931	+
gene36719:106575635	2.45079	-1.16368	14.1678	0.000242433	0.00158498	XP_014007719.1	LOC106575635	C-X-C chemokine receptor type 1-like	protein_coding	ssa17	20633214	20642534	+
gene36721:106575639	-3.51469	4.58879	29.3864	2.50806e-07	4.83264e-06	XP_014007725.1	LOC106575639	keratin%2C type I cytoskeletal 18-like	protein_coding	ssa17	20837758	20843942	-
gene36722:106575637	-2.1919	4.06156	30.4554	1.56852e-07	3.20606e-06	XP_014007720.1	LOC106575637	intermediate filament protein ON3-like	protein_coding	ssa17	20844149	20852680	+
gene36729:106575647	1.31957	1.97999	16.6621	7.35908e-05	0.000586224	XP_014007738.1	LOC106575647	filamin A-interacting protein 1-like	protein_coding	ssa17	21014488	21021865	-	FILIP1L
gene36730:106575649	1.36741	0.612131	11.1398	0.00107435	0.00546446	XP_014007740.1	LOC106575649	filamin A-interacting protein 1-like	protein_coding	ssa17	21051625	21089598	+
gene36735:106575653	-1.43578	1.14394	32.9111	5.44389e-08	1.30159e-06	XP_014007745.1	LOC106575653	uncharacterized LOC106575653	protein_coding	ssa17	21480237	21485156	-
gene3675:106577032	1.04673	4.0107	12.3173	0.000600372	0.00336857	XP_014010177.1	LOC106577032	trichohyalin-like	protein_coding	ssa02	11449938	11455777	+
gene36763:100195941	-1.24925	1.36107	31.6678	9.18347e-08	2.01575e-06	NP_001134442.1	nud15	Probable 7%2C8-dihydro-8-oxoguanine triphosphatase NUDT15	protein_coding	ssa17	22449528	22450686	+	NUDT15
gene368:106574998	-1.08745	0.736298	17.6853	4.54801e-05	0.000390218	XP_014006629.1	LOC106574998	galectin-8-like	protein_coding	ssa01	18532181	18537392	+	LGALS8
gene36809:106575712	1.1449	4.25815	31.6996	9.0855e-08	1.99781e-06	XP_014007838.1	LOC106575712	calcitonin gene-related peptide type 1 receptor-like	protein_coding	ssa17	23824708	23829220	+
gene36810:106575713	1.23139	0.336983	9.91249	0.00199443	0.00903925	XP_014007839.1	LOC106575713	calcitonin gene-related peptide type 1 receptor-like	protein_coding	ssa17	23840494	23849125	-
gene36944:106575851	1.04678	1.20909	12.4457	0.000561892	0.00318903	XP_014008028.1	LOC106575851	Nance-Horan syndrome protein-like	protein_coding	ssa17	27876531	27886566	+	NHS
gene3703:106577375	-1.31527	0.231357	16.7986	6.89953e-05	0.000555348	XP_014010819.1	LOC106577375	B-cell antigen receptor complex-associated protein alpha chain-like	protein_coding	ssa02	12003768	12007294	+	CD79A
gene37043:106575958	-1.28021	1.79325	26.7517	7.57801e-07	1.22457e-05	XP_014008203.1	LOC106575958	zinc finger protein 2 homolog	protein_coding	ssa17	30794525	30805790	-	ZNF544
gene37081:106575994	-1.03737	0.0912308	10.0116	0.00189654	0.00869069	XP_014008260.1	LOC106575994	protein FAM19A5-like	protein_coding	ssa17	32717263	32885326	-
gene37089:106575988	-1.0694	4.1295	83.9654	4.53701e-16	1.3279e-13	XP_014008246.1	LOC106575988	putative Dol-P-Glc:Glc(2)Man(9)GlcNAc(2)-PP-Dol alpha-1%2C2-glucosyltransferase	protein_coding	ssa17	33708307	33711740	+	ALG10
gene37138:106576039	-1.44205	0.614438	21.8107	6.8116e-06	7.87405e-05	XP_014008337.1	LOC106576039	SLIT-ROBO Rho GTPase-activating protein 1-like	protein_coding	ssa17	35095934	35120392	-	SRGAP1
gene37165:106576058	1.71438	1.87667	41.245	1.81357e-09	7.01443e-08	XP_014008379.1	strip2	striatin interacting protein 2	protein_coding	ssa17	36471048	36508785	-	STRIP1
gene37184:100194690	-1.32451	0.0546672	9.86691	0.00204117	0.0092154	XP_014008427.1	cssa17h12orf56	chromosome ssa17 open reading frame%2C human C12orf56	protein_coding	ssa17	37427719	37450392	-	C12orf56
gene37205:106576108	-1.02739	0.67968	10.8724	0.00122839	0.00609544	XP_014008468.1	LOC106576108	prosaposin receptor GPR37-like	protein_coding	ssa17	38406775	38416143	+	GPR37
gene37209:106576111	1.51275	0.22299	15.1632	0.000150136	0.00106083	XP_014008477.1	LOC106576111	leiomodin-2-like	protein_coding	ssa17	38521344	38525725	-	LMOD2
gene37273:106576177	-1.1007	2.96434	17.897	4.11924e-05	0.000359241	XP_014008624.1	LOC106576177	suppressor of cytokine signaling 2-like	protein_coding	ssa17	41401457	41407649	+
gene37296:106576192	1.14333	0.677672	10.5191	0.00146724	0.00703888	XP_014008656.1	LOC106576192	6-phosphofructo-2-kinase/fructose-2%2C6-bisphosphatase 3-like	protein_coding	ssa17	41821898	41831482	+	PFKFB3
gene37348:106576243	-1.33931	0.900747	26.0855	1.01428e-06	1.57241e-05	XP_014008784.1	LOC106576243	mitogen-activated protein kinase 12-like	protein_coding	ssa17	43875324	43880810	+	MAPK12
gene37389:106576285	-1.22872	0.166271	13.6504	0.00031159	0.00195325	XP_014008851.1	LOC106576285	achaete-scute homolog 1a	protein_coding	ssa17	44812100	44813939	-	ASCL1
gene37392:106576287	-1.56733	2.36536	15.1419	0.00015206	0.00107219					ssa17	44850888	44853687	+
gene37399:106576334	-1.14356	2.73612	45.7005	3.15062e-10	1.53688e-08	XP_014008937.1	LOC106576334	netrin-4-like	protein_coding	ssa17	44916767	44947665	+	NTN4
gene37409:106576302	-1.11812	2.08473	24.5493	1.99703e-06	2.78076e-05	XP_014008874.1	LOC106576302	uncharacterized LOC106576302	protein_coding	ssa17	45166474	45177128	+
gene37423:106576311	-1.50149	1.0003	26.9876	6.83692e-07	1.12516e-05					ssa17	45310266	45312681	+
gene37459:106576365	1.24305	2.60868	19.9231	1.61103e-05	0.000163077	XP_014008964.1	LOC106576365	proline-rich protein 5-like	protein_coding	ssa17	46884071	46928223	+	PRR5
gene37460:106576366	1.36308	1.06525	19.3036	2.14304e-05	0.000207821					ssa17	46900034	46900904	+
gene37490:100306766	1.80754	6.62284	143.116	2.32124e-23	3.0311e-20	NP_001158777.1	s38a2	Sodium-coupled neutral amino acid transporter 2	protein_coding	ssa17	47898380	47909509	-	SLC38A2
gene37492:106576408	1.69081	6.02238	125.041	2.62398e-21	2.34439e-18	XP_014009036.1	LOC106576408	sodium-coupled neutral amino acid transporter 4-like	protein_coding	ssa17	47949820	47984107	-
gene37517:106576386	-1.07892	1.70585	16.5262	7.84715e-05	0.00061814					ssa17	48474534	48479446	+
gene37579:106576484	1.43042	1.06243	19.5136	1.94513e-05	0.000191974	XP_014009163.1	LOC106576484	semaphorin-3aa-like	protein_coding	ssa17	50528806	50535772	+	SEMA3A
gene37586:106576490	1.21585	0.207272	11.3581	0.000963373	0.00498666	XP_014009169.1	LOC106576490	receptor-type tyrosine-protein phosphatase beta-like	protein_coding	ssa17	50876497	50885753	+
gene37591:106576496	1.17065	1.69861	14.27	0.000230741	0.00151733	XP_014009182.1	LOC106576496	proline-rich transmembrane protein 4-like	protein_coding	ssa17	51069656	51099590	+	PRRT4
gene37615:106576520	-1.14262	1.34843	30.051	1.82434e-07	3.64557e-06	XP_014009210.1	LOC106576520	gastrula zinc finger protein XlCGF57.1-like	protein_coding	ssa17	51761974	51767292	+
gene37618:106576524	2.08791	-0.157497	15.5149	0.000126894	0.000923288	XP_014009220.1	LOC106576524	prickle-like protein 1	protein_coding	ssa17	51851453	51867516	+
gene37657:106576565	1.2079	1.88154	12.5912	0.000523058	0.00300647	XP_014009264.1	LOC106576565	tumor protein 63-like	protein_coding	ssa17	53466549	53488239	+	TP63
gene37666:106576577	1.65375	2.25815	12.8512	0.000461554	0.00270971	XP_014009279.1	herc1	HECT and RLD domain containing E3 ubiquitin protein ligase family member 1	protein_coding	ssa17	54045819	54258674	-	HERC1
gene37698:106576605	-1.34107	2.16889	13.399	0.00035251	0.00215991	XP_014009324.1	LOC106576605	fish-egg lectin-like	protein_coding	ssa17	55333289	55335655	-
gene37706:106576617	1.57619	0.344668	13.6349	0.000313944	0.00196394	XP_014009332.1	LOC106576617	receptor-type tyrosine-protein phosphatase beta-like	protein_coding	ssa17	55565133	55573030	+
gene3772:106577891	1.28663	2.58986	21.5724	7.58823e-06	8.62498e-05	XP_014011799.1	LOC106577891	zinc finger and BTB domain-containing protein 16-A-like	protein_coding	ssa02	13457165	13468540	-
gene37722:106576635	1.10101	2.83205	23.5642	3.096e-06	4.03967e-05					ssa17	56354270	56355239	-
gene37822:106576866	-1.61028	-0.630551	15.1237	0.000153006	0.00107796					ssa18	4020463	4040136	-
gene37841:106576847	1.22054	0.925534	12.148	0.000650821	0.00360516	XP_014009797.1	LOC106576847	growth/differentiation factor 10-like	protein_coding	ssa18	4829760	4840638	-	GDF10
gene37861:100286445	3.11606	0.69284	52.7153	2.18635e-11	1.57598e-09	XP_014009409.1	bag3	BCL2-associated athanogene 3	protein_coding	ssa18	6061857	6068368	+	BAG3
gene37875:106576816	-1.06671	3.7177	51.714	3.17964e-11	2.17645e-09	XP_014009730.1	LOC106576816	protein FAM204A-like	protein_coding	ssa18	6460815	6505496	+	FAM204A
gene37888:106576806	-1.23205	0.50696	21.6473	7.33465e-06	8.38447e-05					ssa18	7048327	7051443	-
gene37891:106576803	2.09382	6.63594	127.942	1.2574e-21	1.24744e-18	XP_014009708.1	LOC106576803	cytochrome P450 1B1-like	protein_coding	ssa18	7182135	7189965	+	CYP1B1
gene38006:106576704	1.05486	3.53497	21.1556	9.17802e-06	0.000101599	XP_014009497.1	LOC106576704	inactive ubiquitin carboxyl-terminal hydrolase 54-like	protein_coding	ssa18	12663592	12769705	-
gene38061:106576952	1.26538	1.82607	25.4642	1.33279e-06	1.97596e-05	XP_014009998.1	LOC106576952	ras guanyl-releasing protein 3-like	protein_coding	ssa18	14696289	14748053	+
gene38065:106576957	-1.06289	4.08837	40.456	2.48439e-09	9.18819e-08	XP_014010005.1	LOC106576957	sphingolipid delta(4)-desaturase DES1-like	protein_coding	ssa18	14804056	14820127	-	DEGS1
gene38124:106577006	1.09271	3.23144	13.3075	0.000368839	0.002249	XP_014010114.1	LOC106577006	phosphatidylcholine:ceramide cholinephosphotransferase 1-like	protein_coding	ssa18	18254982	18297785	-
gene38169:106577044	-1.09191	3.24463	26.6387	7.96133e-07	1.27558e-05	XP_014010204.1	LOC106577044	homeobox protein HMX3-like	protein_coding	ssa18	20494151	20496919	-	HMX3
gene38179:106577055	-1.09139	1.9931	17.9985	3.92859e-05	0.000345722	XP_014010233.1	LOC106577055	SPARC-like	protein_coding	ssa18	21393600	21428213	+
gene38200:106577148	-2.41937	3.1399	92.2916	3.31805e-17	1.26574e-14	XP_014010416.1	LOC106577148	monocarboxylate transporter 9-like	protein_coding	ssa18	22118829	22127915	-
gene38246:106577107	-1.11905	3.02148	63.8778	3.83076e-13	4.53164e-11					ssa18	24980856	25044833	-
gene38261:106577160	1.51863	2.21739	16.7552	7.0517e-05	0.000566169	XP_014010446.1	LOC106577160	sodium/calcium exchanger 1-like	protein_coding	ssa18	25672657	25864880	-	SLC8A1
gene38292:106577211	1.06044	2.15301	18.6732	2.86954e-05	0.000265357	XP_014010591.1	LOC106577211	DNA damage-inducible transcript 4 protein-like	protein_coding	ssa18	27461946	27463809	+
gene38345:106577242	1.11127	2.62472	21.8552	6.67556e-06	7.76063e-05	XP_014010642.1	LOC106577242	leucine zipper putative tumor suppressor 2 homolog	protein_coding	ssa18	30314966	30411506	-	LZTS2
gene38390:106577293	-1.31337	-0.132437	13.1325	0.000401116	0.0024116	XP_014010704.1	LOC106577293	involucrin-like	protein_coding	ssa18	32444762	32448974	+
gene38422:106577323	1.24285	3.48944	23.1392	3.7557e-06	4.75606e-05	XP_014010759.1	LOC106577323	N-acetyllactosaminide beta-1%2C3-N-acetylglucosaminyltransferase 2-like	protein_coding	ssa18	34321692	34325497	-
gene38429:106577330	1.12468	1.87559	11.8296	0.000761973	0.00410308	XP_014010768.1	LOC106577330	poly(A) polymerase gamma-like	protein_coding	ssa18	34565398	34576567	-	PAPOLG
gene38432:106577333	-1.89088	1.75926	53.4211	1.68106e-11	1.24842e-09	XP_014010772.1	LOC106577333	another transcription unit protein-like	protein_coding	ssa18	34638737	34641630	+
gene3845:106578696	-1.25548	1.18008	9.76596	0.00214885	0.00959438	XP_014013281.1	LOC106578696	carcinoembryonic antigen-related cell adhesion molecule 20-like	protein_coding	ssa02	15462561	15466499	+
gene38487:106577392	1.06641	3.51223	16.7763	6.98511e-05	0.000561571	XP_014010834.1	LOC106577392	ornithine aminotransferase%2C mitochondrial-like	protein_coding	ssa18	37197892	37214551	+
gene38491:106577395	3.22401	4.45716	90.1366	7.1403e-17	2.42394e-14	XP_014010841.1	LOC106577395	DNA damage-inducible transcript 4 protein-like	protein_coding	ssa18	37356890	37358657	-	DDIT4
gene38502:106577408	-1.01755	1.98104	18.1623	3.63949e-05	0.000324828					ssa18	37598164	37599231	-
gene38528:106577432	-1.14791	2.62936	46.7745	2.0799e-10	1.07644e-08	XP_014010877.1	LOC106577432	L-seryl-tRNA(Sec) kinase-like	protein_coding	ssa18	38453369	38459156	+	PSTK
gene3853:106578743	-1.55776	3.12254	60.6916	1.1867e-12	1.2209e-10	XP_014013356.1	LOC106578743	uncharacterized LOC106578743	protein_coding	ssa02	15571557	15574901	+
gene38549:106577451	-1.71914	1.16104	48.8062	9.54663e-11	5.5122e-09	XP_014010912.1	LOC106577451	uncharacterized LOC106577451	protein_coding	ssa18	39614937	39617472	+
gene38615:106577519	1.01283	4.50059	12.0353	0.000690339	0.0037748	XP_014011090.1	LOC106577519	ras-related protein Rab-1B	protein_coding	ssa18	45875972	45884749	-	RAB1A
gene38627:106577529	1.01242	4.88162	65.3192	2.31051e-13	2.88822e-11	XP_014011107.1	LOC106577529	mitogen-activated protein kinase kinase kinase kinase 2-like	protein_coding	ssa18	46156943	46174172	+	MAP4K2
gene38646:106577548	-1.03493	1.10686	18.7625	2.75301e-05	0.000256427	XP_014011140.1	LOC106577548	uncharacterized LOC106577548	protein_coding	ssa18	47761463	47768714	-
gene38648:106577551	1.09265	5.07075	27.95	4.53037e-07	7.90801e-06	XP_014011150.1	LOC106577551	zinc finger and BTB domain-containing protein 38-like	protein_coding	ssa18	47794986	47822800	-
gene3867:106579058	2.19209	-0.277946	25.3516	1.40062e-06	2.05944e-05	XP_014013987.1	LOC106579058	zinc finger protein ZFPM2-like	protein_coding	ssa02	15968457	16120518	+	ZFPM2
gene38685:106577577	-1.37939	1.70289	39.8532	3.16284e-09	1.13033e-07	XP_014011215.1	LOC106577577	la-related protein 7-like	protein_coding	ssa18	48647710	48653987	+
gene38727:106577610	3.27422	4.57474	194.769	1.5312e-28	6.49821e-25	XP_014011292.1	LOC106577610	peroxisome proliferator-activated receptor gamma coactivator 1-alpha-like	protein_coding	ssa18	49962438	50336894	+	PPARGC1A
gene38743:106577623	1.69264	4.38459	58.4915	2.66171e-12	2.44237e-10	XP_014011318.1	LOC106577623	receptor-type tyrosine-protein phosphatase delta-like	protein_coding	ssa18	51543055	52178975	-
gene38828:106577751	-1.10924	1.29065	16.722	7.1537e-05	0.000572549	XP_014011544.1	LOC106577751	uncharacterized LOC106577751	protein_coding	ssa18	54910806	54915978	+
gene38845:106577697	-1.22185	2.60668	15.49	0.000128503	0.000932422	XP_014011503.1	LOC106577697	transmembrane protein 256-like	protein_coding	ssa18	55415738	55434035	-	TMEM256
gene38871:106577779	1.06412	3.18249	21.6743	7.24543e-06	8.30204e-05					ssa18	56595360	56604435	+
gene3889:106579025	-1.59141	2.32042	55.6751	7.31075e-12	5.95221e-10	XP_014013909.1	LOC106579025	G-protein coupled receptor family C group 6 member A-like	protein_coding	ssa02	16964688	16968754	-	GPRC6A
gene38905:106577803	1.33312	4.42538	36.0341	1.50193e-08	4.37326e-07	XP_014011634.1	LOC106577803	large neutral amino acids transporter small subunit 2-like	protein_coding	ssa18	57180393	57203110	-	SLC7A8
gene38949:106577833	-3.37509	0.94398	17.6945	4.56261e-05	0.000391175	XP_014011670.1	LOC106577833	interleukin-8-like	protein_coding	ssa18	58439621	58445037	+	CXCL9
gene38950:106577834	-1.09745	1.46099	14.4629	0.000210224	0.00141054	XP_014011672.1	LOC106577834	growth-regulated alpha protein-like	protein_coding	ssa18	58453273	58456911	+	CXCL9
gene38971:106577860	-1.22048	4.06937	64.4877	3.09153e-13	3.7486e-11	XP_014011741.1	LOC106577860	actin-related protein 2-like	protein_coding	ssa18	59066642	59074440	+	ACTR2
gene39006:106577893	1.17473	0.660925	13.096	0.00040833	0.00244803	XP_014011800.1	LOC106577893	histidine N-acetyltransferase-like	protein_coding	ssa18	60517985	60549511	+	NAT16
gene3903:106579350	1.52077	2.73009	57.0586	4.40671e-12	3.75975e-10	XP_014014671.1	LOC106579350	Wilms tumor protein 1-interacting protein-like	protein_coding	ssa02	17219381	17254122	+	LIMD1
gene39031:106577912	1.37384	0.81924	22.371	5.28854e-06	6.3567e-05	XP_014011836.1	LOC106577912	tudor domain-containing protein 7B-like	protein_coding	ssa18	61134074	61175904	-	TDRD7
gene39044:106577929	-1.47	-0.570877	15.8477	0.000108276	0.000807755	XP_014011872.1	LOC106577929	C-type mannose receptor 2-like	protein_coding	ssa18	61640062	61651933	-
gene3906:106579373	4.01601	-0.868008	44.4831	5.06009e-10	2.34053e-08	XP_014014699.1	LOC106579373	sodium- and chloride-dependent transporter XTRP3-like	protein_coding	ssa02	17296930	17322992	-
gene39060:106577937	1.01141	4.55676	57.119	4.31085e-12	3.70526e-10	XP_014011885.1	LOC106577937	solute carrier family 12 member 6-like	protein_coding	ssa18	61866631	61891921	+	SLC12A6
gene39071:106577947	-1.37995	5.43231	10.4194	0.00155006	0.00735825	XP_014011901.1	LOC106577947	sterile alpha motif domain-containing protein 9-like	protein_coding	ssa18	62125144	62136314	+
gene39076:106577950	-1.79163	1.26426	33.2681	4.68868e-08	1.15101e-06	XP_014011906.1	LOC106577950	sterile alpha motif domain-containing protein 9-like	protein_coding	ssa18	62362557	62418395	-
gene39086:106577961	-1.59648	-0.72502	9.70323	0.0022185	0.00983421	XP_014011926.1	LOC106577961	probable E3 ubiquitin-protein ligase TRIML1	protein_coding	ssa18	62694038	62818661	+
gene3910:106579385	2.21232	-0.425155	16.3075	8.70318e-05	0.000672314					ssa02	17353350	17360497	+
gene3912:106579390	1.12222	4.24697	54.0489	1.33175e-11	1.01377e-09	XP_014014712.1	LOC106579390	nucleotide-binding oligomerization domain-containing protein 1-like	protein_coding	ssa02	17390324	17398528	+	NOD1
gene39138:106578013	1.13647	1.64211	25.9142	1.09348e-06	1.68214e-05	XP_014012016.1	LOC106578013	leukotriene B4 receptor 1-like	protein_coding	ssa18	64183878	64189271	+	LTB4R
gene39144:106578010	-1.97508	0.309412	37.9888	6.71137e-09	2.1557e-07	XP_014012005.1	LOC106578010	uncharacterized LOC106578010	protein_coding	ssa18	64344557	64352189	+
gene39150:106578042	1.22653	2.32311	10.1919	0.00173268	0.00807718	XP_014012069.1	LOC106578042	protein Shroom2-like	protein_coding	ssa18	64658584	64666749	+
gene39181:106578070	-1.27326	1.42195	23.431	3.28597e-06	4.24352e-05	XP_014012124.1	LOC106578070	zinc finger protein 813-like	protein_coding	ssa18	65916669	65919668	+
gene39204:106578097	1.34602	5.36882	37.1665	9.52108e-09	2.97652e-07	XP_014012163.1	LOC106578097	uncharacterized LOC106578097	protein_coding	ssa18	66488363	66491803	-
gene39212:106578106	1.41016	3.29502	11.8452	0.000758603	0.00409075	XP_014012179.1	LOC106578106	1-phosphatidylinositol 4%2C5-bisphosphate phosphodiesterase beta-3-like	protein_coding	ssa18	66811534	66848571	+	PLCB3
gene3922:106579439	1.80597	0.310594	14.3893	0.000217825	0.00144894	XP_014014822.1	LOC106579439	melanocortin-2 receptor accessory protein 2A-like	protein_coding	ssa02	18524466	18536546	-	MRAP2
gene39227:106578125	-1.66321	-0.176614	17.7717	4.36781e-05	0.000377716	XP_014012215.1	LOC106578125	zinc finger protein 714-like	protein_coding	ssa18	67394612	67399993	+
gene39262:106578158	1.58592	0.256265	10.642	0.00137916	0.00670255	XP_014012263.1	LOC106578158	pumilio homolog 1-like	protein_coding	ssa18	68683859	68686421	-
gene39308:106578207	1.80533	1.2763	11.3506	0.00096845	0.00500463	XP_014012325.1	LOC106578207	endothelin-1 receptor-like	protein_coding	ssa18	69762240	69768910	+
gene39315:106578213	2.83509	3.78348	145.053	1.44968e-23	2.23718e-20	XP_014012332.1	LOC106578213	FH2 domain-containing protein 1-like	protein_coding	ssa18	69991102	69995407	-
gene3932:106579570	1.0419	1.63167	13.0393	0.000419834	0.00250242	XP_014015083.1	LOC106579570	regulating synaptic membrane exocytosis protein 2-like	protein_coding	ssa02	19080772	19297021	+	RIMS2
gene39327:106578226	1.29172	4.57606	31.666	9.27399e-08	2.03136e-06	XP_014012350.1	LOC106578226	phosphatidylcholine:ceramide cholinephosphotransferase 2-like	protein_coding	ssa18	70218949	70235073	+	SGMS2
gene39343:106578242	1.578	1.11096	12.213	0.000630471	0.00350961	XP_014012369.1	LOC106578242	kinesin-like protein KIF1C	protein_coding	ssa18	70624003	70639231	-	KIF1C
gene39357:106578255	-2.83972	4.32662	163.507	1.63677e-25	3.47313e-22	XP_014012389.1	LOC106578255	histone H1.0-B-like	protein_coding	ssa19	656202	657621	-	H1F0
gene39360:106578261	-1.3519	-0.31704	12.9281	0.000443318	0.00261894					ssa19	766177	770969	-
gene39427:100195746	-1.6863	1.86678	40.9971	2.00182e-09	7.63637e-08	NP_001134247.1	cd37	Leukocyte antigen CD37	protein_coding	ssa19	4749506	4769374	-
gene3947:106579633	1.03507	2.63994	12.3968	0.000575809	0.00325496	XP_014015209.1	LOC106579633	nectin-1-like	protein_coding	ssa02	19747150	19758811	+	PVRL2
gene39479:106578384	-1.33089	1.79736	31.5919	9.48263e-08	2.07172e-06	XP_014012606.1	LOC106578384	polycomb complex protein BMI-1-A-like	protein_coding	ssa19	8618712	8626520	+
gene39498:106578407	1.06133	3.22395	35.4396	1.90376e-08	5.36385e-07	XP_014012631.1	tnfrsf11a	tumor necrosis factor receptor superfamily%2C member 11a%2C NFKB activator	protein_coding	ssa19	9442522	9462646	+
gene3950:106579830	1.01954	3.56787	25.2255	1.48072e-06	2.15481e-05	XP_014015537.1	LOC106579830	triple functional domain protein-like	protein_coding	ssa02	19861095	19998678	+	TRIO
gene39504:106578415	-1.17249	2.39592	43.2001	8.36705e-10	3.60038e-08	XP_014012639.1	pex2	peroxisomal biogenesis factor 2	protein_coding	ssa19	9744028	9761905	-	PEX2
gene3951:106579844	-1.0404	1.77522	17.8204	4.26942e-05	0.000370435	XP_014015604.1	LOC106579844	C-C chemokine receptor type 5-like	protein_coding	ssa02	20006174	20010288	-	CCR4
gene3952:106579851	-1.37697	-0.17981	10.0744	0.0018371	0.00846402	XP_014015617.1	LOC106579851	C-C chemokine receptor type 4-like	protein_coding	ssa02	20011643	20015891	-	CCR4
gene39546:106578433	-1.20742	3.41806	56.4217	5.56071e-12	4.66152e-10	XP_014012677.1	timm21	translocase of inner mitochondrial membrane 21 homolog (yeast)	protein_coding	ssa19	11551988	11555314	-	TIMM21
gene39584:106578490	-1.18684	0.139343	9.99113	0.00191635	0.00876134	XP_014012823.1	LOC106578490	uncharacterized protein K02A2.6	protein_coding	ssa19	13963609	13968428	-
gene3962:106579955	1.18638	1.42384	10.2601	0.00167225	0.00784179	XP_014015885.1	LOC106579955	protein piccolo-like	protein_coding	ssa02	20404303	20421038	+
gene39628:106578536	1.37344	2.26959	45.7384	3.10469e-10	1.51665e-08	XP_014012943.1	LOC106578536	frizzled-8-like	protein_coding	ssa19	17129911	17132682	+	FZD8
gene39631:106578540	2.30219	0.389509	25.1725	1.5158e-06	2.19927e-05	XP_014012948.1	LOC106578540	cAMP-responsive element modulator-like	protein_coding	ssa19	17226343	17242038	-
gene39685:106578635	-1.45564	1.12295	34.6933	2.59135e-08	6.97693e-07					ssa19	25576029	25576643	+
gene39686:106578625	-2.39907	0.652258	63.8301	3.89558e-13	4.59232e-11					ssa19	25612018	25614043	+
gene39687:106578624	-2.62705	-0.395115	23.6497	2.98006e-06	3.92309e-05					ssa19	25618487	25626189	+
gene39690:106578622	-2.40329	-0.317705	17.3794	5.24944e-05	0.000439733	XP_014013109.1	LOC106578622	zinc finger protein 271-like	protein_coding	ssa19	25703154	25704287	-	ZNF180
gene39714:106578601	-1.95685	-0.343128	18.1066	3.7352e-05	0.000331626	XP_014013070.1	LOC106578601	zinc finger protein 180-like	protein_coding	ssa19	27321597	27331616	+	ZNF180
gene3980:106580063	1.94691	1.66362	50.5451	4.9364e-11	3.16816e-09	XP_014016151.1	thbs3	thrombospondin 3	protein_coding	ssa02	20898577	20911434	-	THBS3
gene39833:106578746	1.09166	3.69194	40.4373	2.50304e-09	9.22254e-08	XP_014013355.1	gpr137b	G protein-coupled receptor 137B	protein_coding	ssa19	33296551	33308503	+	GPR137B
gene39845:106578757	1.22818	0.851211	10.875	0.00122676	0.00608914	XP_014013378.1	LOC106578757	zinc finger MIZ domain-containing protein 1-like	protein_coding	ssa19	34182713	34270755	+	ZMIZ1
gene3986:106580111	1.18698	3.10388	37.109	9.60039e-09	2.9958e-07	XP_014016271.1	LOC106580111	disintegrin and metalloproteinase domain-containing protein 15-like	protein_coding	ssa02	21009070	21039793	-	ADAM15
gene39866:106578775	1.76434	1.33158	12.4133	0.000571552	0.00323504	XP_014013402.1	LOC106578775	AT-rich interactive domain-containing protein 4B-like	protein_coding	ssa19	35405208	35425431	-
gene39880:106578786	1.6151	2.07801	21.4204	8.13429e-06	9.15978e-05	XP_014013420.1	LOC106578786	CSC1-like protein 2	protein_coding	ssa19	35968536	36044573	-	TMEM63B
gene3991:106580162	1.03222	6.89339	13.9176	0.000274974	0.00176511	XP_014016392.1	LOC106580162	ras-related and estrogen-regulated growth inhibitor-like protein	protein_coding	ssa02	21092091	21094327	+
gene39918:106578815	1.73556	0.267947	11.7172	0.000805679	0.00430427	XP_014013465.1	unc5b	unc-5 netrin receptor B	protein_coding	ssa19	37310711	37463098	-
gene39930:100196233	-1.13283	1.01644	22.7437	4.47178e-06	5.51877e-05	NP_001134734.1	ntpcr	nucleoside-triphosphatase%2C cancer-related	protein_coding	ssa19	38298209	38298464	-	NTPCR
gene39932:106578828	-1.28487	-0.451357	9.88783	0.00201958	0.00913494	XP_014013497.1	LOC106578828	serine/threonine-protein kinase SBK1-like	protein_coding	ssa19	38327504	38333581	-	SBK2
gene39941:106578836	-1.42877	-0.815606	10.7819	0.00128549	0.00632608					ssa19	38668812	38671668	-
gene40070:106578962	-1.03903	2.93742	12.0285	0.000691109	0.00377839	XP_014013766.1	LOC106578962	interferon-induced protein with tetratricopeptide repeats 5-like	protein_coding	ssa19	45693744	45701086	+	IFIT5
gene40087:106579040	-1.13655	1.26336	16.4236	8.2378e-05	0.000643834	XP_014013944.1	LOC106579040	nucleolar complex protein 3 homolog	protein_coding	ssa19	46147638	46158923	+
gene40089:106578978	1.00858	2.63001	27.0628	6.61672e-07	1.09422e-05	XP_014013813.1	LOC106578978	solute carrier family 35 member G1-like	protein_coding	ssa19	46245656	46249340	-	SLC35G1
gene40135:106579009	2.32516	1.77714	42.9647	9.17933e-10	3.89559e-08					ssa19	48182915	48265320	-
gene40143:106579016	1.81258	-0.688007	12.2077	0.000631896	0.00351639	XP_014013890.1	LOC106579016	dexamethasone-induced Ras-related protein 1-like	protein_coding	ssa19	48573858	48575689	-	RASD1
gene40177:106579334	1.08621	0.706106	15.1833	0.000148695	0.0010524					ssa19	50100456	50102616	-
gene40183:106579321	1.3857	2.97561	23.5989	3.05333e-06	3.99321e-05	XP_014014614.1	LOC106579321	unconventional myosin-Id-like	protein_coding	ssa19	50468390	50591082	-	MYO1D
gene4020:106580392	1.21338	1.97674	13.4551	0.000342678	0.0021111	XP_014016876.1	LOC106580392	annexin A2-like	protein_coding	ssa02	21728687	21737489	+
gene4022:106580429	-1.10752	2.68771	59.3786	1.9012e-12	1.85736e-10	XP_014016964.1	pmvk	phosphomevalonate kinase	protein_coding	ssa02	21765165	21768682	-	PMVK
gene40236:106579274	1.0968	2.30622	31.9234	8.24469e-08	1.85252e-06	XP_014014517.1	LOC106579274	twinkle protein%2C mitochondrial-like	protein_coding	ssa19	51641748	51648328	-	C10orf2
gene40238:106579272	1.55528	3.29804	48.1405	1.23096e-10	6.79552e-09	XP_014014508.1	sema4g	sema domain%2C immunoglobulin domain (Ig)%2C transmembrane domain (TM) and short cytoplasmic domain%2C (semaphorin) 4G	protein_coding	ssa19	51657576	51689046	-
gene40305:106579217	-2.89392	8.39703	324.528	8.76556e-39	1.488e-34	XP_014014386.1	LOC106579217	histone H1.0-B-like	protein_coding	ssa19	53359126	53360624	+	H1F0
gene40309:106579376	1.81542	-0.307797	13.1853	0.000390892	0.00235806	XP_014014689.1	LOC106579376	glucagon receptor-like	protein_coding	ssa19	53463245	53493416	-	GLP1R
gene4034:100195405	-1.12802	3.35637	65.5419	2.13757e-13	2.73859e-11	NP_001133906.1	ccne2	cyclin E2	protein_coding	ssa02	22185246	22190751	-
gene40373:106579160	2.34236	1.49982	40.9897	2.0077e-09	7.64162e-08	XP_014014241.1	LOC106579160	probable phosphatase phospho1	protein_coding	ssa19	55985828	55992080	-	PHOSPHO1
gene4053:106581253	1.26343	3.31145	29.0089	2.85161e-07	5.36631e-06	XP_014018661.1	LOC106581253	SH3 domain-binding protein 5-like	protein_coding	ssa02	22472460	22496426	-	SH3BP5
gene40588:106579464	-1.46829	0.910653	34.9513	2.32897e-08	6.36642e-07	XP_014014871.1	lrrc34	leucine rich repeat containing 34	protein_coding	ssa19	66767913	66793355	-	LRRC34
gene40618:106579507	2.69017	0.958015	62.025	7.37675e-13	8.05299e-11	XP_014014930.1	lnx2	ligand of numb-protein X 2	protein_coding	ssa19	67452990	67472638	+
gene40633:106579541	1.05049	3.7909	33.8377	3.69706e-08	9.39513e-07	XP_014015019.1	LOC106579541	uncharacterized LOC106579541	protein_coding	ssa19	67881549	67917416	-	SPATA13
gene40641:106579534	1.1581	4.64476	77.3448	3.8978e-15	8.37559e-13	XP_014015007.1	LOC106579534	mitochondrial fission regulator 1-like	protein_coding	ssa19	68323767	68337127	+	MTFR1
gene40691:106579574	1.90031	0.56281	9.70935	0.00221328	0.00982056	XP_014015084.1	LOC106579574	histone-lysine N-methyltransferase 2C-like	protein_coding	ssa19	70068307	70232546	+
gene4073:106581009	1.99294	-0.117035	14.5103	0.000205477	0.0013858	XP_014018140.1	LOC106581009	tyrosine-protein phosphatase non-receptor type 23-like	protein_coding	ssa02	23276519	23306253	-	PTPN23
gene40736:106579648	1.05631	2.3787	47.6175	1.50403e-10	8.14405e-09	XP_014015234.1	LOC106579648	zinc finger and BTB domain-containing protein 14-like	protein_coding	ssa19	72849444	72852692	+	ZBTB14
gene40757:106579631	-1.16315	1.64062	32.6601	6.04812e-08	1.41711e-06					ssa19	74090647	74096127	+
gene40771:106579663	-1.11774	0.514276	11.964	0.000712841	0.00387909					ssa19	74354184	74355947	+
gene40779:106579614	2.01423	5.12411	199.599	5.06392e-29	2.86542e-25	XP_014015176.1	LOC106579614	solute carrier family 22 member 17-like	protein_coding	ssa19	74481675	74493586	+	SLC22A17
gene40786:106579666	1.22687	2.92181	13.2218	0.00038468	0.0023272	XP_014015274.1	LOC106579666	uncharacterized LOC106579666	protein_coding	ssa19	74610922	74717923	-
gene40794:106579679	1.28978	3.46356	38.3583	5.778e-09	1.90086e-07	XP_014015284.1	LOC106579679	glucose-fructose oxidoreductase domain-containing protein 1-like	protein_coding	ssa19	75506290	75540105	+	GFOD1
gene40821:106579705	1.27984	1.68436	17.2967	5.45728e-05	0.000454787	XP_014015319.1	LOC106579705	late secretory pathway protein AVL9 homolog	protein_coding	ssa19	77873332	77924350	-	AVL9
gene40843:106579731	1.3755	1.73531	16.0749	9.71889e-05	0.000737849	XP_014015370.1	rdh10	retinol dehydrogenase 10 (all-trans)	protein_coding	ssa19	79456073	79475233	+	RDH10
gene40889:106579776	1.38965	0.218847	10.1246	0.00179096	0.00828629	XP_014015418.1	LOC106579776	NK-tumor recognition protein-like	protein_coding	ssa19	82863975	82906243	-	NKTR
gene40892:106579780	2.11394	-0.553242	12.3593	0.000586348	0.00330244	XP_014015421.1	LOC106579780	xin actin-binding repeat-containing protein 1-like	protein_coding	ssa19	82964848	82971269	-
gene40944:106579825	1.64587	0.568465	12.2002	0.000634266	0.00352726	XP_014015508.1	LOC106579825	heat shock protein beta-8-like	protein_coding	ssa20	3774135	3785494	+	HSPB8
gene40972:106580196	-1.10117	0.764392	10.5626	0.00143543	0.00691506					ssa20	5260036	5271512	+
gene40994:106580173	-1.08068	0.589119	16.7275	7.13498e-05	0.00057132	XP_014016419.1	LOC106580173	E3 ubiquitin-protein ligase TRIM36-like	protein_coding	ssa20	6194426	6219768	+	TRIM36
gene41008:106580160	-1.76763	1.47084	51.3784	3.60661e-11	2.41039e-09	XP_014016383.1	mblac2	metallo-beta-lactamase domain containing 2	protein_coding	ssa20	7432065	7436878	+	MBLAC2
gene41046:106580130	2.77979	4.0777	124.707	2.9564e-21	2.57366e-18	XP_014016312.1	LOC106580130	formin-binding protein 1-like	protein_coding	ssa20	11930618	11962433	-	FNBP1
gene4106:100286660	-1.03325	3.92338	63.47	4.42272e-13	5.12477e-11	NP_001140072.1	rab25	RAB25%2C member RAS oncogene family	protein_coding	ssa02	24294412	24300548	-	RAB25
gene41065:106580113	1.39562	0.0615243	11.8744	0.000745208	0.00402491	XP_014016272.1	LOC106580113	galactosylceramide sulfotransferase-like	protein_coding	ssa20	13054882	13075395	-
gene41076:106580103	1.36067	3.67037	62.5645	6.09143e-13	6.7585e-11	XP_014016248.1	fam222a	family with sequence similarity 222%2C member A	protein_coding	ssa20	13462329	13567308	+	FAM222A
gene41152:106580043	-1.1344	4.19087	81.2066	1.10292e-15	2.90273e-13	XP_014016082.1	LOC106580043	cyclin-G2-like	protein_coding	ssa20	16456063	16464873	-	CCNG2
gene41159:106580038	-1.69795	0.303834	26.046	1.03199e-06	1.5955e-05					ssa20	16584050	16586972	+
gene41176:106580023	-1.2705	-0.271951	9.99427	0.0019133	0.00875216					ssa20	16865054	16870032	+
gene41227:106579972	3.77062	1.80705	91.2643	4.55818e-17	1.64633e-14	XP_014015917.1	LOC106579972	calcium-binding mitochondrial carrier protein SCaMC-2-A-like	protein_coding	ssa20	18524495	18532052	+	SLC25A25
gene41235:106579965	-3.36223	-1.44431	12.1233	0.000658804	0.00363751	XP_014015905.1	LOC106579965	P2X purinoceptor 4-like	protein_coding	ssa20	18681840	18686566	+	P2RX4
gene4125:106581810	1.19416	2.39883	10.8069	0.00127052	0.00626423	XP_014019640.1	LOC106581810	synaptic vesicle glycoprotein 2A-like	protein_coding	ssa02	24765153	24816018	-
gene41250:106579956	1.5025	5.7072	109.984	1.72731e-19	1.0111e-16	XP_014015881.1	pptc7	PTC7 protein phosphatase homolog	protein_coding	ssa20	18965334	18974943	-	PPTC7
gene41354:106579868	-1.16979	3.02669	81.7631	9.21166e-16	2.4821e-13	XP_014015656.1	ankrd39	ankyrin repeat domain 39	protein_coding	ssa20	23136379	23140189	+
gene41366:106579855	1.27422	3.72349	12.8069	0.000472272	0.00276022	XP_014015618.1	LOC106579855	early growth response protein 3-like	protein_coding	ssa20	23581332	23589084	+	EGR3
gene41390:106579835	1.09175	2.55618	28.6453	3.33342e-07	6.11746e-06	XP_014015567.1	LOC106579835	type I inositol 1%2C4%2C5-trisphosphate 5-phosphatase-like	protein_coding	ssa20	24433121	24474469	-
gene41426:106580356	-2.55345	-0.354042	16.8731	6.6612e-05	0.000539619					ssa20	26196810	26201734	-
gene41508:106580395	2.26574	-0.367417	17.8231	4.26415e-05	0.000370072	XP_014016881.1	LOC106580395	SET-binding protein-like	protein_coding	ssa20	28851005	28858659	-
gene41518:106580481	-1.01315	1.9024	14.8268	0.000176434	0.00121824	XP_014017069.1	LOC106580481	noggin-3-like	protein_coding	ssa20	29110146	29111729	+	NOG
gene41551:106580428	-1.15263	6.17727	66.4597	1.5527e-13	2.0512e-11	XP_014016959.1	LOC106580428	dynein light chain 1%2C cytoplasmic	protein_coding	ssa20	30092709	30095417	+	DYNLL1
gene4157:106582110	1.58316	4.16489	89.9782	6.79706e-17	2.37904e-14	XP_014020337.1	LOC106582110	nuclear receptor subfamily 1 group D member 2-like	protein_coding	ssa02	25864118	25874524	+
gene4158:106582118	2.34004	2.81838	79.5768	1.87387e-15	4.64377e-13					ssa02	25864573	25868405	+
gene41590:106580460	1.08241	0.445664	9.80305	0.00210856	0.00944803	XP_014017034.1	LOC106580460	uncharacterized LOC106580460	protein_coding	ssa20	32085460	32116197	-
gene41666:106580541	1.62358	0.409638	19.5714	1.89405e-05	0.000187751	XP_014017206.1	LOC106580541	protein patched homolog 1-like	protein_coding	ssa20	36640650	36690831	+
gene41770:100196588	1.33946	1.17626	13.1187	0.000403838	0.00242496	NP_001135089.1	slr	somatolactin receptor	protein_coding	ssa20	39646703	39710374	-	GHR
gene4180:106582291	-1.16064	5.03878	30.9535	1.2517e-07	2.64281e-06	XP_014020701.1	LOC106582291	sclerostin domain-containing protein 1-like	protein_coding	ssa02	26482833	26485305	-	SOSTDC1
gene41811:106580653	2.28219	-0.785733	16.5361	7.81063e-05	0.000616122					ssa20	42112846	42116056	+
gene41882:106580735	-2.39627	-0.367974	22.2246	5.64932e-06	6.72275e-05	XP_014017558.1	LOC106580735	estrogen-related receptor gamma-like	protein_coding	ssa20	45674716	45687399	+
gene41894:100136356	-1.84235	2.18037	86.0907	2.30589e-16	7.18233e-14	XP_014017527.1	fkh	fork head domain protein	protein_coding	ssa20	45906635	45910746	-	FOXA3
gene4190:106582343	1.06102	5.11474	48.7699	9.67952e-11	5.56056e-09	XP_014020829.1	LOC106582343	RING finger protein 183-like	protein_coding	ssa02	26640800	26645778	-	RNF225
gene41906:106580757	1.88317	4.38835	96.2832	9.82681e-18	4.11889e-15	XP_014017614.1	LOC106580757	uncharacterized LOC106580757	protein_coding	ssa20	46281298	46297730	+
gene41917:106580765	-1.74033	0.603774	14.3988	0.000216827	0.00144343	XP_014017628.1	LOC106580765	calcineurin B homologous protein 2-like	protein_coding	ssa20	46460574	46470026	+	CHP2
gene41924:106580771	-1.12032	3.68882	62.1063	7.16668e-13	7.8489e-11	XP_014017643.1	LOC106580771	protein phosphatase 1 regulatory subunit 14A-like	protein_coding	ssa20	46663094	46674909	+	PPP1R14A
gene41925:106580772	1.37264	3.70741	25.07	1.59559e-06	2.29639e-05	XP_014017644.1	LOC106580772	tumor necrosis factor alpha-induced protein 2-like	protein_coding	ssa20	46675753	46705394	+
gene41928:106580775	1.33022	1.49293	12.2911	0.000606397	0.00339772	XP_014017651.1	LOC106580775	ubiquitin carboxyl-terminal hydrolase 2-like	protein_coding	ssa20	46727829	46768391	+
gene41948:100196425	-1.43629	3.70481	89.877	7.01478e-17	2.40564e-14	NP_001134926.1	xaf1	XIAP-associated factor 1	protein_coding	ssa20	47106225	47108875	-	XAF1
gene42017:106580856	-1.36065	1.36157	25.2534	1.46259e-06	2.13153e-05					ssa20	49933078	49942402	-
gene42034:106580870	-1.42243	1.1096	12.1974	0.000635166	0.0035317	XP_014017858.1	LOC106580870	leucine-rich repeat-containing protein 15-like	protein_coding	ssa20	50282311	50285640	+
gene42040:106580877	1.06992	2.51943	19.9563	1.58663e-05	0.000161281	XP_014017876.1	LOC106580877	frizzled-9-like	protein_coding	ssa20	50478086	50480968	-	FZD9
gene42080:106580930	1.51269	0.298692	15.206	0.00014709	0.00104299	XP_014017964.1	LOC106580930	A disintegrin and metalloproteinase with thrombospondin motifs 15-like	protein_coding	ssa20	52256635	52280922	-	ADAMTS15
gene42129:106580986	1.4964	3.54641	30.4825	1.52657e-07	3.14302e-06	XP_014018095.1	LOC106580986	stAR-related lipid transfer protein 13-like	protein_coding	ssa20	54243998	54337037	-	STARD13
gene42170:106581028	-1.00078	3.07338	57.7807	3.38849e-12	2.97267e-10	XP_014018170.1	LOC106581028	arsenite methyltransferase-like	protein_coding	ssa20	55848573	55856170	-	AS3MT
gene4220:106582593	2.42131	1.32382	25.541	1.29411e-06	1.93042e-05	XP_014021297.1	LOC106582593	sialoadhesin-like	protein_coding	ssa02	27141436	27150351	-
gene42203:106581056	1.10882	1.89248	31.0313	1.20222e-07	2.55263e-06	XP_014018241.1	LOC106581056	phosphorylase b kinase gamma catalytic chain%2C skeletal muscle/heart isoform-like	protein_coding	ssa20	57084569	57098801	-	PHKG1
gene42253:106581181	-1.38525	2.64301	50.7681	4.53812e-11	2.94596e-09	XP_014018536.1	LOC106581181	dynein light chain 2%2C cytoplasmic	protein_coding	ssa20	58386612	58390014	-
gene42295:106581150	-1.00268	4.14815	19.1153	2.34209e-05	0.000223611	XP_014018475.1	LOC106581150	rho GTPase-activating protein 32-like	protein_coding	ssa20	60237828	60267249	-
gene42296:106581149	-1.58486	0.321675	15.553	0.000124608	0.000908824	XP_014018472.1	LOC106581149	protein turtle homolog B-like	protein_coding	ssa20	60271067	60350929	-	IGSF9B
gene42302:106581145	1.99467	-0.0498948	21.1326	9.26623e-06	0.000102475	XP_014018460.1	LOC106581145	roundabout homolog 2-like	protein_coding	ssa20	60499516	60577799	+
gene42304:100286711	1.04662	7.91703	78.6486	2.53877e-15	6.0473e-13	XP_014018258.1	hsp7c	Heat shock cognate 71 kDa protein	protein_coding	ssa20	60601236	60611264	-	HSPA8
gene42336:106581115	-1.0264	3.32357	16.8533	6.72713e-05	0.000544181	XP_014018345.1	LOC106581115	tumor necrosis factor receptor superfamily member 19-like	protein_coding	ssa20	61478566	61545588	-	TNFRSF19
gene42340:106581112	-1.33854	2.417	55.6459	7.38958e-12	6.002e-10	XP_014018340.1	LOC106581112	trafficking protein particle complex subunit 4-like	protein_coding	ssa20	61567274	61568964	+	TRAPPC4
gene42354:106581100	-1.32709	1.52299	15.1745	0.000149323	0.00105618	XP_014018309.1	LOC106581100	homeobox protein BarH-like 2	protein_coding	ssa20	62161791	62176646	+	BARX2
gene42360:106581096	-1.17113	2.8892	11.5916	0.000858886	0.00454235	XP_014018288.1	LOC106581096	ATP-sensitive inward rectifier potassium channel 1-like	protein_coding	ssa20	63210753	63221722	-	KCNJ1
gene42395:106581249	-1.74825	-0.456349	17.749	4.41441e-05	0.000380487					ssa20	65151719	65153596	+
gene4241:106582751	1.18438	4.41749	56.1114	6.22955e-12	5.16741e-10	XP_014021618.1	LOC106582751	uncharacterized LOC106582751	protein_coding	ssa02	27629563	27641285	-
gene42443:106581296	1.90022	0.177361	13.7947	0.000290495	0.0018497	XP_014018734.1	LOC106581296	coatomer subunit beta'-like	protein_coding	ssa20	67339025	67357470	-
gene42445:100195631	2.50218	0.831972	46.1881	2.60846e-10	1.31005e-08	NP_001134132.1	kcne4	potassium voltage-gated channel%2C Isk-related family%2C member 4	protein_coding	ssa20	67585141	67586520	-	KCNE4
gene42488:106581345	1.95139	-0.132352	11.9387	0.000721835	0.00391549	XP_014018822.1	LOC106581345	protocadherin Fat 3-like	protein_coding	ssa20	69800007	70088131	-
gene42505:106581358	-1.29033	1.1653	26.666	7.86713e-07	1.26347e-05	XP_014018840.1	LOC106581358	transcription cofactor HES-6-like	protein_coding	ssa20	70599841	70601610	+	HES6
gene42557:106581408	1.36325	0.17188	15.8224	0.000109589	0.000816652					ssa20	74839565	74841179	-
gene42580:106581433	1.26102	2.93075	26.3445	9.05437e-07	1.42581e-05	XP_014018969.1	LOC106581433	pentraxin-related protein PTX3-like	protein_coding	ssa20	76538603	76553065	-	PTX3
gene42596:106581451	1.04732	2.82281	11.4682	0.000912629	0.00476834	XP_014018991.1	tiparp	TCDD-inducible poly(ADP-ribose) polymerase	protein_coding	ssa20	77262445	77291073	-	TIPARP
gene42640:106581491	1.39833	-0.0219452	14.7357	0.000184334	0.00126329	XP_014019041.1	LOC106581491	P2Y purinoceptor 13-like	protein_coding	ssa20	78702974	78707804	-	P2RY13
gene42647:106581498	1.18965	1.52344	13.5847	0.000321717	0.00200194	XP_014019056.1	LOC106581498	muscleblind-like protein 1	protein_coding	ssa20	79048779	79242203	+
gene42649:106581490	1.87386	0.50682	13.803	0.000289316	0.00184358	XP_014019040.1	LOC106581490	pumilio homolog 1-like	protein_coding	ssa20	79313416	79323813	-
gene42658:106581509	1.25441	0.62419	10.9966	0.00115422	0.00579172	XP_014019080.1	LOC106581509	T-lymphoma invasion and metastasis-inducing protein 1-like	protein_coding	ssa20	79595137	79608083	-	TIAM1
gene42681:106581531	1.59037	1.69562	16.4092	8.30009e-05	0.000647361	XP_014019120.1	LOC106581531	T-lymphoma invasion and metastasis-inducing protein 1-like	protein_coding	ssa20	80625447	80746787	+	TIAM1
gene42686:106581536	1.36952	0.0173838	12.3633	0.000585193	0.00329867	XP_014019126.1	LOC106581536	1%2C4-alpha-glucan-branching enzyme-like	protein_coding	ssa20	80822864	80867812	+	GBE1
gene42734:106581582	2.11232	0.0378455	16.0983	9.61148e-05	0.000731166	XP_014019184.1	LOC106581582	transcriptional coactivator YAP1-like	protein_coding	ssa20	84267889	84268792	+	YAP1
gene42735:106581583	1.21866	1.7172	16.8886	6.61275e-05	0.000536373	XP_014019185.1	LOC106581583	mastermind-like protein 2	protein_coding	ssa20	84291780	84293450	+	MAML2
gene42809:106581647	1.28878	1.1345	11.3471	0.00096866	0.00500487	XP_014019299.1	LOC106581647	non-syndromic hearing impairment protein 5 homolog	protein_coding	ssa21	4850949	4859709	-
gene42843:106581661	1.0479	0.687264	11.6594	0.000829152	0.00440955	XP_014019338.1	LOC106581661	C-X-C chemokine receptor type 1-like	protein_coding	ssa21	7299651	7302102	-
gene42867:106581867	1.13255	1.97275	14.504	0.0002061	0.00138808	XP_014019767.1	hdac4	histone deacetylase 4	protein_coding	ssa21	10691696	10955521	+	HDAC4
gene42870:106581864	-1.56917	0.60604	16.462	8.08926e-05	0.000634562	XP_014019765.1	asb1	ankyrin repeat and SOCS box containing 1	protein_coding	ssa21	11047335	11058987	-	ASB1
gene42905:106581841	1.22622	5.38207	28.6064	3.42839e-07	6.25791e-06	XP_014019723.1	LOC106581841	C-X-C chemokine receptor type 4-like	protein_coding	ssa21	12348040	12350021	+	CXCR4
gene42916:106581833	-2.12825	3.95201	89.9754	6.89036e-17	2.38709e-14	XP_014019711.1	LOC106581833	protein FEV	protein_coding	ssa21	13024303	13028105	-	FEV
gene42918:106581832	-1.15228	0.424174	15.1773	0.000149124	0.00105521	XP_014019709.1	LOC106581832	uridine 5'-monophosphate synthase-like	protein_coding	ssa21	13043248	13046606	-	UMPS
gene42922:106581828	1.03875	2.99696	9.81035	0.00210326	0.00943424	XP_014019684.1	LOC106581828	formin-like protein 2	protein_coding	ssa21	13463242	13556650	+	FMNL2
gene42940:106581811	1.25625	2.35143	15.4224	0.000132678	0.000957927	XP_014019639.1	tanc1	tetratricopeptide repeat%2C ankyrin repeat and coiled-coil containing 1	protein_coding	ssa21	14431039	14617291	+	TANC1
gene42948:106581806	-1.39427	2.68559	58.3676	2.73899e-12	2.49977e-10	XP_014019614.1	tbr1	T-box%2C brain%2C 1	protein_coding	ssa21	14877417	14882065	+	TBR1
gene42955:106581801	1.10267	5.09272	42.5932	1.06532e-09	4.4488e-08	XP_014019597.1	LOC106581801	growth factor receptor-bound protein 14-like	protein_coding	ssa21	15319638	15378404	-	GRB14
gene43004:106581758	-1.49454	3.07858	45.8375	2.98759e-10	1.47644e-08	XP_014019504.1	LOC106581758	cell division cycle-associated protein 7-like	protein_coding	ssa21	16814373	16817638	+	CDCA7
gene43017:106581745	-1.01656	0.874509	12.2303	0.000624898	0.0034843	XP_014019468.1	LOC106581745	testis-expressed sequence 30 protein-like	protein_coding	ssa21	17421282	17425351	+	TEX30
gene43038:106581900	-1.55545	3.26026	45.9107	2.90412e-10	1.43938e-08	XP_014019816.1	LOC106581900	high affinity cGMP-specific 3'%2C5'-cyclic phosphodiesterase 9A-like	protein_coding	ssa21	18967938	19002549	+	PDE9A
gene4305:106583301	-1.50723	0.411688	24.7192	1.85218e-06	2.60279e-05	XP_014022817.1	LOC106583301	forkhead box protein O3-like	protein_coding	ssa02	30601170	30639050	+
gene43068:106581923	1.57814	2.7505	29.0236	2.83865e-07	5.34525e-06	XP_014019871.1	LOC106581923	NGFI-A-binding protein 1-like	protein_coding	ssa21	19772137	19788177	-	NAB1
gene4308:106583350	-2.05691	-0.309846	19.2651	2.18153e-05	0.000210832	XP_014022922.1	LOC106583350	zinc finger and SCAN domain-containing protein 2-like	protein_coding	ssa02	30832448	30835841	-
gene43092:106581890	-2.55512	1.78755	70.2951	4.14611e-14	6.51688e-12	XP_014019802.1	LOC106581890	major histocompatibility complex class I-related gene protein-like	protein_coding	ssa21	21859913	21861393	-
gene43093:106581936	1.41965	0.23063	14.8256	0.000176539	0.00121872	XP_014019931.1	LOC106581936	coagulation factor V-like	protein_coding	ssa21	21866650	21884439	-	F5
gene43112:106581876	1.60368	-0.921928	11.0472	0.00112531	0.00566928	XP_014019791.1	LOC106581876	UDP-glucuronosyltransferase-like	protein_coding	ssa21	22897665	22905879	-	UGT1A1
gene43113:106581954	1.4852	5.6598	72.9704	1.70149e-14	3.02447e-12	XP_014020002.1	LOC106581954	UDP-glucuronosyltransferase-like	protein_coding	ssa21	22908508	22918191	-	UGT1A1
gene43185:106582008	1.28328	1.36376	12.8262	0.000466031	0.00272859	XP_014020113.1	LOC106582008	filamin A-interacting protein 1-like	protein_coding	ssa21	25772346	25829279	-	FILIP1L
gene4320:100136446	1.00296	5.05772	13.8357	0.000285966	0.00182634	NP_001117051.1	LOC100136446	C type lectin receptor A	protein_coding	ssa02	31018132	31022105	+
gene43219:100306725	2.03052	1.09649	14.0085	0.00026225	0.00169791	NP_001158736.1	co4a1	Collagen alpha-1IV chain	protein_coding	ssa21	27062284	27096268	+
gene43251:106582107	1.56188	4.97469	89.6622	7.50083e-17	2.45257e-14	XP_014020328.1	LOC106582107	sodium/myo-inositol cotransporter-like	protein_coding	ssa21	28951679	28957482	+	SLC5A3
gene43271:106582091	2.43127	1.3283	74.769	9.16252e-15	1.76748e-12	XP_014020302.1	LOC106582091	radixin	protein_coding	ssa21	29756518	29785455	-	RDX
gene43295:106582070	-1.0436	1.29276	27.6492	5.1279e-07	8.80614e-06	XP_014020260.1	LOC106582070	uncharacterized LOC106582070	protein_coding	ssa21	30651002	30655970	+
gene43434:106582272	1.17617	-0.328686	11.5393	0.000880182	0.00462873	XP_014020648.1	znf385b	zinc finger protein 385B	protein_coding	ssa21	36720792	36883218	+	ZNF385B
gene43531:106582364	-1.27054	0.430402	13.6495	0.000311726	0.00195372					ssa21	43716124	43718064	+
gene43532:106582363	-1.44035	-0.00332158	12.9093	0.000447423	0.00264136					ssa21	43718562	43719522	+
gene43566:106582401	1.35048	5.30629	17.4388	5.14821e-05	0.000432534	XP_014020966.1	LOC106582401	uncharacterized LOC106582401	protein_coding	ssa21	46086116	46116462	-
gene43593:100136911	1.68882	3.80952	30.7664	1.36305e-07	2.84605e-06	NP_001117156.1	ahr2a	aryl hydrocarbon receptor 2 alpha	protein_coding	ssa21	48523002	48594637	+
gene43666:106582497	1.31387	2.28607	15.2728	0.000142564	0.00101723	XP_014021137.1	LOC106582497	integrator complex subunit 6-like	protein_coding	ssa21	52592024	52634776	+	INTS6
gene43715:106582546	2.41725	-0.0567472	14.5045	0.000206051	0.00138802	XP_014021206.1	LOC106582546	uncharacterized LOC106582546	protein_coding	ssa21	56087741	56095782	-
gene43719:106582550	1.55405	-0.139123	9.93781	0.00196894	0.00895117	XP_014021212.1	LOC106582550	protein FAM117B-like	protein_coding	ssa21	56186641	56230969	+	FAM117B
gene43726:106582557	1.2463	3.65346	23.9768	2.58433e-06	3.47213e-05	XP_014021235.1	LOC106582557	unconventional myosin-X-like	protein_coding	ssa21	56355422	56438086	+	MYO10
gene43754:106582584	1.87768	0.376193	12.4675	0.00055589	0.00316246	XP_014021284.1	LOC106582584	disco-interacting protein 2 homolog A-like	protein_coding	ssa21	57506262	57573314	+	DIP2C
gene43757:106582586	1.75033	-0.78727	9.91538	0.00199151	0.00902959	XP_014021287.1	LOC106582586	speckle-type POZ protein-like A	protein_coding	ssa21	57743081	57754583	+	SPOPL
gene43787:106582595	1.13105	1.86798	16.2843	8.79943e-05	0.000678499					ssa22	2717295	2777711	+
gene43813:106582660	-1.97211	0.748499	30.4405	1.54528e-07	3.16754e-06	XP_014021394.1	LOC106582660	mitogen-activated protein kinase kinase kinase 12-like	protein_coding	ssa22	4158875	4221924	+	MAP3K12
gene43837:106582680	-1.5251	0.306684	17.0377	6.16422e-05	0.000503929					ssa22	5989984	5993338	-
gene4384:106584098	-1.66159	0.251831	24.7676	1.81293e-06	2.56035e-05	XP_014024409.1	LOC106584098	fasciculation and elongation protein zeta-2-like	protein_coding	ssa02	34734788	34768463	-
gene43885:106582617	-2.12709	-0.139246	19.6247	1.84808e-05	0.000183731	XP_014021318.1	LOC106582617	adenosine receptor A1-like	protein_coding	ssa22	8432034	8434004	-
gene43895:106582726	1.91916	5.98525	303.72	2.3548e-37	2.66493e-33	XP_014021572.1	LOC106582726	mitochondrial glutamate carrier 1-like	protein_coding	ssa22	8751131	8764328	-
gene43909:106582741	1.04755	2.37806	16.442	8.16617e-05	0.000639266	XP_014021597.1	LOC106582741	CTTNBP2 N-terminal-like protein	protein_coding	ssa22	9563720	9589605	-	CTTNBP2NL
gene43924:106582757	-2.49945	2.48813	92.8494	2.79417e-17	1.0904e-14	XP_014021622.1	LOC106582757	caM kinase-like vesicle-associated protein	protein_coding	ssa22	10579245	10624582	+
gene43942:106582770	-1.39021	1.68123	35.5919	1.78797e-08	5.07553e-07	XP_014021657.1	cssa22h3orf18	chromosome ssa22 open reading frame%2C human C3orf18	protein_coding	ssa22	11162311	11169216	+	C3orf18
gene43967:106582811	2.17281	-0.533872	13.6829	0.000306708	0.00192977	XP_014021738.1	LOC106582811	kazrin-like	protein_coding	ssa22	11784916	11789183	-	KAZN
gene43968:106582810	1.67088	2.21682	34.2688	3.0903e-08	8.07067e-07	XP_014021736.1	LOC106582810	kazrin-like	protein_coding	ssa22	11789671	11947643	-	KAZN
gene43975:106582817	-1.00471	1.64677	19.6151	1.85629e-05	0.000184386	XP_014021749.1	LOC106582817	plectin-like	protein_coding	ssa22	12127017	12156816	+
gene43983:106582826	1.35194	2.87426	47.1041	1.83196e-10	9.62799e-09	XP_014021780.1	LOC106582826	membrane metallo-endopeptidase-like 1	protein_coding	ssa22	12333321	12382520	+	MMEL1
gene43991:106582833	1.32735	1.90515	10.5026	0.00148069	0.00709338	XP_014021799.1	LOC106582833	ras association domain-containing protein 5-like	protein_coding	ssa22	12578127	12624527	+	RASSF5
gene4402:106584263	1.1128	3.01974	36.5125	1.22512e-08	3.70714e-07	XP_014024790.1	gmeb1	glucocorticoid modulatory element binding protein 1	protein_coding	ssa02	35627556	35646630	+
gene44030:106582862	-1.62405	0.679545	28.3745	3.74646e-07	6.74065e-06	XP_014021886.1	LOC106582862	zinc finger MYM-type protein 1-like	protein_coding	ssa22	14769371	14772468	-
gene44135:106583028	1.16886	3.35387	12.0663	0.000679285	0.00373327	XP_014022244.1	LOC106583028	A disintegrin and metalloproteinase with thrombospondin motifs 9-like	protein_coding	ssa22	19251294	19323602	+	ADAMTS9
gene44144:106582942	-1.58043	1.76942	13.1881	0.000390568	0.00235653	XP_014022062.1	LOC106582942	synaptoporin-like	protein_coding	ssa22	19527955	19561693	-	SYNPR
gene44168:106583001	1.5258	0.160965	18.1054	3.73735e-05	0.00033173	XP_014022173.1	plxna2	plexin A2	protein_coding	ssa22	21971495	22022393	-	PLXNA2
gene44237:106583131	-2.44937	1.13722	67.7991	9.76345e-14	1.35852e-11	XP_014022435.1	LOC106583131	calmodulin-binding transcription activator 1-like	protein_coding	ssa22	25427541	25554003	-	CAMTA1
gene44250:106583121	2.39727	0.324001	19.4086	2.0417e-05	0.000199993	XP_014022428.1	LOC106583121	ethanolamine kinase 1-like	protein_coding	ssa22	26010040	26044072	-	ETNK1
gene44252:106583117	1.70245	1.27649	30.1874	1.72121e-07	3.47218e-06	XP_014022425.1	LOC106583117	solute carrier family 41 member 1-like	protein_coding	ssa22	26065343	26132907	-	SLC41A1
gene44299:106583079	3.04753	1.42954	50.2531	5.52904e-11	3.4634e-09	XP_014022345.1	LOC106583079	potassium voltage-gated channel subfamily C member 1-like	protein_coding	ssa22	27556318	27560794	+
gene443:106581812	1.99841	-0.830494	9.74195	0.00217518	0.0096877	XP_014019692.1	LOC106581812	uncharacterized protein C15orf52-like	protein_coding	ssa01	21870341	21918146	+	C15orf52
gene44314:106583068	-1.1903	3.78025	72.9896	1.66379e-14	2.97302e-12	XP_014022326.1	LOC106583068	prefoldin subunit 5-like	protein_coding	ssa22	27832511	27835516	-	PFDN5
gene44366:100195403	1.00531	6.28098	65.1304	2.46816e-13	3.04715e-11	XP_014022468.1	ip6k2	inositol hexaphosphate kinase 2	protein_coding	ssa22	29231819	29244460	-
gene44393:106583179	2.25243	0.359584	40.7237	2.23244e-09	8.39354e-08	XP_014022550.1	LOC106583179	prostacyclin synthase-like	protein_coding	ssa22	30845587	30858215	+	PTGIS
gene44398:106583174	1.02491	2.20988	11.2098	0.00103743	0.0053029	XP_014022537.1	LOC106583174	cyclic AMP-dependent transcription factor ATF-7-like	protein_coding	ssa22	31062398	31068263	+	ATF7
gene44423:106583303	1.49623	5.38626	64.5247	3.10408e-13	3.75041e-11	XP_014022815.1	LOC106583303	nuclear receptor subfamily 1 group D member 1-like	protein_coding	ssa22	32344989	32360627	-
gene44460:106583277	2.49997	1.1604	25.3466	1.40775e-06	2.06723e-05	XP_014022722.1	pmel	premelanosome protein	protein_coding	ssa22	33473472	33480905	-	PMEL
gene44465:106583274	1.53578	1.47083	26.0782	1.01754e-06	1.57603e-05	XP_014022712.1	LOC106583274	uncharacterized LOC106583274	protein_coding	ssa22	33626525	33655479	+
gene44502:106583335	1.04095	5.42088	168.594	4.83666e-26	1.17292e-22	XP_014022891.1	LOC106583335	inositol polyphosphate 1-phosphatase-like	protein_coding	ssa22	34482817	34492601	-	INPP1
gene44581:106583544	1.07123	-0.366945	10.0607	0.00184986	0.00851331					ssa22	37506392	37514568	-
gene44582:100196052	3.64805	5.07802	90.1342	7.34306e-17	2.44416e-14	NP_001134553.1	fkbp5	FK506 binding protein 5	protein_coding	ssa22	37514764	37546894	+
gene44651:106583488	1.39747	1.69268	10.878	0.00122572	0.00608578	XP_014023197.1	LOC106583488	cryptochrome-1-like	protein_coding	ssa22	40954848	40967929	+	CRY1
gene44664:100136532	1.28184	4.89295	75.8799	6.32964e-15	1.29456e-12	XP_014022919.1	LOC100136532	peroxisomal proliferator-activated receptor beta1A	protein_coding	ssa22	41196926	41250750	+	PPARD
gene44669:106583478	-2.16153	0.155151	28.219	4.00669e-07	7.14825e-06	XP_014023181.1	LOC106583478	G0/G1 switch protein 2-like	protein_coding	ssa22	41312074	41313276	+	G0S2
gene44670:106583476	-1.65556	-0.380513	16.7205	7.15864e-05	0.000572674	XP_014023170.1	LOC106583476	low-density lipoprotein receptor class A domain-containing protein 2-like	protein_coding	ssa22	41318050	41337270	-
gene44674:106583475	1.45696	1.23508	28.0396	4.32985e-07	7.62067e-06	XP_014023162.1	LOC106583475	ataxin-7-like protein 2	protein_coding	ssa22	41363741	41373122	-	ATXN7L2
gene44744:106583415	4.28857	-0.834761	45.1851	3.84892e-10	1.8379e-08	XP_014023026.1	LOC106583415	neuroendocrine convertase 1-like	protein_coding	ssa22	43527443	43554544	-
gene44778:106583585	-1.2957	0.782789	14.4149	0.000215154	0.00143595	XP_014023418.1	LOC106583585	GTPase IMAP family member 4-like	protein_coding	ssa22	45555136	45557282	+
gene44798:106583612	-1.08555	2.68163	49.13	8.43935e-11	5.00917e-09					ssa22	47278669	47283887	+
gene4485:106586326	-1.21532	0.11646	13.0936	0.000408819	0.00245053	XP_014028979.1	LOC106586326	cytoplasmic dynein 1 light intermediate chain 1-like	protein_coding	ssa02	40326619	40346280	+	DYNC1LI1
gene44917:100194771	1.53513	6.13106	65.7911	2.00783e-13	2.59193e-11	NP_001133272.1	slc6a6	solute carrier family 6 (neurotransmitter transporter)%2C member 6	protein_coding	ssa22	54262723	54297847	-	SLC6A6
gene44920:106583721	-1.52688	-0.643416	9.96422	0.00194271	0.00885533	XP_014023730.1	LOC106583721	gamma-glutamyl hydrolase-like	protein_coding	ssa22	54445270	54453177	+	GGH
gene45005:106583767	1.23726	2.29544	14.3758	0.000219347	0.00145621	XP_014023801.1	LOC106583767	homeodomain-interacting protein kinase 1-like	protein_coding	ssa22	57609684	57658580	-	HIPK1
gene45006:106583765	-2.40367	1.5629	24.4495	2.09973e-06	2.89318e-05	XP_014023799.1	LOC106583765	RING finger protein 208-like	protein_coding	ssa22	57671336	57676044	-	RNF186
gene45218:106583970	-1.36917	0.290189	14.2092	0.000237627	0.00155657	XP_014024169.1	LOC106583970	prostaglandin G/H synthase 2-like	protein_coding	ssa23	4742836	4751421	+	PTGS2
gene45229:106583982	1.52808	-0.102313	11.5254	0.000886315	0.00465377					ssa23	5931585	5936794	+
gene4523:106586151	-1.06063	1.6353	20.8426	1.05753e-05	0.000114272					ssa02	41425069	41437810	+
gene45253:106584018	1.0559	3.65741	12.0338	0.000690185	0.00377456	XP_014024248.1	LOC106584018	tyrosine-protein kinase receptor Tie-1-like	protein_coding	ssa23	7660187	7687145	-	TIE1
gene45260:100194511	1.02957	3.96173	58.6111	2.50791e-12	2.32639e-10	NP_001133069.1	dmrt2b	doublesex and mab-3 related transcription factor 2b	protein_coding	ssa23	7850118	7858381	-
gene45278:106584037	2.11447	6.74041	147.106	8.7997e-24	1.49379e-20	XP_014024318.1	LOC106584037	cAMP-specific 3'%2C5'-cyclic phosphodiesterase 4B-like	protein_coding	ssa23	9623137	9931011	+	PDE4B
gene45295:106583993	3.03224	-0.0582633	38.7723	4.88714e-09	1.65427e-07					ssa23	11013359	11023785	-
gene45307:106584062	1.2545	1.26596	14.8647	0.00017325	0.00120041	XP_014024368.1	LOC106584062	cytochrome P450 2J2-like	protein_coding	ssa23	11294552	11321718	-	CYP2J2
gene45312:106584067	1.21601	0.467564	13.9698	0.000266833	0.00172196	XP_014024376.1	LOC106584067	tensin-3-like	protein_coding	ssa23	11890299	11972778	+	TNS3
gene45347:106584097	-1.18705	2.35571	16.7849	6.94437e-05	0.000558667	XP_014024406.1	LOC106584097	forkhead box protein Q1-like	protein_coding	ssa23	12841445	12842886	+	FOXQ1
gene45350:106584199	2.1442	0.247405	24.4954	2.04541e-06	2.83676e-05	XP_014024681.1	LOC106584199	myosin light chain kinase family member 4-like	protein_coding	ssa23	13265490	13332931	-	MYLK4
gene45383:106584172	-1.50279	3.77186	78.3197	2.82804e-15	6.44395e-13	XP_014024594.1	LOC106584172	growth arrest and DNA damage-inducible protein GADD45 alpha-like	protein_coding	ssa23	16313911	16319847	+	GADD45A
gene45457:106584107	1.25207	5.81637	181.806	2.39791e-27	7.40105e-24	XP_014024444.1	LOC106584107	DCN1-like protein 4	protein_coding	ssa23	20890081	20899016	-	DCUN1D4
gene45475:106584219	1.57359	2.32862	27.354	5.82929e-07	9.77817e-06	XP_014024733.1	LOC106584219	cytoplasmic polyadenylation element-binding protein 2-like	protein_coding	ssa23	21522146	21540135	-
gene45510:106584280	-1.13281	5.26919	42.7379	1.00804e-09	4.25673e-08	XP_014024821.1	LOC106584280	transcription factor AP-1-like	protein_coding	ssa23	23128035	23130141	+	JUN
gene45514:106584284	1.59711	0.575629	20.5384	1.21513e-05	0.000128587	XP_014024830.1	LOC106584284	angiopoietin-related protein 1-like	protein_coding	ssa23	23309853	23343890	+	ANGPTL1
gene45529:106584295	1.07666	5.89368	69.124	6.18875e-14	8.90315e-12	XP_014024843.1	tgm1	transglutaminase 1	protein_coding	ssa23	23839942	23859379	+	TGM1
gene45541:106584304	-1.45036	1.50947	25.3894	1.37746e-06	2.03508e-05	XP_014024863.1	LOC106584304	zinc finger matrin-type protein 3-like	protein_coding	ssa23	24075636	24089744	+	ZMAT3
gene45561:106584319	1.26813	5.00626	75.3293	7.60137e-15	1.51321e-12	XP_014024919.1	LOC106584319	Abelson tyrosine-protein kinase 2-like	protein_coding	ssa23	26248935	26292225	+	ABL2
gene45585:106584342	-1.10727	1.68807	18.9728	2.49737e-05	0.000235982	XP_014025020.1	LOC106584342	transcription factor Sox-2-like	protein_coding	ssa23	27982140	27985000	-	SOX2
gene45589:106584346	-2.20004	-0.384266	15.7918	0.000111195	0.000826438	XP_014025029.1	LOC106584346	uncharacterized LOC106584346	protein_coding	ssa23	28155168	28160303	-
gene45599:106584352	-1.39369	2.01824	37.4758	8.26744e-09	2.60862e-07					ssa23	28788593	28792670	-
gene45600:106584353	-1.56433	0.193101	20.4744	1.25119e-05	0.000131923					ssa23	28792270	28797555	+
gene45630:106584368	1.18276	6.1373	25.3206	1.43559e-06	2.09994e-05	XP_014025071.1	LOC106584368	MAP kinase-interacting serine/threonine-protein kinase 2-like	protein_coding	ssa23	29300421	29316885	-	MKNK2
gene45633:106584371	1.5373	2.83658	22.0063	6.25442e-06	7.32726e-05	XP_014025075.1	LOC106584371	A disintegrin and metalloproteinase with thrombospondin motifs 10-like	protein_coding	ssa23	29344638	29406020	+	ADAMTS10
gene4564:106585752	1.02951	8.37124	36.6662	1.15251e-08	3.51874e-07	XP_014027804.1	LOC106585752	nucleoplasmin-like protein ANO39	protein_coding	ssa02	42556427	42563642	+
gene45653:106584385	-1.14159	2.53512	43.8788	6.40946e-10	2.86703e-08	XP_014025111.1	LOC106584385	Krueppel-like factor 9	protein_coding	ssa23	30170791	30178411	+
gene45757:106584464	-1.10595	3.00659	58.8835	2.2728e-12	2.15267e-10	XP_014025299.1	LOC106584464	gastrula zinc finger protein XlCGF57.1-like	protein_coding	ssa23	34197881	34207683	-
gene45762:106584460	-1.2033	1.93044	33.4158	4.40817e-08	1.09242e-06	XP_014025292.1	LOC106584460	28S ribosomal protein S35%2C mitochondrial-like	protein_coding	ssa23	34278424	34296084	-
gene45769:106584491	-1.01446	0.984219	16.3724	8.43968e-05	0.000656138	XP_014025336.1	LOC106584491	tyrosine--tRNA ligase%2C mitochondrial-like	protein_coding	ssa23	34796629	34803214	-
gene45776:106584498	1.30084	0.806181	11.098	0.00109707	0.00555587	XP_014025348.1	LOC106584498	sodium- and chloride-dependent GABA transporter 2-like	protein_coding	ssa23	35265841	35314108	+	SLC6A13
gene45827:106584547	-1.16399	0.634437	15.801	0.000110711	0.000823745	XP_014025440.1	LOC106584547	gastrula zinc finger protein XlCGF57.1-like	protein_coding	ssa23	36817094	36825880	+
gene45851:106584574	-1.74076	-0.653168	14.6998	0.000187545	0.0012809	XP_014025487.1	fam19a5	family with sequence similarity 19 (chemokine (C-C motif)-like)%2C member A5	protein_coding	ssa23	38255083	38382546	-	FAM19A5
gene45860:106584599	-1.29109	-0.209544	11.4325	0.000928284	0.00483451	XP_014025546.1	LOC106584599	plasma membrane calcium-transporting ATPase 1-like	protein_coding	ssa23	39032351	39075334	+	ATP2B1
gene45867:106584592	1.02257	3.93595	28.1019	4.2147e-07	7.44502e-06	XP_014025531.1	LOC106584592	dual specificity protein phosphatase 8-like	protein_coding	ssa23	39402393	39513995	+
gene45894:106584622	-1.88284	-0.112262	13.7319	0.000299486	0.00189557					ssa23	40565156	40569267	-
gene45901:106584628	1.58611	4.83545	134.592	2.07371e-22	2.34681e-19	XP_014025587.1	LOC106584628	protein phosphatase 1 regulatory subunit 15A-like	protein_coding	ssa23	40740383	40743893	-	PPP1R15A
gene45916:106584673	-1.30022	2.79275	57.8333	3.32448e-12	2.9393e-10	XP_014025652.1	LOC106584673	protein FAM60A-like	protein_coding	ssa23	41069536	41079543	-	FAM60A
gene4594:106585476	1.27317	1.96575	11.5965	0.000855928	0.00452854	XP_014027197.1	LOC106585476	histone-lysine N-methyltransferase SETD1A-like	protein_coding	ssa02	43660005	43689455	+	SETD1A
gene46071:106584801	-1.10446	2.53178	41.4365	1.6806e-09	6.64014e-08	XP_014025872.1	tmem80	transmembrane protein 80	protein_coding	ssa23	46617394	46623075	-	TMEM80
gene4609:106588430	1.2088	2.33235	22.7923	4.37512e-06	5.41128e-05	XP_014032895.1	LOC106588430	E3 SUMO-protein ligase CBX4-like	protein_coding	ssa02	44260810	44266119	+	CBX4
gene46119:106584850	1.54657	3.68225	78.587	2.59055e-15	6.08113e-13	XP_014025930.1	LOC106584850	dnaJ homolog subfamily A member 4-like	protein_coding	ssa23	48733025	48755388	+	DNAJA4
gene46186:106585245	-1.53019	0.950027	24.6135	1.94098e-06	2.71522e-05	XP_014026720.1	rfc5	replication factor C (activator 1) 5%2C 36.5kDa	protein_coding	ssa24	2528393	2548895	-
gene46202:106584946	-2.51947	0.43745	48.8302	9.4598e-11	5.47137e-09					ssa24	3309166	3311141	-
gene46207:106584944	-1.09995	1.49224	28.9466	2.92809e-07	5.48327e-06					ssa24	4139659	4148392	-
gene4622:106588356	-1.26975	2.07183	49.5757	7.12443e-11	4.32704e-09	XP_014032724.1	LOC106588356	zinc finger protein 382-like	protein_coding	ssa02	44461231	44470122	-
gene46248:106585191	1.11309	6.76758	70.4935	3.87491e-14	6.17639e-12	XP_014026601.1	LOC106585191	ephrin-A5b-like	protein_coding	ssa24	6210418	6328418	-	EFNA5
gene4626:106586546	-1.1735	1.73097	31.0665	1.18439e-07	2.52109e-06	XP_014029442.1	LOC106586546	DNA polymerase subunit gamma-2%2C mitochondrial-like	protein_coding	ssa02	44580740	44584116	+
gene46276:106585173	1.16036	2.53862	53.4079	1.68931e-11	1.24954e-09	XP_014026564.1	LOC106585173	BAG family molecular chaperone regulator 4-like	protein_coding	ssa24	7037262	7045133	-	BAG4
gene46281:106584939	1.2409	2.49269	12.6075	0.000519453	0.00298864	XP_014026103.1	LOC106584939	adipocyte enhancer-binding protein 1-like	protein_coding	ssa24	7210015	7232699	+
gene46306:106585148	-1.39046	1.74068	46.1274	2.67045e-10	1.3333e-08	XP_014026511.1	LOC106585148	39S ribosomal protein L41%2C mitochondrial-like	protein_coding	ssa24	8227368	8229200	-	MRPL41
gene46332:106585128	-1.52958	4.99277	131.907	4.19174e-22	4.31254e-19	XP_014026463.1	LOC106585128	uncharacterized protein C8orf4 homolog	protein_coding	ssa24	9772504	9773652	-	C8orf4
gene46401:106585070	1.09029	1.76078	10.7595	0.00130005	0.00638385	XP_014026315.1	LOC106585070	solute carrier family 23 member 2-like	protein_coding	ssa24	13412847	13480686	+	SLC23A2
gene46409:106585064	-1.75365	0.138088	20.2353	1.39595e-05	0.00014498					ssa24	13691846	13696313	+
gene46412:106585059	1.71517	1.34238	12.0571	0.000681403	0.00374039	XP_014026294.1	LOC106585059	clathrin heavy chain 1-like	protein_coding	ssa24	13782192	13819237	-	CLTC
gene46425:106584926	-1.04719	2.83586	20.0962	1.48795e-05	0.000152806					ssa24	13976865	13985553	+
gene46444:106585038	1.01063	4.66782	81.4894	1.00641e-15	2.67339e-13	XP_014026261.1	LOC106585038	phosphatidylinositol 4-phosphate 5-kinase type-1 beta-like	protein_coding	ssa24	14425836	14515666	-	PIP5K1B
gene46518:106584971	1.5156	0.0304105	12.9012	0.000449213	0.00265101	XP_014026128.1	LOC106584971	oxysterol-binding protein 2-like	protein_coding	ssa24	16684018	16747972	+	OSBP2
gene4652:106588092	-1.16735	0.415953	13.2478	0.000379132	0.0023002	XP_014032239.1	LOC106588092	anaphase-promoting complex subunit 11	protein_coding	ssa02	45695024	45697497	-
gene46533:106585266	-1.10318	0.876913	18.1349	3.68632e-05	0.000328144	XP_014026773.1	LOC106585266	phosphatidylinositol 4%2C5-bisphosphate 5-phosphatase A-like	protein_coding	ssa24	17230820	17276999	-	INPP5J
gene46534:106585267	1.33095	5.11756	35.3207	2.02558e-08	5.66012e-07	XP_014026778.1	LOC106585267	smoothelin-like	protein_coding	ssa24	17290223	17377300	-	SMTN
gene46592:106585604	1.39091	3.56584	44.3653	5.29836e-10	2.43416e-08	XP_014027478.1	LOC106585604	beta-1 adrenergic receptor-like	protein_coding	ssa24	19547799	19562995	-	ADRB3
gene466:106583235	4.41678	-1.04846	25.3717	1.38825e-06	2.04657e-05					ssa01	22487671	22490489	-
gene46612:106585585	-1.3644	1.65299	22.86	4.244e-06	5.27795e-05	XP_014027435.1	LOC106585585	stanniocalcin-like	protein_coding	ssa24	20215970	20223750	+	STC1
gene46613:100196040	-1.76937	4.55182	49.1714	8.49159e-11	5.02261e-09	NP_001134541.1	nkx31	Homeobox protein Nkx-3.1	protein_coding	ssa24	20266587	20267844	+	NKX3-1
gene46631:106585317	-1.5085	1.6774	59.9073	1.57192e-12	1.58363e-10					ssa24	20753856	20756899	-
gene467:106583171	3.27674	4.36252	55.3643	8.74903e-12	6.92397e-10					ssa01	22492133	22495335	-
gene46737:106585466	1.36199	1.82401	20.9997	9.8442e-06	0.000107709	XP_014027168.1	LOC106585466	cytospin-A-like	protein_coding	ssa24	24704379	24728089	+
gene46754:106585453	-1.43653	0.16444	20.1094	1.47893e-05	0.000152017	XP_014027148.1	LOC106585453	serine/threonine-protein kinase N2-like	protein_coding	ssa24	24920215	24936105	+
gene4678:100194498	1.20748	3.13536	20.7714	1.09359e-05	0.000117532	NP_001133058.1	LOC100194498	insulin-like growth factor binding protein 4	protein_coding	ssa02	46152938	46165542	+	IGFBP4
gene46787:106585432	-1.00308	2.59887	30.6386	1.42036e-07	2.95501e-06	XP_014027093.1	LOC106585432	2-oxoglutarate receptor 1-like	protein_coding	ssa24	26013491	26015422	+
gene46799:106585419	-1.02216	0.0428868	12.1465	0.00065131	0.00360728					ssa24	26440864	26443664	-
gene46808:106585411	-1.18273	1.97397	22.1864	5.74761e-06	6.82059e-05	XP_014027045.1	LOC106585411	probable G-protein coupled receptor 21	protein_coding	ssa24	26651452	26657779	+	GPR21
gene4681:106587857	1.08303	1.92997	26.2267	9.53416e-07	1.48893e-05	XP_014031986.1	LOC106587857	tensin-4-like	protein_coding	ssa02	46197501	46211372	+	TNS4
gene46824:106585395	-1.05077	1.39149	21.0985	9.41142e-06	0.000103776	XP_014027022.1	LOC106585395	monocarboxylate transporter 13-like	protein_coding	ssa24	26916583	26923368	+
gene4685:106587804	-1.32578	7.16242	56.4676	5.5251e-12	4.64314e-10	XP_014031926.1	LOC106587804	keratin%2C type I cytoskeletal 13-like	protein_coding	ssa02	46320687	46326796	+
gene4690:100195545	-1.51181	6.27611	19.8304	1.70109e-05	0.000170869	XP_014029170.1	k1c20	Keratin%2C type I cytoskeletal 20	protein_coding	ssa02	46443332	46451130	-	KRT14
gene46938:106585697	-1.33832	-0.353397	11.1678	0.00105943	0.00539663	XP_014027679.1	LOC106585697	Rieske domain-containing protein-like	protein_coding	ssa24	30565287	30581508	-	RFESD
gene47:106579027	1.57066	1.66787	19.1524	2.29815e-05	0.00022016	XP_014014289.1	LOC106579027	protein numb homolog	protein_coding	ssa01	2194919	2207834	+	NUMB
gene47002:106585786	1.61235	-0.18452	12.8299	0.000465196	0.00272449	XP_014027876.1	LOC106585786	disabled homolog 2-interacting protein-like	protein_coding	ssa24	32467056	32598727	-	DAB2IP
gene4704:106587593	1.16308	5.87671	41.2892	1.79898e-09	6.97226e-08	XP_014031620.1	LOC106587593	neuroblast differentiation-associated protein AHNAK-like	protein_coding	ssa02	46715218	46725298	+
gene47086:106585838	1.9719	1.59532	24.3732	2.16168e-06	2.96411e-05	XP_014027985.1	ccser1	coiled-coil serine-rich protein 1	protein_coding	ssa24	39257297	39376422	-	CCSER1
gene47111:106585855	1.43625	0.599974	20.0154	1.54417e-05	0.000157625	XP_014028031.1	LOC106585855	transducin-like enhancer protein 1	protein_coding	ssa24	40195756	40199738	+
gene47130:106585882	-1.19023	5.12845	11.2877	0.0010021	0.00515019	XP_014028076.1	LOC106585882	C-C motif chemokine 4-like	protein_coding	ssa24	40988887	40991235	+	CCL19
gene4714:106587516	1.56228	7.0766	76.2515	5.69225e-15	1.1784e-12	XP_014031453.1	LOC106587516	hexokinase-1-like	protein_coding	ssa02	46850090	46865095	+	HK1
gene47145:106585900	1.16056	2.72192	12.698	0.000496842	0.00287854	XP_014028105.1	ddr1	discoidin domain receptor tyrosine kinase 1	protein_coding	ssa24	41550264	41605169	-
gene47146:106585901	2.01289	4.64909	78.2098	3.04338e-15	6.84277e-13	XP_014028110.1	LOC106585901	uncharacterized LOC106585901	protein_coding	ssa24	41617406	41618777	-	IER3
gene47147:106585888	2.91248	0.386636	58.6673	2.45753e-12	2.2936e-10	XP_014028082.1	ier3	immediate early response 3	protein_coding	ssa24	41635182	41636455	-
gene47164:106585919	1.01242	4.40779	74.0734	1.15624e-14	2.1688e-12	XP_014028135.1	LOC106585919	LMBR1 domain-containing protein 2-B-like	protein_coding	ssa24	42816810	42833447	+	LMBRD2
gene47169:106585921	1.24771	3.25536	13.29	0.00037247	0.00226626	XP_014028139.1	LOC106585921	nipped-B-like protein A	protein_coding	ssa24	43051028	43066486	+
gene47216:106585967	-1.34511	3.74312	58.4059	2.70125e-12	2.47197e-10					ssa24	46340552	46341736	+
gene47264:106586018	1.40863	3.9041	21.9002	6.5918e-06	7.6801e-05	XP_014028274.1	LOC106586018	P2Y purinoceptor 8-like	protein_coding	ssa25	67954	117527	+
gene47278:106586030	-1.01619	1.27589	16.0119	0.000100144	0.000756896	XP_014028299.1	LOC106586030	guanine nucleotide-binding protein G(I)/G(S)/G(O) subunit gamma-13-like	protein_coding	ssa25	1112039	1124949	+	GNG13
gene47279:106586032	-1.22101	-0.142992	9.99053	0.00191693	0.00876168	XP_014028302.1	LOC106586032	guanine nucleotide-binding protein G(I)/G(S)/G(O) subunit gamma-13-like	protein_coding	ssa25	1122432	1129987	+	GNG13
gene47303:106586055	-1.37083	1.70184	36.4914	1.23573e-08	3.73257e-07	XP_014028351.1	LOC106586055	microtubule-associated tumor suppressor 1 homolog A-like	protein_coding	ssa25	4251940	4253579	-	MTUS1
gene4735:106587379	1.05246	3.51823	25.4203	1.35882e-06	2.01192e-05	XP_014031210.1	LOC106587379	zinc finger protein Gfi-1b-like	protein_coding	ssa02	47283152	47303094	-
gene47365:106586136	-1.04384	1.40114	19.6701	1.80982e-05	0.000180456	XP_014028503.1	LOC106586136	probable inactive tRNA-specific adenosine deaminase-like protein 3	protein_coding	ssa25	10067240	10068843	-	ADAT3
gene47375:100306754	1.0873	5.04287	23.0498	3.9231e-06	4.93308e-05	NP_001158765.1	cxcr4	C-X-C chemokine receptor type 4	protein_coding	ssa25	10347591	10349559	+	CXCR4
gene47388:106586155	-1.48233	2.38997	48.6118	1.02811e-10	5.81753e-09	XP_014028534.1	LOC106586155	protein FEV-like	protein_coding	ssa25	10877959	10881957	-	FEV
gene47395:106586162	1.20462	2.92284	17.2385	5.61394e-05	0.000466354	XP_014028552.1	LOC106586162	formin-like protein 2	protein_coding	ssa25	11306385	11382043	+	FMNL2
gene4742:100196059	-1.23561	2.66308	64.6561	2.9142e-13	3.54623e-11	XP_014031060.1	LOC100196059	U3 small nucleolar RNA-associated protein 6 homolog	protein_coding	ssa02	47527580	47542070	-	UTP6
gene47425:106586196	-1.0832	0.456148	12.3609	0.00058587	0.0033003	XP_014028664.1	LOC106586196	sodium channel protein type 2 subunit alpha-like	protein_coding	ssa25	13346793	13401121	+	SCN2A
gene47436:106586206	-1.63377	0.0537569	20.8954	1.03236e-05	0.000112047	XP_014028697.1	LOC106586206	low-density lipoprotein receptor-related protein 2-like	protein_coding	ssa25	13791045	13855392	-	LRP2
gene47438:106586209	1.62346	3.1647	16.4837	8.05215e-05	0.000632159	XP_014028703.1	LOC106586209	kelch-like protein 41b	protein_coding	ssa25	13929081	13931870	+	KLHL41
gene4746:106587269	-1.51606	0.570501	27.4062	5.69834e-07	9.59645e-06					ssa02	47562259	47564731	-
gene47464:106586236	-1.38955	4.2837	62.7007	5.80463e-13	6.48266e-11	XP_014028763.1	LOC106586236	cell division cycle-associated protein 7-like	protein_coding	ssa25	14614696	14618277	+	CDCA7
gene47489:106586248	-1.4292	2.01871	35.6598	1.73865e-08	4.95625e-07					ssa25	15233047	15235117	+
gene47521:106586273	-2.03106	1.94588	24.6062	1.94735e-06	2.72188e-05	XP_014028871.1	LOC106586273	pyridoxal kinase-like	protein_coding	ssa25	16370986	16381074	+	PDXK
gene47528:100136407	1.00182	6.24346	17.4339	5.14725e-05	0.000432534	NP_001117028.1	ahr2b	aryl hydrocarbon receptor 2 beta	protein_coding	ssa25	16616439	16664003	-
gene47554:106586316	-1.04527	1.54025	19.8584	1.65963e-05	0.000167249	XP_014028960.1	LOC106586316	rho-related GTP-binding protein RhoE	protein_coding	ssa25	18731720	18750147	-	RND3
gene47588:106586343	2.75108	2.52022	47.2993	1.72913e-10	9.12996e-09	XP_014029003.1	LOC106586343	inactive phospholipase C-like protein 1	protein_coding	ssa25	20581582	20612720	+
gene47598:106586352	2.76497	0.806431	29.2401	2.58665e-07	4.95874e-06	XP_014029024.1	LOC106586352	inactive phospholipase C-like protein 1	protein_coding	ssa25	20844809	20915807	-
gene47627:106586387	1.67005	0.842091	18.4657	3.15996e-05	0.000288242	XP_014029078.1	LOC106586387	diacylglycerol kinase beta-like	protein_coding	ssa25	21340230	21498982	+	DGKB
gene4766:106587099	1.00029	4.08246	40.6276	2.31976e-09	8.64525e-08	XP_014030568.1	LOC106587099	ubiquitin carboxyl-terminal hydrolase 43-like	protein_coding	ssa02	48154539	48280906	-	USP43
gene47661:106586432	2.18899	2.46205	49.4603	7.46565e-11	4.48687e-09	XP_014029179.1	LOC106586432	leucine-zipper-like transcriptional regulator 1	protein_coding	ssa25	23246143	23251587	-
gene47677:106586446	1.19181	1.54418	11.376	0.000954835	0.0049485	XP_014029214.1	LOC106586446	receptor tyrosine-protein kinase erbB-4-like	protein_coding	ssa25	24951860	25417386	+	ERBB4
gene47804:106586587	-1.0223	3.03785	36.3061	1.33321e-08	3.97184e-07	XP_014029500.1	sctr	secretin receptor	protein_coding	ssa25	30860930	30866169	-
gene47816:106586596	1.04832	3.00315	12.3928	0.000577247	0.003262	XP_014029521.1	LOC106586596	serine/threonine-protein kinase LATS2-like	protein_coding	ssa25	31142325	31164354	-	LATS2
gene47822:106586600	1.26958	0.656151	18.5395	3.05334e-05	0.000279719	XP_014029529.1	LOC106586600	3 beta-hydroxysteroid dehydrogenase/Delta 5-->4-isomerase-like	protein_coding	ssa25	31222404	31224964	-	HSD3B1
gene4785:106586893	-1.54013	3.12126	60.9949	1.06475e-12	1.11572e-10	XP_014030102.1	LOC106586893	C-X-C motif chemokine 11-like	protein_coding	ssa02	48865613	48867386	+
gene47866:106586629	2.36047	3.30036	41.4513	1.71121e-09	6.70096e-08	XP_014029594.1	LOC106586629	sodium/myo-inositol cotransporter-like	protein_coding	ssa25	33173429	33184395	-	SLC5A3
gene47876:106586638	1.89453	-0.664661	14.7644	0.000181809	0.00124956	XP_014029617.1	LOC106586638	gap junction alpha-5 protein-like	protein_coding	ssa25	33469375	33489510	-
gene47914:106586666	1.21577	5.00701	10.3548	0.00160011	0.00756303	XP_014029658.1	LOC106586666	collagen alpha-1(IV) chain-like	protein_coding	ssa25	35363466	35410287	-	COL4A1
gene4797:106586766	-1.12078	0.914608	18.2845	3.43791e-05	0.000309357	XP_014029851.1	LOC106586766	CST complex subunit STN1-like	protein_coding	ssa02	50766200	50769685	-	OBFC1
gene47988:106586777	1.65511	6.05501	134.36	2.20311e-22	2.41284e-19	XP_014029866.1	LOC106586777	sodium/hydrogen exchanger 2-like	protein_coding	ssa25	38924043	38949103	+	SLC9A2
gene48102:106586860	1.27579	2.40704	14.322	0.00022521	0.00148702	XP_014030059.1	LOC106586860	uncharacterized protein C21orf62-like	protein_coding	ssa25	44923488	44929306	-	C21orf62
gene48117:106586894	-1.04051	3.35477	55.0962	9.0452e-12	7.14171e-10	XP_014030101.1	LOC106586894	testis-expressed sequence 30 protein-like	protein_coding	ssa25	46763559	46766508	-	TEX30
gene48144:106586904	1.35188	1.699	17.1797	5.76585e-05	0.000476757	XP_014030121.1	LOC106586904	FTS and Hook-interacting protein homolog	protein_coding	ssa25	48324968	48380537	+	FAM160A2
gene48247:106587027	1.23964	1.94457	12.2292	0.00062543	0.00348612	XP_014030349.1	LOC106587027	chromaffin granule amine transporter-like	protein_coding	ssa26	2402042	2410031	+	SLC18A1
gene48269:106587046	1.08887	2.55964	10.2322	0.00169721	0.00793911	XP_014030393.1	LOC106587046	rho guanine nucleotide exchange factor 28-like	protein_coding	ssa26	3286478	3373890	-	ARHGEF28
gene48298:106587068	1.46953	0.0840243	11.5191	0.000889104	0.00466697	XP_014030447.1	LOC106587068	USP6 N-terminal-like protein	protein_coding	ssa26	6838726	6876609	-	USP6NL
gene48299:106587065	1.61099	1.38669	31.656	9.22927e-08	2.02418e-06	XP_014030437.1	LOC106587065	glycosyltransferase-like protein LARGE2	protein_coding	ssa26	7085352	7199576	+	LARGE
gene48311:106587079	-1.09239	2.60791	18.8264	2.67256e-05	0.000249962					ssa26	8239732	8266702	+
gene48317:106587085	-1.71106	1.03748	36.2681	1.35416e-08	4.00605e-07	XP_014030501.1	LOC106587085	transmembrane protein 138	protein_coding	ssa26	8519991	8533223	-
gene48323:106587091	1.08777	3.66977	23.6059	3.0426e-06	3.98224e-05	XP_014030522.1	LOC106587091	gamma-butyrobetaine dioxygenase-like	protein_coding	ssa26	8780254	8808202	-
gene48378:106587142	-1.05774	0.560708	14.3562	0.000221332	0.00146595	XP_014030673.1	LOC106587142	G-protein coupled receptor 64-like	protein_coding	ssa26	10543912	10547848	+
gene48407:100286718	-1.58426	2.26586	71.3975	2.84959e-14	4.78942e-12	NP_001140130.1	ccne1	cyclin E1	protein_coding	ssa26	12760550	12765331	-
gene48409:106587164	-1.34633	0.483272	17.2578	5.55801e-05	0.00046216					ssa26	12765780	12768770	+
gene48456:106587264	-1.15711	2.8238	43.552	7.28608e-10	3.20843e-08	XP_014030978.1	LOC106587264	DNA replication factor Cdt1-like	protein_coding	ssa26	15333627	15340032	+	CDT1
gene48461:106587162	1.05337	3.02707	14.7658	0.000181816	0.00124956	XP_014030717.1	LOC106587162	protein CBFA2T3-like	protein_coding	ssa26	15376115	15426903	-
gene48501:106587226	-1.62925	4.04909	38.221	6.18956e-09	2.01697e-07	XP_014030878.1	LOC106587226	uncharacterized LOC106587226	protein_coding	ssa26	17447279	17453389	+
gene48502:106587222	-1.33176	2.35765	11.2436	0.00102147	0.00523391	XP_014030870.1	LOC106587222	neuronal acetylcholine receptor subunit alpha-5-like	protein_coding	ssa26	17481086	17505672	+
gene48503:106587223	-1.58892	1.93071	11.1834	0.0010529	0.0053683	XP_014030874.1	LOC106587223	immunoglobulin superfamily member 1-like	protein_coding	ssa26	17483304	17487336	+
gene48537:106587193	1.24213	4.29835	52.7726	2.14009e-11	1.54592e-09	XP_014030772.1	LOC106587193	protein-methionine sulfoxide oxidase MICAL2-like	protein_coding	ssa26	18924679	18970560	-	MICAL2
gene48542:106587189	-1.89234	1.54334	77.9923	3.14922e-15	6.98818e-13	XP_014030760.1	LOC106587189	bolA-like protein 3	protein_coding	ssa26	19046975	19051174	-	BOLA3
gene48544:101448035	1.74609	0.673941	32.7507	5.82247e-08	1.37182e-06	NP_001266003.1	LOC101448035	beta-carotene 15%2C15'-monooxygenase 1 like	protein_coding	ssa26	19081507	19085946	-	BCO1
gene48548:106587185	2.03444	4.23672	36.8585	1.08955e-08	3.35674e-07	XP_014030750.1	LOC106587185	nuclear factor of activated T-cells 5-like	protein_coding	ssa26	19149969	19200572	+	NFAT5
gene4859:100196535	-1.16314	1.85122	34.4303	2.8899e-08	7.65983e-07	NP_001135036.1	cp063	LisH domain-containing protein C16orf63 homolog	protein_coding	ssa02	52749245	52750574	+	FOPNL
gene48602:106587436	-1.71588	0.240781	28.1646	4.10205e-07	7.27631e-06	XP_014031305.1	LOC106587436	meiosis-specific nuclear structural protein 1-like	protein_coding	ssa26	21810637	21816064	+	MNS1
gene48628:100195455	-1.06853	2.41164	53.6978	1.51686e-11	1.13434e-09	NP_001133956.1	tha11	THAP domain-containing protein 11	protein_coding	ssa26	22231162	22232893	+	THAP11
gene48634:106587407	1.70072	2.90445	29.4994	2.32059e-07	4.5124e-06					ssa26	22279385	22287382	+
gene48638:106587403	-1.24036	-0.300449	9.71028	0.00221055	0.00981052	XP_014031234.1	LOC106587403	putative sodium-coupled neutral amino acid transporter 7	protein_coding	ssa26	22353685	22363723	+
gene4865:106589006	1.46581	1.11244	16.1105	9.55608e-05	0.000727604	XP_014034104.1	LOC106589006	RNA binding protein fox-1 homolog 2-like	protein_coding	ssa02	52819002	52838908	+
gene48668:106587378	-1.28391	1.99318	20.1393	1.45881e-05	0.000150404	XP_014031204.1	gas8	growth arrest-specific 8	protein_coding	ssa26	23070230	23079441	+	GAS8
gene48669:106587376	-1.08156	0.649104	11.9506	0.000717594	0.00390061	XP_014031201.1	LOC106587376	carboxylesterase 3-like	protein_coding	ssa26	23086935	23096898	+
gene48674:106587372	-1.76589	0.187586	23.4227	3.29815e-06	4.25277e-05					ssa26	23212363	23221438	+
gene48700:106587461	1.5126	0.956864	14.0633	0.000255014	0.00165691	XP_014031344.1	LOC106587461	spondin-1-like	protein_coding	ssa26	24700731	24841401	-	SPON1
gene48768:106587537	-1.45049	2.48447	76.8134	4.64547e-15	9.87102e-13	XP_014031480.1	LOC106587537	protein RIC-3-like	protein_coding	ssa26	27727856	27732730	-	RIC3
gene48772:106587519	1.01784	3.46963	13.6596	0.000310727	0.00194856	XP_014031459.1	LOC106587519	tripartite motif-containing protein 66-like	protein_coding	ssa26	27976718	27988630	-	TRIM66
gene48784:100136916	2.74279	8.38233	152.819	2.27468e-24	4.29042e-21	NP_001117159.1	cyp1a	cytochrome P450 1A	protein_coding	ssa26	28328216	28332256	+
gene48800:106587522	1.30634	0.0424584	10.4537	0.00151646	0.00722405	XP_014031461.1	LOC106587522	putative protein FAM47C	protein_coding	ssa26	28927327	28951627	+
gene48806:106587570	1.50462	2.65003	14.542	0.000202915	0.00137098	XP_014031562.1	LOC106587570	Wilms tumor protein 1-interacting protein homolog	protein_coding	ssa26	29151540	29183048	-
gene48808:106587573	1.71713	-0.0746124	19.9809	1.5688e-05	0.000159755	XP_014031565.1	LOC106587573	arylamine N-acetyltransferase%2C pineal gland isozyme NAT-10-like	protein_coding	ssa26	29189290	29190738	+	NAT1
gene48825:106587586	1.10405	3.21145	18.2218	3.5432e-05	0.000317318	XP_014031587.1	chd9	chromodomain helicase DNA binding protein 9	protein_coding	ssa26	30061133	30178479	+	CHD9
gene48838:106587604	1.03951	3.50855	17.9711	3.98323e-05	0.000349444	XP_014031639.1	LOC106587604	solute carrier family 12 member 4-like	protein_coding	ssa26	31353927	31375831	+	SLC12A4
gene48856:106587624	1.88909	1.65249	33.4944	4.26577e-08	1.06101e-06	XP_014031666.1	LOC106587624	nuclear factor of activated T-cells%2C cytoplasmic 3-like	protein_coding	ssa26	31913745	31991177	+	NFATC3
gene48953:106587719	2.26426	-0.732781	13.5279	0.000330728	0.00204975	XP_014031794.1	LOC106587719	alpha-protein kinase 3-like	protein_coding	ssa26	34513313	34529132	-	ALPK3
gene48968:106587736	1.44941	2.43989	18.576	3.00583e-05	0.000275888	XP_014031818.1	LOC106587736	mitogen-activated protein kinase 6-like	protein_coding	ssa26	35059079	35073370	-	MAPK6
gene48969:106587738	2.10129	0.456005	30.8854	1.27901e-07	2.69379e-06	XP_014031819.1	LOC106587738	glycine amidinotransferase%2C mitochondrial-like	protein_coding	ssa26	35076333	35085414	+	GATM
gene48971:106587740	1.39743	-0.293658	10.1049	0.00180895	0.00835358	XP_014031830.1	LOC106587740	uncharacterized protein C2orf16-like	protein_coding	ssa26	35155428	35157452	+
gene49026:106587797	1.59614	0.00277204	11.0657	0.00111492	0.00562783					ssa26	37339184	37355150	-
gene4904:106589325	1.96362	2.25995	57.1729	4.22699e-12	3.6424e-10					ssa02	53580233	53582610	-
gene49051:106587822	1.01511	3.95089	10.699	0.00134345	0.00656114	XP_014031941.1	LOC106587822	ceramide synthase 2-like	protein_coding	ssa26	38078274	38089656	-
gene49074:106587849	-1.10538	4.02059	43.2796	8.10948e-10	3.50286e-08	XP_014031975.1	LOC106587849	major histocompatibility complex class I-related gene protein-like	protein_coding	ssa26	38686631	38689188	+
gene4910:106589359	1.52078	0.0902184	23.3461	3.41313e-06	4.38272e-05	XP_014034696.1	LOC106589359	prostaglandin E2 receptor EP1 subtype-like	protein_coding	ssa02	53769886	53775990	-
gene49123:106587897	1.59232	-0.115148	11.1884	0.00104859	0.00535266	XP_014032030.1	LOC106587897	uveal autoantigen with coiled-coil domains and ankyrin repeats-like	protein_coding	ssa26	40761921	40772953	-	UACA
gene49216:106587994	1.1297	1.43939	15.4633	0.00013006	0.000941731	XP_014032130.1	LOC106587994	uncharacterized LOC106587994	protein_coding	ssa26	42621340	42629988	-
gene49223:106588001	2.01056	2.37306	23.0815	3.86281e-06	4.87198e-05					ssa26	42934102	42935068	+
gene49260:106588037	1.48429	1.28681	19.289	2.15752e-05	0.000208987	XP_014032177.1	LOC106588037	titin-like	protein_coding	ssa26	44847129	44855185	-	TTN
gene49274:106588049	1.72626	-0.760666	10.6942	0.0013434	0.00656114	XP_014032188.1	LOC106588049	asc-type amino acid transporter 1-like	protein_coding	ssa26	45249504	45273894	-
gene4931:106589539	1.10617	1.32225	19.2063	2.24165e-05	0.000215598	XP_014035127.1	LOC106589539	nuclear factor interleukin-3-regulated protein-like	protein_coding	ssa02	54440786	54443321	-
gene49605:106588140	1.24855	2.04979	21.8937	6.56047e-06	7.64623e-05	XP_014032307.1	LOC106588140	aquaporin-3-like	protein_coding	ssa27	247696	251986	-
gene49609:106588165	-1.0095	1.62303	22.2981	5.46504e-06	6.53093e-05	XP_014032350.1	cssa27h1orf43	chromosome ssa27 open reading frame%2C human C1orf43	protein_coding	ssa27	366419	369163	+	C1orf43
gene49610:106588166	1.20576	0.991422	11.1085	0.00109134	0.00553266	XP_014032351.1	LOC106588166	tuftelin-like	protein_coding	ssa27	376769	411578	-
gene49617:106588171	-1.1915	0.729735	16.3493	8.53257e-05	0.000662147	XP_014032368.1	LOC106588171	ephrin-A3-like	protein_coding	ssa27	795324	897669	+	EFNA3
gene49650:106588200	1.14502	3.41626	14.1863	0.000240861	0.00157623	XP_014032430.1	LOC106588200	RNA-binding motif%2C single-stranded-interacting protein 3-like	protein_coding	ssa27	2452066	2701774	+	RBMS3
gene49669:106588215	-1.47998	-0.584413	10.4419	0.00152551	0.00725997	XP_014032463.1	LOC106588215	sperm acrosome membrane-associated protein 4-like	protein_coding	ssa27	3419123	3422514	-
gene497:106589077	1.24421	5.37196	59.3828	1.9038e-12	1.85736e-10	XP_014034266.1	LOC106589077	delta-like protein 4	protein_coding	ssa01	23882677	23889606	-	DLL4
gene49703:100380831	1.38793	3.94852	17.702	4.54178e-05	0.000389881	XP_014032303.1	i2c3	Eukaryotic translation initiation factor 2C 3	protein_coding	ssa27	5066299	5117841	-	AGO3
gene49756:106588266	-1.25098	0.573093	16.7434	7.08161e-05	0.000567716					ssa27	7544079	7553783	+
gene49789:106588456	1.1475	0.921243	12.2649	0.000614298	0.00343592	XP_014032963.1	LOC106588456	C3a anaphylatoxin chemotactic receptor-like	protein_coding	ssa27	8432586	8437948	-
gene4980:106590030	1.22103	4.71508	31.1967	1.13038e-07	2.42362e-06	XP_014035998.1	LOC106590030	heme oxygenase-like	protein_coding	ssa02	55729594	55733308	-	HMOX1
gene49803:106588444	1.87715	-0.494657	19.7114	1.77575e-05	0.000177319	XP_014032928.1	LOC106588444	voltage-dependent calcium channel gamma-7 subunit-like	protein_coding	ssa27	8767195	8811365	+	CACNG7
gene49811:106588436	-1.27951	0.203182	12.4651	0.000556554	0.00316403	XP_014032905.1	LOC106588436	chloride channel protein 1-like	protein_coding	ssa27	8953964	8986326	+	CLCN1
gene49816:106588429	-1.32115	1.31019	30.1971	1.71413e-07	3.46407e-06	XP_014032884.1	LOC106588429	intermediate filament family orphan 1-like	protein_coding	ssa27	9089571	9101085	+	IFFO1
gene4982:106589832	1.57654	3.36345	38.8495	4.75528e-09	1.61285e-07	XP_014035695.1	LOC106589832	plectin-like	protein_coding	ssa02	55740441	55746953	+
gene49891:106588285	-1.79988	-0.414718	14.4093	0.000215732	0.00143783	XP_014032596.1	LOC106588285	secretagogin-like	protein_coding	ssa27	11058252	11066077	+	SCGN
gene49966:106588301	1.25543	6.06689	23.539	3.16619e-06	4.11072e-05	XP_014032611.1	LOC106588301	uncharacterized LOC106588301	protein_coding	ssa27	13030443	13035268	-
gene49978:106588523	6.61942	-1.68711	36.3956	4.1031e-08	1.02883e-06	XP_014033113.1	LOC106588523	integumentary mucin C.1-like	protein_coding	ssa27	13958065	13959011	-
gene49979:106588522	6.9648	-1.5179	42.2909	5.03404e-09	1.69386e-07	XP_014033112.1	LOC106588522	mucin-2-like	protein_coding	ssa27	13960290	13978734	-
gene5000:106590145	-1.04762	0.98947	23.0168	3.95567e-06	4.96852e-05	XP_014036261.1	LOC106590145	BBSome-interacting protein 1-like	protein_coding	ssa02	56266866	56268531	+
gene5011:106590303	-4.03591	1.84583	12.995	0.000432175	0.00256394	XP_014036639.1	LOC106590303	trypsin-3-like	protein_coding	ssa02	56868745	56871573	-
gene5013:106590308	1.6519	1.93033	27.2837	6.01003e-07	1.00615e-05	XP_014036663.1	LOC106590308	GTPase IMAP family member 2-like	protein_coding	ssa02	56885828	56886664	+
gene5014:106590316	1.4382	4.99262	58.1799	2.96474e-12	2.66286e-10	XP_014036675.1	LOC106590316	uncharacterized LOC106590316	protein_coding	ssa02	56887799	56890392	+
gene5016:106590330	1.16832	4.55018	37.7288	7.48317e-09	2.39229e-07	XP_014036693.1	LOC106590330	heme oxygenase-like	protein_coding	ssa02	56912576	56916329	+	HMOX1
gene50190:106588616	1.3309	2.67543	42.2091	1.23703e-09	5.03576e-08	XP_014033253.1	LOC106588616	membrane progestin receptor alpha-B-like	protein_coding	ssa27	17636788	17642004	-
gene50210:106588640	-1.85818	4.2249	134.222	2.28437e-22	2.42365e-19	XP_014033292.1	LOC106588640	endothelin-2-like	protein_coding	ssa27	18488459	18492241	-	EDN2
gene50214:106588645	-1.37217	-0.347456	12.2392	0.000622129	0.00347228	XP_014033301.1	LOC106588645	cAMP-dependent protein kinase inhibitor beta-like	protein_coding	ssa27	18568620	18612782	+	PKIB
gene50244:106588668	1.07835	3.37135	37.3459	8.71656e-09	2.73761e-07	XP_014033352.1	LOC106588668	nuclear receptor subfamily 1 group D member 2-like	protein_coding	ssa27	19843066	19851853	+	NR1D2
gene50277:100136468	-1.40308	8.03905	34.1556	3.28925e-08	8.48581e-07	XP_014033406.1	agr2	anterior gradient homolog 2 (Xenopus laevis)	protein_coding	ssa27	21509623	21512489	-
gene50294:106588690	2.09043	1.34949	23.0466	3.90861e-06	4.91851e-05	XP_014033412.1	LOC106588690	triple functional domain protein-like	protein_coding	ssa27	22169036	22236032	+	TRIO
gene50299:106588786	1.07025	4.48058	35.1011	2.19175e-08	6.06001e-07	XP_014033674.1	LOC106588786	triple functional domain protein-like	protein_coding	ssa27	22380625	22412844	+	TRIO
gene50303:106588784	2.27335	3.92638	81.9021	9.0746e-16	2.46473e-13	XP_014033670.1	snrk	SNF related kinase	protein_coding	ssa27	22574768	22587676	+	SNRK
gene50334:106588747	1.31724	0.898893	11.1538	0.00106685	0.00542956	XP_014033558.1	LOC106588747	cAMP-regulated phosphoprotein 21-like	protein_coding	ssa27	23317044	23327936	-
gene50335:106588745	1.31007	3.84405	9.72846	0.0021967	0.00976657	XP_014033546.1	pdcd6ip	programmed cell death 6 interacting protein	protein_coding	ssa27	23351133	23372912	-	PDCD6IP
gene50336:106588748	1.28571	2.37073	13.8753	0.000279619	0.00178985	XP_014033561.1	LOC106588748	upstream-binding protein 1-like	protein_coding	ssa27	23379246	23393414	-	UBP1
gene50490:106588918	-1.12133	3.46116	59.7661	1.65375e-12	1.65624e-10	XP_014033940.1	LOC106588918	GATA zinc finger domain-containing protein 1-like	protein_coding	ssa27	29633922	29636594	-	GATAD1
gene50493:100196086	1.75245	-0.396739	9.91935	0.00198749	0.0090162	NP_001134587.1	i2c2	Eukaryotic translation initiation factor 2C 2	protein_coding	ssa27	29663759	29668226	-	AGO2
gene50522:106588952	-1.0673	1.09619	13.5015	0.000335018	0.00207262					ssa27	31061976	31063781	+
gene50536:106588975	-2.70193	-0.183497	24.1337	2.40195e-06	3.26195e-05					ssa27	32190615	32192528	-
gene5057:106590657	1.84435	0.658722	13.7543	0.000296342	0.00188164	XP_014037277.1	LOC106590657	nucleus accumbens-associated protein 1-like	protein_coding	ssa02	57995608	58009282	-
gene50592:106589020	1.44799	3.66517	67.0384	1.27021e-13	1.71131e-11	XP_014034134.1	LOC106589020	ribonuclease ZC3H12A-like	protein_coding	ssa27	35497908	35513414	+	ZC3H12A
gene50603:106589038	-1.05568	1.56623	10.0741	0.00183739	0.00846421	XP_014034165.1	LOC106589038	unconventional myosin-Ig-like	protein_coding	ssa27	36108530	36186068	-	MYO1D
gene50604:106589037	1.59798	0.167036	19.2515	2.19522e-05	0.000211973	XP_014034164.1	LOC106589037	serine/threonine-protein kinase Sgk1-like	protein_coding	ssa27	36320082	36330910	+
gene50696:106589124	1.85491	2.19661	51.8797	2.98814e-11	2.062e-09	XP_014034297.1	LOC106589124	tribbles homolog 1-like	protein_coding	ssa27	41206513	41224430	-	TRIB1
gene50699:106589129	1.71384	1.48119	13.8007	0.000290018	0.00184735	XP_014034301.1	LOC106589129	protein spire homolog 1-like	protein_coding	ssa27	41269244	41372651	-	SPIRE1
gene5070:106590815	-1.00595	0.356761	11.0584	0.00111902	0.00564349	XP_014037449.1	LOC106590815	zinc finger and SCAN domain-containing protein 21-like	protein_coding	ssa02	58594224	58597657	+
gene50703:106589131	4.16064	-0.838116	30.151	1.74814e-07	3.52023e-06					ssa27	41418598	41419867	+
gene50811:106589322	-1.44565	0.394447	25.3967	1.37301e-06	2.02939e-05	XP_014034604.1	LOC106589322	delta-1-pyrroline-5-carboxylate synthase-like	protein_coding	ssa28	2858489	2868576	+
gene50825:106589334	-1.45783	3.47463	11.1984	0.00104718	0.0053463	XP_014034653.1	LOC106589334	dexamethasone-induced Ras-related protein 1-like	protein_coding	ssa28	3694076	3695895	+	RASD1
gene50834:106589341	1.52349	4.75759	151.192	3.09511e-24	5.53064e-21					ssa28	4036670	4110035	+
gene50835:106589342	-1.08178	5.43973	27.8702	4.69411e-07	8.16862e-06	XP_014034661.1	LOC106589342	transcription factor Sox-9-A-like	protein_coding	ssa28	4178291	4182264	-	SOX9
gene50908:106589397	1.24776	1.72589	31.2152	1.11209e-07	2.39118e-06	XP_014034784.1	LOC106589397	cGMP-dependent protein kinase 1	protein_coding	ssa28	7163590	7329428	+	PRKG1
gene5092:106590913	-1.06511	2.07645	39.8281	3.19495e-09	1.13941e-07					ssa02	59385097	59428823	-
gene50929:106589414	1.32943	2.18076	21.8275	6.75993e-06	7.82563e-05	XP_014034859.1	LOC106589414	inactive ubiquitin carboxyl-terminal hydrolase 54-like	protein_coding	ssa28	8221021	8251892	+
gene50932:106589418	1.67988	7.86741	30.992	1.24684e-07	2.63419e-06					ssa28	8307866	8309441	+
gene50945:106589434	-1.18819	3.57081	78.5357	2.63449e-15	6.12627e-13	XP_014034893.1	LOC106589434	uncharacterized LOC106589434	protein_coding	ssa28	8662849	8668321	+
gene50947:106589435	-1.23059	1.27292	22.6752	4.61162e-06	5.6564e-05	XP_014034895.1	LOC106589435	chymotrypsin-like elastase family member 2A	protein_coding	ssa28	8693040	8700180	+
gene5095:106590997	-1.19773	0.768177	16.4078	8.29935e-05	0.000647361	XP_014037647.1	LOC106590997	zinc finger protein 664-like	protein_coding	ssa02	59491023	59500864	+
gene50986:106589469	-1.00243	1.50791	22.6954	4.56989e-06	5.61129e-05	XP_014034972.1	LOC106589469	uncharacterized LOC106589469	protein_coding	ssa28	11297976	11302985	-
gene50992:106589473	-1.44586	1.72639	47.7523	1.42823e-10	7.7708e-09	XP_014034977.1	LOC106589473	uncharacterized LOC106589473	protein_coding	ssa28	11386996	11419018	-
gene5100:106590923	-1.4483	-0.150635	22.1675	5.79685e-06	6.87182e-05	XP_014037572.1	LOC106590923	3-mercaptopyruvate sulfurtransferase-like	protein_coding	ssa02	59584614	59588048	+	TST
gene51060:106589531	1.08533	3.86882	15.5778	0.000123508	0.000902158	XP_014035105.1	LOC106589531	thyrotroph embryonic factor-like	protein_coding	ssa28	13816941	13835090	+	TEF
gene51095:106589556	1.72509	-0.385575	10.8427	0.00124683	0.00616713	XP_014035156.1	LOC106589556	hemoglobin subunit beta-2-like	protein_coding	ssa28	14853984	14854815	+	HBE1
gene51140:100286546	-1.55094	2.69169	13.2887	0.000372811	0.00226712	NP_001139957.1	crym	crystallin%2C mu	protein_coding	ssa28	15776434	15782352	-	CRYM
gene5120:100196307	-1.42688	-0.289867	10.1118	0.00180261	0.00833012	NP_001134808.1	p5cr2	Pyrroline-5-carboxylate reductase 2	protein_coding	ssa02	60058770	60063561	-
gene51222:100195417	1.22954	1.82914	24.6006	1.95219e-06	2.7264e-05	NP_001133918.1	agt	angiotensinogen (serpin peptidase inhibitor%2C clade A%2C member 8)	protein_coding	ssa28	19661627	19667019	-	AGT
gene51229:106589668	1.11807	4.4402	40.4381	2.50223e-09	9.22254e-08	XP_014035395.1	LOC106589668	mitogen-activated protein kinase kinase kinase MLK4-like	protein_coding	ssa28	20001539	20018022	+
gene51243:106589685	-1.01332	2.41599	11.425	0.000931764	0.00484743	XP_014035421.1	LOC106589685	cytochrome c oxidase protein 20 homolog	protein_coding	ssa28	20293760	20297399	-	COX20
gene51256:100380841	1.56405	-0.592922	13.6578	0.000310475	0.00194733	NP_001167434.1	slc3a1	solute carrier family 3 (amino acid transporter heavy chain)%2C member 1	protein_coding	ssa28	20977744	20986792	+	SLC3A1
gene51391:100195858	-2.17517	0.677974	16.2609	8.90075e-05	0.000684461	XP_014035594.1	pbld2	Phenazine biosynthesis-like domain-containing protein 2	protein_coding	ssa28	28419303	28424555	+	PBLD
gene51400:106589842	-1.19773	2.07578	18.8575	2.63431e-05	0.000246792					ssa28	28825193	28830658	-
gene51561:106590007	1.78213	-0.256137	12.0506	0.000682923	0.0037457	XP_014035962.1	LOC106590007	disrupted in schizophrenia 1 protein-like	protein_coding	ssa28	39307510	39332512	-
gene51628:106590085	1.52746	0.0638085	16.2542	8.92592e-05	0.000685775	XP_014036108.1	LOC106590085	tubulin beta-5 chain	protein_coding	ssa29	8529508	8542808	+	TUBB6
gene51657:106590111	-1.62477	0.271893	17.0556	6.11254e-05	0.000500547	XP_014036165.1	LOC106590111	disks large-associated protein 1-like	protein_coding	ssa29	10315123	10621884	+	DLGAP1
gene51815:106590294	1.75389	1.43054	35.4126	1.92504e-08	5.41933e-07	XP_014036618.1	LOC106590294	uncharacterized LOC106590294	protein_coding	ssa29	17786779	17850364	+	AHRR
gene51857:106590260	-1.08478	3.25974	69.9592	4.6498e-14	7.11106e-12	XP_014036550.1	pck2	phosphoenolpyruvate carboxykinase 2 (mitochondrial)	protein_coding	ssa29	20114736	20133302	+	PCK2
gene51858:106590259	-2.26737	0.537122	45.0832	4.00453e-10	1.89885e-08	XP_014036549.1	LOC106590259	sialic acid-binding Ig-like lectin 6	protein_coding	ssa29	20159721	20171758	-
gene51876:106590329	1.1307	4.51105	70.6941	3.619e-14	5.87888e-12	XP_014036683.1	mak	male germ cell-associated kinase	protein_coding	ssa29	20874499	20888149	-	MAK
gene51882:101448068	-1.17865	4.44888	108.137	2.93813e-19	1.58337e-16	XP_014036704.1	impa2	inositol(myo)-1(or 4)-monophosphatase 2	protein_coding	ssa29	21059470	21065566	+	IMPA2
gene5189:106591679	1.88184	4.07305	167.052	6.92564e-26	1.56755e-22	XP_014038378.1	LOC106591679	dnaJ homolog subfamily B member 1-like	protein_coding	ssa02	61942621	61947428	+	DNAJB1
gene51900:106590348	1.1896	2.54811	13.1061	0.000406619	0.0024382	XP_014036748.1	LOC106590348	receptor-type tyrosine-protein phosphatase mu-like	protein_coding	ssa29	21793317	22067978	+	PTPRM
gene51932:106590387	1.94392	0.460555	11.4341	0.000927964	0.00483358	XP_014036836.1	LOC106590387	histone-lysine N-methyltransferase 2C-like	protein_coding	ssa29	23781686	23894974	-
gene52063:106590521	1.01301	3.99306	20.8699	1.04659e-05	0.000113342	XP_014037086.1	LOC106590521	uncharacterized LOC106590521	protein_coding	ssa29	27731100	27743782	-
gene52068:106590527	1.14672	0.700716	12.0044	0.000698732	0.00381516	XP_014037105.1	LOC106590527	extensin-like	protein_coding	ssa29	27762565	27765069	+
gene52078:100380496	-1.13922	4.71745	102.379	1.57919e-18	7.77033e-16	XP_014037097.1	bmi1a	B lymphoma Mo-MLV insertion region 1a	protein_coding	ssa29	28095017	28103631	+	COMMD3-BMI1
gene52084:106590546	2.63229	-1.03473	10.2417	0.00168785	0.00790184	XP_014037131.1	LOC106590546	zinc finger homeobox protein 4-like	protein_coding	ssa29	28561317	28634519	-	ZFHX4
gene52110:106590567	-2.65561	-0.718787	26.0748	1.01905e-06	1.57765e-05	XP_014037153.1	LOC106590567	zinc finger protein 2 homolog	protein_coding	ssa29	30127498	30314950	+
gene52133:106590589	-1.40092	1.89149	53.3408	1.73201e-11	1.27834e-09	XP_014037176.1	LOC106590589	arylamine N-acetyltransferase%2C pineal gland isozyme NAT-10-like	protein_coding	ssa29	31646432	31647613	+
gene52144:106590600	1.5983	1.16778	16.826	6.81088e-05	0.000549907	XP_014037195.1	LOC106590600	pleckstrin homology-like domain family B member 2	protein_coding	ssa29	31903402	31966630	+	PHLDB2
gene52147:106590608	1.65583	4.36655	75.3355	7.62153e-15	1.51321e-12	XP_014037209.1	LOC106590608	methionine synthase reductase-like	protein_coding	ssa29	31983161	32003450	+
gene52183:106590649	1.31104	1.08713	16.9742	6.35143e-05	0.000517189	XP_014037260.1	LOC106590649	tissue factor-like	protein_coding	ssa29	35646094	35675246	-	F3
gene52195:106590660	1.90276	4.39567	79.8583	1.74291e-15	4.351e-13	XP_014037280.1	LOC106590660	XK-related protein 9-like	protein_coding	ssa29	36945726	36954911	-	XKR9
gene52240:106590700	2.02534	-0.899193	10.3089	0.00163148	0.00768457	XP_014037334.1	LOC106590700	kelch-like protein 40b	protein_coding	ssa29	41565919	41571985	+	KLHL40
gene52252:106590713	2.4792	-0.440303	16.4474	8.14527e-05	0.000637869	XP_014037344.1	LOC106590713	kelch-like protein 40b	protein_coding	ssa29	42058114	42061938	+	KLHL40
gene52266:106595082	-1.08638	1.58794	10.6378	0.00138209	0.0067129					NW_012354549.1	5489	7234	-
gene52402:106590982	-1.6443	-0.115503	18.3662	3.3096e-05	0.000299319	XP_014037634.1	LOC106590982	gastrula zinc finger protein XlCGF57.1-like	protein_coding	NW_012343278.1	8788	18583	+	ZNF544
gene52441:106595088	1.68782	1.27731	12.0916	0.000669863	0.00369077					NW_012354572.1	4333	5134	+
gene5283:106592474	-1.43393	-0.246215	13.9451	0.000270043	0.00173772					ssa02	63438584	63440698	-
gene5286:106592549	1.26993	1.75341	12.4144	0.000570753	0.00323122	XP_014039369.1	LOC106592549	meteorin-like protein	protein_coding	ssa02	63573812	63577929	-	METRNL
gene52871:100196260	-1.28361	0.903161	19.9642	1.58089e-05	0.00016089	NP_001134761.1	rayl	GTP-binding protein RAY-like	protein_coding	NW_012343351.1	23693	25017	+	IFT27
gene5292:106592646	1.24902	3.88746	15.79	0.000111832	0.000830811	XP_014039469.1	LOC106592646	GTPase IMAP family member 4-like	protein_coding	ssa02	63705771	63712275	+	GIMAP7
gene53:106582002	1.45479	2.30848	16.3819	8.41319e-05	0.000654228	XP_014020495.1	LOC106582002	papilin-like	protein_coding	ssa01	2362314	2430188	+
gene53076:106590912	1.78466	-0.21413	13.2832	0.000372634	0.00226645	XP_014037560.1	rgs11	regulator of G-protein signaling 11	protein_coding	NW_012342800.1	220492	238664	+	RGS11
gene5311:106592797	-1.13177	0.611269	11.5361	0.000881626	0.00463417	XP_014039606.1	LOC106592797	piggyBac transposable element-derived protein 4-like	protein_coding	ssa02	64182864	64187715	+	PGBD3
gene53119:106594217	1.1084	1.10687	11.0549	0.00112098	0.00564916	XP_014041065.1	LOC106594217	beta-1%2C3-N-acetylglucosaminyltransferase lunatic fringe-like	protein_coding	NW_012352147.1	273	9969	+	LFNG
gene53221:106595112	-1.02718	5.35991	19.5835	1.89494e-05	0.000187777	XP_014041961.1	LOC106595112	mpv17-like protein	protein_coding	NW_012354674.1	550	6533	+
gene53479:106591707	-1.43298	0.356556	27.4399	5.61549e-07	9.49068e-06	XP_014038403.1	LOC106591707	zinc finger protein 2 homolog	protein_coding	NW_012345608.1	30559	32081	-	ZNF180
gene5361:106593232	-1.47206	-0.210359	11.9747	0.000709089	0.00386239	XP_014040052.1	LOC106593232	zinc finger protein OZF-like	protein_coding	ssa02	66005570	66020107	-	ZNF544
gene53675:106592682	-1.20366	1.0299	22.3174	5.41769e-06	6.48347e-05					NW_012348647.1	9625	10589	+
gene5380:106593448	-1.04893	0.545429	11.6901	0.00081661	0.00434897	XP_014040260.1	LOC106593448	zinc finger protein 664-like	protein_coding	ssa02	66674352	66679391	-
gene5382:106593366	1.38845	-0.448997	10.7993	0.00127428	0.00627819	XP_014040182.1	LOC106593366	zinc finger protein 3-like	protein_coding	ssa02	66722758	66754312	-
gene53898:106593998	1.17407	2.35569	13.6338	0.000314222	0.00196394	XP_014040848.1	LOC106593998	plexin-B2-like	protein_coding	NW_012351514.1	3135	12546	+	PLXNB2
gene53914:106591915	1.5956	-0.537145	9.67603	0.00224947	0.00994555	XP_014038659.1	LOC106591915	F-box/WD repeat-containing protein 7-like	protein_coding	NW_012347394.1	5119	14274	+	FBXW7
gene5400:106593639	1.77923	1.31959	13.5024	0.000335253	0.00207364	XP_014040503.1	LOC106593639	nucleus accumbens-associated protein 1-like	protein_coding	ssa02	67216475	67231421	-
gene54050:106593221	1.49807	0.38737	10.3417	0.00160467	0.00758038	XP_014040038.1	LOC106593221	uncharacterized LOC106593221	protein_coding	NW_012349692.1	1512	14816	-
gene54162:106591854	1.23918	1.48843	13.7679	0.000294298	0.00187006	XP_014038598.1	LOC106591854	zinc finger protein 106-like	protein_coding	NW_012347317.1	8435	12520	-	ZNF106
gene5419:106593849	-1.84268	-0.205237	22.7063	4.54746e-06	5.58982e-05	XP_014040714.1	LOC106593849	zinc finger protein 32-like	protein_coding	ssa02	67662185	67670153	-
gene5420:106593831	-1.19503	0.947631	15.9881	0.00010128	0.000762771	XP_014040696.1	LOC106593831	zinc finger protein 420-like	protein_coding	ssa02	67683126	67722606	-
gene5434:106593991	-1.156	1.40456	26.4381	8.69109e-07	1.37755e-05	XP_014040844.1	LOC106593991	zinc finger protein 239-like	protein_coding	ssa02	67976368	67978596	-
gene5437:106594023	-1.362	0.918417	22.8308	4.3e-06	5.33586e-05	XP_014040873.1	LOC106594023	zinc finger protein 883-like	protein_coding	ssa02	68058381	68071418	-
gene5452:106594192	3.4188	0.217179	46.574	2.24718e-10	1.14556e-08	XP_014041045.1	LOC106594192	uncharacterized LOC106594192	protein_coding	ssa02	68238275	68242476	-
gene54536:106591075	-1.25057	0.178942	17.5649	4.81202e-05	0.000409558	XP_014037741.1	LOC106591075	zinc finger protein 2 homolog	protein_coding	NW_012343411.1	29634	56796	-
gene5454:106594195	-1.41722	0.349125	18.4332	3.20799e-05	0.00029184	XP_014041049.1	LOC106594195	zinc finger protein 501-like	protein_coding	ssa02	68252950	68259469	+
gene5455:106594204	-1.18698	1.34911	27.9942	4.41584e-07	7.75105e-06	XP_014041057.1	LOC106594204	gastrula zinc finger protein XlCGF17.1-like	protein_coding	ssa02	68269717	68280562	+
gene54620:106591125	2.11525	5.23161	90.6555	5.81554e-17	2.0567e-14	XP_014037791.1	LOC106591125	serine/threonine-protein kinase Sgk1-like	protein_coding	NW_012343464.1	386	5518	+	SGK1
gene54636:106591582	1.89585	-0.450509	9.69401	0.00222895	0.00987281	XP_014038271.1	LOC106591582	fibronectin type III domain-containing protein 3B-like	protein_coding	NW_012344665.1	205	39336	+	FNDC3B
gene5467:106594366	-2.14675	-0.504934	20.5236	1.22334e-05	0.000129308	XP_014041205.1	LOC106594366	zinc finger protein 135-like	protein_coding	ssa02	68637924	68644390	+
gene5468:106594343	-1.2742	1.2939	24.4823	2.05731e-06	2.84744e-05	XP_014041177.1	LOC106594343	zinc finger protein with KRAB and SCAN domains 7-like	protein_coding	ssa02	68670445	68682757	+
gene5471:106594372	-2.1573	0.193983	19.3143	2.13248e-05	0.000207094	XP_014041215.1	LOC106594372	zinc finger protein 568-like	protein_coding	ssa02	68730537	68745482	-
gene54768:106594083	2.74414	2.72682	75.1594	8.12705e-15	1.58576e-12	XP_014040927.1	LOC106594083	serine/threonine-protein kinase Sgk1	protein_coding	NW_012351792.1	46	3258	-
gene54808:106592622	-2.68886	3.16457	43.3817	7.99258e-10	3.47723e-08	XP_014039438.1	LOC106592622	fish-egg lectin-like	protein_coding	NW_012348558.1	38	592	+
gene5481:106594474	-1.40819	-0.216845	14.2871	0.000228841	0.00150803	XP_014041322.1	LOC106594474	zinc finger protein 664-like	protein_coding	ssa02	68999175	69017016	+	ZNF180
gene54811:106593276	1.22855	1.86329	24.237	2.29411e-06	3.12676e-05	XP_014040087.1	LOC106593276	uncharacterized LOC106593276	protein_coding	NW_012349795.1	4199	14294	+
gene5489:106594570	-1.43212	0.139535	15.1643	0.00015006	0.00106051	XP_014041411.1	LOC106594570	zinc finger protein 436-like	protein_coding	ssa02	69337785	69347133	+
gene55028:106591555	1.23618	1.14323	14.2629	0.000231541	0.00152198	XP_014038245.1	LOC106591555	exportin-1-like	protein_coding	NW_012344493.1	5538	40402	+	XPO1
gene5508:106594893	-1.22279	0.201123	13.0055	0.000426831	0.00253789	XP_014041756.1	LOC106594893	zinc finger protein 135-like	protein_coding	ssa02	69701359	69707249	+
gene5509:106594907	-1.46165	-0.415609	10.922	0.00119819	0.00597353	XP_014041768.1	LOC106594907	zinc finger protein 329-like	protein_coding	ssa02	69710656	69712935	+
gene5517:106594902	-1.64154	-0.319872	13.7971	0.000290151	0.00184785	XP_014041767.1	LOC106594902	zinc finger protein 239-like	protein_coding	ssa02	69862483	69867498	+
gene5519:106594799	-1.08139	0.755405	10.7001	0.00133943	0.00654597	XP_014041661.1	LOC106594799	zinc finger protein 345-like	protein_coding	ssa02	69888129	69905667	-
gene5526:106594941	-1.13126	0.932675	17.1743	5.78048e-05	0.000477734	XP_014041806.1	LOC106594941	zinc finger protein 883-like	protein_coding	ssa02	70101746	70109797	+
gene5532:106594755	-1.32707	0.268733	14.1481	0.000244755	0.00159709	XP_014041619.1	LOC106594755	zinc finger protein 239-like	protein_coding	ssa02	70168206	70169381	+	ZNF544
gene5534:106594966	-1.69725	1.1181	47.5274	1.55697e-10	8.36403e-09	XP_014041831.1	LOC106594966	zinc finger protein 239-like	protein_coding	ssa02	70186627	70207475	+
gene5535:106594978	-1.80012	-0.333328	19.64	1.8351e-05	0.000182708	XP_014041843.1	LOC106594978	zinc finger protein 239-like	protein_coding	ssa02	70212656	70230668	+	ZNF544
gene5536:106594764	-1.71479	0.844743	32.9483	5.35975e-08	1.28412e-06	XP_014041631.1	LOC106594764	zinc finger protein 658B-like	protein_coding	ssa02	70251368	70280122	+
gene5541:106595040	-1.68098	-0.731068	11.2399	0.00102193	0.0052355	XP_014041896.1	LOC106595040	zinc finger protein 2 homolog	protein_coding	ssa02	70687930	70688868	-	ZNF180
gene5547:106595093	-1.4079	1.46516	39.986	2.99879e-09	1.08195e-07	XP_014041944.1	LOC106595093	zinc finger protein 501-like	protein_coding	ssa02	70811663	70826728	+	ZNF544
gene5551:106595305	-1.49946	0.433861	15.9167	0.000104777	0.00078475	XP_014042159.1	LOC106595305	zinc finger and SCAN domain-containing protein 31-like	protein_coding	ssa02	70902802	70913589	+
gene5559:106595152	-1.9563	0.235751	28.3477	3.79004e-07	6.81183e-06	XP_014042005.1	LOC106595152	zinc finger protein 135-like	protein_coding	ssa02	71026852	71038830	+
gene55718:106595124	1.68566	0.365481	12.7086	0.000493735	0.00286397	XP_014041976.1	LOC106595124	1-phosphatidylinositol 4%2C5-bisphosphate phosphodiesterase beta-3-like	protein_coding	NW_012354710.1	3871	9058	+
gene5573:106595177	-1.2979	0.472669	18.4027	3.25397e-05	0.000295231	XP_014042030.1	LOC106595177	zinc finger protein 239-like	protein_coding	ssa02	71227641	71239911	+
gene5574:106595183	-1.17198	0.674123	13.2772	0.000373735	0.00227233	XP_014042041.1	LOC106595183	zinc finger protein 436-like	protein_coding	ssa02	71244866	71256650	+
gene5576:106595370	1.59775	1.85136	10.212	0.00171607	0.00802067	XP_014042218.1	LOC106595370	fascin-like	protein_coding	ssa02	71273754	71285490	-	FSCN1
gene55851:106596484	1.29593	2.03696	11.1714	0.00105852	0.00539281					NW_012360419.1	1375	4890	+
gene5602:106595612	-2.13067	-0.315831	21.4528	8.01121e-06	9.04819e-05					ssa02	71934004	71945113	+
gene5603:106595726	-1.88439	-0.340424	18.8709	2.6181e-05	0.000245545	XP_014042561.1	LOC106595726	zinc finger protein 239-like	protein_coding	ssa02	71954783	71964941	+
gene5604:106595703	-1.7942	0.0284441	18.9494	2.52456e-05	0.000238286	XP_014042541.1	LOC106595703	zinc finger protein 501-like	protein_coding	ssa02	71969654	71974816	+
gene5605:106595637	-1.2109	0.466605	13.7617	0.000295184	0.00187533	XP_014042480.1	LOC106595637	piggyBac transposable element-derived protein 4-like	protein_coding	ssa02	71990871	71998387	+	PGBD3
gene5607:106595654	-1.36106	1.6211	19.4019	2.04797e-05	0.000200318	XP_014042496.1	LOC106595654	piggyBac transposable element-derived protein 4-like	protein_coding	ssa02	72086033	72090389	+	PGBD3
gene5611:106595623	-1.3498	0.565408	15.9421	0.00010352	0.000777106					ssa02	72146800	72148333	-
gene5613:106595670	-1.28552	0.817214	21.8531	6.68198e-06	7.7612e-05	XP_014042512.1	LOC106595670	gastrula zinc finger protein XlCGF26.1-like	protein_coding	ssa02	72185947	72192989	+	ZNF544
gene56152:106593155	1.5289	1.86609	14.3958	0.0002173	0.0014463	XP_014039966.1	LOC106593155	serine/arginine repetitive matrix protein 2-like	protein_coding	NW_012349520.1	7	6554	-
gene5623:106595815	-1.02453	8.71448	71.893	2.40913e-14	4.15189e-12	XP_014042641.1	LOC106595815	actin%2C cytoplasmic 1-like	protein_coding	ssa02	72398258	72402849	+	ACTG1
gene5630:106595862	-3.29848	-0.640713	30.2276	1.69198e-07	3.42746e-06	XP_014042688.1	LOC106595862	zinc finger protein 883-like	protein_coding	ssa02	72653327	72678842	+	ZCCHC3
gene5632:106595890	-1.30695	0.853591	26.2473	9.44815e-07	1.47822e-05	XP_014042709.1	LOC106595890	zinc finger protein 501-like	protein_coding	ssa02	72736338	72746222	-
gene56427:106591944	5.01528	1.10397	55.0141	1.05669e-11	8.17212e-10	XP_014038685.1	LOC106591944	secretogranin-2-like	protein_coding	NW_012347437.1	21808	25619	+
gene56580:100380811	3.45882	4.09596	67.9422	1.00395e-13	1.39122e-11	NP_001167404.1	gadl1	glutamate decarboxylase-like 1	protein_coding	NW_012343443.1	38240	56951	+	GADL1
gene5661:106596140	1.55938	-0.568562	9.7373	0.00218033	0.00970685	XP_014042936.1	LOC106596140	uncharacterized LOC106596140	protein_coding	ssa03	711724	714083	+
gene5675:106596267	1.36789	0.993039	13.0748	0.000412594	0.00246836	XP_014043052.1	LOC106596267	casein kinase I isoform gamma-3-like	protein_coding	ssa03	1131758	1181831	-
gene56763:106595050	1.29738	1.15945	13.5938	0.000320283	0.00199559	XP_014041901.1	LOC106595050	arf-GAP with Rho-GAP domain%2C ANK repeat and PH domain-containing protein 1-like	protein_coding	NW_012354425.1	2643	7898	+
gene5684:106596333	1.37201	2.8279	23.4495	3.26203e-06	4.21901e-05	XP_014043117.1	zfyve9	zinc finger%2C FYVE domain containing 9	protein_coding	ssa03	1709123	1727231	-
gene5685:106596356	2.05524	0.105912	26.1834	9.71668e-07	1.51396e-05					ssa03	1731283	1734153	-
gene56980:106592433	-1.42491	1.82817	53.2693	1.77865e-11	1.30708e-09					NW_012348200.1	14823	16276	-
gene5700:106596449	1.02552	1.30388	10.3259	0.00161749	0.00763137	XP_014043208.1	cc2d1b	coiled-coil and C2 domain containing 1B	protein_coding	ssa03	2033653	2040551	-	CC2D1B
gene5702:106596460	-1.22579	2.09746	35.4805	1.87191e-08	5.28289e-07	XP_014043231.1	LOC106596460	serine/threonine-protein kinase MAK-like	protein_coding	ssa03	2136860	2182540	+
gene57065:106595449	1.79901	0.348492	16.1758	9.26414e-05	0.00070762	XP_014042296.1	LOC106595449	E3 ubiquitin-protein ligase HECW2-like	protein_coding	NW_012355748.1	221	9442	-
gene57355:106592182	1.38534	4.91659	101.061	2.33318e-18	1.07046e-15	XP_014038972.1	LOC106592182	protein Tob1-like	protein_coding	NW_012347787.1	14034	18007	-	TOB1
gene5752:106597204	-2.02165	0.446083	18.1391	3.67911e-05	0.000327674	XP_014043900.1	LOC106597204	pinopsin-like	protein_coding	ssa03	5220495	5278171	-
gene57638:106591864	-1.03764	0.599066	14.2799	0.000229648	0.00151159					NW_012347326.1	248	673	+
gene57700:106595667	-1.35309	3.79511	23.508	3.19364e-06	4.1416e-05					NW_012356616.1	3851	8234	-
gene57709:106592319	1.80407	0.360762	11.1705	0.001058	0.00539098	XP_014039132.1	LOC106592319	low-density lipoprotein receptor-related protein 1-like	protein_coding	NW_012347996.1	3345	20302	+	LRP1
gene5771:100380659	1.23005	7.49895	65.3432	2.29123e-13	2.88822e-11	XP_014043762.1	LOC100380659	E3 ubiquitin-protein ligase RNF213	protein_coding	ssa03	6205878	6267157	-
gene5776:106597258	1.84285	1.2048	28.9413	2.93473e-07	5.49266e-06	XP_014043943.1	LOC106597258	E3 ubiquitin-protein ligase RNF213-like	protein_coding	ssa03	6352495	6388233	+
gene5779:106597311	1.09983	5.27542	14.6423	0.00019382	0.00131634	XP_014043995.1	LOC106597311	C-C chemokine receptor type 9-like	protein_coding	ssa03	6473710	6478132	+	CCR9
gene57845:106598391	2.25476	-0.557059	13.8928	0.000276987	0.00177668	XP_014044903.1	LOC106598391	Smith-Magenis syndrome chromosomal region candidate gene 8 protein homolog	protein_coding	NW_012377587.1	148	3688	-	SMCR8
gene57978:106593794	1.46425	1.52708	16.4832	8.00832e-05	0.000628939	XP_014040660.1	LOC106593794	zinc finger protein 598-like	protein_coding	NW_012350991.1	1363	9417	+	ZNF598
gene58068:106595527	1.14441	0.0316466	10.2568	0.001675	0.00785037	XP_014042373.1	LOC106595527	fibroblast growth factor receptor 3	protein_coding	NW_012356099.1	2115	6938	+
gene58197:106594354	1.47295	3.26421	17.3998	5.22457e-05	0.000437866	XP_014041186.1	LOC106594354	zinc finger protein 106-like	protein_coding	NW_012352500.1	1963	9647	+	ZNF106
gene58578:106593130	2.64417	-0.36765	24.4242	2.11104e-06	2.9064e-05	XP_014039941.1	LOC106593130	F-BAR and double SH3 domains protein 2-like	protein_coding	NW_012349465.1	1530	10270	-
gene58643:106592762	-2.15736	0.0350399	29.7509	2.07389e-07	4.08652e-06	XP_014039562.1	LOC106592762	gastrula zinc finger protein XlCGF17.1-like	protein_coding	NW_012348762.1	2753	11412	+	ZNF180
gene58789:106595199	1.29134	1.23872	15.327	0.000138816	0.000994292	XP_014042056.1	LOC106595199	transmembrane protein 8A-like	protein_coding	NW_012354906.1	3704	8514	+	TMEM8A
gene59864:106592017	1.2723	1.75556	15.7533	0.000113255	0.000839362	XP_014038791.1	LOC106592017	PH-interacting protein-like	protein_coding	NW_012347534.1	11818	25122	+	PHIP
gene59949:106594802	1.41255	0.693072	17.5017	4.95655e-05	0.000419965	XP_014041660.1	LOC106594802	exportin-1-like	protein_coding	NW_012353734.1	3555	10483	-	XPO1
gene600:106598880	-1.3336	1.4561	39.774	3.26503e-09	1.16074e-07					ssa01	27149594	27216306	+
gene601:106598828	-1.29671	2.5219	56.6274	5.15789e-12	4.35611e-10	XP_014045315.1	trmt5	tRNA methyltransferase 5	protein_coding	ssa01	27216039	27219140	-	TRMT5
gene60205:106594197	1.59964	1.36428	14.6735	0.000190055	0.00129569	XP_014041047.1	LOC106594197	neurobeachin-like protein 2	protein_coding	NW_012352076.1	773	11009	+	NBEAL2
gene60224:106592105	1.34189	0.703021	14.8874	0.000171373	0.00119008	XP_014038883.1	LOC106592105	inositol 1%2C4%2C5-trisphosphate receptor-interacting protein-like 2	protein_coding	NW_012347665.1	9883	16582	+	ITPRIPL2
gene60237:106593406	-1.50435	-0.196793	10.0881	0.00182434	0.00841552	XP_014040215.1	LOC106593406	gastrula zinc finger protein XlCGF17.1-like	protein_coding	NW_012350089.1	7158	13347	-	ZNF180
gene605:106598946	-1.32524	2.60994	73.1268	1.58873e-14	2.86909e-12	XP_014045453.1	LOC106598946	snRNA-activating protein complex subunit 1-like	protein_coding	ssa01	27340545	27348724	+	SNAPC1
gene60513:106592954	1.34186	0.980948	14.4946	0.000207035	0.00139299	XP_014039782.1	LOC106592954	calcium-transporting ATPase type 2C member 1-like	protein_coding	NW_012349168.1	3413	16499	+	ATP2C1
gene60531:106594282	-1.47616	0.578816	22.0386	6.14436e-06	7.21325e-05	XP_014041125.1	LOC106594282	piggyBac transposable element-derived protein 4-like	protein_coding	NW_012352334.1	4115	10062	-	PGBD3
gene60559:106591989	1.38848	0.23187	10.3447	0.00160221	0.00757086	XP_014038754.1	LOC106591989	dorsal-ventral patterning tolloid-like protein 1	protein_coding	NW_012347498.1	14091	22692	+
gene6061:106598526	1.07627	6.63887	24.5437	2.01875e-06	2.80551e-05	XP_014045048.1	LOC106598526	regulator of G-protein signaling 21-like	protein_coding	ssa03	10147628	10149963	+	RGS13
gene60623:106594431	1.11769	1.72058	14.3472	0.000222295	0.00147089	XP_014041279.1	LOC106594431	uncharacterized LOC106594431	protein_coding	NW_012352718.1	4143	6612	+
gene60836:106594355	1.55273	1.13971	11.3086	0.000987862	0.00508705	XP_014041187.1	enpp5	ectonucleotide pyrophosphatase/phosphodiesterase 5 (putative)	protein_coding	NW_012352501.1	3180	8301	+	ENPP5
gene6084:106598808	1.13568	2.53867	15.7593	0.000112938	0.000837351	XP_014045288.1	LOC106598808	phosphatidylinositol 4%2C5-bisphosphate 3-kinase catalytic subunit alpha isoform-like	protein_coding	ssa03	10905294	10923185	-	PIK3CA
gene60947:106592201	1.1038	4.18579	38.4441	5.58066e-09	1.84488e-07	XP_014038995.1	LOC106592201	coatomer subunit beta'-like	protein_coding	NW_012347812.1	82	16796	+
gene6126:106598886	1.5534	0.445841	23.5311	3.14211e-06	4.08414e-05	XP_014045383.1	bok	BCL2-related ovarian killer	protein_coding	ssa03	12034488	12048758	-	BOK
gene6148:106598913	-1.25915	2.1161	32.8887	5.49539e-08	1.31113e-06	XP_014045413.1	LOC106598913	zinc finger protein Gfi-1-like	protein_coding	ssa03	12319440	12325104	-	GFI1
gene6159:106598934	1.5058	3.96065	91.5415	4.18332e-17	1.52718e-14	XP_014045437.1	LOC106598934	growth arrest and DNA damage-inducible protein GADD45 alpha-like	protein_coding	ssa03	12543542	12546292	-	GADD45A
gene61616:106594092	2.79935	3.76758	55.6924	7.60777e-12	6.14979e-10	XP_014040939.1	LOC106594092	acidic amino acid decarboxylase GADL1-like	protein_coding	NW_012351839.1	4673	11908	-	GADL1
gene6180:100194912	1.60153	5.26276	59.3746	1.95273e-12	1.89963e-10	NP_001133413.1	angl4	Angiopoietin-related protein 4	protein_coding	ssa03	13243546	13250936	+	ANGPTL4
gene61857:106593018	-1.24514	2.63921	12.6835	0.000500563	0.00289566	XP_014039839.1	LOC106593018	arachidonate 15-lipoxygenase B-like	protein_coding	NW_012349275.1	841	4956	+
gene6195:106599022	-1.28279	2.76637	63.3876	4.5531e-13	5.24008e-11	XP_014045542.1	LOC106599022	ras-related protein Rab-3A-like	protein_coding	ssa03	13678928	13686298	+	RAB3A
gene6196:106599020	1.32959	4.64808	37.6702	7.71007e-09	2.4464e-07	XP_014045541.1	LOC106599020	transcription factor jun-D-like	protein_coding	ssa03	13686482	13688466	-	JUND
gene62118:106595041	2.38223	0.534912	18.7285	2.79873e-05	0.000260328	XP_014041893.1	LOC106595041	transcriptional coactivator YAP1-like	protein_coding	NW_012354412.1	4918	8966	+	YAP1
gene62121:106592506	-2.4671	0.619999	11.2284	0.00102993	0.00526975	XP_014039327.1	LOC106592506	uncharacterized LOC106592506	protein_coding	NW_012348320.1	23	6623	+
gene622:106586281	-1.07147	0.383604	11.5867	0.000859664	0.00454476	XP_014028918.1	trmt61a	tRNA methyltransferase 61A	protein_coding	ssa01	28141148	28156239	-
gene62201:106595409	-1.1394	0.00118401	10.9472	0.00118316	0.00591075	XP_014042255.1	LOC106595409	GTPase IMAP family member 7-like	protein_coding	NW_012355609.1	5645	8212	+	GIMAP7
gene62277:106594362	1.7396	-0.0462406	14.632	0.000193776	0.00131634	XP_014041194.1	LOC106594362	exportin-1-like	protein_coding	NW_012352515.1	3107	8339	+
gene62322:106593125	2.57806	-0.890626	11.5661	0.000868539	0.00458169	XP_014039936.1	LOC106593125	slit homolog 2 protein-like	protein_coding	NW_012349457.1	2525	4308	-
gene6246:106599103	-1.04025	0.187759	10.0833	0.00182881	0.00843154	XP_014045643.1	LOC106599103	retinoic acid receptor RXR-gamma-A-like	protein_coding	ssa03	15076653	15099785	-	RXRG
gene6247:100195849	-1.20239	2.40122	44.3093	5.41554e-10	2.48459e-08	XP_014045187.1	dusp12	dual specificity phosphatase 12	protein_coding	ssa03	15120139	15123285	+
gene62488:106593906	-1.01732	0.199148	10.9087	0.0012062	0.00600114					NW_012351279.1	7678	9726	+
gene62510:106592333	-2.39353	-0.0783898	31.7526	8.86045e-08	1.95975e-06	XP_014039143.1	LOC106592333	zinc finger protein 239-like	protein_coding	NW_012348015.1	4369	8311	-
gene626:106586342	-1.17014	1.31807	16.6747	7.31531e-05	0.000583557	XP_014029039.1	LOC106586342	exocyst complex component 3-like protein	protein_coding	ssa01	28216937	28220841	+
gene6263:106599137	-1.17757	0.756547	14.3827	0.000218525	0.00145217	XP_014045703.1	rwdd3	RWD domain containing 3	protein_coding	ssa03	15853169	15860310	-	RWDD3
gene6282:106598782	-1.0431	1.23965	22.8246	4.31217e-06	5.34562e-05					ssa03	16303245	16321039	-
gene6286:106599165	1.29274	2.23788	48.7887	9.61051e-11	5.53028e-09	XP_014045755.1	LOC106599165	alpha-tocopherol transfer protein-like	protein_coding	ssa03	16517000	16522404	+	TTPA
gene6290:106599585	1.75803	1.5585	13.9512	0.000269648	0.00173551	XP_014046355.1	LOC106599585	chromodomain-helicase-DNA-binding protein 7-like	protein_coding	ssa03	16746921	16805320	-
gene62982:106594099	1.47051	0.206474	19.5567	1.90691e-05	0.000188693	XP_014040945.1	LOC106594099	E3 ubiquitin/ISG15 ligase TRIM25-like	protein_coding	NW_012351848.1	3605	4404	-	TRIM52
gene63321:106591221	-1.46817	0.610787	24.7226	1.84943e-06	2.60215e-05	XP_014037907.1	LOC106591221	gastrula zinc finger protein XlCGF8.2DB-like	protein_coding	NW_012343573.1	32779	38328	+	ZNF544
gene6333:106599620	-1.89078	0.518227	13.0757	0.000412417	0.00246775	XP_014046384.1	LOC106599620	flocculation protein FLO11-like	protein_coding	ssa03	18813929	18819450	+
gene63341:106591178	1.84528	0.63663	12.649	0.000508559	0.00293242	XP_014037852.1	LOC106591178	serine/threonine-protein kinase WNK1-like	protein_coding	NW_012343532.1	38144	51815	+
gene63411:106595407	1.25911	1.11865	11.2665	0.00100846	0.00517583	XP_014042253.1	LOC106595407	casein kinase I isoform delta-B-like	protein_coding	NW_012355603.1	2032	6266	+
gene63532:106597545	2.11759	-0.20429	11.7206	0.000804308	0.00429829	XP_014044192.1	LOC106597545	fibrillin-1-like	protein_coding	NW_012366483.1	1303	4827	+
gene63583:106594116	1.54777	0.214999	13.0425	0.000419166	0.00249976	XP_014040960.1	LOC106594116	kalirin-like	protein_coding	NW_012351894.1	8887	9321	-
gene63698:106591410	2.12973	-0.0172204	20.0597	1.51305e-05	0.000155007	XP_014038107.1	LOC106591410	inner nuclear membrane protein Man1-like	protein_coding	NW_012343954.1	34824	43628	+	LEMD3
gene63768:106592120	-1.0303	2.68072	14.3555	0.000221409	0.00146617	XP_014038901.1	LOC106592120	gastrula zinc finger protein XlCGF17.1-like	protein_coding	NW_012347693.1	6730	19644	-	ZNF180
gene63817:106592024	1.07853	1.89293	10.4536	0.00151647	0.00722405	XP_014038799.1	LOC106592024	ras GTPase-activating protein 3-like	protein_coding	NW_012347547.1	195	20480	-
gene63990:106592169	-1.60548	0.144249	20.2314	1.39848e-05	0.000145154	XP_014038953.1	LOC106592169	gastrula zinc finger protein XlCGF52.1-like	protein_coding	NW_012347756.1	14172	18918	-	ZNF544
gene6401:106599380	-1.06067	1.36987	22.1384	5.87359e-06	6.94098e-05	XP_014046063.1	LOC106599380	coiled-coil domain-containing protein 24-like	protein_coding	ssa03	22894807	22914577	+	CCDC24
gene64341:106592807	3.37878	-0.576851	30.575	1.45929e-07	3.02101e-06	XP_014039615.1	LOC106592807	high-affinity choline transporter 1-like	protein_coding	NW_012348855.1	1578	15781	+	SLC5A7
gene64344:106592192	2.94437	1.28027	27.8612	4.71629e-07	8.19461e-06	XP_014038984.1	LOC106592192	metastasis suppressor protein 1-like	protein_coding	NW_012347796.1	13053	23324	-
gene64345:106592191	2.56532	0.256862	20.9324	1.01544e-05	0.000110498	XP_014038983.1	LOC106592191	vegetative cell wall protein gp1-like	protein_coding	NW_012347796.1	13053	15501	-
gene6444:106599321	1.628	-0.21405	11.8517	0.000753647	0.0040666	XP_014045965.1	LOC106599321	junctophilin-1-like	protein_coding	ssa03	24946942	24961196	-	JPH1
gene64489:106592426	-1.00799	1.24894	16.6947	7.24636e-05	0.000578601	XP_014039242.1	LOC106592426	zinc finger protein 271-like	protein_coding	NW_012348192.1	2736	7280	+	ZNF544
gene64543:106591755	2.14354	-0.281982	14.4496	0.000211576	0.00141793	XP_014038440.1	LOC106591755	nuclear pore complex protein Nup50-like	protein_coding	NW_012347142.1	28910	33178	+	NUP50
gene64565:106591171	-1.2336	1.45129	10.3344	0.00161086	0.00760325					NW_012343522.1	31854	33782	+
gene64598:106591355	1.47474	2.88321	18.3361	3.36857e-05	0.000304247	XP_014038053.1	LOC106591355	neurobeachin-like protein 2	protein_coding	NW_012343793.1	1959	44708	-
gene64697:106593047	-1.31911	0.865554	25.0215	1.62032e-06	2.32705e-05					NW_012349322.1	9151	12442	-
gene6476:106599272	1.45937	2.52659	12.3979	0.000576626	0.00325904	XP_014045892.1	LOC106599272	microtubule-associated protein 4-like	protein_coding	ssa03	25962781	26010360	+
gene64824:106599239	1.8098	-0.71525	11.638	0.000838039	0.00444845	XP_014045838.1	LOC106599239	chromodomain-helicase-DNA-binding protein 9-like	protein_coding	NW_012402944.1	8	1939	-
gene65014:106590801	1.0538	0.579433	9.92614	0.00198064	0.00899475	XP_014037431.1	LOC106590801	plexin-B3-like	protein_coding	NW_012341951.1	253	12238	-
gene65039:106593723	1.33639	2.13289	19.5113	1.94721e-05	0.000192123	XP_014040575.1	LOC106593723	bromodomain-containing protein 4-like	protein_coding	NW_012350818.1	6095	10928	-
gene65137:106591934	1.61219	0.380194	12.615	0.000516964	0.00297583					NW_012347420.1	6556	11753	-
gene65229:106592500	-1.35703	-0.610617	9.9634	0.00194352	0.00885672	XP_014039323.1	LOC106592500	X-linked retinitis pigmentosa GTPase regulator-interacting protein 1-like	protein_coding	NW_012348310.1	11201	12340	+
gene6530:106599739	2.5369	5.56111	89.2981	9.21406e-17	2.95119e-14	XP_014046516.1	LOC106599739	forkhead box protein Q1-like	protein_coding	ssa03	29438902	29440583	+	FOXQ1
gene65448:106592612	1.54943	-0.229707	9.98978	0.00191766	0.00876321	XP_014039426.1	LOC106592612	striated muscle preferentially expressed protein kinase-like	protein_coding	NW_012348534.1	2521	18225	-	SPEG
gene65459:106591141	1.94845	-0.328452	13.7385	0.000298532	0.00189094	XP_014037807.1	LOC106591141	EH domain-binding protein 1-like	protein_coding	NW_012343486.1	17049	52236	-	EHBP1
gene65512:106595975	1.55573	1.00513	11.3894	0.000948733	0.00492575	XP_014042787.1	LOC106595975	E3 ubiquitin-protein ligase UBR4-like	protein_coding	NW_012357823.1	755	7355	+
gene6556:106599802	1.17618	7.45267	47.283	1.71832e-10	9.08703e-09	XP_014046606.1	cebpd	CCAAT/enhancer binding protein (C/EBP)%2C delta	protein_coding	ssa03	30656473	30658083	-	CEBPD
gene65569:106593016	-1.30807	-0.454156	12.1683	0.000644322	0.00357758					NW_012349273.1	4275	5374	+
gene65660:106594055	1.44081	0.0598952	10.5407	0.00145137	0.00698051	XP_014040897.1	LOC106594055	beta-1%2C3-N-acetylglucosaminyltransferase lunatic fringe-like	protein_coding	NW_012351677.1	6249	9035	+
gene6569:106599844	-1.46384	1.83399	45.7593	3.07961e-10	1.50948e-08					ssa03	31459491	31463181	+
gene6576:106599867	-1.0019	3.72968	93.703	2.14986e-17	8.58706e-15	XP_014046691.1	LOC106599867	multiple myeloma tumor-associated protein 2 homolog	protein_coding	ssa03	31715820	31759640	+	C1orf35
gene6596:106599969	-1.41774	0.293877	11.1855	0.00105009	0.00535709	XP_014046775.1	LOC106599969	zinc finger protein 2 homolog	protein_coding	ssa03	32762343	32792496	-
gene6607:106600430	1.4573	1.65324	13.9435	0.000270414	0.00173912	XP_014047255.1	LOC106600430	phospholipase ABHD3-like	protein_coding	ssa03	33339929	33360001	-	ABHD3
gene66194:106591658	1.24816	0.899801	10.9195	0.00119968	0.00597685	XP_014038355.1	LOC106591658	TBC1 domain family member 2B-like	protein_coding	NW_012345029.1	29795	38374	-	TBC1D2B
gene66195:106592407	-1.36665	2.30301	47.4922	1.57811e-10	8.45086e-09	XP_014039221.1	LOC106592407	4-aminobutyrate aminotransferase%2C mitochondrial-like	protein_coding	NW_012348157.1	4973	15314	-	ABAT
gene66229:106590948	-1.12216	0.165249	12.057	0.000680774	0.00373843	XP_014037600.1	LOC106590948	zinc finger protein 239-like	protein_coding	NW_012343189.1	133919	137060	-
gene66417:106591512	2.82696	0.614479	48.6485	1.01383e-10	5.74633e-09					NW_012344304.1	27842	29033	-
gene66418:106591511	2.05904	-0.475647	18.5312	3.06517e-05	0.000280652	XP_014038210.1	LOC106591511	FH2 domain-containing protein 1-like	protein_coding	NW_012344304.1	37031	38115	-	FHDC1
gene66464:106593247	1.31537	0.759624	10.7464	0.0013086	0.00641657	XP_014040064.1	LOC106593247	epsin-2-like	protein_coding	NW_012349743.1	2886	10144	+
gene66611:106591070	2.37377	-0.663052	12.8319	0.000464743	0.00272302	XP_014037733.1	LOC106591070	F-BAR and double SH3 domains protein 2-like	protein_coding	NW_012343404.1	2241	25730	+
gene66680:106594768	1.28744	1.51278	13.2844	0.000372421	0.00226626	XP_014041632.1	LOC106594768	arf-GAP with Rho-GAP domain%2C ANK repeat and PH domain-containing protein 3-like	protein_coding	NW_012353610.1	1191	10709	+	ARAP3
gene6673:106600345	-1.01665	2.87371	49.2971	7.91974e-11	4.72554e-09	XP_014047123.1	LOC106600345	heterogeneous nuclear ribonucleoprotein C-like	protein_coding	ssa03	35105980	35128306	-	HNRNPC
gene66762:106593206	-1.28068	0.637406	16.2567	8.91557e-05	0.00068529	XP_014040019.1	LOC106593206	gastrula zinc finger protein XlCGF57.1-like	protein_coding	NW_012349667.1	3164	10863	+	ZNF544
gene6689:106600272	-1.73054	2.37083	65.2338	2.38056e-13	2.94972e-11					ssa03	35446436	35450408	-
gene67027:106597692	-1.04529	1.65282	21.2621	8.73608e-06	9.72773e-05	XP_014044324.1	LOC106597692	pleckstrin homology-like domain family A member 1	protein_coding	NW_012367804.1	2479	4754	+	PHLDA1
gene6708:106600212	1.69139	1.83112	50.8906	4.33322e-11	2.83463e-09	XP_014047009.1	LOC106600212	C-X-C chemokine receptor type 4-like	protein_coding	ssa03	36120326	36124628	-
gene6731:106600446	-1.15711	3.53559	34.1988	3.18137e-08	8.24509e-07	XP_014047281.1	LOC106600446	C-C motif chemokine 4-like	protein_coding	ssa03	36726437	36727860	+
gene67450:106592126	1.158	1.2295	16.5388	7.80046e-05	0.000615764	XP_014038909.1	LOC106592126	G protein-coupled receptor kinase 6-like	protein_coding	NW_012347702.1	5216	5654	+
gene67577:106593526	-1.73101	-0.720845	9.92849	0.00197828	0.00898883	XP_014040341.1	LOC106593526	Kv channel-interacting protein 4-like	protein_coding	NW_012350352.1	522	9047	+
gene6758:106599936	-1.44178	-0.315294	12.8495	0.000460731	0.00270534	XP_014046753.1	LOC106599936	G-protein coupled receptor 55-like	protein_coding	ssa03	37926952	37930047	-
gene67581:106592137	-1.77593	0.637158	32.345	6.90393e-08	1.58804e-06	XP_014038923.1	LOC106592137	zinc finger protein 239-like	protein_coding	NW_012347714.1	8060	10322	+
gene67582:106592136	-2.09969	-0.285253	18.6215	2.93925e-05	0.000270949					NW_012347714.1	10414	11453	+
gene6759:106600026	1.08835	3.03418	10.4377	0.00153103	0.00728216	XP_014046834.1	LOC106600026	nuclear receptor ROR-beta-like	protein_coding	ssa03	37981503	37998280	+
gene6789:106600481	-2.65664	0.328821	45.9999	2.80545e-10	1.39455e-08	XP_014047333.1	LOC106600481	zinc finger protein 180-like	protein_coding	ssa03	39218577	39220142	-	ZNF180
gene6799:106600478	-2.37334	-0.753137	16.7472	7.06918e-05	0.000567115	XP_014047329.1	LOC106600478	zinc finger protein 135-like	protein_coding	ssa03	39425022	39440242	+	ZNF180
gene68005:106593150	1.35653	-0.483274	10.1717	0.00174868	0.00813839	XP_014039961.1	LOC106593150	polypeptide N-acetylgalactosaminyltransferase 1-like	protein_coding	NW_012349505.1	3697	12101	-	GALNT1
gene68013:106593720	1.70832	1.30544	14.5184	0.000204815	0.00138189	XP_014040565.1	LOC106593720	thyroid receptor-interacting protein 11-like	protein_coding	NW_012350816.1	1324	10911	+
gene68291:106593751	-2.09076	0.107342	34.586	2.70925e-08	7.24836e-07	XP_014040601.1	LOC106593751	zinc finger protein 135-like	protein_coding	NW_012350897.1	5654	13476	-	ZNF544
gene68361:106595004	1.6465	1.15984	15.0329	0.000159816	0.0011193	XP_014041862.1	LOC106595004	T-lymphoma invasion and metastasis-inducing protein 1-like	protein_coding	NW_012354317.1	2566	6988	-
gene68379:106593819	1.31042	1.65638	9.79413	0.00211928	0.00948805	XP_014040683.1	LOC106593819	Smith-Magenis syndrome chromosomal region candidate gene 8 protein-like	protein_coding	NW_012351048.1	4935	11922	-	SMCR8
gene68485:106592338	1.21835	7.2069	58.2313	2.88601e-12	2.61288e-10					NW_012348023.1	1510	9571	+
gene68502:106592479	3.94942	4.48652	110.592	1.67568e-19	9.98085e-17	XP_014039309.1	LOC106592479	DNA damage-inducible transcript 4 protein-like	protein_coding	NW_012348273.1	2157	4405	+	DDIT4
gene68519:106594418	1.13937	1.53918	10.9563	0.00117779	0.0058865	XP_014041256.1	LOC106594418	protein NOXP20-like	protein_coding	NW_012352691.1	5515	11472	+	FAM114A1
gene6859:106600605	1.2047	3.75224	16.4259	8.26308e-05	0.000645364	XP_014047574.1	LOC106600605	N-acetyllactosaminide beta-1%2C3-N-acetylglucosaminyltransferase 2-like	protein_coding	ssa03	42169198	42213307	+	B3GNT2
gene68648:106593411	-1.3994	0.251956	20.1437	1.45583e-05	0.000150262	XP_014040221.1	LOC106593411	zinc finger protein 239-like	protein_coding	NW_012350095.1	5421	6836	-	ZNF544
gene6892:106600575	-1.60428	2.27817	78.9573	2.29453e-15	5.5644e-13	XP_014047520.1	eif4e2	eukaryotic translation initiation factor 4E family member 2	protein_coding	ssa03	43651494	43664837	-	EIF4E2
gene6896:106600572	1.62866	2.54923	21.9325	6.46417e-06	7.54435e-05	XP_014047515.1	LOC106600572	calmodulin-regulated spectrin-associated protein 2-like	protein_coding	ssa03	43758384	43835785	+	CAMSAP2
gene69324:106595747	-1.62965	0.0677545	22.7335	4.49217e-06	5.53789e-05	XP_014042581.1	LOC106595747	piggyBac transposable element-derived protein 4-like	protein_coding	NW_012356864.1	2767	5638	+	PGBD3
gene69470:106593951	-1.21343	1.61196	42.7768	9.88518e-10	4.17947e-08	XP_014040805.1	LOC106593951	probable GPI-anchored adhesin-like protein PGA55	protein_coding	NW_012351387.1	1914	4060	+	RBM43
gene69553:106590753	2.0105	-0.0158646	15.2302	0.000145394	0.00103269	XP_014037385.1	LOC106590753	patatin-like phospholipase domain-containing protein 2	protein_coding	NW_012341904.1	37	22165	-	PNPLA2
gene70015:106591518	1.63886	-0.174187	11.8368	0.000759229	0.00409347					NW_012344319.1	31817	40869	+
gene70461:106594213	2.7139	1.0064	70.6332	3.69492e-14	5.97362e-12					NW_012352134.1	6885	9889	-
gene70465:106596958	1.15346	0.00776647	10.4926	0.00148699	0.00711756	XP_014043678.1	LOC106596958	exportin-1-like	protein_coding	NW_012362806.1	1404	4265	-
gene70675:106594820	1.50237	0.0468586	14.1457	0.000245045	0.00159837	XP_014041680.1	LOC106594820	exportin-1-like	protein_coding	NW_012353792.1	1334	7248	-	XPO1
gene70704:106594826	-1.70844	0.263122	27.1688	6.31817e-07	1.04997e-05	XP_014041687.1	LOC106594826	zinc finger protein 501-like	protein_coding	NW_012353807.1	3225	5090	+	ZNF544
gene70863:106594621	1.82434	0.696636	12.7527	0.00048331	0.00281214	XP_014041501.1	LOC106594621	trinucleotide repeat-containing gene 6A protein-like	protein_coding	NW_012353185.1	2856	11169	+
gene7092:106600736	-1.40415	0.230377	18.7254	2.80081e-05	0.00026045	XP_014047797.1	LOC106600736	heat shock 70 kDa protein-like	protein_coding	ssa03	51566843	51568367	-
gene7097:106600739	1.02137	3.10518	14.1065	0.0002499	0.00162692	XP_014047805.1	atxn2l	ataxin 2-like	protein_coding	ssa03	51619925	51640830	+	ATXN2L
gene71003:106596229	1.55623	-0.176422	9.76284	0.00215216	0.00960788	XP_014043014.1	LOC106596229	proteasome-associated protein ECM29 homolog	protein_coding	NW_012359004.1	1714	7499	-	KIAA0368
gene7107:106600749	-1.28073	2.31059	16.8135	6.8511e-05	0.000552367	XP_014047824.1	LOC106600749	tumor suppressor candidate 5 homolog	protein_coding	ssa03	51828727	51847741	-
gene71137:106594387	-1.98475	0.530497	28.7086	3.24383e-07	5.98866e-06	XP_014041226.1	LOC106594387	zinc finger protein 271-like	protein_coding	NW_012352579.1	5407	6735	+	ZNF180
gene71293:106594275	1.84389	0.709763	10.4543	0.00151713	0.00722615	XP_014041120.1	LOC106594275	amyloid beta A4 precursor protein-binding family B member 2-like	protein_coding	NW_012352319.1	7	4810	-
gene71477:106596082	1.30976	0.782167	12.151	0.000649855	0.00360157	XP_014042872.1	LOC106596082	casein kinase I isoform delta-like	protein_coding	NW_012358272.1	524	4110	+
gene71637:100195627	-1.07686	2.09891	25.6193	1.24484e-06	1.86677e-05	NP_001134128.1	tsnax	translin-associated factor X	protein_coding	NW_012341975.1	1084	5719	+	TSNAX
gene71660:106595429	1.26468	2.62674	10.5169	0.00147119	0.00705585	XP_014042277.1	LOC106595429	cdc42-interacting protein 4 homolog	protein_coding	NW_012355680.1	7	9107	-	TRIP10
gene71661:106591203	-1.16927	1.76894	18.5894	2.98335e-05	0.00027427	XP_014037891.1	LOC106591203	protein tyrosine phosphatase type IVA 3-like	protein_coding	NW_012343555.1	41906	49985	-
gene71729:106593377	2.28081	-0.551959	19.1024	2.35192e-05	0.000224361	XP_014040188.1	LOC106593377	atherin-like	protein_coding	NW_012349998.1	6719	12294	+
gene7174:106600913	1.50235	4.79355	35.8958	1.60422e-08	4.61957e-07	XP_014048162.1	LOC106600913	GEM-interacting protein-like	protein_coding	ssa03	53675455	53722292	-	GMIP
gene71885:106598858	1.28405	3.03511	46.8657	2.00811e-10	1.04566e-08	XP_014045346.1	LOC106598858	succinate dehydrogenase [ubiquinone] flavoprotein subunit%2C mitochondrial-like	protein_coding	NW_012387759.1	284	2824	-
gene72055:106590907	-1.87178	-0.914272	11.2952	0.000994105	0.00511377	XP_014037558.1	LOC106590907	zinc finger protein 180-like	protein_coding	NW_012342786.1	19825	20942	-	ZNF180
gene721:106600889	-1.21363	2.90937	54.7839	1.01488e-11	7.8847e-10					ssa01	29764421	29807384	-
gene7212:106600973	-1.47676	2.29802	50.3635	5.28678e-11	3.34872e-09	XP_014048257.1	LOC106600973	beta-1%2C4-mannosyl-glycoprotein 4-beta-N-acetylglucosaminyltransferase-like	protein_coding	ssa03	54589510	54601967	-	MGAT3
gene72135:106597826	1.57908	-0.31609	15.806	0.000110449	0.000822156	XP_014044434.1	LOC106597826	unconventional myosin-X-like	protein_coding	NW_012369248.1	537	3500	+	MYO10
gene7242:106600865	-2.06594	-0.414256	19.4496	2.00342e-05	0.000196812	XP_014048070.1	LOC106600865	interferon a3	protein_coding	ssa03	55875156	55879301	+
gene7243:106600963	-1.82081	-0.340948	16.8601	6.70215e-05	0.00054229	XP_014048245.1	LOC106600963	interferon a3-like	protein_coding	ssa03	55922799	55926694	-
gene7248:106600863	1.26706	4.32653	32.1968	7.39404e-08	1.68706e-06	XP_014048066.1	LOC106600863	integrin alpha-3-like	protein_coding	ssa03	56062132	56098043	+	ITGA3
gene72480:106592292	-2.27339	-0.318268	32.9468	5.36329e-08	1.28412e-06	XP_014039094.1	LOC106592292	gastrula zinc finger protein XlCGF17.1-like	protein_coding	NW_012347963.1	8439	10266	+	ZNF180
gene725:106601609	1.41974	1.46467	20.6498	1.15478e-05	0.000123095	XP_014049425.1	LOC106601609	phospholipase DDHD1-like	protein_coding	ssa01	29946996	29986433	+	DDHD1
gene72607:106594641	-1.10375	0.853767	14.3706	0.000219805	0.00145754	XP_014041519.1	LOC106594641	zinc finger protein 239-like	protein_coding	NW_012353251.1	8729	11183	-
gene7265:106600850	2.43282	6.17957	115.014	4.57398e-20	3.04492e-17	XP_014048041.1	LOC106600850	pyruvate dehydrogenase (acetyl-transferring) kinase isozyme 2%2C mitochondrial-like	protein_coding	ssa03	56925222	56933199	-	PDK2
gene72681:106594754	-2.03464	-0.358103	18.3677	3.30738e-05	0.000299198	XP_014041616.1	LOC106594754	endonuclease III-like protein 1	protein_coding	NW_012353585.1	823	3961	-	NTHL1
gene72889:106592838	2.05844	-0.748397	11.4615	0.000914955	0.00477535					NW_012348916.1	6093	13891	-
gene7304:100286424	1.28194	2.8538	26.9727	6.88154e-07	1.13141e-05	NP_001139835.1	k1c1	Keratin%2C type I cytoskeletal 50 kDa	protein_coding	ssa03	57980585	57982104	+
gene7305:106600815	1.49441	1.40303	32.2468	7.19482e-08	1.64714e-06	XP_014047986.1	LOC106600815	keratin%2C type I cytoskeletal 50 kDa-like	protein_coding	ssa03	57991121	57994461	+	KRT14
gene73169:106593440	1.15604	1.13239	20.1302	1.46493e-05	0.000150943	XP_014040247.1	LOC106593440	rab GTPase-activating protein 1-like	protein_coding	NW_012350167.1	4364	7052	+
gene73218:106591372	-1.99895	0.513999	39.3721	3.83753e-09	1.34041e-07	XP_014038071.1	LOC106591372	zinc finger protein 239-like	protein_coding	NW_012343861.1	39904	41437	-
gene73433:106592792	1.36756	2.76975	15.4293	0.000132494	0.000957288	XP_014039601.1	LOC106592792	thyroid receptor-interacting protein 11-like	protein_coding	NW_012348821.1	3645	14962	-	TRIP11
gene7355:100195269	1.13188	5.3264	17.4455	5.12214e-05	0.000430769	NP_001133770.1	phop1	Probable phosphatase phospho1	protein_coding	ssa03	59291961	59295493	-	PHOSPHO1
gene7367:106601000	1.59715	2.24905	12.5333	0.000539624	0.00309212	XP_014048311.1	LOC106601000	telethonin-like	protein_coding	ssa03	59647078	59650189	-
gene73782:106593650	-1.45836	0.966508	29.6461	2.16904e-07	4.25076e-06	XP_014040486.1	LOC106593650	gastrula zinc finger protein XlCGF17.1-like	protein_coding	NW_012350640.1	4732	10774	+	ZNF180
gene7385:106601018	2.45261	2.80157	22.8672	4.27865e-06	5.31325e-05	XP_014048341.1	LOC106601018	heat shock 70 kDa protein-like	protein_coding	ssa03	60023904	60027314	-	HSPA1B
gene73910:106590752	1.6236	0.878992	12.0613	0.000679336	0.00373327	XP_014037384.1	LOC106590752	nuclear factor 1 X-type-like	protein_coding	NW_012341900.1	443	31875	-	NFIX
gene7398:106601028	1.05012	3.66449	19.3805	2.07164e-05	0.000202168	XP_014048367.1	LOC106601028	polymerase I and transcript release factor-like	protein_coding	ssa03	60599380	60625652	-	PTRF
gene73993:106593397	1.48495	1.21054	14.1606	0.000243277	0.00158928					NW_012350059.1	3738	10991	-
gene74286:106590822	1.52916	-0.486152	10.678	0.0013544	0.00660392	XP_014037463.1	LOC106590822	fatty acid desaturase 2-like	protein_coding	NW_012341990.1	4220	8631	+
gene74361:106593950	1.73662	2.01884	9.84327	0.00207034	0.00931544	XP_014040802.1	rbm47	RNA binding motif protein 47	protein_coding	NW_012351385.1	39	7080	-	RBM47
gene74364:106595723	2.52451	-1.09388	20.5815	1.19141e-05	0.000126405	XP_014042556.1	LOC106595723	putative uncharacterized protein DDB_G0282133	protein_coding	NW_012356787.1	6125	7633	-	CCDC70
gene7462:106601112	-2.21902	2.61883	123.955	3.51319e-21	2.90918e-18	XP_014048518.1	LOC106601112	UNC93-like protein MFSD11	protein_coding	ssa03	62406109	62415949	+
gene74638:106590760	1.9261	0.806901	16.4884	7.98954e-05	0.000627755					NW_012341908.1	11373	24658	-
gene7472:106601104	1.51279	1.56072	11.8126	0.000769155	0.00413713					ssa03	62936968	62945320	+
gene7485:106601093	1.22143	3.41846	26.2535	9.43385e-07	1.47666e-05	XP_014048485.1	LOC106601093	MKL/myocardin-like protein 2	protein_coding	ssa03	63415416	63469133	+
gene74853:106591381	1.35433	0.0503023	13.7719	0.000293718	0.00186672					NW_012343894.1	6558	8122	+
gene7495:106601084	-2.17967	1.65692	78.5792	2.59716e-15	6.08113e-13	XP_014048465.1	LOC106601084	DNA-3-methyladenine glycosylase-like	protein_coding	ssa03	63627716	63635153	+	MPG
gene750:106601367	-1.75825	0.48246	10.0704	0.00184159	0.00848124	XP_014049021.1	LOC106601367	interleukin-17A-like	protein_coding	ssa01	31625318	31627236	-
gene75212:106591248	-1.36948	0.839387	14.7997	0.000178754	0.00123176					NW_012343613.1	33443	38020	+
gene75228:106592199	1.32501	2.55213	20.6866	1.13588e-05	0.000121309	XP_014038993.1	LOC106592199	protein FAM83G-like	protein_coding	NW_012347811.1	6926	17824	-	FAM83G
gene7547:100195206	1.12396	4.45897	10.4214	0.00154631	0.00734456	NP_001133707.1	epor	erythropoietin receptor	protein_coding	ssa03	64267117	64272460	+	EPOR
gene7551:106601291	-1.19438	2.13241	32.0561	7.79643e-08	1.76936e-06	XP_014048870.1	LOC106601291	growth arrest and DNA damage-inducible proteins-interacting protein 1-like	protein_coding	ssa03	64320117	64321372	-	GADD45GIP1
gene75544:106592749	1.28969	1.17884	15.909	0.000105165	0.000786791	XP_014039548.1	LOC106592749	ensconsin-like	protein_coding	NW_012348742.1	1082	14556	-	MAP7
gene75624:106595057	1.71289	0.072626	9.98881	0.00191861	0.00876462	XP_014041905.1	LOC106595057	protein furry homolog	protein_coding	NW_012354455.1	55	7575	-	FRY
gene7573:106601209	-1.07732	3.54616	45.815	3.01386e-10	1.48726e-08	XP_014048696.1	LOC106601209	activating transcription factor 7-interacting protein 1-like	protein_coding	ssa03	64956024	64966385	-
gene7580:106601215	-1.51814	2.38664	70.9907	3.27175e-14	5.4185e-12	XP_014048711.1	LOC106601215	coiled-coil domain-containing protein 134-like	protein_coding	ssa03	65096059	65115362	-	CCDC134
gene75851:106595633	1.46118	0.166191	11.6963	0.000814095	0.00434035	XP_014042474.1	LOC106595633	balbiani ring protein 6-like	protein_coding	NW_012356522.1	7	3516	-
gene7604:106601236	1.18375	2.446	44.2072	5.63616e-10	2.56506e-08	XP_014048753.1	LOC106601236	phosphomannomutase 1-like	protein_coding	ssa03	65465007	65473499	+	PMM1
gene76056:106594346	-1.52539	-0.129666	12.5146	0.000543141	0.0031086	XP_014041176.1	LOC106594346	Bardet-Biedl syndrome 4 protein-like	protein_coding	NW_012352488.1	7440	11790	-
gene76067:106595435	1.12589	0.782903	11.254	0.00101476	0.00520426	XP_014042281.1	LOC106595435	uncharacterized LOC106595435	protein_coding	NW_012355692.1	1806	4814	-
gene7609:106601241	1.63033	5.71754	64.4728	3.20445e-13	3.85795e-11	XP_014048762.1	LOC106601241	thyrotroph embryonic factor-like	protein_coding	ssa03	65518746	65523154	-	TEF
gene76109:106594202	1.29232	0.889644	10.2698	0.00166406	0.00781308	XP_014041053.1	LOC106594202	vitamin K-dependent protein S-like	protein_coding	NW_012352092.1	44	11143	-	PROS1
gene76277:106594513	2.35886	-1.14339	11.082	0.00110591	0.00559313	XP_014041358.1	LOC106594513	SH3 and multiple ankyrin repeat domains protein 1-like	protein_coding	NW_012352915.1	1795	7302	-	SHANK1
gene76376:106596522	1.39531	1.11378	16.7213	7.15616e-05	0.000572611	XP_014043284.1	LOC106596522	dual specificity protein phosphatase 16-like	protein_coding	NW_012360636.1	3142	6336	-
gene76572:106592320	-1.50881	0.872692	23.636	2.99832e-06	3.94405e-05	XP_014039133.1	LOC106592320	GTPase IMAP family member 7-like	protein_coding	NW_012347997.1	2786	8950	-	GIMAP7
gene76573:106592321	-1.0407	2.95213	27.2194	6.18065e-07	1.03025e-05					NW_012347997.1	11561	13531	-
gene76665:106591907	1.6038	2.25203	14.515	0.000205517	0.0013858	XP_014038653.1	LOC106591907	kinesin-like protein KIF1C	protein_coding	NW_012347388.1	271	13755	+	KIF1C
[truncated: 135 more rows]

## Sheet: T4_SPLL
gene_id	logFC	logCPM	F	PValue	FDR	protein_id	gene	product	gene_biotype	chrom	start	end	strand	HGNC.ID
gene10012:106603555	1.2878	2.33287	23.2663	3.53722e-06	9.37487e-05	XP_014052876.1	LOC106603555	glycerophosphodiester phosphodiesterase domain-containing protein 5-like	protein_coding	ssa04	48317901	48357987	+	GDPD5
gene10057:106603516	-1.02792	1.23079	14.625	0.000194428	0.0023685	XP_014052782.1	LOC106603516	transmembrane protein 211-like	protein_coding	ssa04	50981356	51145087	-	TMEM211
gene10156:106603414	-1.00661	1.23428	19.5475	1.91495e-05	0.000368354					ssa04	55960218	55962684	+
gene10188:106603639	1.2627	3.74661	25.613	1.25062e-06	3.99809e-05	XP_014053009.1	LOC106603639	zinc finger and BTB domain-containing protein 16-A	protein_coding	ssa04	56572579	56726438	-	ZBTB16
gene10246:106603697	-1.43809	0.241226	20.0222	1.53932e-05	0.000309973	XP_014053163.1	LOC106603697	uncharacterized LOC106603697	protein_coding	ssa04	61882185	61885741	+
gene10316:106603784	-1.22084	0.309601	15.75	0.00011343	0.0015364	XP_014053353.1	LOC106603784	zinc finger protein 544-like	protein_coding	ssa04	64584385	64591740	-
gene10342:106603759	-1.27876	1.92742	15.3098	0.000139962	0.00181438	XP_014053287.1	LOC106603759	zinc finger protein 665-like	protein_coding	ssa04	67193470	67222292	-
gene10527:100136800	-1.25061	0.870799	18.4826	3.13526e-05	0.000550674	NP_001117153.1	pitx1	paired-like homeodomain 1	protein_coding	ssa04	77683988	77694702	+	PITX1
gene10740:106604165	-1.16341	1.07348	14.8058	0.000178226	0.00220837	XP_014054058.1	LOC106604165	kelch-like protein 4	protein_coding	ssa05	4989640	5030567	+	KLHL4
gene10745:106604170	2.56298	8.07071	125.974	2.16541e-21	5.25128e-18	XP_014054065.1	LOC106604170	uncharacterized LOC106604170	protein_coding	ssa05	6002328	6060505	-	TSC22D3
gene1080:106604807	1.60707	1.45274	12.3557	0.000587712	0.00567826	XP_014055328.1	LOC106604807	cytochrome P450 1B1-like	protein_coding	ssa01	49710488	49726903	+	CYP1B1
gene10858:106604209	-1.02895	2.8598	33.3169	4.59394e-08	2.51158e-06	XP_014054129.1	LOC106604209	ATP synthase subunit O%2C mitochondrial-like	protein_coding	ssa05	7824670	7829287	-
gene10885:106604256	1.14085	1.59344	12.27	0.000612743	0.00585841	XP_014054210.1	LOC106604256	FH2 domain-containing protein 1-like	protein_coding	ssa05	9564944	9592223	-
gene1100:106604996	-1.81467	-0.433087	11.8424	0.000757154	0.00694471	XP_014055664.1	LOC106604996	vertebrate ancient opsin-like	protein_coding	ssa01	51567323	51590355	-
gene11005:106604396	-1.22186	0.00653379	10.9879	0.00115927	0.00967514	XP_014054449.1	LOC106604396	N-acetyllactosaminide beta-1%2C3-N-acetylglucosaminyltransferase 2-like	protein_coding	ssa05	15484680	15489712	+
gene11050:106604363	1.16635	4.06358	14.0216	0.000261175	0.00298256	XP_014054394.1	LOC106604363	LRRN4 C-terminal-like protein	protein_coding	ssa05	16112851	16114978	-	LRRN4CL
gene11087:106604492	-1.3397	0.0930564	16.517	7.88128e-05	0.00114252	XP_014054627.1	LOC106604492	extensin-like	protein_coding	ssa05	18595471	18600277	+
gene11111:106604469	2.21912	-0.0289048	13.1347	0.000400697	0.00420008	XP_014054583.1	ky	kyphoscoliosis peptidase	protein_coding	ssa05	19725253	19732029	-	KY
gene11332:106604687	1.62649	3.77426	38.4462	5.61771e-09	4.30535e-07	XP_014055069.1	LOC106604687	nocturnin-like	protein_coding	ssa05	31934070	31949002	+	NOCT
gene11345:106604698	-1.48882	-0.578272	11.1151	0.00108774	0.00918879					ssa05	32097121	32102207	+
gene11349:106604700	-1.03725	4.15022	112.094	9.45858e-20	1.23511e-16	XP_014055096.1	LOC106604700	ras-related protein Rap-2c	protein_coding	ssa05	32271808	32275642	+	RAP2C
gene11401:106604748	-1.43421	2.10506	34.0152	3.43367e-08	1.99617e-06	XP_014055201.1	LOC106604748	transcription cofactor vestigial-like protein 2	protein_coding	ssa05	33886293	33893855	-	VGLL1
gene11413:106604757	-1.26458	3.36358	52.7025	2.19679e-11	3.92543e-09	XP_014055230.1	LOC106604757	membrane transport protein XK-like	protein_coding	ssa05	34293463	34310243	+	XKRX
gene11414:106604810	-1.89811	-0.850112	16.3726	8.43884e-05	0.00120854	XP_014055329.1	LOC106604810	cytochrome b-245 heavy chain-like	protein_coding	ssa05	34311606	34318268	+	CYBB
gene1147:106605561	-1.88366	-0.722473	15.8244	0.000109486	0.00149484	XP_014056828.1	LOC106605561	uncharacterized LOC106605561	protein_coding	ssa01	54095606	54153722	-	TJAP1
gene11499:106604864	-1.37704	2.4339	68.3945	7.95165e-14	2.78316e-11	XP_014055415.1	LOC106604864	janus kinase and microtubule-interacting protein 1-like	protein_coding	ssa05	36485864	36533999	-
gene11590:106604943	-1.05245	0.588204	12.2679	0.000613378	0.00586118	XP_014055565.1	LOC106604943	nucleotide exchange factor SIL1-like	protein_coding	ssa05	40758225	40762394	+	SIL1
gene11742:106605100	-2.18924	-0.500385	17.7214	4.47194e-05	0.000731376	XP_014055878.1	LOC106605100	zinc finger and SCAN domain-containing protein 2-like	protein_coding	ssa05	49940854	49944255	+
gene11764:106604998	1.17026	2.11168	23.7196	2.88856e-06	7.97313e-05					ssa05	51078051	51090073	+
gene11769:106605123	1.26584	4.43859	98.4153	5.14419e-18	4.99001e-15	XP_014055930.1	LOC106605123	protein eva-1 homolog B-like	protein_coding	ssa05	51206406	51225958	+	EVA1B
gene1183:106606210	-1.3414	0.369757	17.1808	5.7628e-05	0.000889999					ssa01	55303317	55306874	+
gene11900:100136378	1.73424	5.12915	52.403	2.5184e-11	4.40733e-09	XP_014056187.1	LOC100136378	nuclear receptor subfamily 1 group D member 2	protein_coding	ssa05	54985944	54995916	-
gene11968:106605330	-1.21005	0.0146116	10.9376	0.00118883	0.00985745	XP_014056301.1	LOC106605330	HORMA domain-containing protein 1-like	protein_coding	ssa05	56914092	56922914	-	HORMAD1
gene11998:100195690	-1.72491	0.873136	45.3421	3.621e-10	4.37946e-08	NP_001134191.1	metl6	Methyltransferase-like protein 6	protein_coding	ssa05	58006207	58008526	+	METTL6
gene12009:106605365	-1.45758	2.22361	56.8544	4.74752e-12	1.04664e-09	XP_014056370.1	LOC106605365	uncharacterized LOC106605365	protein_coding	ssa05	58166154	58178539	-
gene12039:106605469	-1.39031	-0.319849	13.3013	0.000369363	0.00393111	XP_014056649.1	LOC106605469	phosphomevalonate kinase-like	protein_coding	ssa05	58797232	58801326	+
gene12065:100194515	-1.13517	4.15267	60.1435	1.44415e-12	3.63188e-10	NP_001133073.1	polr3gl	polymerase (RNA) III (DNA directed) polypeptide G like	protein_coding	ssa05	59375161	59385569	+	POLR3GL
gene12163:106605512	1.05117	1.62827	13.6479	0.000311973	0.0034311	XP_014056727.1	LOC106605512	E3 ubiquitin-protein ligase ZNRF2-like	protein_coding	ssa05	63340289	63426604	+	ZNRF2
gene12169:106605517	2.54762	-1.02432	15.8138	0.000110036	0.00150033	XP_014056732.1	LOC106605517	sodium- and chloride-dependent transporter XTRP3-like	protein_coding	ssa05	63529072	63550980	+	SLC6A20
gene12174:106605521	-1.4971	1.94914	20.9975	9.8543e-06	0.000214601	XP_014056737.1	LOC106605521	transmembrane protein 158-like	protein_coding	ssa05	63708257	63711267	+	TMEM158
gene12205:100195464	-1.33046	-0.047045	12.1577	0.000647692	0.00612359	NP_001133965.1	cxcr3	C-X-C chemokine receptor type 3	protein_coding	ssa05	64432365	64435875	-	CXCR3
gene12239:100194549	2.16713	2.57101	21.7961	6.90939e-06	0.000160892	NP_001133107.1	telt	titin-cap	protein_coding	ssa05	65551280	65552703	+	TCAP
gene12254:106605635	1.14114	3.19562	36.7868	1.09503e-08	7.76144e-07	XP_014056970.1	LOC106605635	B-cell receptor CD22-like	protein_coding	ssa05	65934664	65939695	+
gene12283:106605616	1.41066	2.22167	13.8303	0.000285822	0.00320051	XP_014056926.1	LOC106605616	zinc finger and BTB domain-containing protein 32-like	protein_coding	ssa05	66733656	66744865	+
gene12334:106605686	-1.16166	1.1698	16.4984	7.95127e-05	0.0011507	XP_014057051.1	LOC106605686	apolipoprotein C-II-like	protein_coding	ssa05	67829266	67831358	-	APOC2
gene12335:106605687	4.13109	0.986856	38.6611	5.14494e-09	4.0717e-07	XP_014057052.1	LOC106605687	uncharacterized LOC106605687	protein_coding	ssa05	67841956	67845089	-
gene12426:106605776	-1.21071	1.21307	22.6623	4.63849e-06	0.000116739	XP_014057186.1	LOC106605776	zinc finger protein 358-like	protein_coding	ssa05	69355710	69364362	+	ZNF524
gene12632:106605986	2.34889	0.654035	23.7859	2.80441e-06	7.77246e-05	XP_014057503.1	LOC106605986	RUN domain-containing protein 3B-like	protein_coding	ssa05	73903286	73911925	+	RUNDC3B
gene12634:106605987	-1.12757	1.7765	23.8992	2.66621e-06	7.45638e-05	XP_014057504.1	LOC106605987	solute carrier family 25 member 40-like	protein_coding	ssa05	73915259	73922762	-	SLC25A40
gene1267:106608700	-1.3956	0.402051	16.6615	7.36091e-05	0.00108186	XP_014062283.1	LOC106608700	dickkopf-related protein 1-like	protein_coding	ssa01	61030729	61032728	-	DKK1
gene12831:106606175	2.21968	0.753307	12.7896	0.000474992	0.00481387	XP_014057782.1	LOC106606175	metastasis suppressor protein 1-like	protein_coding	ssa05	80221311	80253708	-
gene12913:106606261	-1.24555	0.432542	17.0467	6.13812e-05	0.00093703	XP_014057883.1	LOC106606261	ketosamine-3-kinase-like	protein_coding	ssa06	2055153	2059387	-	FN3KRP
gene12962:106606312	2.16718	2.78982	113.774	5.87841e-20	9.19886e-17					ssa06	4107861	4115845	+
gene1314:106607606	1.11679	1.23933	18.1949	3.58456e-05	0.000610635	XP_014060204.1	LOC106607606	serine-rich coiled-coil domain-containing protein 2-like	protein_coding	ssa01	64807980	64887317	-	CCSER2
gene13241:106606595	-1.33974	2.18537	14.1197	0.000248302	0.00286446	XP_014058372.1	LOC106606595	protein NLRC3-like	protein_coding	ssa06	15045414	15063068	-	RNH1
gene1325:106607693	1.40144	0.470521	18.1907	3.59163e-05	0.000611532	XP_014060396.1	LOC106607693	gremlin-2-like	protein_coding	ssa01	65546900	65554132	-	GREM2
gene13279:106606631	-1.39507	2.16738	41.3863	1.71447e-09	1.61688e-07					ssa06	16374724	16380311	+
gene13298:106606647	-1.73093	3.63422	29.2495	2.59786e-07	1.09007e-05	XP_014058465.1	LOC106606647	NADPH oxidase organizer 1-like	protein_coding	ssa06	16715105	16719734	-	NOXO1
gene13360:106606712	-1.59783	1.775	15.5267	0.000126295	0.00167443	XP_014058542.1	LOC106606712	glycoprotein-N-acetylgalactosamine 3-beta-galactosyltransferase 1-like	protein_coding	ssa06	18837332	18838592	-	C1GALT1
gene13417:106606764	-1.16967	2.04543	24.1428	2.39226e-06	6.84242e-05	XP_014058598.1	LOC106606764	uncharacterized LOC106606764	protein_coding	ssa06	20550706	20564389	-
gene13469:106606823	1.00703	4.09276	43.4028	7.72589e-10	8.2745e-08	XP_014058670.1	LOC106606823	CD97 antigen-like	protein_coding	ssa06	22688928	22723381	+	ADGRE2
gene13602:106606840	2.35611	2.8105	41.8439	1.44511e-09	1.39383e-07	XP_014058698.1	LOC106606840	tripartite motif-containing protein 35-like	protein_coding	ssa06	23227575	23230326	-	TRIM35
gene13715:106606945	-1.04842	1.98666	31.8112	8.64419e-08	4.28444e-06	XP_014058915.1	LOC106606945	zinc phosphodiesterase ELAC protein 2-like	protein_coding	ssa06	26287333	26294244	+	ELAC2
gene13759:106606985	-1.58839	-0.433564	13.8154	0.000287581	0.00321654	XP_014058993.1	LOC106606985	zinc finger protein 2-like	protein_coding	ssa06	28360323	28363685	-	ZNF180
gene13765:106606992	1.14521	4.8009	18.1026	3.7621e-05	0.000635775	XP_014058999.1	LOC106606992	envoplakin-like	protein_coding	ssa06	28845525	28849013	+	EVPL
gene13814:106607042	-1.08507	1.99321	16.0047	0.000100486	0.00139509	XP_014059076.1	LOC106607042	cysteine protease ATG4D-like	protein_coding	ssa06	29883574	29892754	-	ATG4D
gene13819:106607038	-1.03182	3.43446	20.4404	1.27084e-05	0.000263407	XP_014059073.1	LOC106607038	transcription factor jun-B-like	protein_coding	ssa06	29993782	29995614	-	JUNB
gene13852:106607080	1.09721	4.28347	40.862	2.11258e-09	1.93849e-07	XP_014059146.1	LOC106607080	uncharacterized LOC106607080	protein_coding	ssa06	30800345	30804423	-
gene13869:106607101	-1.03463	2.40913	25.7372	1.18189e-06	3.83251e-05	XP_014059176.1	LOC106607101	activating transcription factor 7-interacting protein 1-like	protein_coding	ssa06	31401362	31410392	-
gene13954:106607159	3.52852	5.7176	221.046	7.36378e-31	6.39093e-27	XP_014059274.1	LOC106607159	cold shock domain-containing protein C2-like	protein_coding	ssa06	33682575	33687644	+	CSDC2
gene14024:106607370	-1.87391	0.132088	27.3776	5.76964e-07	2.12687e-05	XP_014059762.1	LOC106607370	DNA-3-methyladenine glycosylase-like	protein_coding	ssa06	34591838	34598364	-	MPG
gene14056:106607346	-1.03712	2.97536	53.1115	1.88623e-11	3.46159e-09	XP_014059707.1	LOC106607346	UNC93-like protein MFSD11	protein_coding	ssa06	35766467	35775686	-
gene14144:100194587	1.04542	6.42278	43.3364	7.93224e-10	8.46879e-08	XP_014059449.1	LOC100194587	protein phosphatase 1%2C regulatory (inhibitor) subunit 1b-like	protein_coding	ssa06	38398614	38426140	+	PPP1R1B
gene14147:106607269	2.29241	2.91638	21.2976	8.67814e-06	0.000193513	XP_014059541.1	LOC106607269	telethonin-like	protein_coding	ssa06	38461114	38464133	+
gene14213:106607496	1.60648	3.54562	38.6126	5.23079e-09	4.12331e-07	XP_014059972.1	LOC106607496	nuclear receptor subfamily 1 group D member 1-like	protein_coding	ssa06	40433684	40444584	+	NR1D1
gene14239:106607477	1.82888	6.03723	81.1795	1.1503e-15	7.1007e-13	XP_014059934.1	LOC106607477	pyruvate dehydrogenase (acetyl-transferring) kinase isozyme 2%2C mitochondrial-like	protein_coding	ssa06	41262924	41271441	+	PDK2
gene14257:106607467	1.84964	5.29264	47.8938	1.3936e-10	1.95513e-08	XP_014059922.1	LOC106607467	MAGUK p55 subfamily member 2-like	protein_coding	ssa06	41968935	42007802	+	MPP2
gene14258:106607466	5.03166	-0.0762394	38.7863	4.85964e-09	3.93044e-07	XP_014059921.1	LOC106607466	putative all-trans-retinol 13%2C14-reductase	protein_coding	ssa06	42007932	42014056	+
gene1444:106609062	-1.56095	-0.272974	12.6449	0.000509438	0.00507807	XP_014062919.1	LOC106609062	uncharacterized LOC106609062	protein_coding	ssa01	73740344	73765851	+
gene14486:106607709	-1.21764	0.799325	16.3142	8.67586e-05	0.00123555	XP_014060429.1	LOC106607709	cannabinoid receptor type 1A	protein_coding	ssa06	52857789	52862815	-	CNR1
gene14511:106607729	-1.07407	2.03789	34.7799	2.50012e-08	1.52118e-06	XP_014060474.1	LOC106607729	tyrosine-protein kinase SRK2-like	protein_coding	ssa06	54246309	54264022	+	FRK
gene14540:100194970	1.11118	6.12323	12.964	0.000437647	0.00451079	NP_001133471.1	ctgf	connective tissue growth factor	protein_coding	ssa06	55346038	55348882	-	CTGF
gene14657:106607835	-1.25987	3.32331	13.6159	0.000317786	0.00347812	XP_014060705.1	LOC106607835	atypical kinase ADCK3%2C mitochondrial-like	protein_coding	ssa06	60025149	60067077	+	ADCK3
gene14667:106607847	-1.14492	2.04036	28.1604	4.10951e-07	1.60925e-05	XP_014060742.1	LOC106607847	zinc transporter 2-like	protein_coding	ssa06	60230502	60255115	-	SLC30A2
gene14734:106607948	2.39373	-0.33223	21.5725	7.58777e-06	0.00017336	XP_014060938.1	LOC106607948	failed axon connections homolog	protein_coding	ssa06	62791889	62798772	-	FAXC
gene14807:106608000	-1.01277	1.06398	19.52	1.93939e-05	0.000372001	XP_014061065.1	epm2a	epilepsy%2C progressive myoclonus type 2A%2C Lafora disease (laforin)	protein_coding	ssa06	66327118	66348197	+	EPM2A
gene14861:106608044	-1.15543	0.0810536	12.7848	0.000475612	0.00481728	XP_014061182.1	cssa06h2orf44	chromosome ssa06 open reading frame%2C human C2orf44	protein_coding	ssa06	68610851	68617645	+	C2orf44
gene14867:106608058	-1.0687	5.45557	72.4017	2.02855e-14	8.39893e-12	XP_014061211.1	LOC106608058	tribbles homolog 2-like	protein_coding	ssa06	69217595	69230201	-
gene1493:106609599	2.19852	3.06874	31.8208	8.68411e-08	4.28636e-06	XP_014064038.1	LOC106609599	forkhead box protein J1-B-like	protein_coding	ssa01	75107702	75111902	+
gene15269:106608466	-1.26586	1.63722	35.6022	1.78038e-08	1.14049e-06	XP_014061871.1	LOC106608466	zinc finger protein OZF-like	protein_coding	ssa07	1984291	1990299	-
gene15270:106608465	-1.15111	0.685057	14.7107	0.000186568	0.00229336	XP_014061869.1	LOC106608465	piggyBac transposable element-derived protein 4-like	protein_coding	ssa07	2012167	2025643	-	PGBD3
gene15273:106608469	-1.37353	-0.0775106	17.8747	4.16242e-05	0.000691043	XP_014061874.1	LOC106608469	zinc finger protein 239-like	protein_coding	ssa07	2065573	2068351	-
gene15288:106608457	-1.17303	0.987075	11.5039	0.00089585	0.00793297	XP_014061863.1	LOC106608457	basic proline-rich protein-like	protein_coding	ssa07	2945757	2948739	+
gene1540:106609966	1.07546	0.823969	13.0736	0.000412839	0.00430476	XP_014064519.1	LOC106609966	cytohesin-3	protein_coding	ssa01	76494734	76553743	-	CYTH3
gene15543:106608647	1.16612	1.70549	22.2193	5.66302e-06	0.000137181	XP_014062200.1	plin2	perilipin 2	protein_coding	ssa07	12693760	12698814	+	PLIN2
gene15578:106608616	1.15942	3.71322	21.3747	8.31786e-06	0.000186772	XP_014062133.1	LOC106608616	peroxisome proliferator-activated receptor gamma coactivator 1-alpha-like	protein_coding	ssa07	14079243	14163998	+	PPARGC1A
gene15600:106608781	1.16284	2.79653	18.0833	3.77603e-05	0.000637177	XP_014062383.1	LOC106608781	arf-GAP domain and FG repeat-containing protein 2-like	protein_coding	ssa07	17194822	17211374	+
gene15602:106608776	1.11193	3.28798	14.8791	0.000172275	0.00214796	XP_014062379.1	LOC106608776	E3 ubiquitin-protein ligase KEG-like	protein_coding	ssa07	17328177	17332377	-
gene15690:106608816	-1.32513	0.481563	16.696	7.24216e-05	0.00107043	XP_014062451.1	ufsp1	UFM1-specific peptidase 1 (non-functional)	protein_coding	ssa07	19499758	19501676	-	UFSP1
gene15708:106608835	1.20596	1.98273	28.6857	3.27593e-07	1.32249e-05	XP_014062481.1	LOC106608835	Y+L amino acid transporter 2-like	protein_coding	ssa07	20319088	20336316	+	SLC7A7
gene15778:106608879	1.3364	3.52383	36.4633	1.25006e-08	8.57389e-07	XP_014062543.1	LOC106608879	protein inturned-like	protein_coding	ssa07	21594550	21628366	+	INTU
gene15839:106608947	1.4835	3.40969	42.7081	1.01569e-09	1.03245e-07	XP_014062667.1	LOC106608947	plasminogen activator inhibitor 1-like	protein_coding	ssa07	23205704	23213642	-	SERPINE1
gene15897:106608992	1.37075	1.63262	14.4	0.000216708	0.00256984	XP_014062784.1	LOC106608992	purine nucleoside phosphorylase-like	protein_coding	ssa07	24942949	24951777	+	PNP
gene15930:106609018	-1.30102	0.89566	12.1964	0.000635421	0.00602771	XP_014062822.1	LOC106609018	myeloid-associated differentiation marker homolog	protein_coding	ssa07	25750243	25754547	+	MYADM
gene16020:106609113	-1.49727	1.7824	38.9091	4.62457e-09	3.81089e-07	XP_014063018.1	LOC106609113	putative Dol-P-Glc:Glc(2)Man(9)GlcNAc(2)-PP-Dol alpha-1%2C2-glucosyltransferase	protein_coding	ssa07	32363465	32366216	+	ALG10
gene16076:106609244	1.52897	1.27956	18.151	3.65866e-05	0.000621698	XP_014063281.1	LOC106609244	uncharacterized LOC106609244	protein_coding	ssa07	34079240	34086061	-
gene16077:106609245	1.75488	4.5513	76.5926	5.02054e-15	2.62235e-12	XP_014063284.1	LOC106609245	forkhead box protein P2-like	protein_coding	ssa07	34088212	34206531	+
gene16116:106609204	-1.59839	3.58183	82.0694	8.34412e-16	5.34511e-13	XP_014063199.1	LOC106609204	zinc finger protein 800-like	protein_coding	ssa07	35670511	35699453	+	ZNF800
gene16267:106609456	-1.892	-0.614416	15.3482	0.000137414	0.00178817	XP_014063788.1	LOC106609456	mitogen-activated protein kinase 11-like	protein_coding	ssa07	41889124	41903399	+	MAPK11
gene16295:106609466	2.80452	-0.753723	17.3867	5.23148e-05	0.000824578	XP_014063804.1	LOC106609466	bcl-2-like protein 13	protein_coding	ssa07	42433234	42442308	+
gene16332:106609430	-1.48189	3.21492	73.7888	1.27195e-14	5.83569e-12	XP_014063739.1	LOC106609430	uncharacterized LOC106609430	protein_coding	ssa07	43018381	43027266	+
gene16405:106609517	1.43393	6.62276	71.8036	2.49854e-14	9.8637e-12	XP_014063902.1	LOC106609517	sodium-coupled neutral amino acid transporter 2-like	protein_coding	ssa07	45708617	45720011	-	SLC38A2
gene16406:106609518	1.55947	6.5014	113.333	6.65861e-20	9.41944e-17	XP_014063905.1	LOC106609518	sodium-coupled neutral amino acid transporter 4-like	protein_coding	ssa07	45746913	45779055	-
gene16418:106609526	-1.11504	2.72769	18.9132	2.56723e-05	0.000467024	XP_014063920.1	LOC106609526	diphosphoinositol polyphosphate phosphohydrolase 3-beta-like	protein_coding	ssa07	46053811	46065902	-	NUDT4
gene16545:106609631	1.32603	1.26414	14.3101	0.000226314	0.00266052	XP_014064062.1	LOC106609631	semaphorin-3aa-like	protein_coding	ssa07	49792285	49795023	-
gene16567:106609653	-1.07929	3.28636	14.438	0.000213045	0.00253525	XP_014064092.1	LOC106609653	poly [ADP-ribose] polymerase 11-like	protein_coding	ssa07	50912659	50916657	-	PARP11
gene16689:106609772	-1.10295	1.18922	18.9697	2.50093e-05	0.000458473	XP_014064256.1	LOC106609772	uncharacterized LOC106609772	protein_coding	ssa07	55052369	55056790	+	CCDC107
gene16782:106609871	-1.41399	-0.0375533	13.7498	0.000296897	0.0032941	XP_014064367.1	LOC106609871	zinc finger and SCAN domain-containing protein 21-like	protein_coding	ssa08	187873	201487	-
gene16803:106609891	-1.06088	0.916081	14.5288	0.000203649	0.00245094	XP_014064404.1	LOC106609891	transmembrane protein 132A-like	protein_coding	ssa08	610857	622894	-
gene16895:106609978	1.18969	5.36082	32.5431	6.40229e-08	3.30843e-06	XP_014064536.1	LOC106609978	RING finger protein 24-like	protein_coding	ssa08	4080337	4141674	-	RNF24
gene16952:106610042	-1.40675	1.32647	22.2248	5.64888e-06	0.000137087	XP_014064638.1	LOC106610042	endothelial zinc finger protein induced by tumor necrosis factor alpha-like	protein_coding	ssa08	7854722	7857385	+
gene16957:106610049	-1.27217	0.198123	17.0177	6.22251e-05	0.000947638	XP_014064648.1	LOC106610049	zinc finger protein 629-like	protein_coding	ssa08	7967373	7971540	+
gene16958:106610047	-1.07908	0.46883	14.957	0.000165743	0.00208335	XP_014064645.1	LOC106610047	zinc finger protein 271-like	protein_coding	ssa08	7976809	7980054	+
gene17006:106610103	-1.24942	0.2241	13.3412	0.000362241	0.00386865	XP_014064747.1	LOC106610103	oocyte zinc finger protein XlCOF8.4-like	protein_coding	ssa08	8863507	8866842	-
gene17013:106610077	-1.12419	1.20702	21.9044	6.52879e-06	0.000154037					ssa08	8949480	8970396	-
gene17020:106610141	-1.36296	0.442257	20.1884	1.42628e-05	0.00029031	XP_014064791.1	LOC106610141	zinc finger protein 813-like	protein_coding	ssa08	9221008	9229909	-
gene17024:106610095	-1.09224	0.497788	10.9052	0.00120836	0.00997676	XP_014064734.1	LOC106610095	zinc finger protein 18-like	protein_coding	ssa08	9267149	9282915	+
gene17025:106610116	-1.733	1.1024	47.1324	1.81215e-10	2.4289e-08	XP_014064761.1	LOC106610116	zinc finger protein 629-like	protein_coding	ssa08	9283348	9445659	+
[truncated: 800 more rows]

## Sheet: T5_LL
gene_id	logFC	logCPM	F	PValue	FDR	protein_id	gene	product	gene_biotype	chrom	start	end	strand	HGNC.ID
[truncated: 135 more rows]

[truncated: 5 more sheets: T5_SP, T5_SPLL, T6_LL, T6_SP, T6_SPLL]
